# Supplementary material for: Homogeneous cobalt-catalyzed reductive amination for synthesis of functionalized primary amines
Source: PubMed Central journal article supplement (PMC6884468; doi:10.1038/s41467-019-13351-7), 2019-11-29
Supplement: 41467_2019_13351_MOESM2_ESM.pdf [file 41467_2019_13351_MOESM2_ESM.pdf]

## Supplementary Information

# Homogeneous cobalt-catalyzed reductive amination for synthesis of functionalized primary amines

Murugesan et al

## Supplementary methods

### Crystal data for complex A and complex B

**Crystal data for complex A:**  $C_{68}H_{66}B_2CoF_8P_6$ ,  $M = 1301.57$ , monoclinic, space group  $C2/c$ ,  $a = 27.9413(8)$ ,  $b = 21.6226(6)$ ,  $c = 25.4121(6)$  Å,  $\beta = 114.9250(14)^\circ$ ,  $V = 13923.1(7)$  Å<sup>3</sup>,  $T = 150(2)$  K,  $Z = 8$ , 101327 reflections measured, 12330 independent reflections ( $R_{int} = 0.1008$ ), final  $R$  values ( $I > 2\sigma(I)$ ):  $R_1 = 0.0483$ ,  $wR_2 = 0.1182$ , final  $R$  values (all data):  $R_1 = 0.0656$ ,  $wR_2 = 0.1291$ , 658 parameters. Contributions of co-crystallized solvent molecules were removed from the diffraction data with PLATON/ SQUEEZE (Spek, A. L. *Acta Cryst.* **2015**, C71, 9).

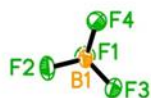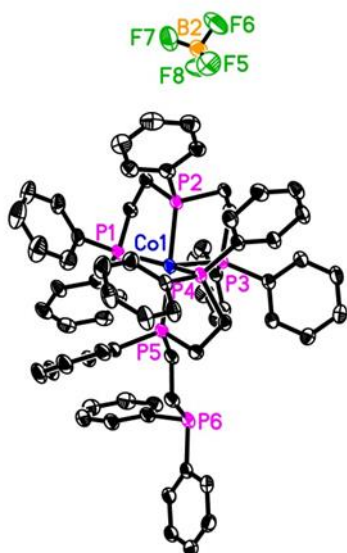

### ORTEP representation of complex A.

Displacement ellipsoids corresponds to 30% probability. Hydrogen atoms are omitted for clarity. Selected bond lengths [Å] and angles [°]: Co1-P2-2.2477(9), Co1-P1 2.2672(8), Co1-P4 2.2776(8), Co1-P5 2.2789(9), Co1-P3 2.4808(9); P2-Co1-P1 83.64(3), P2-Co1-P4 93.34(3), P1-Co1-P4 152.13(4), P2-Co1-P5 175.34(4), P1-Co1-P5 97.91(3), P4-Co1-P5 83.23(3), P2-Co1-P3 83.38(3), P1-Co1-P3 102.31(3), P4-Co1-P3 104.86(3), P5-Co1-P3 100.52(3).

*HRMS for Complex A:* HRMS (ESI-TOF,  $m/z$ ): Calcd for  $C_{68}H_{66}CoP_6$   $[M]^{2+}$  563.6466; found 563.6453.

## ESI-TOF Accurate Mass Report

Page 1

Results file: E:\Projects\1902.PRO\SampleDB\1902.rpt  
Last modified: Tuesday, February 26, 2019 15:04:18

## Sample Summary:

| Sample | File     | Sample Name | User   | Target    | Formula                                          | Expected Mass | Observed Mass | Error PPM | Error mDa       |
|--------|----------|-------------|--------|-----------|--------------------------------------------------|---------------|---------------|-----------|-----------------|
| 245    | 19022608 | KM22-446A   | Kathir | 1127.2922 | C <sub>68</sub> H <sub>66</sub> CoP <sub>6</sub> | 563.6466      | 563.6453      | -2.3      | -1.3 <i>K+2</i> |

## ESI-TOF Accurate Mass Report

Page 2

File:19022608

Vial:1.C.3

Description:MeOH/0.1%HCOOH in H<sub>2</sub>O 9:1

Sample Name:KM22-446A

Date:26-Feb-2019

UserName:Kathir

Time:14:57:27

## Sample Report:

(Time: 0.64) Combine (54:64-(2:6+111:115))

563.6453  
-2.3 PPM  
-1.3 mDa

1:TOF MS ES+  
2.5e+07

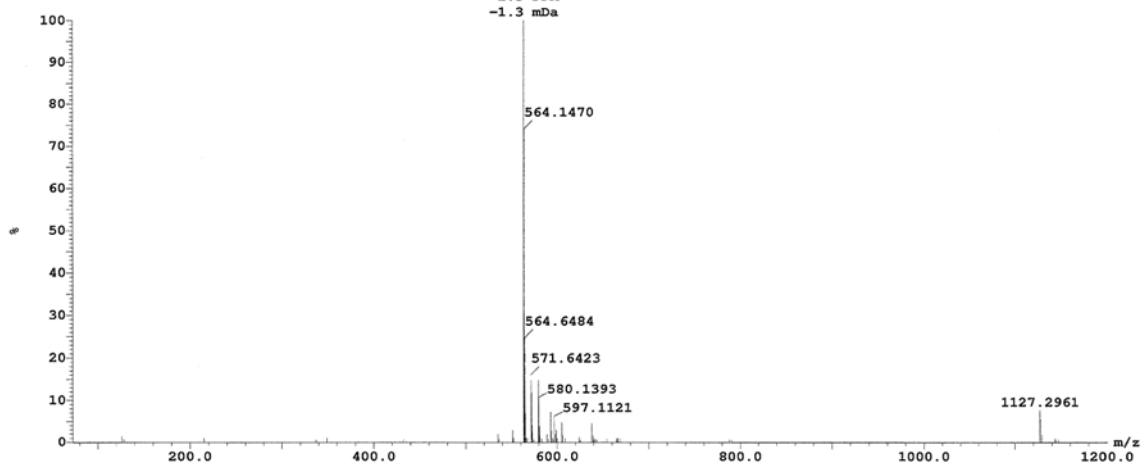

Supplementary Figure 1. HRMS of paramagnetic complex-A

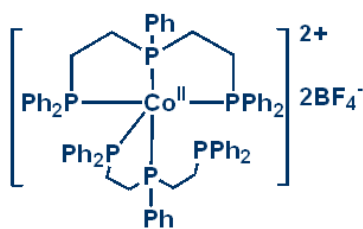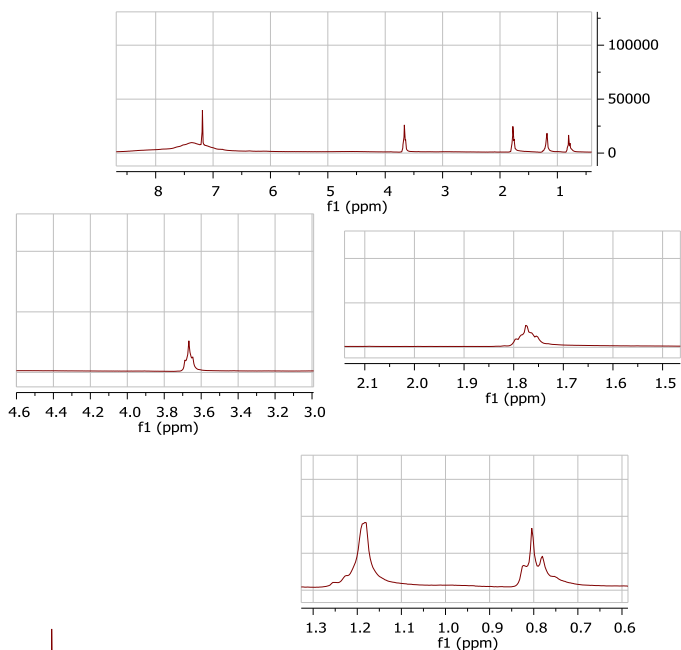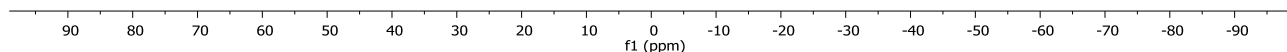

**Supplementary Figure 2. <sup>1</sup>H NMR (300 MHz, Chloroform-*d*) of paramagnetic complex-A**

190606.40a.3.fid  
KM 22-446 // Co complex detail

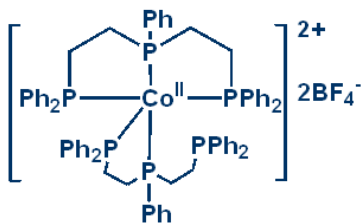

5.32025  
5.23905  
5.23231  
5.22957

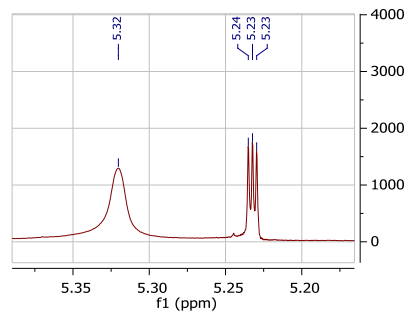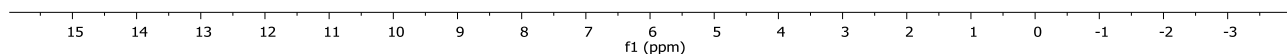

**Supplementary Figure 3. <sup>1</sup>H NMR (400 MHz, Dichloromethane-*d*<sub>2</sub>) of complex-A by The Evans Method**



Paramagnetic susceptibility measurement preliminary results:

| Entry | Measurement                   | Data                                        |
|-------|-------------------------------|---------------------------------------------|
| 1     | Observed paramagnetic shift   | 0,088 ppm ( $^1\text{H}$ )                  |
| 2     | Mass susceptibility $\chi_m$  | $8,92 \cdot 10^{-10} \text{ m}^3/\text{kg}$ |
| 3     | Molar susceptibility $\chi_M$ | $1,16 \cdot 10^{-9} \text{ m}^3/\text{mol}$ |
| 4     | Number of unpaired electron   | 1                                           |

**Crystal data for complex B:**  $\text{C}_{70}\text{H}_{72}\text{B}_2\text{CoF}_8\text{O}_3\text{P}_6$ ,  $M = 1379.64$ , triclinic, space group  $P1$ ,  $a = 10.8798(2)$ ,  $b = 14.9770(3)$ ,  $c = 21.8175(5) \text{ \AA}$ ,  $\alpha = 102.2273(9)$ ,  $\beta = 92.1113(9)$ ,  $\gamma = 107.3687(9)^\circ$ ,  $V = 3296.88(12) \text{ \AA}^3$ ,  $T = 150(2) \text{ K}$ ,  $Z = 2$ , 39417 reflections measured, 11604 independent reflections ( $R_{\text{int}} = 0.0409$ ), final  $R$  values ( $I > 2\sigma(I)$ ):  $R_1 = 0.0554$ ,  $wR_2 = 0.1488$ , final  $R$  values (all data):  $R_1 = 0.0631$ ,  $wR_2 = 0.1559$ , 742 parameters.

**CCDC 1897492-1897493** contain the supplementary crystallographic data for this paper. These data are provided free of charge by The Cambridge Crystallographic Data Centre.

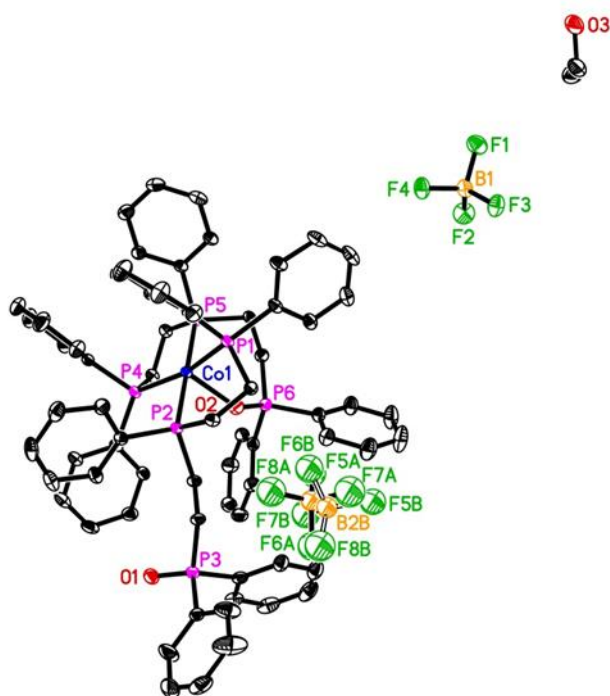

**ORTEP representation of complex B.**

Displacement ellipsoids corresponds to 30% probability. Hydrogen atoms are omitted for clarity. One  $\text{BF}_4$  anion is disordered over two sites with occupancies of 0.608(5) : 0.392(5). Lower occupancy sites are depicted with open bonds. Selected bond lengths [ $\text{\AA}$ ] and angles [ $^\circ$ ]: Co1-O2 2.137(2), Co1-P4 2.2507(9), Co1-P5 2.2509(8), Co1-P1 2.2732(9), Co1-P2 2.2811(8), P6-O2 1.507(2), P3-O1 1.485(3); O2-Co1-P4 97.44(8), O2-Co1-P5 90.71(6), P4-Co1-P5 82.86(3), O2-Co1-P1 96.58(7), P4-Co1-P1 165.98(4), P5-Co1-P1 97.01(3), O2-Co1-P2 89.18(6), P4-Co1-P2 96.71(3), P5-Co1-P2 179.54(3), P1-Co1-P2 83.44(3).

**HRMS for Complex B:** HRMS (ESI-TOF,  $m/z$ ): Calcd for  $\text{C}_{68}\text{H}_{66}\text{CoP}_6\text{O}_2 [\text{M}]^{2+}$  579.6415; found 579.6400.

ESI-TOF Accurate Mass Report

Page 1

Results file: E:\Projects\1902.PRO\SampleDB\1902.rpt  
Last modified: Tuesday, February 26, 2019 14:52:06

Sample Summary:

| Sample | File     | Sample Name | User   | Target                 | Formula                                                                                                             | Expected Mass        | Observed Mass | Error PPM | Error mDa         |
|--------|----------|-------------|--------|------------------------|---------------------------------------------------------------------------------------------------------------------|----------------------|---------------|-----------|-------------------|
| 250    | 19022607 | KM22-112A   | Kathir | 1127.2922<br>1159.2821 | C <sub>68</sub> H <sub>66</sub> CoP <sub>6</sub><br>C <sub>68</sub> H <sub>66</sub> CoP <sub>6</sub> O <sub>2</sub> | 563.6466<br>579.6415 | 579.6400      | -2.6      | -1.5 <i>ky 2+</i> |

ESI-TOF Accurate Mass Report

Page 2

File:19022607

Sample Name:KM22-112A  
Date:26-Feb-2019

UserName:Kathir  
Time:14:47:44

Vial:1:C,1

Description:MeOH/0.1%HCOOH in H<sub>2</sub>O 9:1

Sample Report:

(Time: 0.67) Combine (57:66-(5:9+114:118))

1:TOF MS ES+  
2.3e+007

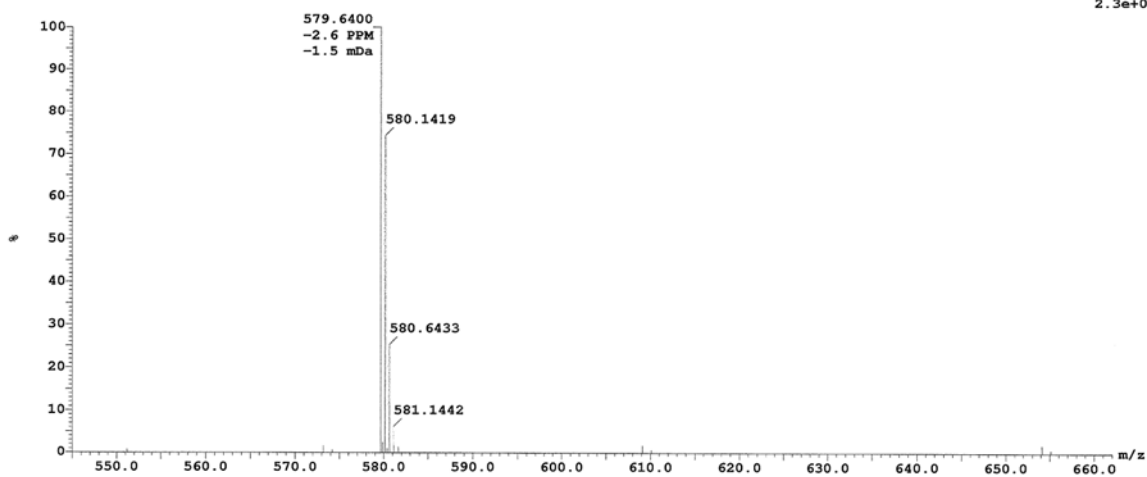

Supplementary Figure 4. HRMS of complex-B

## Supplementary Tables

Supplementary Table 1. Reductive amination of 4-methylbenzaldehyde with cobalt-phosphine complexes.

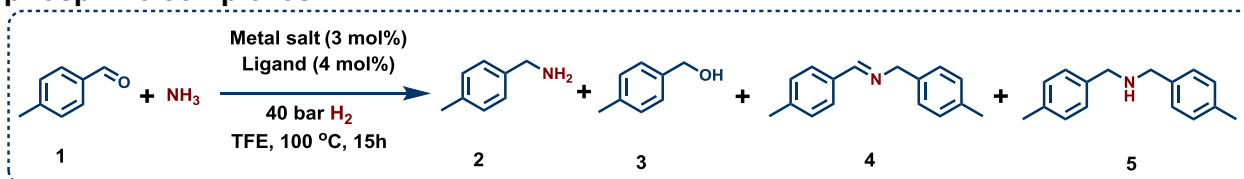

| Entry          | Ligand | Conv. (%) | Yield of 2 (%) | Yield of 3 (%) | Yield of 4 (%) | Yield of 5 (%) |
|----------------|--------|-----------|----------------|----------------|----------------|----------------|
| 1 <sup>a</sup> | L7     | >99       | 96             | -              | 2              | -              |
| 2 <sup>b</sup> | L7     | 60        | 10             | -              | 48             | -              |
| 3 <sup>c</sup> | L7     | 90        | 60             | -              | 28             | -              |
| 4 <sup>d</sup> | L7     | 95        | 88             | -              | 5              | -              |
| 5 <sup>e</sup> | -      | 20        | -              | -              | 18             | -              |
| 6 <sup>f</sup> | L7     | -         | -              | -              | -              | -              |
| 7 <sup>g</sup> | L7     | >99       | -              | 98             | -              | -              |
| 8 <sup>h</sup> | -      | >99       | 96             | -              | 2              | -              |
| 9 <sup>i</sup> | -      | 72        | -              | -              | 70             | -              |

Reaction conditions: <sup>a</sup>0.5 mmol 4-methylbenzaldehyde, 3 mol% Co(BF<sub>4</sub>)<sub>2</sub>·6H<sub>2</sub>O, 4 mol% triphos (L7), 5-7 bar NH<sub>3</sub>, 40 bar H<sub>2</sub>, 2 mL trifluoroethanol (TFE), 100 °C, 15 h, GC yields using n-hexadecane as standard. <sup>b</sup>Same as 'a' with 20 bar H<sub>2</sub>. <sup>c</sup>Same as 'a' at 80 °C. <sup>d</sup>Same as 'a' with 2 mol% of catalyst. <sup>e</sup>Same as 'a' without ligand (L7). <sup>f</sup>Same as 'a' without ammonia. <sup>g</sup>Same as 'a' without ammonia and using 10 mol% of *t*-BuOK. <sup>h</sup>Same as 'a' with 3 mol% of complex A instead of Co(BF<sub>4</sub>)<sub>2</sub>·6H<sub>2</sub>O /triphos (L7). <sup>i</sup>Same as 'a' with 3 mol% of complex B instead of Co(BF<sub>4</sub>)<sub>2</sub>·6H<sub>2</sub>O /triphos (L7).

**Supplementary Table 2. Influence of solvents in reductive amination of 4-methylbenzaldehyde.**

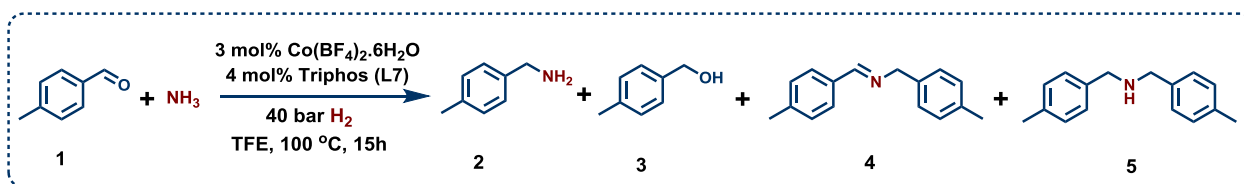

| Entry | Solvent                | Conv. (%) | Yield of 2 (%) | Yield of 3 (%) | Yield of 4 (%) | Yield of 5 (%) |
|-------|------------------------|-----------|----------------|----------------|----------------|----------------|
| 1     | Toluene                | 10        | -              | -              | 8              | -              |
| 2     | THF                    | 20        | -              | -              | 18             | -              |
| 3     | <i>t</i> -Amyl alcohol | 40        | -              | -              | 35             | -              |
| 4     | <i>t</i> -BuOH         | 2         | -              | -              | 1              | -              |
| 5     | IPA                    | 80        | 60             | -              | 18             | -              |
| 6     | MeOH                   | 90        | 80             | -              | 8              | -              |
| 7     | Trifluoroethanol       | >99       | 96             | -              | 2              | -              |

Reaction conditions: 0.5 mmol 4-methylbenzaldehyde, 3 mol%  $\text{Co}(\text{BF}_4)_2 \cdot 6\text{H}_2\text{O}$ , 4 mol% linear triphos (**L7**), 5-7 bar  $\text{NH}_3$ , 40 bar  $\text{H}_2$ , 2 mL solvent, 100 °C, 15 h, GC yields using n-hexadecane as standard.

**Supplementary Table 3. Reductive amination of 4-methylbenzaldehyde with Co- salts.**

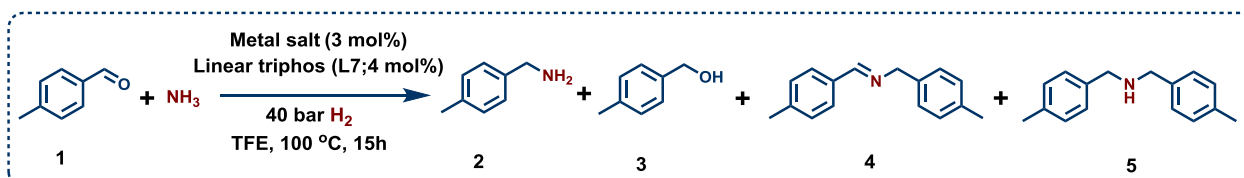

| Entry | Cobalt salt                                               | Ligand | Conv. (%) | Yield of 2 (%) | Yield of 3 (%) | Yield of 4 (%) | Yield of 5 (%) |
|-------|-----------------------------------------------------------|--------|-----------|----------------|----------------|----------------|----------------|
| 1     | $\text{Co}_2(\text{CO})_8$                                | L7     | 90        | 68             | -              | 20             | -              |
| 2     | $\text{Co}(\text{PPh}_3)_3\text{Cl}$                      | L7     | 95        | 88             | -              | 5              | -              |
| 3     | $\text{Co}(\text{BF}_4)_2 \cdot 6\text{H}_2\text{O}$      | L7     | >99       | 96             | -              | 2              | -              |
| 4     | $\text{Co}(\text{acac})_3$                                | L7     | 70        | -              | -              | 68             | -              |
| 5     | $\text{Co}[(\text{NH}_3)_6]\text{Cl}_3$<br>Werner complex | L7     | 10        | -              | -              | 8              | -              |

Reaction conditions: 0.5 mmol 4-methylbenzaldehyde, 3 mol% Cobalt salt, 4 mol% linear triphos (**L7**), 5-7 bar  $\text{NH}_3$ , 40 bar  $\text{H}_2$ , 2 mL trifluoroethanol (TFE), 100 °C, 15 h, GC yields using n-hexadecane as standard.

## Catalytic poisoning test

Supplementary Table 4. Catalyst poisoning experiments using Hg and PPh<sub>3</sub>.

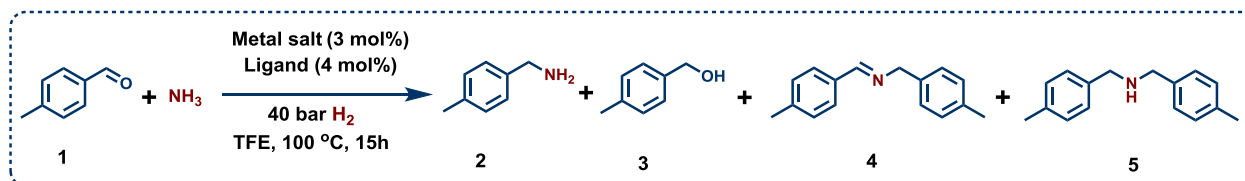

| Entry          | Catalytic poison           | Conv. (%) | Yield of 2 (%) | Yield of 3 (%) | Yield of 4 (%) | Yield of 5 (%) |
|----------------|----------------------------|-----------|----------------|----------------|----------------|----------------|
| 1 <sup>a</sup> | Hg (2 eq)                  | >99       | 94             | -              | 4              | -              |
| 2 <sup>a</sup> | PPh <sub>3</sub> (50 mol%) | >99       | 93             | -              | 5              | -              |
| 3 <sup>b</sup> | Hg (2 eq)                  | >99       | 96             | -              | 2              | -              |
| 4 <sup>b</sup> | PPh <sub>3</sub> (50 mol%) | >99       | 95             | -              | 3              | -              |

Reaction conditions: <sup>a</sup>0.5 mmol 4-methylbenzaldehyde, 3 mol% complex **A**, 5-7 bar NH<sub>3</sub>, 40 bar H<sub>2</sub> 2 mL trifluoroethanol (TFE), 100 °C, 15 h, GC yields using n-hexadecane as standard. <sup>b</sup>same as 'a' using 120°C for 24 h.

## Comparison of activities and selective of different catalysts

Comparison reactivity and selectivity of Co-triphos system with previously reported Co-nanoparticles and Ru-based complexes for the reductive amination to prepare primary amines

### A) This work with Co-triphos catalyst

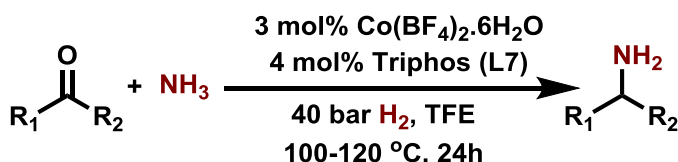

### B) Using previously reported Co-nanoparticles (ref: *Science*, 2017, 358, 326-332)

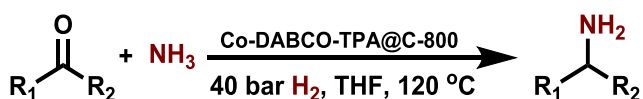

### B) Using Ru and Rh-based homogeneous catalysts

|   |                                                                                                                                                                                       |                                           |
|---|---------------------------------------------------------------------------------------------------------------------------------------------------------------------------------------|-------------------------------------------|
| 1 | $\text{R}_1\text{-C(=O)-R}_2 + \text{NH}_3 \xrightarrow[\text{40 bar H}_2, \text{ t-amyl alcohol, 130 °C}]{\text{Ru(PPh}_3)_3\text{Cl}_2} \text{R}_1\text{-CH(NH}_2\text{)-R}_2$      | <i>Nature Commun.</i> , 2018, 9, 4123.    |
| 2 | $\text{R}_1\text{-C(=O)-R}_2 + \text{NH}_3 \xrightarrow[\text{40 bar H}_2, \text{ 120 °C}]{\text{Ru(CO)ClH(PPh}_3)_3, \text{ dppe, Al(OTf)}_3} \text{R}_1\text{-CH(NH}_2\text{)-R}_2$ | <i>Adv. Synth. Catal.</i> 2016, 358, 358. |
| 3 | $\text{R-CHO} + \text{Aq. NH}_3 \xrightarrow[\text{65 bar H}_2, \text{ 135 °C, THF:H}_2\text{O, NH}_4\text{OAc}]{\text{[Rh(cod)Cl]}_2, \text{ TPPTS}} \text{R-CH}_2\text{NH}_2$       | <i>Org. Lett.</i> , 2002, 12, 2055.       |

**Supplementary Table 5. Comparison of Co-triphos with previously reported Ru-complexes.**

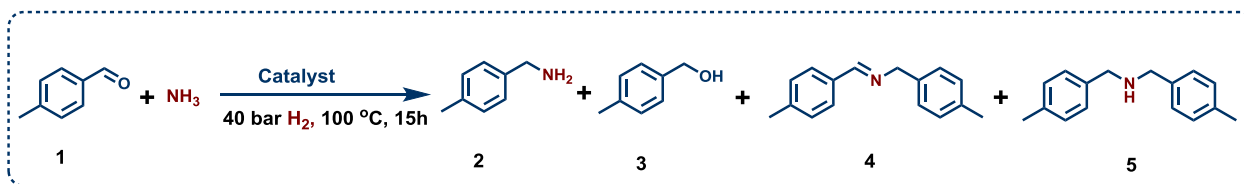

| Entry          | Catalyst                                                         | Conv. (%) | Yield of 2 (%) | Yield of 3 (%) | Yield of 4 (%) | Yield of 5 (%) |
|----------------|------------------------------------------------------------------|-----------|----------------|----------------|----------------|----------------|
| 1 <sup>A</sup> | Co-triphos(2019)<br>This work                                    | >99       | 96             | -              | 2              | -              |
| 2 <sup>B</sup> | Ru (2018)<br><i>Nature Commun.</i> ,<br><b>2018</b> , 9, 4123    | 72        | -              | -              | 70             | -              |
| 3 <sup>C</sup> | Ru (2016)<br><i>Adv. Synth. Catal.</i><br><b>2016</b> , 358, 358 | >99       | 30             | -              | 68             | -              |

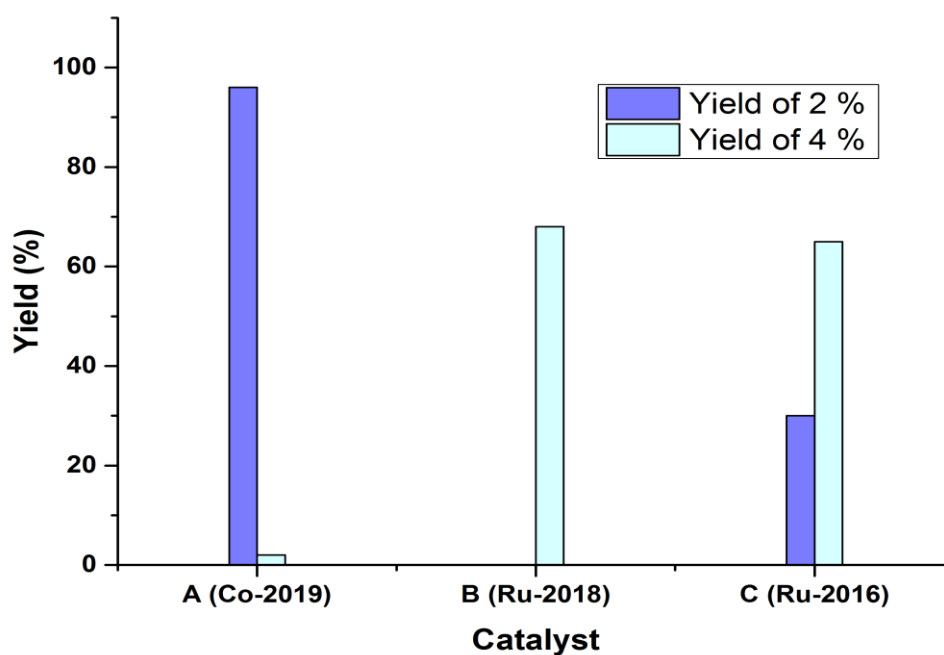

Reaction conditions: <sup>A</sup>0.5 mmol 4-methyl benzaldehyde, 3 mol%  $\text{Co}(\text{BF}_4)_2 \cdot 6\text{H}_2\text{O}$ , 4 mol% triphos (L7), 5-7 bar  $\text{NH}_3$ , 40 bar  $\text{H}_2$ , 2 mL trifluoroethanol (TFE), 100 °C, 15 h. <sup>B</sup>0.5 mmol 4-methyl benzaldehyde, 2 mol%  $\text{RuCl}_2(\text{PPh}_3)_3$ , 5-7 bar  $\text{NH}_3$ , 40 bar  $\text{H}_2$ , 2 mL *t*-amyl alcohol, 100 °C, 15 h. <sup>C</sup>0.5 mmol 4-methyl benzaldehyde, 1 mol%  $\text{Ru}(\text{Co})\text{Cl}(\text{PPh}_3)_3$ , 1.1 mol% dppe (L4),  $\text{Al}(\text{OTf})_3$  10 mol%, 5-7 bar  $\text{NH}_3$ , 40 bar  $\text{H}_2$ , 2 mL Toluene, 100 °C, 15 h GC yields using *n*-hexadecane as standard. Products 3 and 5 are not detected.

## DFT calculation

Cationic hydride  $[L7CoH]^+$  as active catalyst (Supplementary Figure 5): For Ph-CH=NH hydrogenation, the hydride mechanism starting with  $[L7CoH]^+$  species (**I**) in gas phase, in TFE solution and in TFE solution including GD3BJ dispersion was computed for comparison.

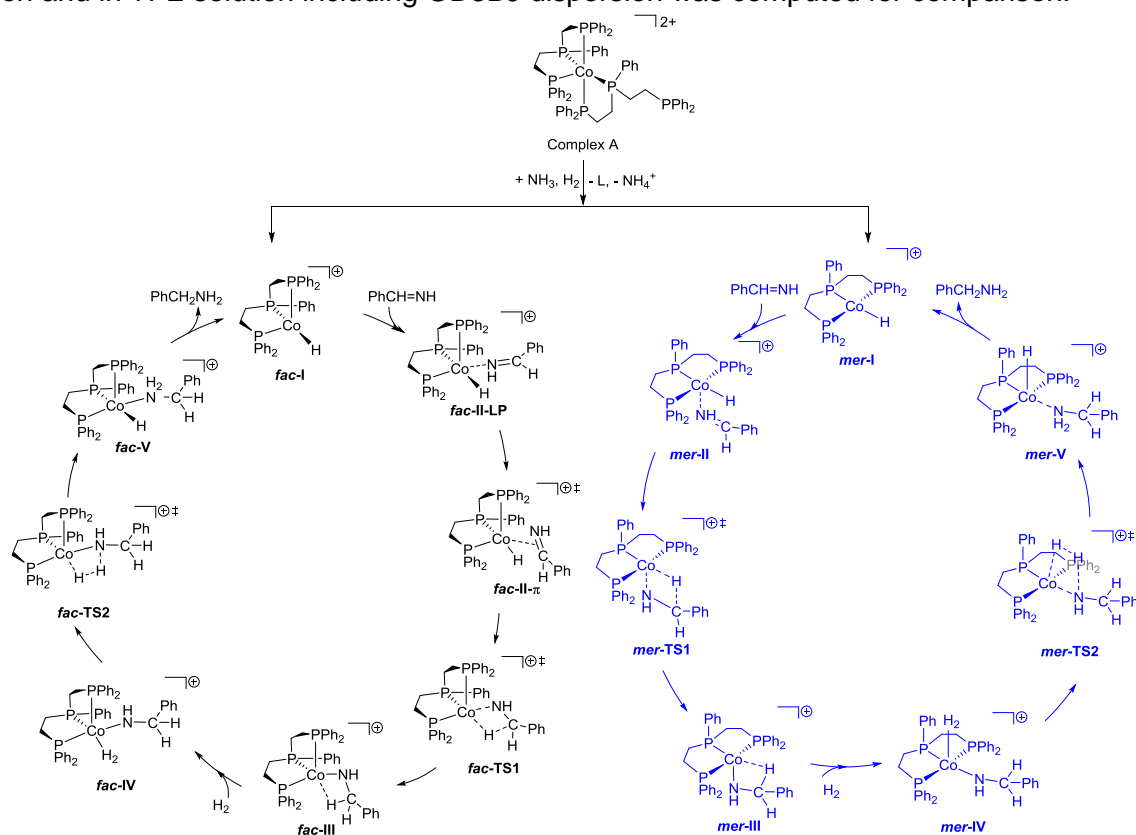

**Supplementary Figure 5.** Proposed mechanism for Ph-CH=NH hydrogenation by using  $[L7CoH]^+$  as active catalyst through the *fac*- and *mer*-route.

Cationic hydride  $[L7CoH]^+$  catalyzed cycle in gas phase (Supplementary Figure 6): As shown in Supplementary Figure 5, the proposed active catalyst has two conformations, i.e.; **mer-I** and **fac-I**; and therefore we computed the reaction mechanisms using both conformers. In gas phase, complex **mer-I** is more stable than complex **fac-I** by 31 kJ/mol. Starting from the **mer-I**, the coordination of Ph-CH=NH to form the  $\sigma$ -complex is endergonic by 1 kJ/mol for **mer-II-LP**, while exergonic by 4 kJ/mol for **fac-II-LP**. The formation of  $\pi$ -complex **fac-II- $\pi$**  is endergonic by 40 kJ/mol, while **mer-II- $\pi$**  could not be located. The Gibbs free energy barrier of Ph-CH=NH insertion into **I** is 112 and 39 kJ/mol for **mer-TS1** and **fac-TS1**, respectively. Thus, the Ph-CH=NH insertion into **I** from  $\pi$ -complex **fac-II- $\pi$**  is barrier-less. The formation of intermediate **III** with agostic interaction is endergonic by 108 and 24 kJ/mol for **mer-III** and **fac-III**, respectively.



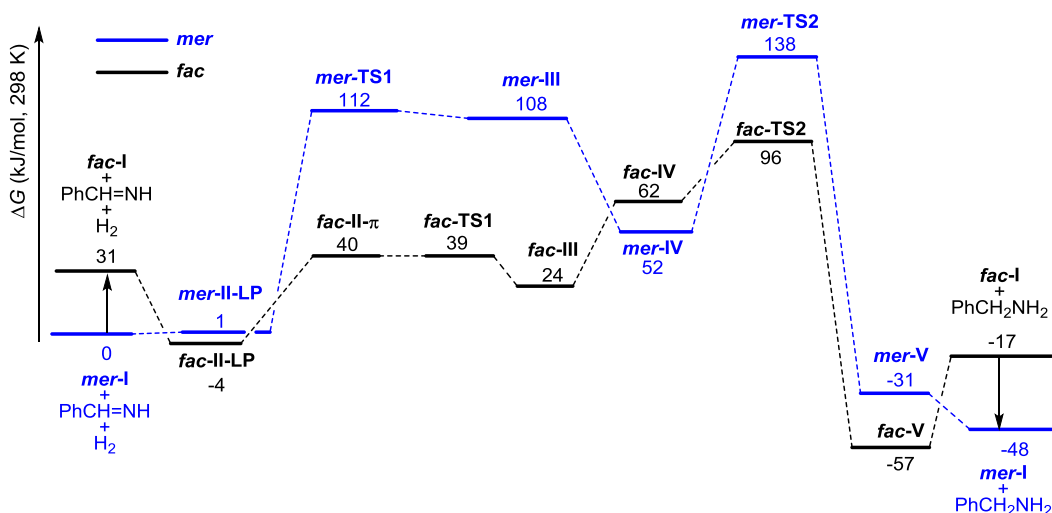

**Supplementary Figure 6.** Gibbs free energy surface for Ph-CH=NH hydrogenation by using  $[L7CoH]^+$  as catalyst through *fac*- and *mer*-route in gas phase at B3PW91/TZVP level.

In the second step,  $H_2$  coordination to form **IV** is endergonic by 52 and 62 kJ/mol for *mer-IV* and *fac-IV*, respectively. The final step of  $H_2$  metathesis has Gibbs free energy barrier of 138 and 96 kJ/mol for *mer-TS2* and *fac-TS2*, respectively. The formation of **V** is exergonic by 31 and 57 kJ/mol for *mer-V* and *fac-V*, respectively. The release of amine from complex *mer-V* and *fac-V* with the regeneration of *mer-I* is exergonic by 48 kJ/mol. The transition state of  $H_2$  metathesis represents the highest point on the Gibbs free energy surface and is therefore rate-determining transition state. On the basis of whole Gibbs free energy surface, the apparent Gibbs free energy barrier is 96 kJ/mol and 138 kJ/mol for *fac*- and *mer*-route, respectively. Under the consideration of the isomerization of both conformers and the Curtin–Hammett principle which states that for a reaction with two active intermediate under rapid equilibrium interconversion with low barrier and each intermediate has its own rate-determining transition state, the energy difference of the two rate-determining transition states rather than the equilibrium distribution of the two intermediates determines the product distribution (or selectivity), it is therefore to conclude that the *fac*-route with lower apparent barrier is more preferred kinetically.

Cationic hydride  $[L7CoH]^+$  catalyzed cycle in TFE solution (Supplementary Figure 7): As shown in Supplementary Figure 7, the potential free energy surfaces in gas phase and in solution are very similar. In TFE solution, complex **mer-I** is more stable than complex **fac-I** by 33 kJ/mol. Starting from the **mer-I**, the coordination of Ph-CH=NH to form the  $\sigma$ -complex is endergonic by 28 and 32 kJ/mol for **mer-II-LP** and **fac-II-LP**, respectively. The formation of  $\pi$ -complex **fac-II- $\pi$**  is endergonic by 72 kJ/mol. The Gibbs free energy barrier of Ph-CH=NH insertion into **I** is 130 and 71 kJ/mol for **mer-TS1** and **fac-TS1**, respectively. The formation of intermediate **III** with agostic interaction is endergonic by 121 and 50 kJ/mol for **mer-III** and **fac-III**, respectively.

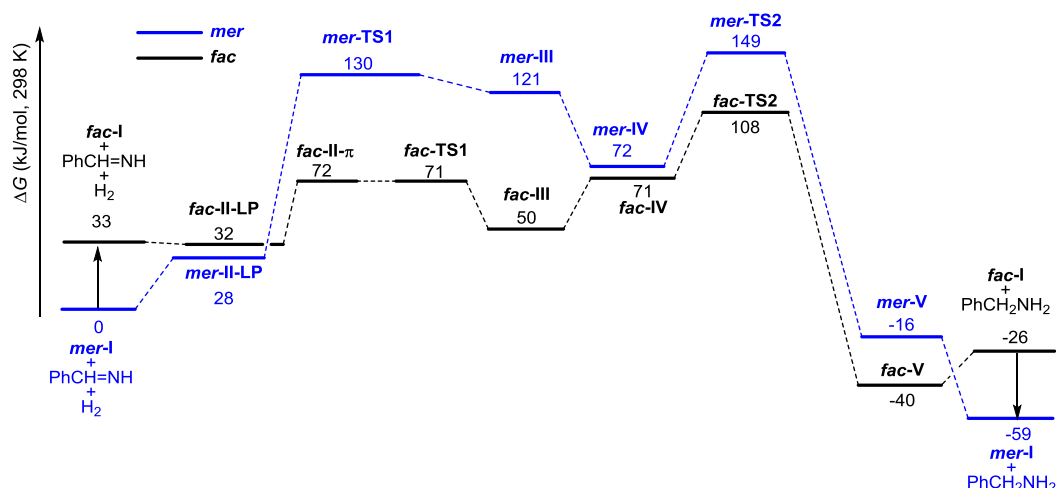

**Supplementary Figure 7.** Gibbs free energy surface for Ph-CH=NH hydrogenation by using  $[L7CoH]^+$  as catalyst through **fac**- and **mer**-route in TFE at B3PW91-SMD/Def2-TZVP//B3PW91/TZVP level.

In the second step,  $H_2$  coordination to form **IV** is exergonic by 72 and 71 kJ/mol for **mer-IV** and **fac-IV**, respectively. The final step of  $H_2$  metathesis has Gibbs free energy barrier of 149 and 108 kJ/mol for **mer-TS2** and **fac-TS2**, respectively. The formation of **V** is exergonic by 16 and 40 kJ/mol for **mer-V** and **fac-V**, respectively. The release of amine from complex **mer-V** and **fac-V** with the regeneration of **mer-I** is exergonic 59 kJ/mol. Similar as in gas phase, the transition state of  $H_2$  metathesis represents the highest point on the Gibbs free energy surface and is therefore rate-determining transition state. On the basis of whole Gibbs free energy surface, the apparent Gibbs free energy barrier is 108 and 149 kJ/mol for **fac**- and **mer**-route, respectively. Therefore, the **fac**-route is more favored kinetically.

Cationic hydride  $[L7CoH]^+$  catalyzed cycle in TFE solution with dispersion (Supplementary Figure 8): Furthermore, the dispersion energies have been included by single point calculation. As shown in Supplementary Figure 8, the potential free energy surfaces in solution including dispersion correction shows the same trend and shape as found in gas phase and in solution, but they differ quantitatively in numbers.

It is found that the **mer-I** is more stable than the **fac-I** by 22 kJ/mol, and the **fac**-route has lower apparent barrier than **mer**-route (29 vs. 65 kJ/mol). This agrees qualitatively with the results in Supplementary Figure 6; but they differ quantitatively, especially in the rate-determining energy, i.e.; from 108 kJ/mol without dispersion correction to 29 kJ/mol with dispersion correction. On the basis of the applied reaction conditions (100-120°C, 40 bar H<sub>2</sub> and 15-24 h reaction time), GD3BJ correction underestimates extremely the barriers and that without dispersion correction is very reasonably.

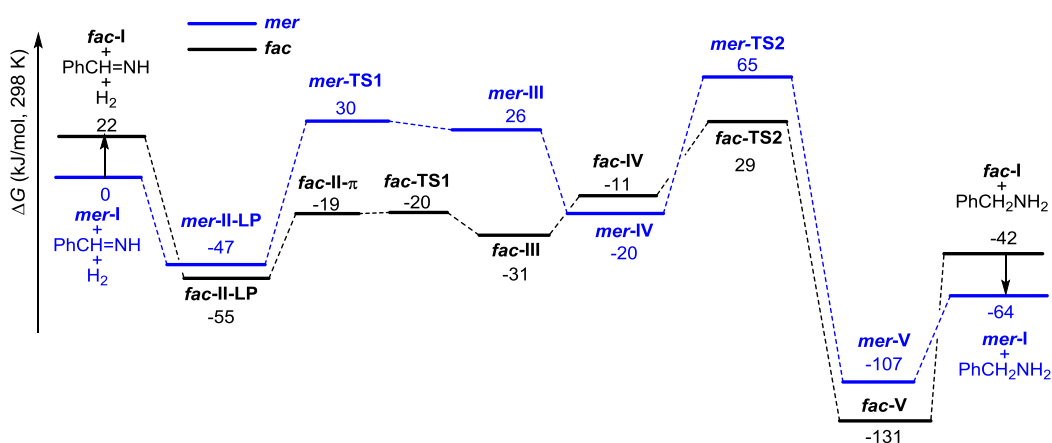

**Supplementary Figure 8.** Gibbs free energy surface for Ph-CH=NH hydrogenation by using [L7CoH]<sup>+</sup> as catalyst through **fac**- and **mer**-route in TFE with GD3BJ dispersion at B3PW91-SMD-D3/Def2-TZVP//B3PW91/TZVP level.

Di-cationic  $[L7Co(H)_2]^{2+}$  as active catalyst: Alternatively, we computed the di-cationic complex from the dissociation of one ligand and the addition of one  $H_2$  in gas phase, in TFE solution with and without GD3BJ dispersion. As shown in Supplementary Figure 9, the proposed active catalyst has two conformations, i.e.; **mer-I** and **fac-I**; and therefore we computed the reaction mechanisms using both conformers.

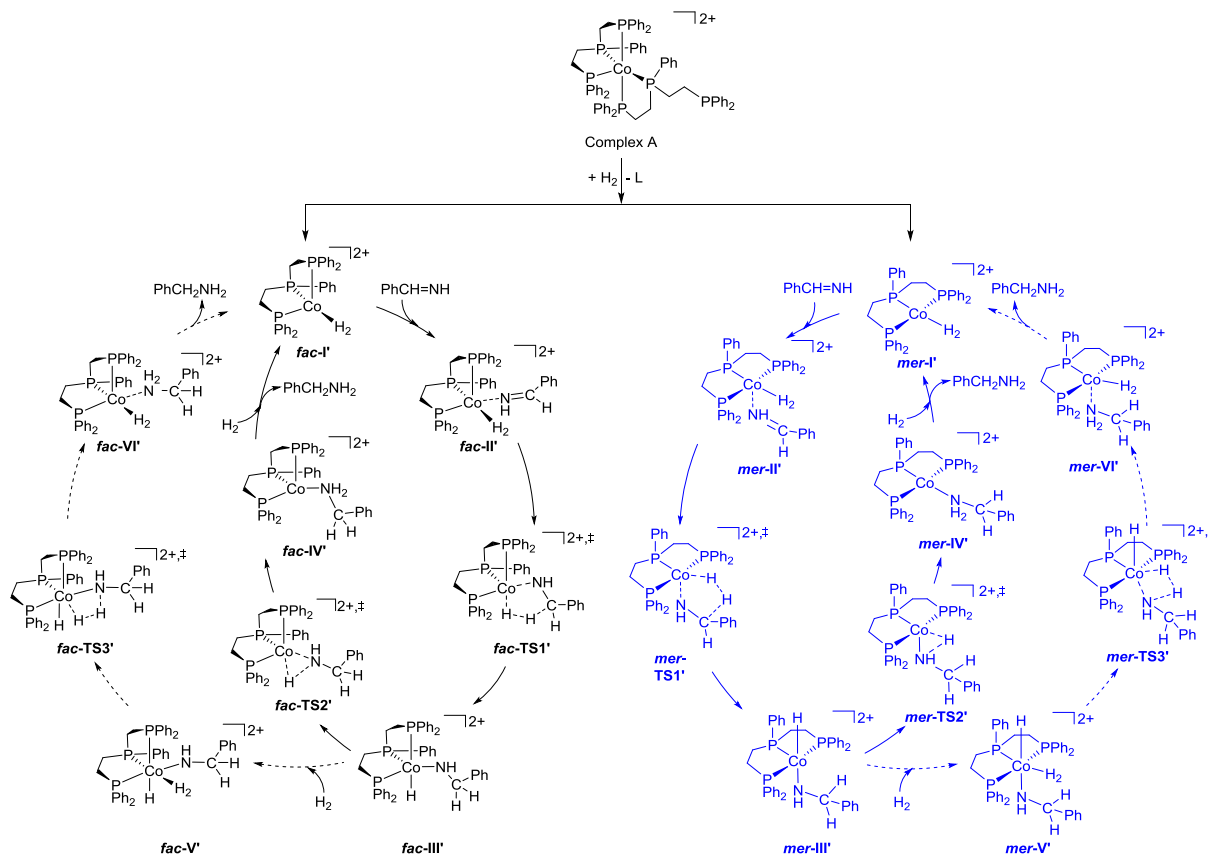

**Supplementary Figure 9.** Proposed reaction mechanism for for Ph-CH=NH hydrogenation by using  $[L7Co(H)_2]^{2+}$  as active catalyst through the *fac* and *mer* routes.

Di-cationic  $[L7Co(H)_2]^{2+}$  catalyzed cycle in gas phase (Supplementary Figure 10): Starting from **mer-[L7Co]<sup>2+</sup>**,  $H_2$  coordination to form di-cationic  $[L7Co(H)_2]^{2+}$  **I'** complex is exergonic by 24 kJ/mol for **mer-I'**, while endergonic by 23 kJ/mol for **fac-I'**. Therefore, we used **mer-I'** as reference and both **fac-I'** and **mer-I'** based catalytic cycles were calculated.

Starting from the **mer-I'**, the coordination of Ph-CH=NH to form the  $\sigma$ -complex **II'** is exergonic by 10 and 42 kJ/mol for **mer-I'** and **fac-I'**, respectively. The Gibbs free energy barrier of Ph-CH=NH insertion into **II'** is 170 and 128 kJ/mol for **mer-** and **fac-**route, respectively. The formation of intermediate **III'** is endergonic by 76 and 104 kJ/mol for **mer-III'** and **fac-III'**, respectively.

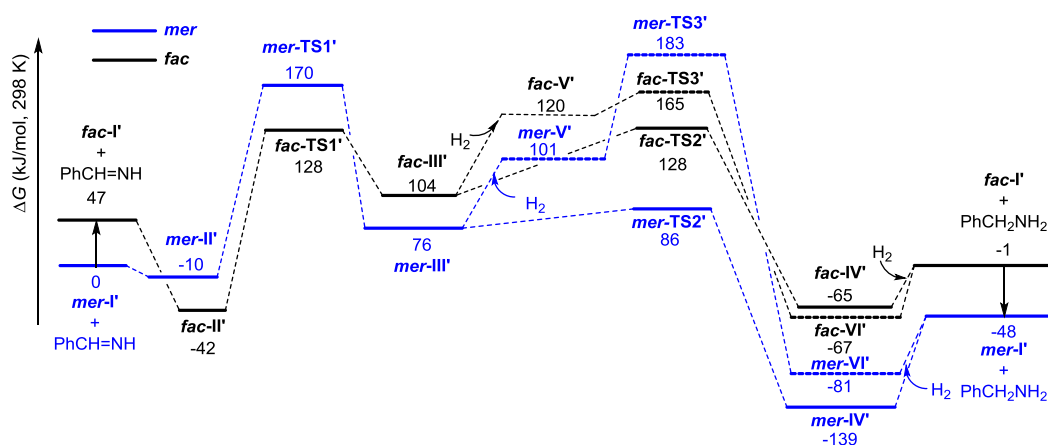

**Supplementary Figure 10.** Gibbs free energy surface for Ph-CH=NH hydrogenation by using  $[L7CoH_2]^{2+}$  as catalyst through *fac*- and *mer*-route in gas phase at B3PW91/TZVP level

In the second step, the  $PhCH_2NH_2$  can be generated through either the direct route of reductive elimination or the metathesis of the second molecular of  $H_2$ . For the direct reductive elimination route, the reductive elimination through transition state of **TS2'** has an energy barrier of 86 and 128 kJ/mol for *mer* and *fac*-route, respectively. The formation of amine complex **IV'** is exergonic by 139 and 65 kJ/mol for *mer-IV'* and *fac-IV'*, respectively. The release of  $PhCH_2NH_2$  from complex **IV'** and coordination of  $H_2$  with the regeneration of *mer-I'* is exergonic by 48 kJ/mol.

For the  $H_2$  metathesis route, the  $H_2$  coordination to the amine intermediate to form **V'** is endergonic by 101 and 120 kJ/mol for *mer-V'* and *fac-V'*. The final step of  $H_2$  metathesis has Gibbs free energy barrier of 183 and 165 kJ/mol for *mer-TS3'* and *fac-TS3'*, respectively. The formation of amine complex **VI'** is exergonic by 81 and 67 kJ/mol for *mer-VI'* and *fac-VI'*, respectively. The release of amine from complex **VI'** with the regeneration of *mer-I'* is endergonic by 48 kJ/mol. Therefore, the direct reductive elimination route is more favorable than the  $H_2$  metathesis route. The transition state of the first step represents the highest point on the Gibbs free energy surface and the apparent Gibbs free energy barrier is 170 and 128 kJ/mol for *mer*- and *fac*-route, respectively. It is noted that these barriers are much higher than those of the mono-cationic complex by 32 kJ/mol; and such di-cationic routes are unlikely.

Di-cationic  $[L7Co(H_2)]^{2+}$  catalyzed cycle in TFE (Supplementary Figure 11): Nevertheless, the di-cationic routes in solution have been also computed for comparison. Starting from *mer-[L7Co]*<sup>2+</sup>,  $H_2$  coordination is exergonic by 5 kJ/mol for *mer-I'*, while endergonic by 47 kJ/mol for *fac-I'*. Similar as in gas phase, we also use *mer-I'* as reference and both *fac-I'* and *mer-I'* based catalytic cycles were calculated.

Starting from the *mer-I'*, the coordination of Ph-CH=NH to form the  $\sigma$ -complex **II'** is endergonic by 56 and 35 kJ/mol for *mer-II'* and *fac-II'*, respectively. The Gibbs free energy barrier of Ph-CH=NH insertion into **II'** is 248 and 200 kJ/mol for *mer*- and *fac*-route, respectively. The formation of intermediate **III'** is endergonic by 144 and 176 kJ/mol for *mer-II'* and *fac-II'*, respectively.

In the second step, the  $\text{PhCH}_2\text{NH}_2$  can be directly generated through either the reductive elimination or metathesis of the second molecular of  $\text{H}_2$ . For the direct route, the reductive elimination through transition state of **TS2'** has an energy barrier of 154 and 212 kJ/mol for *mer* and *fac* route, respectively. The formation of amine complex **IV'** is exergonic by 89 and 6 kJ/mol for *mer-IV'* and *fac-IV'*, respectively. The release of  $\text{PhCH}_2\text{NH}_2$  from complex **IV'** and coordination of  $\text{H}_2$  with the regeneration of *mer-I'* is exergonic by 59 kJ/mol. For the  $\text{H}_2$  metathesis route, the  $\text{H}_2$  coordination to the amine intermediate to form **V'** is endergonic by 158 and 180 kJ/mol for *mer-V'* and *fac-V'*, respectively. The final step of hydrogenolysis has Gibbs free energy barrier of 242 and 236 kJ/mol for *mer-TS3'* and *fac-TS3'*, respectively. The formation of amine complex **VI'** is exergonic by 29 and 23 kJ/mol for *mer-VI'* and *fac-VI'*, respectively. The release of amine from complex **VI'** with the regeneration of *mer-I'* is exergonic by 59 kJ/mol. In TFE solution, the direct route is more favorable than the  $\text{H}_2$  metathesis route, and the apparent Gibbs free energy barrier is 248 and 212 kJ/mol for *mer*- and *fac*-route, respectively. It is noted that these barriers are much higher than those of the mono-cationic complex by more than 100 kJ/mol and can be ruled out.

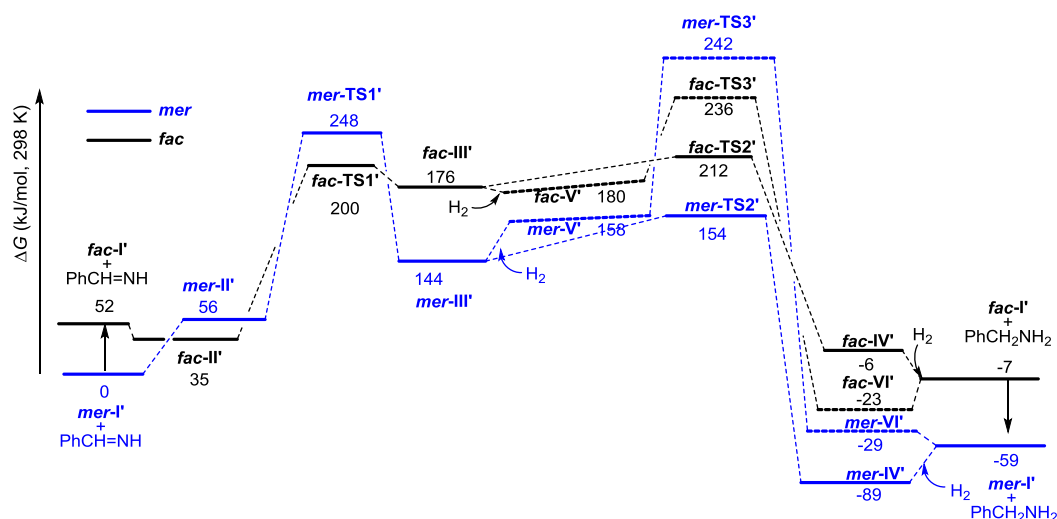

**Supplementary Figure 11.** Gibbs free energy surface for  $\text{Ph-CH=NH}$  hydrogenation by using  $[\text{L7Co}^{\text{II}}-\text{H}_2]^{2+}$  as catalyst through *fac*- and *mer*-route in TFE at B3PW91-SMD/Def2-TZVP//B3PW91/TZVP level.

Di-cationic  $[\text{L7Co}^{\text{II}}-\text{H}_2]^{2+}$  catalyzed cycle in TFE with GD3BJ dispersion (Supplementary Figure 12): Nevertheless, we included dispersion correction (GD3BJ) in the di-cationic cycle (Supplementary Figure 12). Although both potential energy surfaces are similar, but they differ quantitatively, especially in the apparent barriers, i.e.; dispersion correction lowers the barrier by 90 kJ/mol for *fac*-route. However, these barriers are still much higher than that of mon-ocationic route by 93 kJ/mol for *fac*-route.

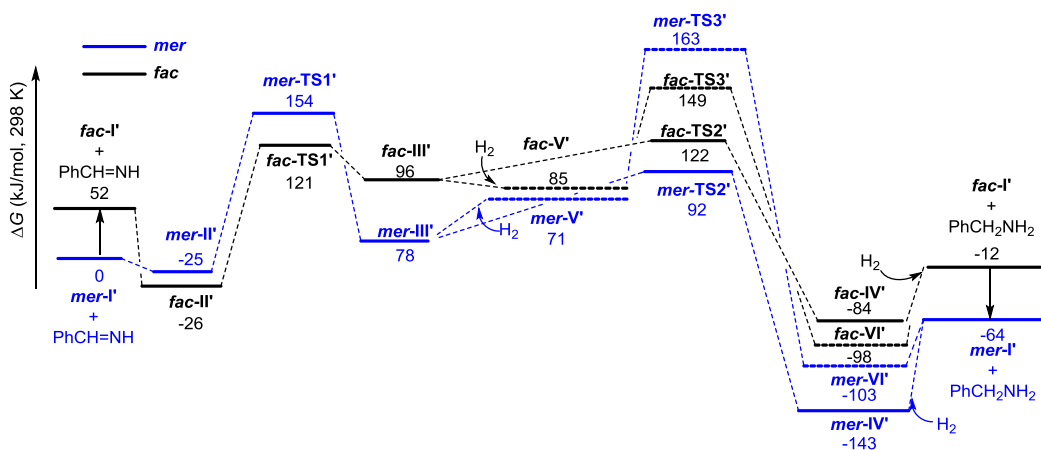

**Supplementary Figure 12.** Gibbs free energy surface for Ph-CH=NH hydrogenation by using  $[L7Co(H_2)]^{2+}$  as catalyst through *fac*- and *mer*-route in TFE with GD3BJ dispersion at B3PW91-SMD-D3/Def2-TZVP//B3PW91/TZVP level.

All these show that the di-cationic route is unlikely and can be discarded. On the basis of the applied reaction conditions (100-120°C, 40 bar  $H_2$  and 15-24 h reaction time), the result with GD3BJ correction is extremely underestimated, and that without dispersion correction is very reasonably.

**Supplementary Table 6.** Computed total energies (au), enthalpy and free energy correction (au, 298 K) in gas phase at B3PW91/TZVP level as well as single-point total energies in TFE solution without (B3PW91-SMD/Def2-TZVP//B3PW91/TZVP) and with dispersion correction (B3PW91-SMD-D3/Def2-TZVP//B3PW91/TZVP)

|                                                                                                       | E (B3PW91)                                                | H (298.15)   | G (298.15)   | E (B3PW91-SMD) | E(B3PW91-SMD-D3) |
|-------------------------------------------------------------------------------------------------------|-----------------------------------------------------------|--------------|--------------|----------------|------------------|
| <b>H<sub>2</sub></b>                                                                                  | -1.178635<br>ZEP=0.010064                                 | -1.165267    | -1.180065    | -1.1760136     | -1.1761507       |
| <b>PhCHNH</b>                                                                                         | -325.672112<br>ZPE= 0.122318                              | -325.542363  | -325.580491  | -325.6925958   | -325.7188601     |
| <b>PhCH<sub>2</sub>NH<sub>2</sub></b>                                                                 | -326.893012<br>ZPE= 0.145907                              | -326.738958  | -326.778881  | -326.9119766   | -326.9404524     |
| 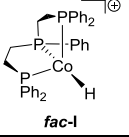<br><b>fac-I</b>     | -3722.608459<br>ZPE= 0.581492                             | -3721.989757 | -3722.101071 | -3722.764375   | -3722.990356     |
| <br><b>fac-II</b>    | -4048.319178<br>ZPE= 0.706932                             | -4047.56758  | -4047.695044 | -4048.478273   | -4048.760476     |
| <br><b>fac-IIπ</b>   | -4048.302943<br>ZPE= 0.706337                             | -4047.551964 | -4047.678325 | -4048.46373    | -4048.747175     |
| <br><b>fac-TS1</b>  | -4048.302818<br>NImag = 1<br>(-269.2732)<br>ZPE= 0.705561 | -4047.553118 | -4047.678577 | -4048.46391    | -4048.747293     |
| <br><b>fac-III</b> | -4048.310216<br>ZPE= 0.708453                             | -4047.557395 | -4047.684535 | -4048.473294   | -4048.753119     |
| <br><b>fac-IV</b>  | -4049.493227<br>ZPE= 0.726734                             | -4048.721026 | -4048.849953 | -4049.657233   | -4049.937379     |
| <br><b>fac-TS2</b> | -4049.476194<br>NImag = 1<br>(-1074.276)<br>ZPE= 0.724539 | -4048.706423 | -4048.83689  | -4049.639005   | -4049.918162     |
| <br><b>fac-V</b>   | -4049.539322<br>ZPE= 0.730649                             | -4048.763122 | -4048.895347 | -4049.700409   | -4049.983921     |
| <br><b>mer-I</b>   | -3722.621223<br>ZPE= 0.581333                             | -3722.003702 | -3722.112995 | -3722.776849   | -3722.999503     |
| <br><b>mer-II</b>  | -4048.313283<br>ZPE= 0.705403                             | -4047.562847 | -4047.693005 | -4048.476241   | -4048.753658     |



|  |                                                           |              |              |              |              |
|--|-----------------------------------------------------------|--------------|--------------|--------------|--------------|
|  | -4048.276617<br>NImag = 1<br>(-550.8865)<br>ZPE= 0.70575  | -4047.527011 | -4047.650746 | -4048.442854 | -4048.72985  |
|  | -4048.278815<br>ZPE= 0.707909                             | -4047.526748 | -4047.652172 | -4048.446966 | -4048.73243  |
|  | -4049.495158<br>ZPE= 0.726195                             | -4048.723408 | -4048.853718 | -4049.655023 | -4049.939281 |
|  | -4049.46281<br>NImag = 1<br>(-428.622)<br>ZPE= 0.725517   | -4048.69229  | -4048.821171 | -4049.62604  | -4049.906983 |
|  | -4049.531299<br>ZPE= 0.730363                             | -4048.755594 | -4048.885368 | -4049.692908 | -4049.976893 |
|  | -3721.687621<br>ZPE= 0.573398                             | -3721.078652 | -3721.185945 | -3722.016732 | -3722.237035 |
|  | -3722.893052<br>ZPE= 0.590774                             | -3722.26431  | -3722.37703  | -3723.207984 | -3723.438305 |
|  | -4048.622782<br>ZPE= 0.716541                             | -4047.860737 | -4047.991438 | -4048.927496 | -4049.207308 |
|  | -4048.558113<br>NImag = 1<br>(-783.6629)<br>ZPE= 0.712849 | -4047.80057  | -4047.926839 | -4048.864612 | -4049.151449 |
|  | -4048.571601<br>ZPE= 0.718514                             | -4047.80831  | -4047.935861 | -4048.878149 | -4049.165413 |
|  | -4048.55908<br>NImag = 1<br>(-1039.2811)<br>ZPE= 0.716868 | -4047.797497 | -4047.926664 | -4048.861183 | -4049.152144 |
|  | -4048.640422<br>ZPE= 0.723941                             | -4047.871356 | -4048.000142 | -4048.952259 | -4049.238638 |

|                                                                                     |                                                            |              |              |              |              |
|-------------------------------------------------------------------------------------|------------------------------------------------------------|--------------|--------------|--------------|--------------|
| 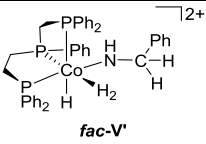   | -4049.765492<br>ZPE= 0.737105                              | -4048.983446 | -4049.10977  | -4050.071271 | -4050.364214 |
|    | -4049.74176<br>NImag = 1<br>(-1631.6038)<br>ZPE= 0.733016  | -4048.96368  | -4049.092576 | -4050.043258 | -4050.333326 |
|    | -4049.837067<br>ZPE= 0.740871                              | -4049.050299 | -4049.181257 | -4050.148618 | -4050.434024 |
|    | -3721.70554<br>ZPE= 0.574096                               | -3721.094497 | -3721.205948 | -3722.034983 | -3722.258357 |
|    | -3722.912552<br>ZPE= 0.591451                              | -3722.283629 | -3722.39503  | -3723.229184 | -3723.459504 |
|   | -4048.613953<br>ZPE= 0.716863                              | -4047.851941 | -4047.979482 | -4048.922719 | -4049.210212 |
|  | -4048.542301<br>NImag = 1<br>(-936.241)<br>ZPE= 0.713021   | -4047.784879 | -4047.910597 | -4048.846926 | -4049.139242 |
|  | -4048.581321<br>ZPE= 0.718141                              | -4047.818248 | -4047.946711 | -4048.889566 | -4049.170999 |
|  | -4048.576581<br>NImag = 1<br>(-743.6983)<br>ZPE= 0.716974  | -4047.814912 | -4047.942871 | -4048.88478  | -4049.164912 |
|  | -4048.667635<br>ZPE= 0.724234                              | -4047.898377 | -4048.028576 | -4048.982473 | -4049.259786 |
|  | -4049.767609<br>ZPE= 0.73514                               | -4048.986855 | -4049.117084 | -4050.074248 | -4050.364338 |
|  | -4049.736521<br>NImag = 1<br>(-1680.3716)<br>ZPE= 0.733173 | -4048.958439 | -4049.085808 | -4050.042746 | -4050.329564 |

|                                                                                                         |                                     |                     |                     |                     |                     |
|---------------------------------------------------------------------------------------------------------|-------------------------------------|---------------------|---------------------|---------------------|---------------------|
| 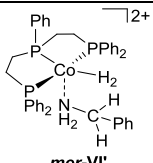 <p><i>mer-VI'</i></p> | <p>-4049.84419<br/>ZPE= 0.74083</p> | <p>-4049.057604</p> | <p>-4049.186566</p> | <p>-4050.152587</p> | <p>-4050.437748</p> |
|---------------------------------------------------------------------------------------------------------|-------------------------------------|---------------------|---------------------|---------------------|---------------------|

## NMR Data

### p-tolylmethanamine hydrochloride

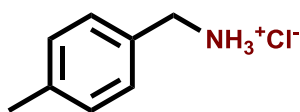

$^1\text{H NMR}$  (400 MHz,  $\text{DMSO-}d_6$ )  $\delta$  8.61 (br s, 3H), 7.40 (d,  $J = 8.2$  Hz, 2H), 7.20 (d,  $J = 7.6$  Hz, 2H), 3.94 (s, 2H), 2.30 (s, 3H).  $^{13}\text{C NMR}$  (101 MHz,  $\text{DMSO-}d_6$ )  $\delta$  138.11 , 131.54 , 129.47 , 129.43 , 42.30 , 21.22 . **White solid.**

### (4-(tert-butyl)phenyl)methanamine hydrochloride

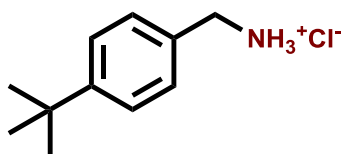

$^1\text{H NMR}$  (300 MHz,  $\text{DMSO-}d_6$ )  $\delta$  8.60 (br s, 3H), 7.52 – 7.30 (m, 4H), 3.95 (s, 2H), 1.27 (s, 9H).  $^{13}\text{C NMR}$  (75 MHz,  $\text{DMSO-}d_6$ )  $\delta$  151.32 , 131.63 , 129.25 , 125.72 , 42.22 , 34.79 , 31.54 . **White solid.**

### (4-methoxyphenyl)methanamine hydrochloride

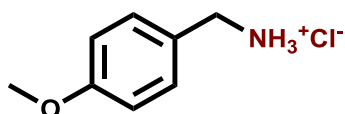

$^1\text{H NMR}$  (400 MHz,  $\text{DMSO-}d_6$ )  $\delta$  8.56 (br s, 3H), 7.45 (d,  $J = 8.8$  Hz, 2H), 6.95 (d,  $J = 8.7$  Hz, 2H), 3.92 (s, 2H), 3.75 (s, 3H).  $^{13}\text{C NMR}$  (101 MHz,  $\text{DMSO-}d_6$ )  $\delta$  159.74 , 131.03 , 126.47 , 114.31 , 55.65 , 42.04 . **White solid.**

### (3,4,5-trimethoxyphenyl)methanamine hydrochloride

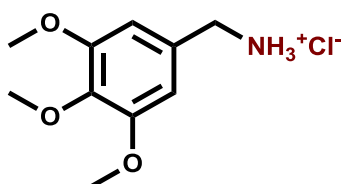

$^1\text{H NMR}$  (400 MHz,  $\text{DMSO-}d_6$ )  $\delta$  8.68 (br s, 3H), 6.97 (s, 2H), 3.93 (s, 2H), 3.78 (s, 6H), 3.65 (s, 3H).  $^{13}\text{C NMR}$  (101 MHz,  $\text{DMSO-}d_6$ )  $\delta$  153.22 , 137.70 , 130.08 , 107.04 , 60.46 , 56.48 , 42.83 . **Off white solid.**

### (4-fluorophenyl)methanamine hydrochloride

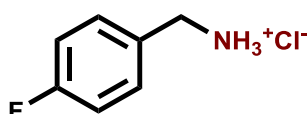

$^1\text{H NMR}$  (400 MHz,  $\text{DMSO-}d_6$ )  $\delta$  8.68 (br s, 3H), 7.75 – 7.44 (m, 2H), 7.41 – 7.01 (m, 2H), 3.99 (s, 2H).  $^{13}\text{C NMR}$  (101 MHz,  $\text{DMSO-}d_6$ )  $\delta$  162.49 (d,  $J = 244.5$  Hz), 131.87 (d,  $J = 8.4$  Hz), 130.88 (d,

$J = 3.1$  Hz), 115.75 (d,  $J = 21.5$  Hz), 41.78 .  $^{19}\text{F}$  NMR (282 MHz,  $\text{DMSO-}d_6$ )  $\delta$  -113.77 . **White solid.**

**(4-(trifluoromethyl)phenyl)methanamine hydrochloride**

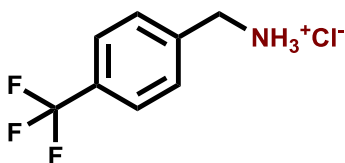

$^1\text{H}$  NMR (400 MHz,  $\text{DMSO-}d_6$ )  $\delta$  8.81 (br s, 3H), 7.96 – 7.56 (m, 4H), 4.13 (s, 2H).  $^{13}\text{C}$  NMR (101 MHz,  $\text{DMSO-}d_6$ )  $\delta$  139.30 , 130.27 , 129.26 (q,  $J = 31.9$  Hz), 125.74 (q,  $J = 3.7$  Hz), 124.58 (q,  $J = 272.2$  Hz), 41.99 .  $^{19}\text{F}$  NMR (282 MHz,  $\text{DMSO-}d_6$ )  $\delta$  -61.14 . **White solid.**

**(4-chlorophenyl)methanamine hydrochloride**

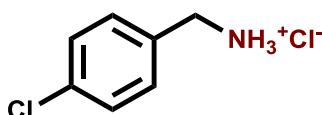

$^1\text{H}$  NMR (400 MHz,  $\text{DMSO-}d_6$ )  $\delta$  8.72 (br s, 3H), 7.60 – 7.53 (m, 2H), 7.51 – 7.45 (m, 2H), 4.01 (s, 2H).  $^{13}\text{C}$  NMR (101 MHz,  $\text{DMSO-}d_6$ )  $\delta$  133.59 , 133.52 , 131.50 , 128.90 , 41.81 . **White solid.**

**(4-(trifluoromethoxy)phenyl)methanamine hydrochloride**

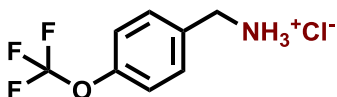

$^1\text{H}$  NMR (300 MHz,  $\text{DMSO-}d_6$ )  $\delta$  8.70 (br s, 3H), 7.69 (d,  $J = 8.7$  Hz, 2H), 7.41 (d,  $J = 7.8$  Hz, 2H), 4.05 (s, 2H).  $^{13}\text{C}$  NMR (75 MHz,  $\text{DMSO-}d_6$ )  $\delta$  148.70 , 134.07 , 131.67 , 121.52 , 120.48 (q,  $J = 256.3$  Hz), 41.76 .  $^{19}\text{F}$  NMR (282 MHz,  $\text{DMSO-}d_6$ )  $\delta$  -56.91 . **Off white solid.**

**naphthalen-1-ylmethanamine hydrochloride**

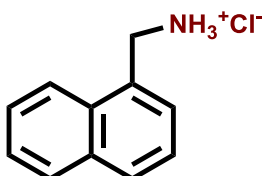

$^1\text{H}$  NMR (400 MHz,  $\text{DMSO-}d_6$ )  $\delta$  8.79 (br s, 3H), 8.26 – 8.09 (m, 1H), 8.07 – 7.90 (m, 2H), 7.77 – 7.48 (m, 4H), 4.51 (s, 2H).  $^{13}\text{C}$  NMR (101 MHz,  $\text{DMSO-}d_6$ )  $\delta$  133.65 , 131.12 , 130.46 , 129.43 , 129.08 , 127.72 , 127.19 , 126.66 , 125.81 , 123.95 , 40.61 . **Pale brown solid.**

**(3-hydroxy-4-methoxyphenyl)methanamine hydrochloride**

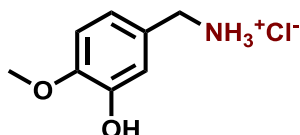

$^1\text{H NMR}$  (400 MHz,  $\text{DMSO-}d_6$ )  $\delta$  8.49 (br s, 3H), 7.21 – 6.63 (m, 3H), 3.90 (s, 2H), 3.81 (s, 3H).  $^{13}\text{C NMR}$  (101 MHz,  $\text{DMSO-}d_6$ )  $\delta$  148.27 , 146.87 , 126.82 , 120.45 , 116.84 , 112.51 , 56.15 , 42.32 .  
Brown solid.

**(4-(methylthio)phenyl)methanamine hydrochloride**

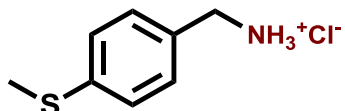

$^1\text{H NMR}$  (400 MHz,  $\text{DMSO-}d_6$ )  $\delta$  8.03 (br s, 3H), 7.46 (d,  $J = 8.3$  Hz, 2H), 7.27 (d,  $J = 8.3$  Hz, 2H), 3.95 (s, 2H), 2.46 (s, 3H).  $^{13}\text{C NMR}$  (101 MHz,  $\text{DMSO-}d_6$ )  $\delta$  138.95 , 130.92 , 130.17 , 126.21 , 42.11 , 15.13 . Brown solid.

**(E)-(4-styrylphenyl)methanamine hydrochloride**

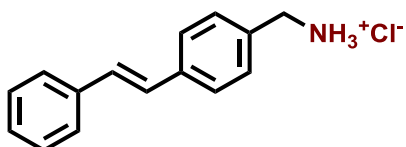

$^1\text{H NMR}$  (400 MHz,  $\text{DMSO-}d_6$ )  $\delta$  8.62 (br s, 3H), 7.72 – 7.57 (m, 4H), 7.53 (d,  $J = 7.9$  Hz, 2H), 7.45 – 7.32 (m, 3H), 7.33 – 7.20 (m, 2H), 4.00 (s, 2H).  $^{13}\text{C NMR}$  (101 MHz,  $\text{DMSO-}d_6$ )  $\delta$  137.59, 137.31, 133.76 , 129.86 , 129.45 , 129.40 , 129.20 , 128.26 , 128.22 , 127.00 , 42.37 . Yellow solid.

**(4-(benzyloxy)phenyl)methanamine hydrochloride**

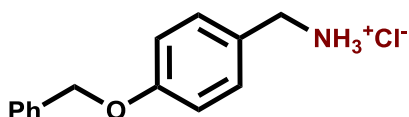

$^1\text{H NMR}$  (300 MHz,  $\text{DMSO-}d_6$ )  $\delta$  8.58 (br s, 3H), 7.48 – 7.27 (m, 7H), 7.02 (d,  $J = 8.7$  Hz, 2H), 5.12 (s, 2H), 3.91 (s, 2H).  $^{13}\text{C NMR}$  (75 MHz,  $\text{DMSO-}d_6$ )  $\delta$  158.74 , 137.41 , 131.06 , 128.90 , 128.29 , 128.08 , 126.70 , 115.23 , 69.61 , 42.03 . Off white solid.

**(4-(4,4,5,5-tetramethyl-1,3,2-dioxaborolan-2-yl)phenyl)methanamine hydrochloride**

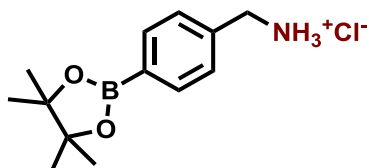

$^1\text{H NMR}$  (400 MHz,  $\text{DMSO-}d_6$ )  $\delta$  8.61 (br s, 3H), 7.69 (d,  $J = 7.9$  Hz, 2H), 7.52 (d,  $J = 8.0$  Hz, 2H), 4.02 (s, 2H), 1.30 (s, 12H).  $^{13}\text{C NMR}$  (101 MHz,  $\text{DMSO-}d_6$ )  $\delta$  137.85 , 134.96 , 129.42 , 128.77 , 84.22 , 42.50 , 25.13 . White solid.

**benzo[d][1,3]dioxol-5-ylmethanamine hydrochloride**

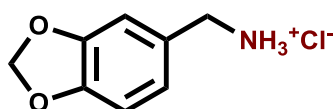

$^1\text{H NMR}$  (400 MHz,  $\text{DMSO-}d_6$ )  $\delta$  8.57 (s, 3H), 7.16 (dd,  $J = 1.7, 0.5$  Hz, 1H), 6.98 (dd,  $J = 8.0, 1.7$  Hz, 1H), 6.93 (dd,  $J = 8.0, 0.4$  Hz, 1H), 6.03 (s, 2H), 3.90 (s, 2H).

$^{13}\text{C NMR}$  (101 MHz,  $\text{DMSO-}d_6$ )  $\delta$  147.69 , 147.67 , 128.17 , 123.35 , 109.99 , 108.65 , 101.63 , 42.37 . **Off white solid.**

**(2,3-dihydrobenzo[b][1,4]dioxin-6-yl)methanamine hydrochloride**

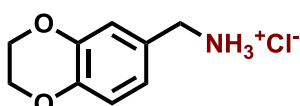

$^1\text{H NMR}$  (400 MHz,  $\text{DMSO-}d_6$ )  $\delta$  8.29 (br s, 3H), 7.07 (d,  $J = 2.1$  Hz, 1H), 6.96 (dd,  $J = 8.3, 2.1$  Hz, 1H), 6.85 (d,  $J = 8.2$  Hz, 1H), 4.23 (s, 4H), 3.86 (s, 2H).  $^{13}\text{C NMR}$  (101 MHz,  $\text{DMSO-}d_6$ )  $\delta$  143.91 , 143.57 , 127.45 , 122.54 , 118.40 , 117.45 , 64.56 , 64.52 , 42.05 . **Off white solid.**

**(benzo[d][1,3]dioxol-5-yl)-2-methylpropan-1-amine hydrochloride**

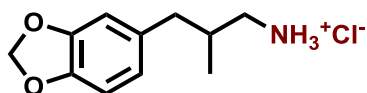

$^1\text{H NMR}$  (400 MHz,  $\text{DMSO-}d_6$ )  $\delta$  8.30 (br s, 3H), 6.88 – 6.72 (m, 2H), 6.63 (dd,  $J = 8.0, 1.6$  Hz, 1H), 5.95 (s, 2H), 2.77 – 2.54 (m, 3H), 2.28 (dd,  $J = 13.5, 8.3$  Hz, 1H), 2.08 – 1.96 (m, 1H), 0.85 (d,  $J = 6.6$  Hz, 3H).  $^{13}\text{C NMR}$  (101 MHz,  $\text{DMSO-}d_6$ )  $\delta$  147.58 , 145.86 , 133.85 , 122.38 , 109.74 , 108.43 , 101.13 , 44.25 , 39.72 , 33.72 , 17.31 . **Pale brown solid.**

**(4-((2-chloro-6-fluorobenzyl)oxy)-3-methoxyphenyl)methanamine hydrochloride**

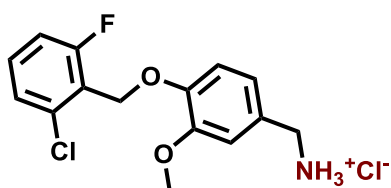

$^1\text{H NMR}$  (400 MHz,  $\text{DMSO-}d_6$ )  $\delta$  8.55 (br s, 3H), 7.56 – 7.46 (m, 1H), 7.42 (dd,  $J = 8.1, 1.2$  Hz, 1H), 7.35 – 7.27 (m, 2H), 7.13 (d,  $J = 8.2$  Hz, 1H), 7.03 (dd,  $J = 8.2, 2.0$  Hz, 1H), 5.13 (s, 2H), 3.95 (s, 2H), 3.75 (s, 3H).  $^{13}\text{C NMR}$  (101 MHz,  $\text{DMSO-}d_6$ )  $\delta$  161.94 (d,  $J = 250.0$  Hz), 149.53 , 148.10 , 136.00 (d,  $J = 5.2$  Hz), 132.29 (d,  $J = 9.9$  Hz), 127.92 , 126.18 (d,  $J = 3.2$  Hz), 122.49 (d,  $J = 17.9$  Hz), 121.85 , 115.23 (d,  $J = 22.4$  Hz), 114.14, 113.97, 62.16 , 56.08 , 42.47 .  $^{19}\text{F NMR}$  (282 MHz,  $\text{DMSO-}d_6$ )  $\delta$  -113.48 . **Off white solid.**

### [1,1'-biphenyl]-4-ylmethanamine hydrochloride

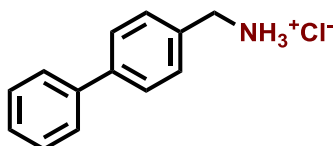

$^1\text{H NMR}$  (400 MHz,  $\text{DMSO-}d_6$ )  $\delta$  8.75 (br s, 3H), 7.74 – 7.61 (m, 6H), 7.50 – 7.43 (m, 2H), 7.41 – 7.33 (m, 1H), 4.06 (s, 2H).  $^{13}\text{C NMR}$  (101 MHz,  $\text{DMSO-}d_6$ )  $\delta$  140.59 , 139.99 , 133.74 , 130.12 , 129.45 , 128.12 , 127.19 , 127.14 , 42.26 . **Off white solid.**

### 3-(4-(tert-butyl)phenyl)-2-methylpropan-1-amine hydrochloride

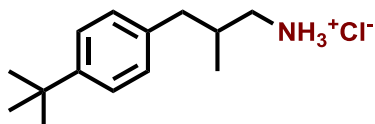

$^1\text{H NMR}$  (300 MHz,  $\text{DMSO-}d_6$ )  $\delta$  8.36 (br s, 3H), 7.34 (d,  $J = 8.2$  Hz, 2H), 7.17 (d,  $J = 8.2$  Hz, 2H), 2.85 – 2.60 (m, 3H), 2.39 (dd,  $J = 13.4, 8.3$  Hz, 1H), 2.20 – 2.03 (m, 1H), 1.29 (s, 9H), 0.92 (d,  $J = 6.6$  Hz, 3H).  $^{13}\text{C NMR}$  (75 MHz,  $\text{DMSO-}d_6$ )  $\delta$  148.65 , 136.95 , 129.16 , 125.39 , 49.06 , 44.38 , 34.50 , 33.54 , 31.65 , 17.46 . **Pale brown solid.**

### 2-phenylpropan-1-amine hydrochloride

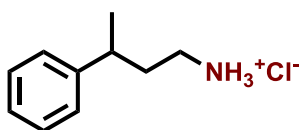

$^1\text{H NMR}$  (300 MHz,  $\text{DMSO-}d_6$ )  $\delta$  8.17 (br s, 3H), 7.47 – 7.03 (m, 5H), 3.71 – 3.62 (m, 1H), 2.88 – 2.74 (m, 1H), 2.74 – 2.62 (m, 1H), 1.86 (q,  $J = 7.7$  Hz, 2H), 1.18 (d,  $J = 6.9$  Hz, 3H).  $^{13}\text{C NMR}$  (75 MHz,  $\text{DMSO-}d_6$ )  $\delta$  146.28 , 128.93 , 127.24 , 126.69 , 37.79 , 36.84 , 35.44 , 22.49 . **Off white solid.**

### 1-(3-methoxyphenyl)ethan-1-amine hydrochloride

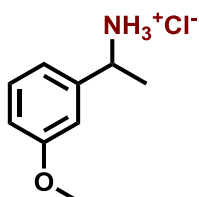

$^1\text{H NMR}$  (300 MHz,  $\text{DMSO-}d_6$ )  $\delta$  8.35 (br s, 3H), 7.37 – 7.25 (m, 1H), 7.23 (dd,  $J = 2.7, 1.6$  Hz, 1H), 7.14 – 7.04 (m, 1H), 6.91 (ddd,  $J = 8.3, 2.6, 0.9$  Hz, 1H), 4.33 (q,  $J = 6.8$  Hz, 1H), 3.77 (s, 3H), 1.52 (d,  $J = 6.7$  Hz, 3H).  $^{13}\text{C NMR}$  (75 MHz,  $\text{DMSO-}d_6$ )  $\delta$  159.85 , 141.55 , 130.18 , 119.34 , 114.19 , 113.05 , 55.70 , 50.48 , 21.37 . **White solid.**



### 1-(4-fluorophenyl)ethan-1-amine hydrochloride

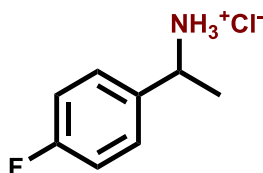

$^1\text{H NMR}$  (400 MHz,  $\text{DMSO-}d_6$ )  $\delta$  8.75 (br s, 3H), 7.77 – 7.47 (m, 2H), 7.37 – 7.01 (m, 2H), 4.46 – 4.35 (m, 1H), 1.52 (d,  $J = 6.8$  Hz, 3H).  $^{13}\text{C NMR}$  (101 MHz,  $\text{DMSO-}d_6$ )  $\delta$  162.34 (d,  $J = 244.4$  Hz), 136.19 (d,  $J = 3.0$  Hz), 129.71 (d,  $J = 8.3$  Hz), 115.85 (d,  $J = 21.4$  Hz), 49.80, 21.25.  $^{19}\text{F NMR}$  (282 MHz,  $\text{DMSO-}d_6$ )  $\delta$  -113.92. **Brown solid.**

### 1-(benzo[d][1,3]dioxol-5-yl)ethan-1-amine hydrochloride

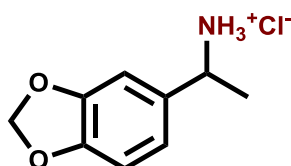

$^1\text{H NMR}$  (300 MHz,  $\text{DMSO-}d_6$ )  $\delta$  8.66 (br s, 3H), 7.21 (d,  $J = 1.7$  Hz, 1H), 7.00 (dd,  $J = 8.1, 1.7$  Hz, 1H), 6.91 (d,  $J = 8.0$  Hz, 1H), 6.02 (s, 2H), 4.50 – 4.09 (m, 1H), 1.49 (d,  $J = 6.7$  Hz, 3H).  $^{13}\text{C NMR}$  (75 MHz,  $\text{DMSO-}d_6$ )  $\delta$  147.82, 147.53, 133.69, 121.11, 108.65, 107.85, 101.64, 50.35, 21.29. **Off white solid.**

### 1-(4-(methylthio)phenyl)ethan-1-amine hydrochloride

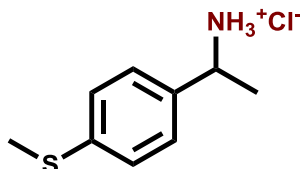

$^1\text{H NMR}$  (400 MHz,  $\text{DMSO-}d_6$ )  $\delta$  8.61 (br s, 3H), 7.49 (d,  $J = 8.0$  Hz, 2H), 7.29 (d,  $J = 8.0$  Hz, 2H), 4.53 – 4.20 (m, 1H), 2.47 (s, 3H), 1.51 (d,  $J = 6.5$  Hz, 3H).  $^{13}\text{C NMR}$  (101 MHz,  $\text{DMSO-}d_6$ )  $\delta$  138.87, 136.37, 128.06, 126.44, 50.09, 21.25, 15.28. **Brown solid.**

### 1-(4-(methylsulfonyl)phenyl)ethan-1-amine hydrochloride

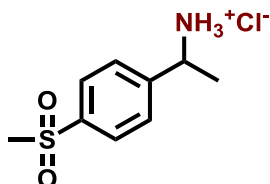

$^1\text{H NMR}$  (300 MHz,  $\text{DMSO-}d_6$ )  $\delta$  8.87 (br s, 3H), 7.98 (d,  $J = 8.5$  Hz, 2H), 7.84 (d,  $J = 8.4$  Hz, 2H), 4.67 – 4.28 (m, 1H), 3.24 (s, 3H), 1.55 (d,  $J = 6.8$  Hz, 3H).  $^{13}\text{C NMR}$  (75 MHz,  $\text{DMSO-}d_6$ )  $\delta$  145.49, 141.07, 128.45, 127.74, 50.04, 43.86, 21.12. **Pale brown solid.**

#### 4-(3-aminobutyl)phenol

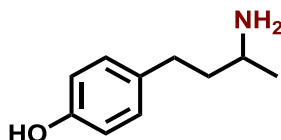

$^1\text{H NMR}$  (400 MHz,  $\text{DMSO-}d_6$ )  $\delta$  6.98 (d,  $J = 8.4$  Hz, 2H), 6.68 (d,  $J = 8.4$  Hz, 2H), 6.56 – 6.30 (m, 3H), 2.97 – 2.82 (m, 1H), 2.52 – 2.49 (m, 2H), 1.81 – 1.40 (m, 2H), 1.10 (d,  $J = 6.4$  Hz, 3H).  $^{13}\text{C NMR}$  (101 MHz,  $\text{DMSO-}d_6$ )  $\delta$  155.87 , 132.04 , 129.44 , 115.57 , 46.57 , 39.51 , 31.07 , 21.40 .  
**Brown solid.**

#### 4-(4-hydroxy-3-methoxyphenyl)butan-2-amine hydrochloride

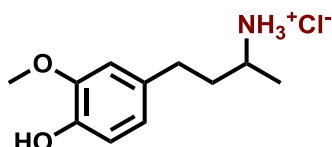

$^1\text{H NMR}$  (300 MHz,  $\text{DMSO-}d_6$ )  $\delta$  8.27 (br s, 3H), 6.84 (d,  $J = 1.9$  Hz, 1H), 6.78 (d,  $J = 8.0$  Hz, 1H), 6.64 (dd,  $J = 8.0, 1.9$  Hz, 1H), 3.79 (s, 3H), 3.26 – 2.95 (m, 1H), 2.65 – 2.57 (m, 2H), 2.07 – 1.87 (m, 1H), 1.87 – 1.60 (m, 1H), 1.28 (d,  $J = 6.5$  Hz, 3H).  $^{13}\text{C NMR}$  (75 MHz,  $\text{DMSO-}d_6$ )  $\delta$  147.91 , 145.12 , 132.11 , 120.71 , 115.84 , 112.93 , 56.04 , 46.87 , 36.50 , 30.86 , 18.47 .  
**Pale yellow solid.**

#### 1-(4-hydroxy-3-methoxyphenyl)propan-2-amine hydrochloride

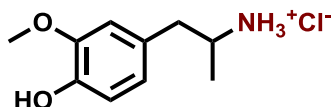

$^1\text{H NMR}$  (400 MHz,  $\text{DMSO-}d_6$ )  $\delta$  8.19 (br s, 3H), 6.80 (d,  $J = 2.0$  Hz, 1H), 6.74 (d,  $J = 8.0$  Hz, 1H), 6.60 (dd,  $J = 8.1, 2.0$  Hz, 1H), 3.75 (s, 3H), 3.40 – 3.25 (m, 1H), 2.92 (dd,  $J = 13.4, 5.3$  Hz, 1H), 2.57 (dd,  $J = 13.5, 8.8$  Hz, 1H), 1.12 (d,  $J = 6.5$  Hz, 3H).  $^{13}\text{C NMR}$  (101 MHz,  $\text{DMSO-}d_6$ )  $\delta$  147.98 , 145.81 , 127.83 , 121.92 , 115.94 , 113.74 , 56.01 , 48.66 , 31.76 , 18.05 .  
**Brown solid.**

#### 1-(4-amino-3,5-dichlorophenyl)ethan-1-amine hydrochloride

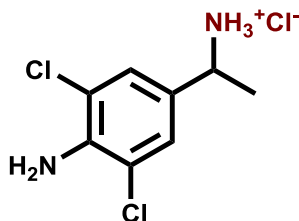

$^1\text{H NMR}$  (400 MHz,  $\text{DMSO-}d_6$ )  $\delta$  8.58 (br s, 3H), 7.46 (s, 2H), 4.45 – 4.09 (m, 1H), 3.83 (br s, 2H), 1.47 (d,  $J = 6.9$  Hz, 3H).  $^{13}\text{C NMR}$  (101 MHz,  $\text{DMSO-}d_6$ )  $\delta$  141.52 , 128.24 , 127.38 , 118.20 , 49.31 , 20.76 .  
**Off white solid.**

### 1-phenylpentan-1-amine hydrochloride

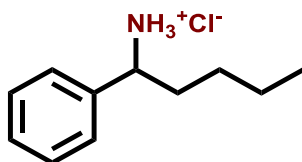

$^1\text{H NMR}$  (400 MHz,  $\text{DMSO-}d_6$ )  $\delta$  8.57 (br s, 3H), 7.57 – 7.47 (m, 2H), 7.46 – 7.31 (m, 3H), 4.15 (dd,  $J = 9.5, 5.3$  Hz, 1H), 2.03 – 1.92 (m, 1H), 1.87 – 1.71 (m, 1H), 1.32 – 1.12 (m, 3H), 1.05 – 0.94 (m, 1H), 0.80 (t,  $J = 7.1$  Hz, 3H).  $^{13}\text{C NMR}$  (101 MHz,  $\text{DMSO-}d_6$ )  $\delta$  138.41 , 129.15 , 128.94 , 127.91 , 54.94 , 34.37 , 27.65 , 22.10 , 14.18 . **Pale brown solid.**

### 1-phenyl-2-(p-tolyl)ethan-1-amine hydrochloride

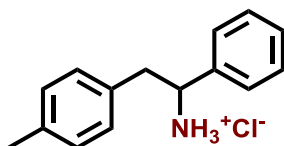

$^1\text{H NMR}$  (300 MHz,  $\text{DMSO-}d_6$ )  $\delta$  8.89 (br s, 3H), 7.49 – 7.40 (m, 2H), 7.37 – 7.27 (m, 3H), 7.03 – 6.88 (m, 4H), 4.59 – 4.26 (m, 1H), 3.42 (dd,  $J = 13.5, 5.1$  Hz, 1H), 3.09 (dd,  $J = 13.4, 10.2$  Hz, 1H), 2.18 (s, 3H).  $^{13}\text{C NMR}$  (75 MHz,  $\text{DMSO-}d_6$ )  $\delta$  137.57 , 135.97 , 133.59 , 129.56 , 129.30 , 128.88 , 128.86 , 128.39 , 56.44 , 40.25 , 21.07 . **White solid.**

### 1,3-diphenylpropan-2-amine hydrochloride

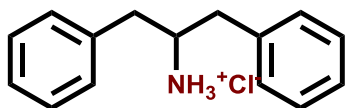

$^1\text{H NMR}$  (400 MHz,  $\text{DMSO-}d_6$ )  $\delta$  8.38 (br s, 3H), 7.44 – 7.08 (m, 10H), 3.73 – 3.51 (m, 1H), 3.04 (dd,  $J = 13.9, 6.3$  Hz, 2H), 2.79 (dd,  $J = 13.9, 6.9$  Hz, 2H).  $^{13}\text{C NMR}$  (101 MHz,  $\text{DMSO-}d_6$ )  $\delta$  136.95, 129.83 , 129.06 , 127.25 , 53.63 , 38.14 . **Brown solid.**

### (1-hydroxycyclohexyl)(phenyl)methanamine hydrochloride

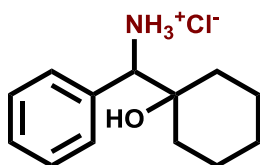

$^1\text{H NMR}$  (400 MHz,  $\text{DMSO-}d_6$ )  $\delta$  8.52 (br s, 3H), 7.52 – 7.45 (m, 2H), 7.41 – 7.34 (m, 3H), 5.04 (s, 1H), 4.11 (s, 1H), 1.87 – 0.88 (m, 10H).  $^{13}\text{C NMR}$  (101 MHz,  $\text{DMSO-}d_6$ )  $\delta$  135.85 , 129.40 , 128.62 , 128.37 , 71.19 , 63.23 , 34.87 , 33.02 , 25.47 , 21.47 , 21.12 . **Off white solid.**

#### 4-(tert-butyl)cyclohexan-1-amine hydrochloride (diastereomeric mixture)

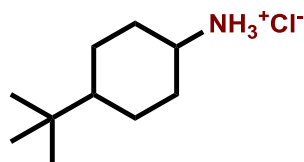

$^1\text{H NMR}$  (400 MHz,  $\text{DMSO-}d_6$ )  $\delta$  7.73 (br s, 3H), 3.42 – 2.66 (m, 1H), 2.17 – 1.20 (m, 7H), 1.05 – 0.87 (m, 2H), 0.79 (s, 9H).  $^{13}\text{C NMR}$  (101 MHz,  $\text{DMSO-}d_6$ )  $\delta$  49.96 , 47.52 , 46.74 , 46.03 , 32.75 , 32.47 , 30.89 , 28.93 , 27.94 , 27.82 , 25.39 , 20.72 . **Off white solid.**

#### 4-(2,6,6-trimethylcyclohex-1-en-1-yl)butan-2-amine hydrochloride

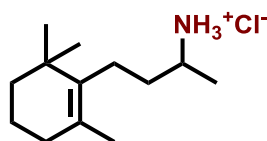

$^1\text{H NMR}$  (300 MHz,  $\text{DMSO-}d_6$ )  $\delta$  8.11 (br s, 3H), 3.24 – 2.97 (m, 1H), 2.06 – 1.92 (m, 2H), 1.87 (t,  $J$  = 6.2 Hz, 2H), 1.75 – 1.60 (m, 1H), 1.56 (s, 3H), 1.54 – 1.44 (m, 3H), 1.42 – 1.33 (m, 2H), 1.22 (d,  $J$  = 6.5 Hz, 3H), 0.97 (s, 3H), 0.97 (s, 3H).  $^{13}\text{C NMR}$  (75 MHz,  $\text{DMSO-}d_6$ )  $\delta$  136.48 , 127.33 , 47.71 , 39.77 , 35.20 , 35.05 , 32.69 , 28.84 , 24.59 , 20.07 , 19.48 , 18.44 . **Brown solid.**

#### Nonan-5-amine hydrochloride

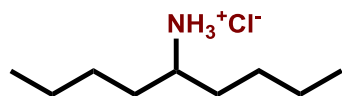

$^1\text{H NMR}$  (300 MHz,  $\text{DMSO-}d_6$ )  $\delta$  8.10 (br s, 3H), 3.08 – 2.87 (m, 1H), 1.60 – 1.42 (m, 4H), 1.36 – 1.20 (m, 8H), 0.93 – 0.73 (m, 6H).  $^{13}\text{C NMR}$  (75 MHz,  $\text{DMSO-}d_6$ )  $\delta$  51.10 , 31.93 , 27.02 , 22.43 , 14.19 . **White solid.**

#### 6-methylhept-5-en-2-amine hydrochloride

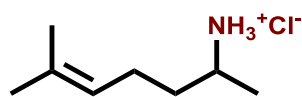

$^1\text{H NMR}$  (300 MHz,  $\text{DMSO-}d_6$ )  $\delta$  6.03 (br s, 3H), 5.19 – 5.06 (m, 1H), 3.27 – 3.00 (m, 1H), 2.22 – 1.94 (m, 2H), 1.82 – 1.59 (m, 7H), 1.58 – 1.42 (m, 1H), 1.26 (d,  $J$  = 6.4 Hz, 3H).  $^{13}\text{C NMR}$  (75 MHz,  $\text{DMSO-}d_6$ )  $\delta$  132.10 , 123.65 , 46.94 , 34.88 , 25.88 , 24.09 , 18.60 , 18.04 . **Pale brown gum.**

#### 4-(1H-indol-3-yl)butan-2-amine hydrochloride

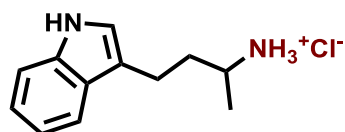

$^1\text{H NMR}$  (300 MHz,  $\text{DMSO-}d_6$ )  $\delta$  11.00 (s, 1H), 8.31 (br s, 3H), 7.57 (d,  $J$  = 7.8 Hz, 1H), 7.39 (d,  $J$  = 8.0 Hz, 1H), 7.22 – 7.15 (m, 1H), 7.08 (ddd,  $J$  = 8.1, 7.0, 1.2 Hz, 1H), 6.99 (ddd,  $J$  = 7.9, 6.9, 1.1 Hz, 1H), 3.29 – 3.09 (m, 1H), 2.94 – 2.65 (m, 2H), 2.21 – 1.99 (m, 1H), 1.95 – 1.68 (m, 1H), 1.30

(d,  $J = 6.4$  Hz, 3H).  $^{13}\text{C}$  NMR (75 MHz,  $\text{DMSO-}d_6$ )  $\delta$  136.82 , 127.41 , 122.81 , 121.40 , 118.85 , 118.64 , 113.60 , 111.96 , 47.14 , 35.18 , 21.27 , 18.54 . **Brown solid.**

#### 4-(6-methoxynaphthalen-2-yl)butan-2-amine hydrochloride

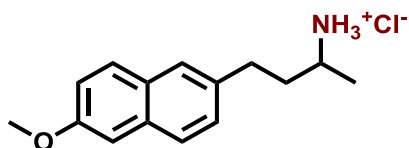

$^1\text{H}$  NMR (300 MHz,  $\text{DMSO-}d_6$ )  $\delta$  8.36 (br s, 3H), 7.77 (dd,  $J = 8.8, 2.7$  Hz, 2H), 7.70 – 7.60 (m, 1H), 7.37 (dd,  $J = 8.4, 1.7$  Hz, 1H), 7.30 (d,  $J = 2.5$  Hz, 1H), 7.16 (dd,  $J = 8.9, 2.5$  Hz, 1H), 3.87 (s, 3H), 3.35 – 3.12 (m, 1H), 2.96 – 2.70 (m, 2H), 2.19 – 2.01 (m, 1H), 1.95 – 1.71 (m, 1H), 1.32 (d,  $J = 6.5$  Hz, 3H).  $^{13}\text{C}$  NMR (75 MHz,  $\text{DMSO-}d_6$ )  $\delta$  157.27 , 136.55 , 133.26 , 129.25 , 129.03 , 128.02 , 127.31 , 126.41 , 119.00 , 106.25 , 55.60 , 46.98 , 36.21 , 31.28 , 18.51 . **Off white solid.**

#### 6-(3,7-dimethyl-2,6-dioxo-2,3,6,7-tetrahydro-1H-purin-1-yl)hexan-2-amine hydrochloride

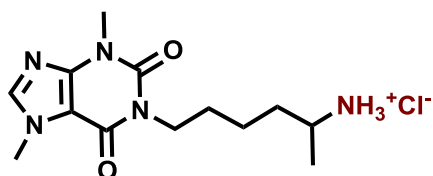

$^1\text{H}$  NMR (300 MHz,  $\text{Methanol-}d_4$ )  $\delta$  7.91 (s, 1H), 4.83 (br s, 3H), 3.89 (s, 3H), 3.87 – 3.81 (m, 2H), 3.40 (s, 3H), 3.25 – 3.16 (m, 1H), 1.70 – 1.48 (m, 4H), 1.43 – 1.29 (m, 2H), 1.24 (d,  $J = 6.4$  Hz, 3H).  $^{13}\text{C}$  NMR (75 MHz,  $\text{Methanol-}d_4$ )  $\delta$  154.88 , 151.34 , 147.72 , 142.33 , 107.26 , 47.55 , 40.46 , 33.88 , 32.93 , 28.96 , 27.13 , 22.29 , 17.33 . **White solid.**

#### 1-(4-fluorophenyl)-4-(4-(pyridin-2-yl)piperazin-1-yl)butan-1-amine

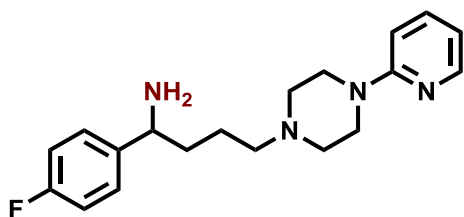

$^1\text{H}$  NMR (300 MHz,  $\text{Chloroform-}d$ )  $\delta$  8.17 – 8.01 (m, 1H), 7.45 – 7.30 (m, 1H), 7.27 – 7.21 (m, 2H), 6.99 – 6.86 (m, 2H), 6.66 – 6.31 (m, 2H), 3.99 – 3.67 (m, 1H), 3.57 – 3.33 (m, 4H), 3.32 – 3.15 (m, 2H), 2.51 – 2.33 (m, 4H), 2.29 (t,  $J = 7.3$  Hz, 2H), 1.84 – 1.06 (m, 4H).  $^{13}\text{C}$  NMR (75 MHz,  $\text{Chloroform-}d$ )  $\delta$  161.92 (d,  $J = 245.1$  Hz), 159.47 , 147.90 , 140.73 , 137.43 , 128.05 (d,  $J = 7.9$  Hz), 115.32 (d,  $J = 21.2$  Hz), 113.30 , 107.07 , 58.35 , 55.45 , 52.97 , 45.10 , 36.98 , 23.70 .  $^{19}\text{F}$  NMR (282 MHz,  $\text{Chloroform-}d$ )  $\delta$  -114.96 . **Brown solid.**

**(8R,9S,13S,14S)-3-hydroxy-13-methyl-7,8,9,11,12,13,14,15,16,17-decahydro-6H-cyclopenta[a]phenanthren-17-amine hydrochloride (diastereomeric mixture)**

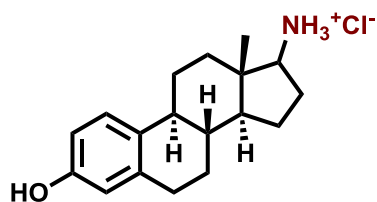

**<sup>1</sup>H NMR (400 MHz, DMSO-*d*<sub>6</sub>)** δ 9.11 (br s, 1H), 8.27 (br s, 3H), 7.03 (d, *J* = 8.7 Hz, 1H), 6.53 (dd, *J* = 8.4, 2.6 Hz, 1H), 6.46 (d, *J* = 2.7 Hz, 1H), 3.22 – 2.91 (m, 1H), 2.86 – 2.61 (m, 2H), 2.30 – 2.00 (m, 4H), 1.85 – 1.51 (m, 4H), 1.35 – 1.20 (m, 5H), 0.75 (s, 3H). **<sup>13</sup>C NMR (101 MHz, DMSO-*d*<sub>6</sub>)** δ 155.52, 155.40, 137.43, 137.41, 130.80, 130.38, 126.54, 126.44, 115.42, 115.40, 113.26, 113.21, 59.95, 59.24, 51.27, 49.98, 47.93, 43.99, 43.86, 43.56, 43.27, 39.16, 38.66, 36.23, 29.64, 29.53, 28.38, 28.26, 27.50, 27.44, 26.71, 26.18, 26.09, 23.55, 18.35, 12.16. (traces of ethylacetate solvent peak was observed in the NMR spectra). **HRMS (ESI-TOF, *m/z*):** Calcd for C<sub>18</sub>H<sub>25</sub>NO [*M*+*H*]<sup>+</sup> 272.2014; found 272.2013. **Off white solid.**

**(5S,8R,9R,10S,13S,14S,17S)-17-hydroxy-10,13-dimethylhexadecahydro-1H-cyclopenta[a]phenanthren-3-amine hydrochloride (diastereomeric mixture)**

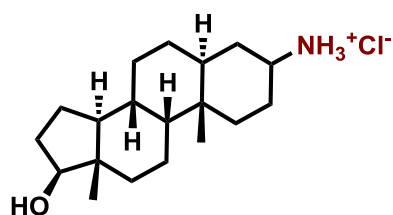

**<sup>1</sup>H NMR (400 MHz, DMSO-*d*<sub>6</sub>)** δ 8.09 (br s, 3H), 4.44 (s, 1H), 3.49 – 3.14 (m, 1H), 1.97 – 0.81 (m, 23H), 0.75 (s, 3H), 0.62 (s, 3H). **<sup>13</sup>C NMR (101 MHz, DMSO-*d*<sub>6</sub>)** δ 80.53, 80.48, 54.08, 53.70, 52.94, 52.70, 51.20, 51.01, 49.90, 46.68, 44.57, 44.02, 42.18, 43.02, 38.44, 37.11, 37.05, 36.49, 36.00, 35.56, 35.48, 32.77, 31.61, 31.26, 30.99, 30.30, 28.44, 28.21, 26.32, 26.27, 24.29, 23.51, 20.79, 20.73, 20.40, 12.29, 11.81, 11.56. **HRMS (ESI-TOF, *m/z*):** Calcd for C<sub>19</sub>H<sub>33</sub>NO [*M*+*H*]<sup>+</sup> 292.2640; found 292.2646. **White solid.**

**(5S,8R,9S,10S,13S,14S,17S)-17-hydroxy-10,13,17-trimethylhexadecahydro-1H-cyclopenta[a]phenanthren-3-amine hydrochloride**

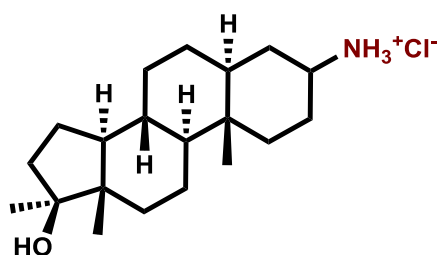

$^1\text{H NMR}$  (400 MHz,  $\text{DMSO-}d_6$ )  $\delta$  8.11 (br s, 3H), 3.46 – 3.21 (m, 1H), 1.82 – 1.10 (m, 22H), 1.08 (s, 3H), 0.76 (s, 3H), 0.74 (s, 3H).  $^{13}\text{C NMR}$  (101 MHz,  $\text{DMSO-}d_6$ )  $\delta$  80.14 , 80.12 , 53.95 , 53.60 , 51.01 , 50.88 , 50.66 , 49.92 , 49.04 , 46.68 , 45.63 , 45.44 , 44.62 , 40.64 , 38.78 , 38.44 , 36.51 , 36.34 , 36.28 , 36.00 , 35.90 , 35.81 , 35.57 , 32.78 , 31.92 , 31.85 , 31.78 , 31.28 , 30.99 , 28.50 , 28.26 , 26.61 , 26.30 , 24.30 , 23.49 , 20.85 , 20.45 , 14.67 , 12.29 , 11.57 . (OH proton was not picked up in  $^1\text{H NMR}$ ). **HRMS (ESI-TOF, m/z):** Calcd for  $\text{C}_{20}\text{H}_{35}\text{NO}$   $[\text{M}+\text{H}]^+$  360.2797; found 306.2792.

**White solid.**

**(1S,5S,8R,9S,10S,13S,14S,17S)-17-hydroxy-1,10,13-trimethylhexadecahydro-1H-cyclopenta[a]phenanthren-3-amine hydrochloride**

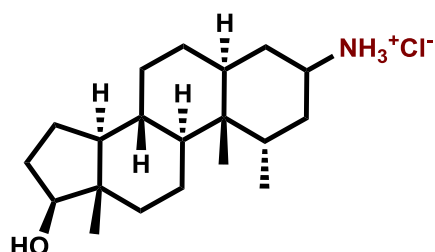

$^1\text{H NMR}$  (300 MHz,  $\text{DMSO-}d_6$ )  $\delta$  7.50 (br s, 3H), 3.87 - 3.12 (m, 1H), 3.12 - 2.822 (m, 1H), 09 – 1.02 (m, 18H), 1.02 – 0.73 (m, 9H), 0.60 (s, 3H).  $^{13}\text{C NMR}$  (75 MHz,  $\text{DMSO-}d_6$ )  $\delta$  80.45 , 80.42 , 51.24 , 51.12 , 48.60 , 46.16 , 46.03 , 43.07 , 37.76 , 37.72 , 37.50 , 37.46 , 37.22 , 36.94 , 36.11 , 35.97 , 35.59 , 34.37 , 33.07 , 32.98 , 31.79 , 31.72 , 31.41 , 31.29 , 31.06 , 30.25 , 28.50 , 28.41 , 26.79 , 23.50 , 20.06 , 19.91 , 15.58 , 14.90 , 14.84 , 14.10 , 14.05 , 13.84 , 12.25 , 11.89 . (OH proton was not picked up in  $^1\text{H NMR}$ ) **HRMS (ESI-TOF, m/z):** Calcd for  $\text{C}_{20}\text{H}_{35}\text{NO}$   $[\text{M}+\text{H}]^+$  360.2797; found 306.2800. **White solid.**

## NMR spectra

190107.402.10.fid  
Kathir KM22-115  
Au1H DMSO {C:\Bruker\TopSpin3.5pl6} 1901 2

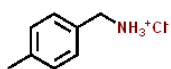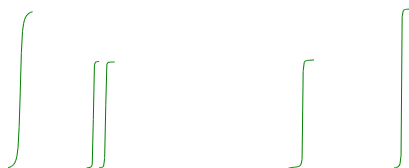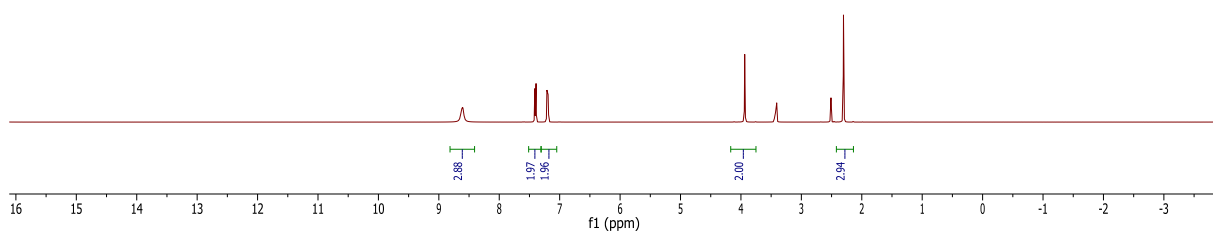

Supplementary Figure 13. <sup>1</sup>H NMR (400 MHz, DMSO-d<sub>6</sub>)

190107.402.11.fid  
Kathir KM22-115  
Au13C DMSO {C:\Bruker\TopSpin3.5pl6} 1901 2

138.11  
131.54  
125.47  
125.43

42.30

21.22

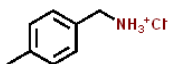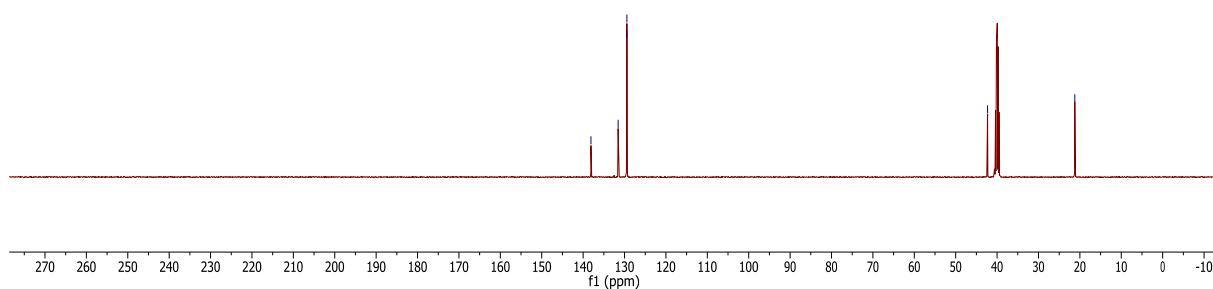

Supplementary Figure 14. <sup>13</sup>C NMR (101 MHz, DMSO-d<sub>6</sub>)



190121.322.10.fid  
Kathir KM22-170  
Au1H DMSO {C:\Bruker\TopSpin3.6.0} 1901 22

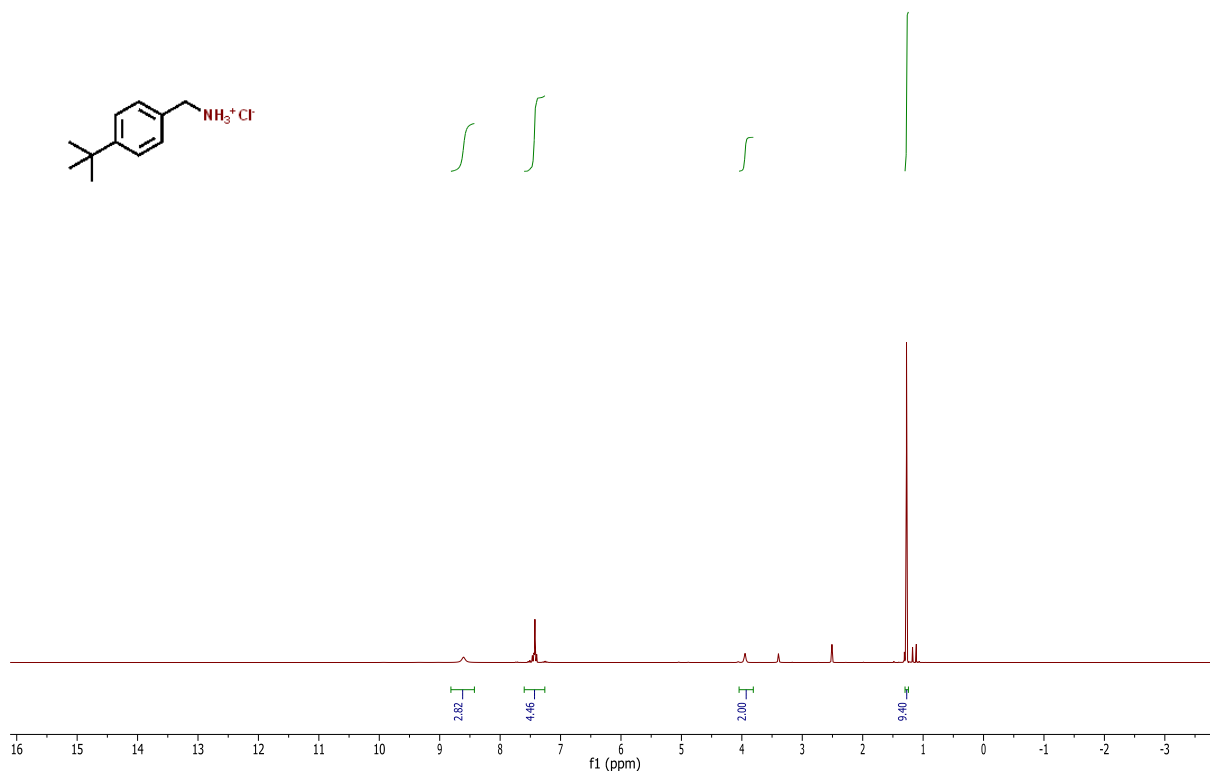

Supplementary Figure 15.  $^1\text{H NMR}$  (300 MHz,  $\text{DMSO-}d_6$ )

190121.322.11.fid  
Kathir KM22-170  
Au13C DMSO {C:\Bruker\TopSpin3.6.0} 1901 22

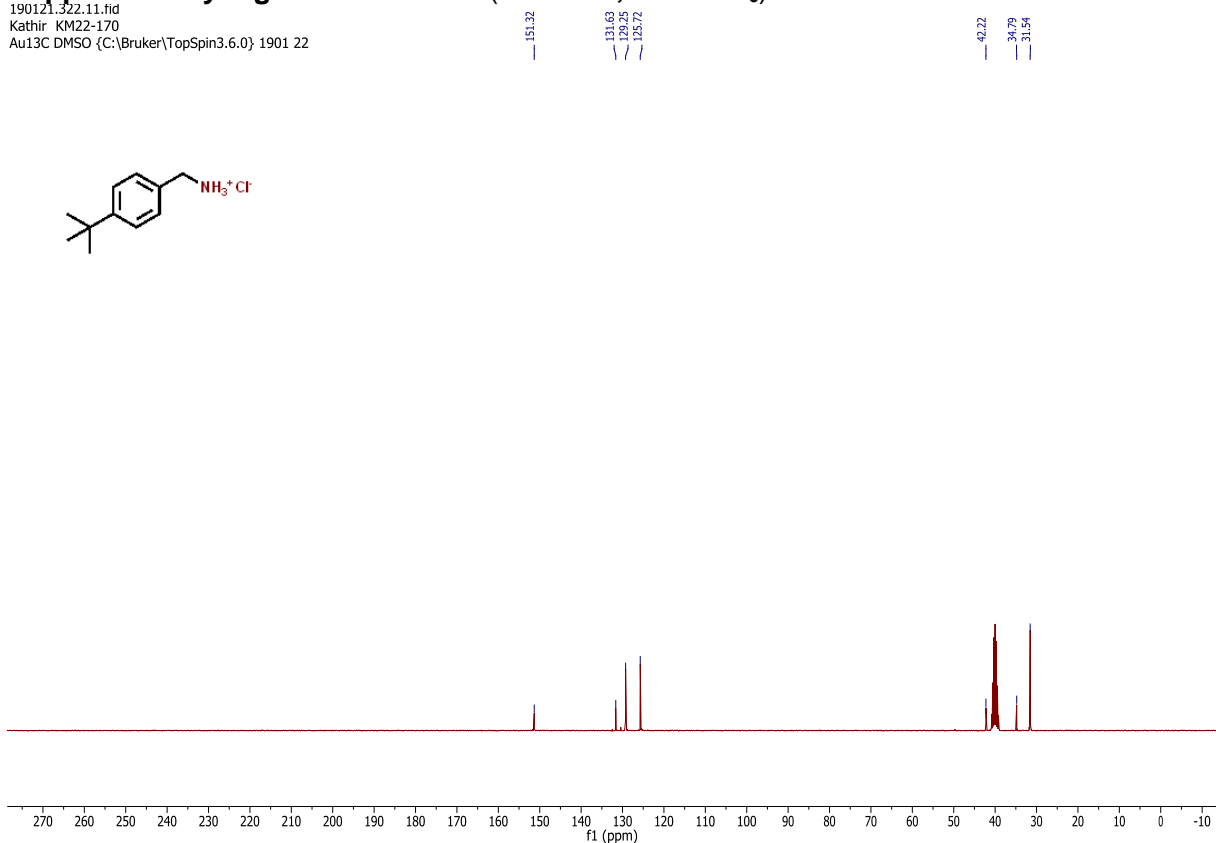

Supplementary Figure 16.  $^{13}\text{C NMR}$  (75 MHz,  $\text{DMSO-}d_6$ )

190107.401.10.fid  
Kathir KM22-113  
Au1H DMSO {C:\Bruker\TopSpin3.5pl6} 1901 1

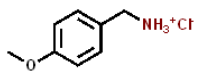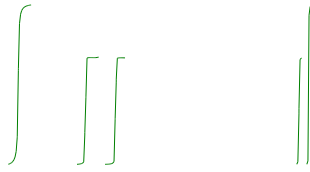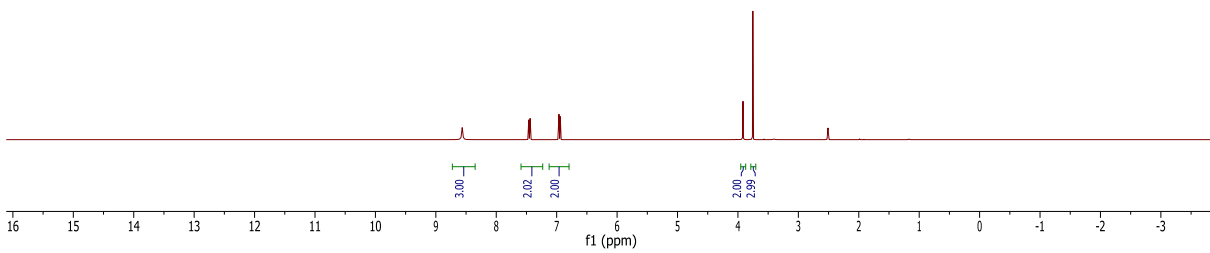

**Supplementary Figure 17. <sup>1</sup>H NMR (400 MHz, DMSO-d<sub>6</sub>)**

190107.401.11.fid  
Kathir KM22-113  
Au13C DMSO {C:\Bruker\TopSpin3.5pl6} 1901 1

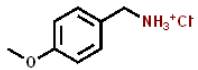

159.74  
131.03  
126.67  
114.31  
55.65  
42.04

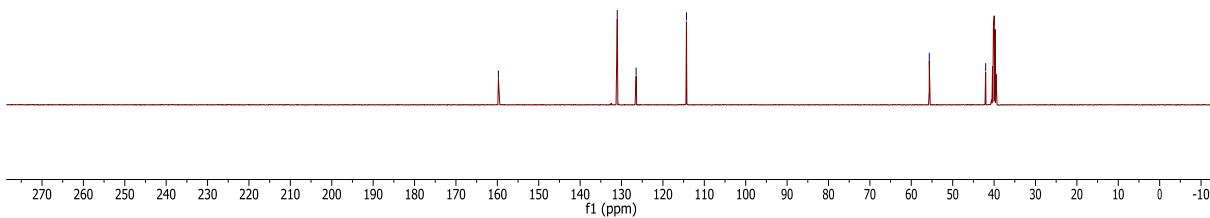

**Supplementary Figure 18. <sup>13</sup>C NMR (101 MHz, DMSO-d<sub>6</sub>)**

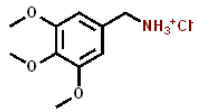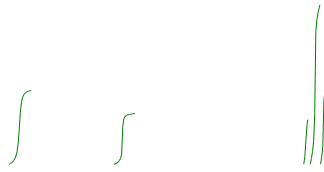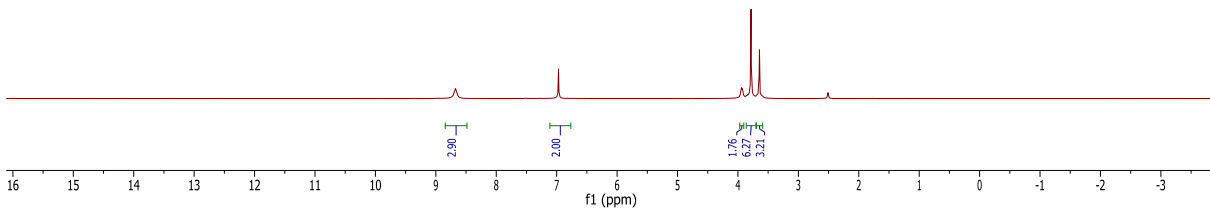

Supplementary Figure 19. <sup>1</sup>H NMR (400 MHz, DMSO-d<sub>6</sub>)

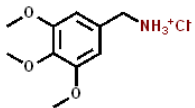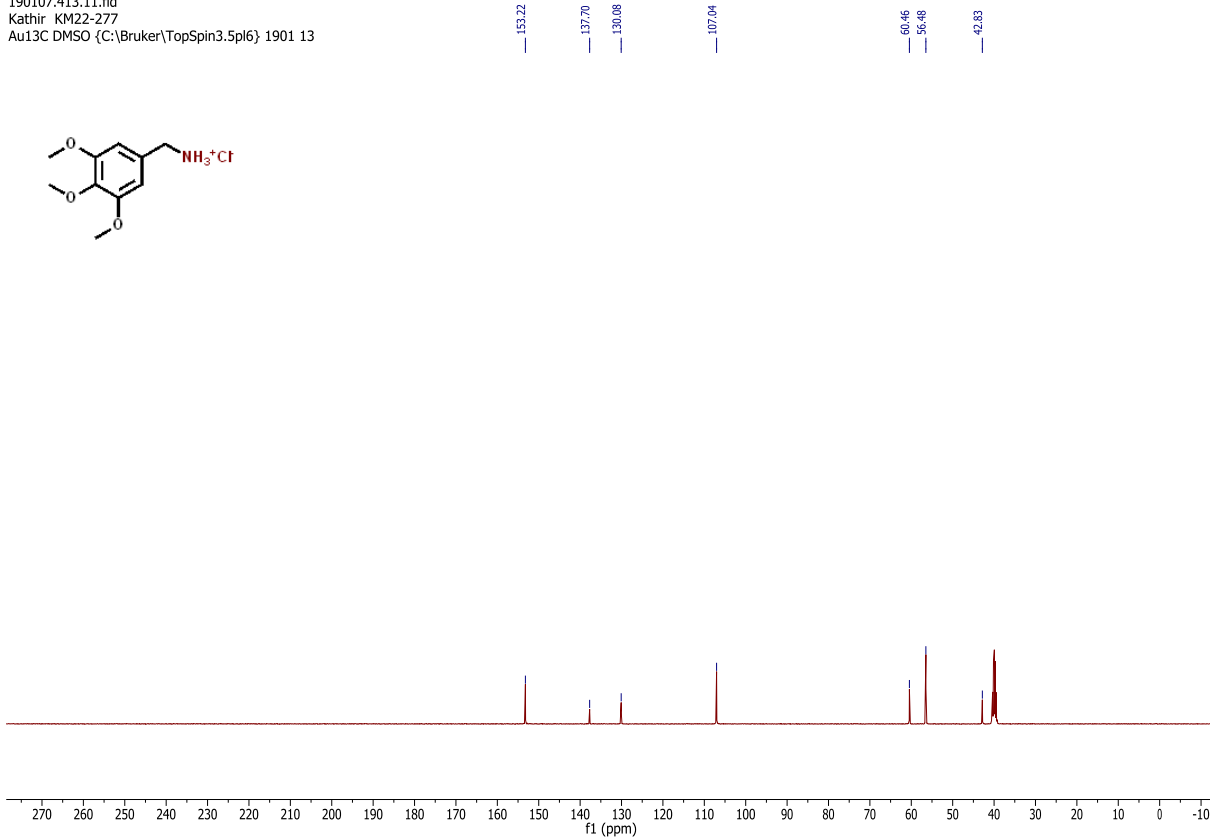

Supplementary Figure 20. <sup>13</sup>C NMR (101 MHz, DMSO-d<sub>6</sub>)

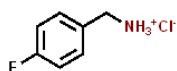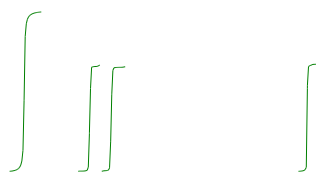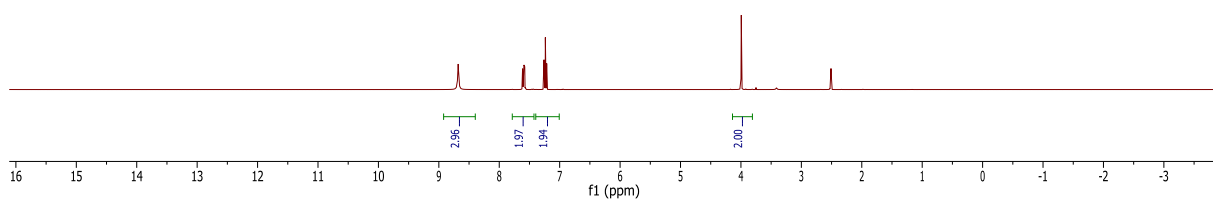

Supplementary Figure 21. <sup>1</sup>H NMR (400 MHz, DMSO-*d*<sub>6</sub>)

190107.408.11.fid  
Kathir KM22-191  
Au13C DMSO {C:\Bruker\TopSpin3.5pl6} 1901 8

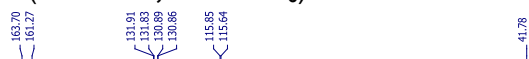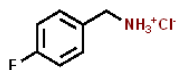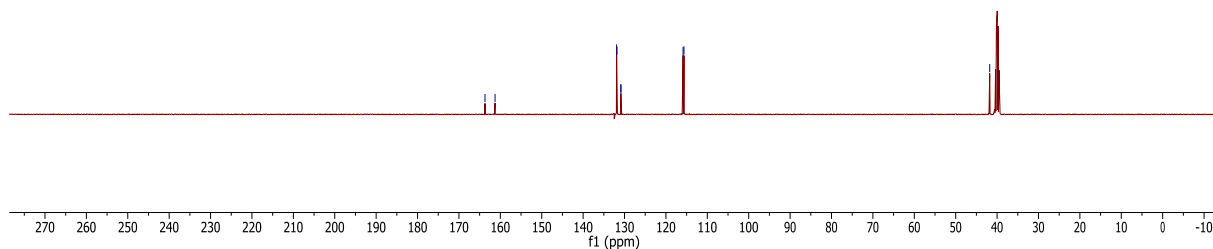

Supplementary Figure 22. <sup>13</sup>C NMR (101 MHz, DMSO-*d*<sub>6</sub>)

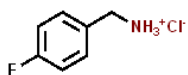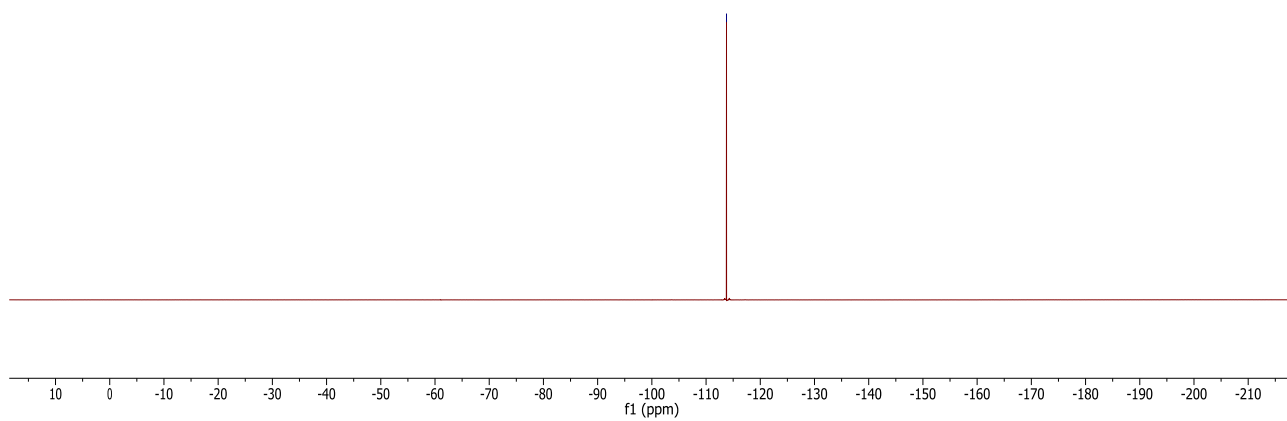

Supplementary Figure 23.  $^{19}\text{F}$  NMR (282 MHz,  $\text{DMSO}-d_6$ )

190107.419.10.fid  
Kathir KM22-338  
Au1H DMSO {C:\Bruker\TopSpin3.5pl6} 1901 19

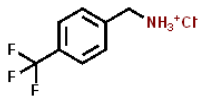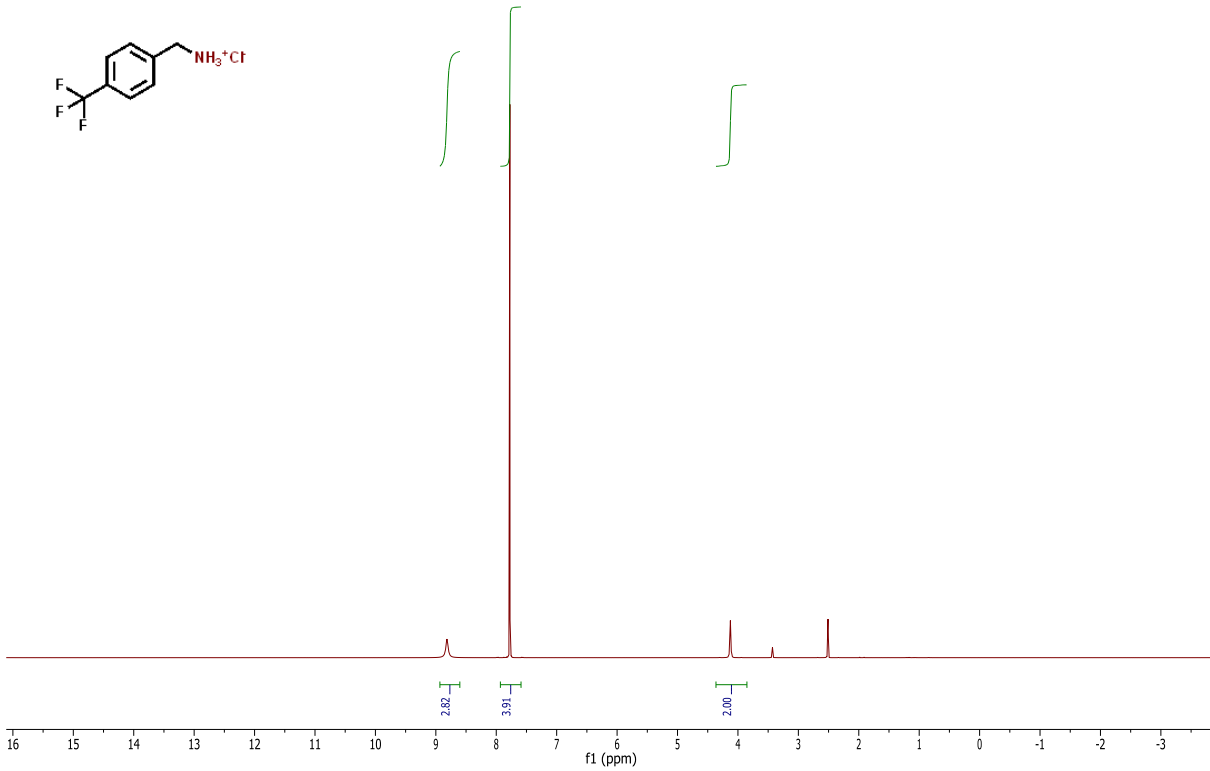

**Supplementary Figure 24. <sup>1</sup>H NMR (400 MHz, DMSO-d<sub>6</sub>)**

190107.419.11.fid  
Kathir KM22-338  
Au13C DMSO {C:\Bruker\TopSpin3.5pl6} 1901 19

139.30  
130.27  
129.74  
129.42  
129.39  
128.79  
128.64  
125.94  
125.80  
125.76  
125.72  
125.69  
125.53  
120.53

41.99

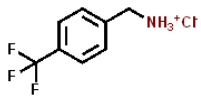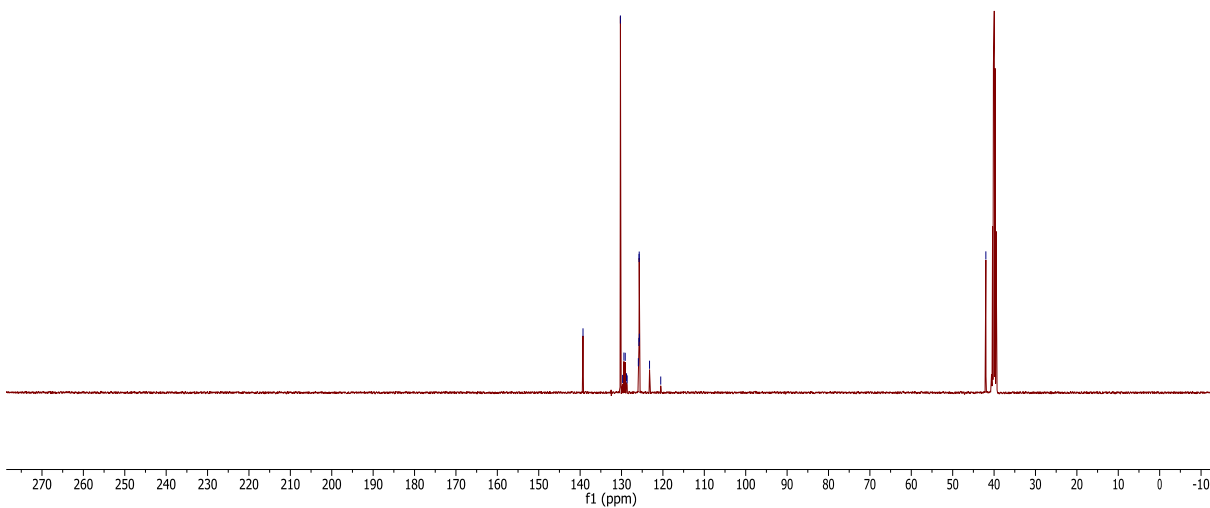

**Supplementary Figure 25.**  $^{13}\text{C}$  NMR (101 MHz,  $\text{DMSO-}d_6$ )

190531.f316.11.fid  
Kathir KM22-338  
19F(H-entk) DMSO {C:\Bruker\TopSpin3.6.0} 1905 16

-61.4

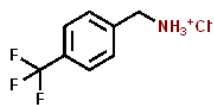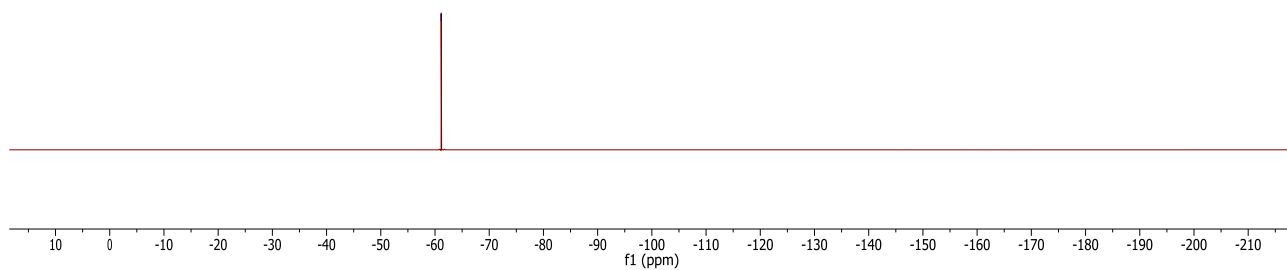

**Supplementary Figure 26.**  $^{19}\text{F}$  NMR (282 MHz,  $\text{DMSO-}d_6$ )

190107.403.10.fid  
Kathir KM22-159  
Au1H DMSO {C:\Bruker\TopSpin3.5pl6} 1901 3

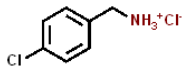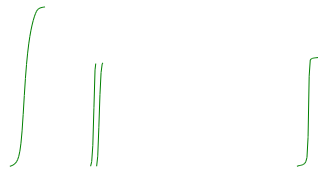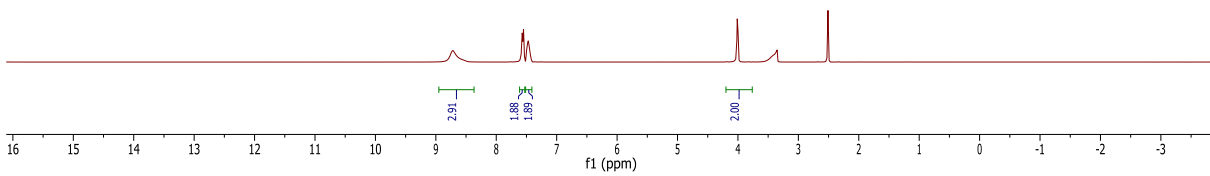

Supplementary Figure 27. <sup>1</sup>H NMR (400 MHz, DMSO-d<sub>6</sub>)

190107.403.11.fid  
Kathir KM22-159  
Au13C DMSO {C:\Bruker\TopSpin3.5pl6} 1901 3

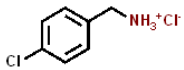

133.59  
133.52  
133.00  
133.90

41.81

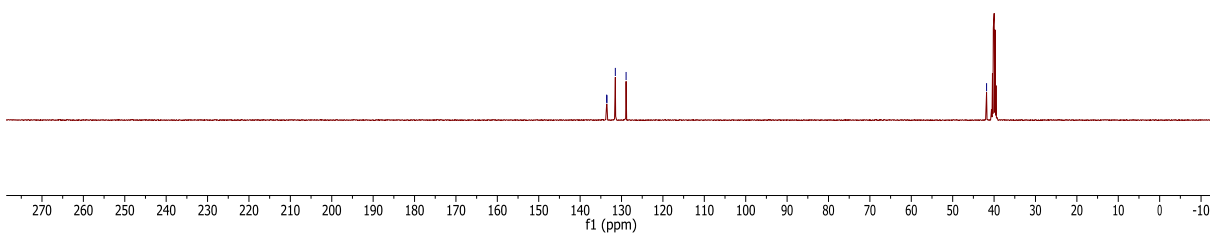

Supplementary Figure 28. <sup>13</sup>C NMR (101 MHz, DMSO-d<sub>6</sub>)



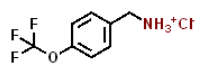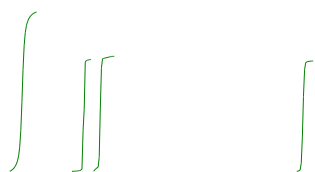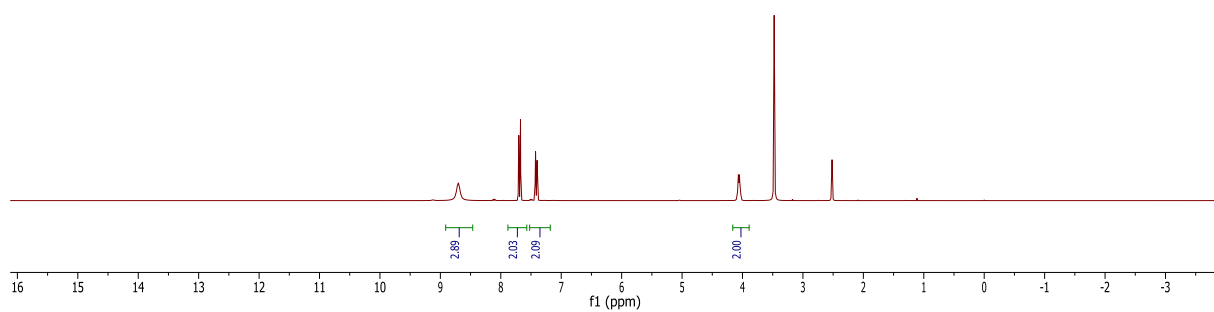

**Supplementary Figure 29.** <sup>1</sup>H NMR (300 MHz, DMSO-d<sub>6</sub>)

190121.324.11.fid  
Kathir KM22-434  
Au13C DMSO {C:\Bruker\TopSpin3.6.0} 1901 24

146.70  
134.07  
131.67  
125.58  
122.18  
121.52  
118.78  
115.59

41.76

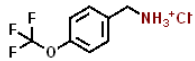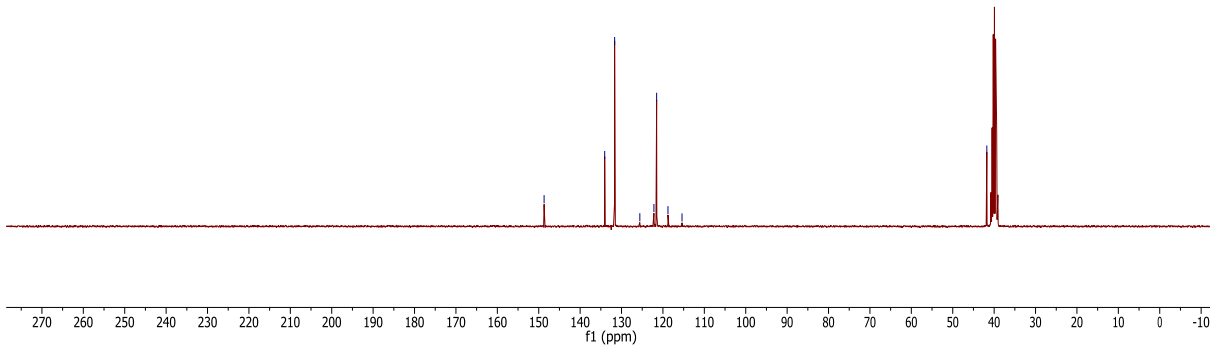

Supplementary Figure 30. <sup>13</sup>C NMR (75 MHz, DMSO-*d*<sub>6</sub>)

190531.f317.11.fid  
Kathir KM22-434  
19F(H-entk) DMSO {C:\Bruker\TopSpin3.6.0} 1905 17

-56.91

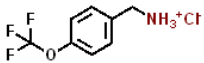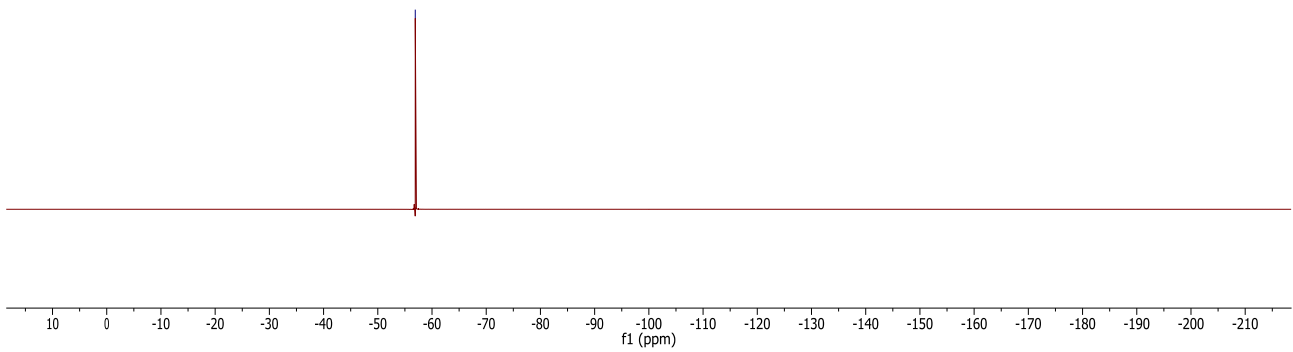

Supplementary Figure 31. <sup>19</sup>F NMR (282 MHz, DMSO-*d*<sub>6</sub>)

190107.418.10.fid  
Kathir KM22-290  
Au1H DMSO {C:\Bruker\TopSpin3.5pl6} 1901 18

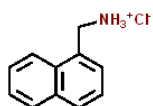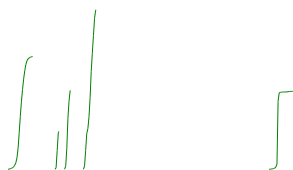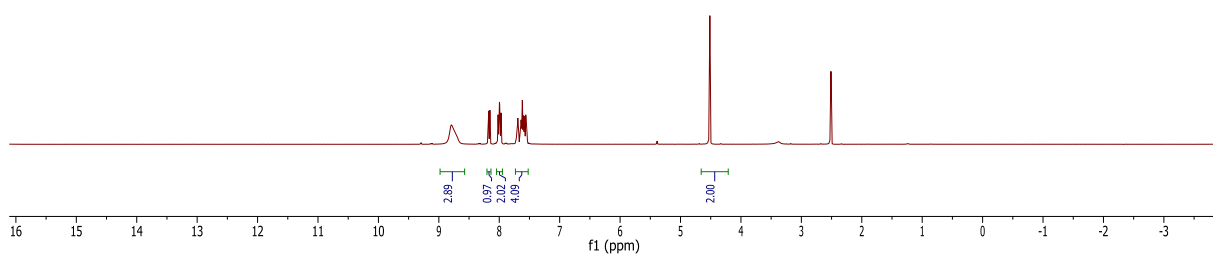

Supplementary Figure 32. <sup>1</sup>H NMR (400 MHz, DMSO-d<sub>6</sub>)

190107.418.11.fid  
Kathir KM22-290  
Au13C DMSO {C:\Bruker\TopSpin3.5pl6} 1901 18

133.65  
131.12  
130.46  
129.08  
127.72  
127.19  
126.66  
125.81  
123.95

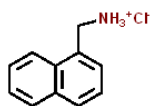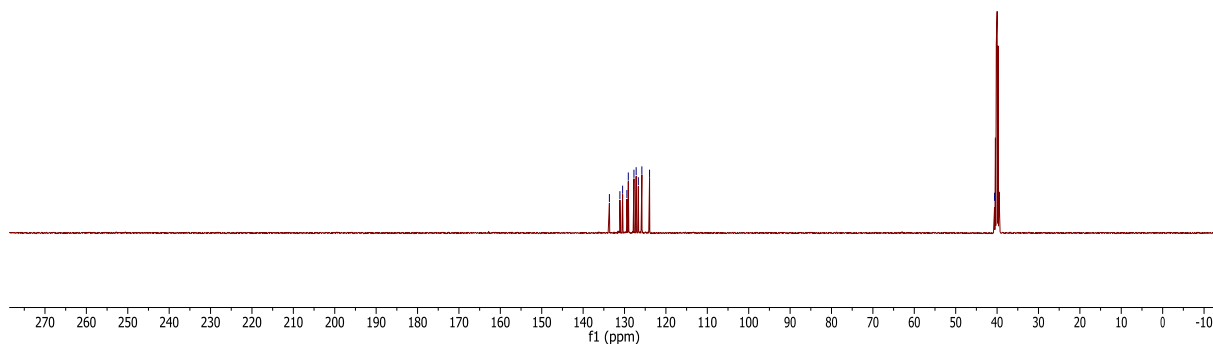

Supplementary Figure 33. <sup>13</sup>C NMR (101 MHz, DMSO-d<sub>6</sub>)

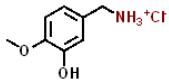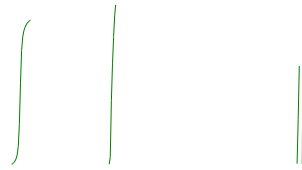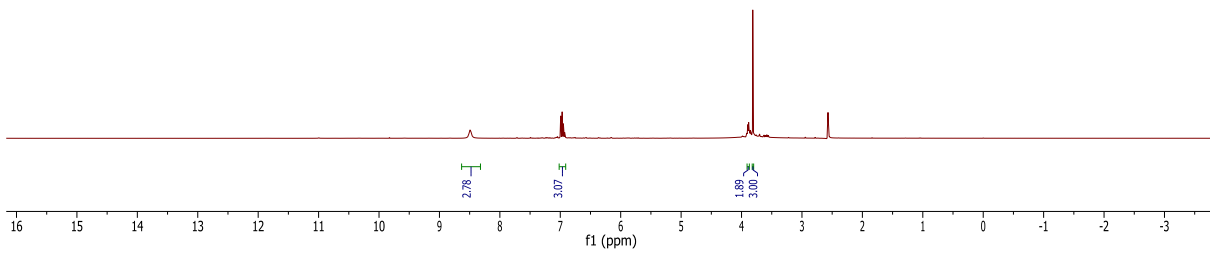

Supplementary Figure 34. <sup>1</sup>H NMR (400 MHz, DMSO-d<sub>6</sub>)

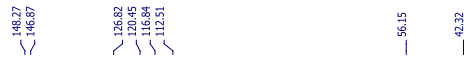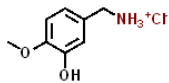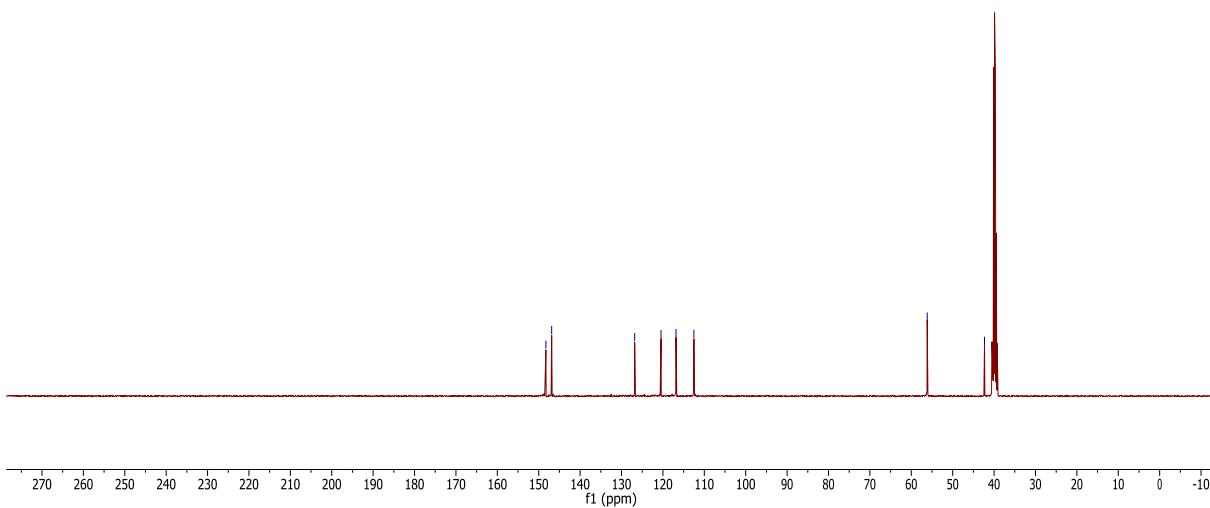

Supplementary Figure 35. <sup>13</sup>C NMR (101 MHz, DMSO-d<sub>6</sub>)

190107.411.10.fid  
Kathir KM22-296  
Au1H DMSO {C:\Bruker\TopSpin3.5pl6} 1901 11

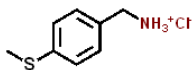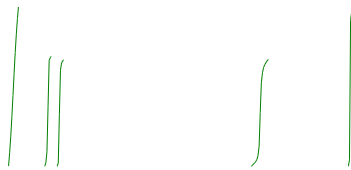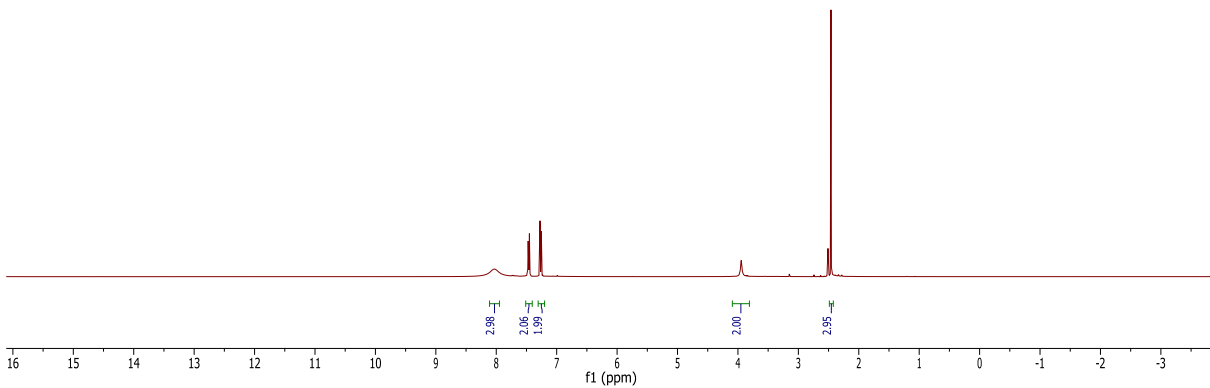

Supplementary Figure 36. <sup>1</sup>H NMR (400 MHz, DMSO-d<sub>6</sub>)

190107.411.11.fid  
Kathir KM22-296  
Au13C DMSO {C:\Bruker\TopSpin3.5pl6} 1901 11

138.95  
130.92  
130.17  
126.21  
42.11  
15.13

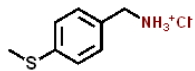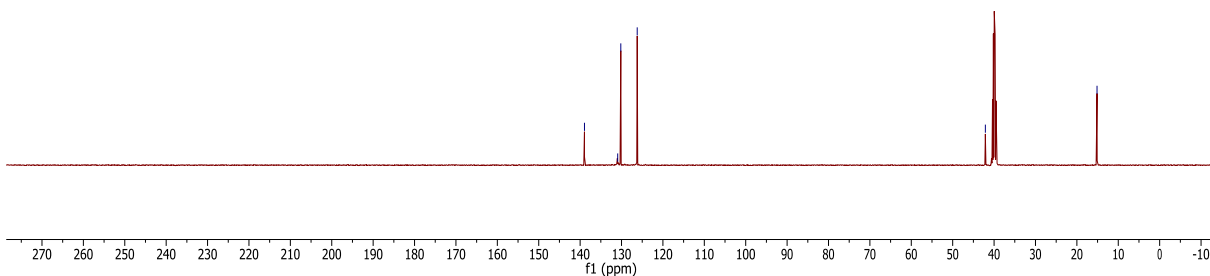

Supplementary Figure 37. <sup>13</sup>C NMR (101 MHz, DMSO-d<sub>6</sub>)

190107.406.10.fid  
Kathir KM22-190  
Au1H DMSO {C:\Bruker\TopSpin3.5pl6} 1901 6

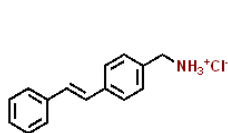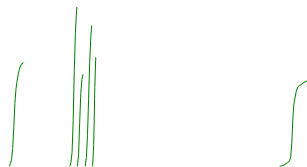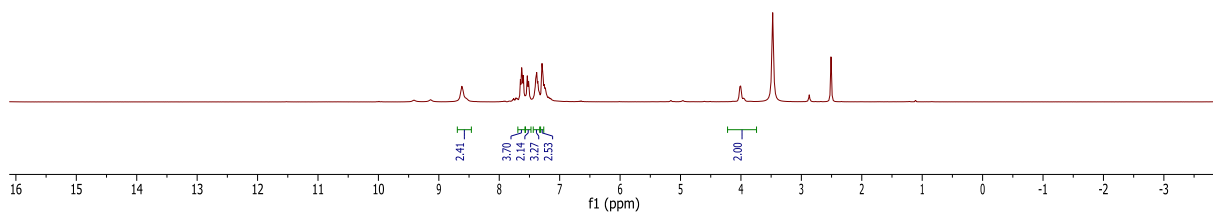

**Supplementary Figure 38.** <sup>1</sup>H NMR (400 MHz, DMSO-d<sub>6</sub>)

190107.406.11.fid  
Kathir KM22-190  
Au13C DMSO {C:\Bruker\TopSpin3.5pl6} 1901 6

137.59  
137.31  
133.76  
128.86  
128.40  
129.20  
128.26  
128.22  
127.00

42.37

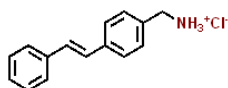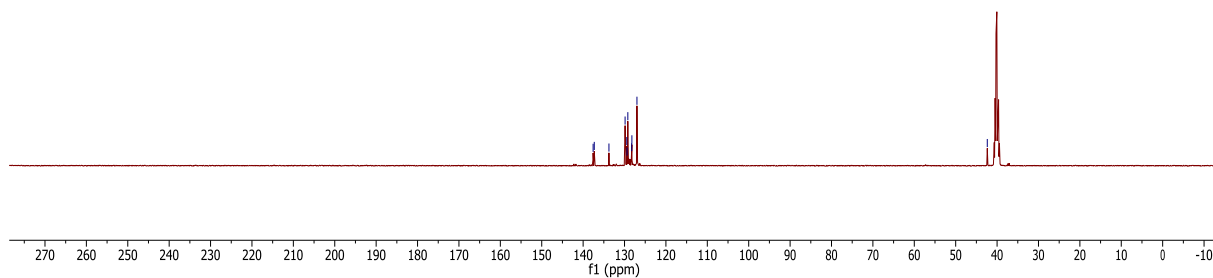

**Supplementary Figure 39.** <sup>13</sup>C NMR (101 MHz, DMSO-d<sub>6</sub>)

190121.323.10.fid  
Kathir KM22-314  
Au1H DMSO {C:\Bruker\TopSpin3.6.0} 1901 23

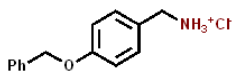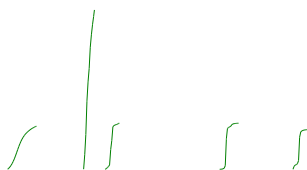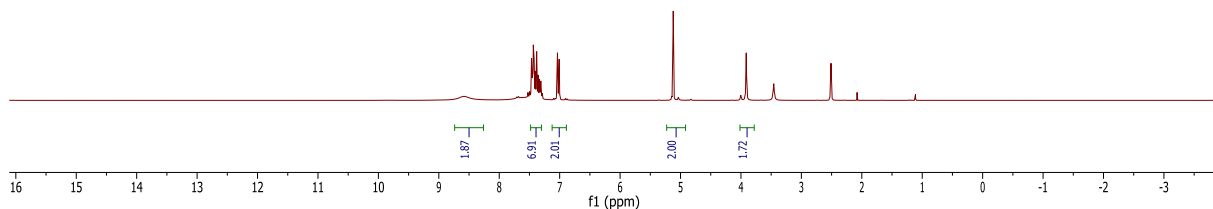

Supplementary Figure 40. <sup>1</sup>H NMR (300 MHz, DMSO-d<sub>6</sub>)

190121.323.11.fid  
Kathir KM22-314  
Au13C DMSO {C:\Bruker\TopSpin3.6.0} 1901 23

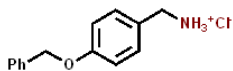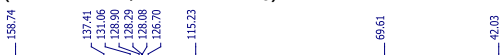

Supplementary Figure 41. <sup>13</sup>C NMR (75 MHz, DMSO-d<sub>6</sub>)

190124.420.10.fid  
Kathir KM22-387  
Au1H DMSO {C:\Bruker\TopSpin3.5pl6} 1901 20

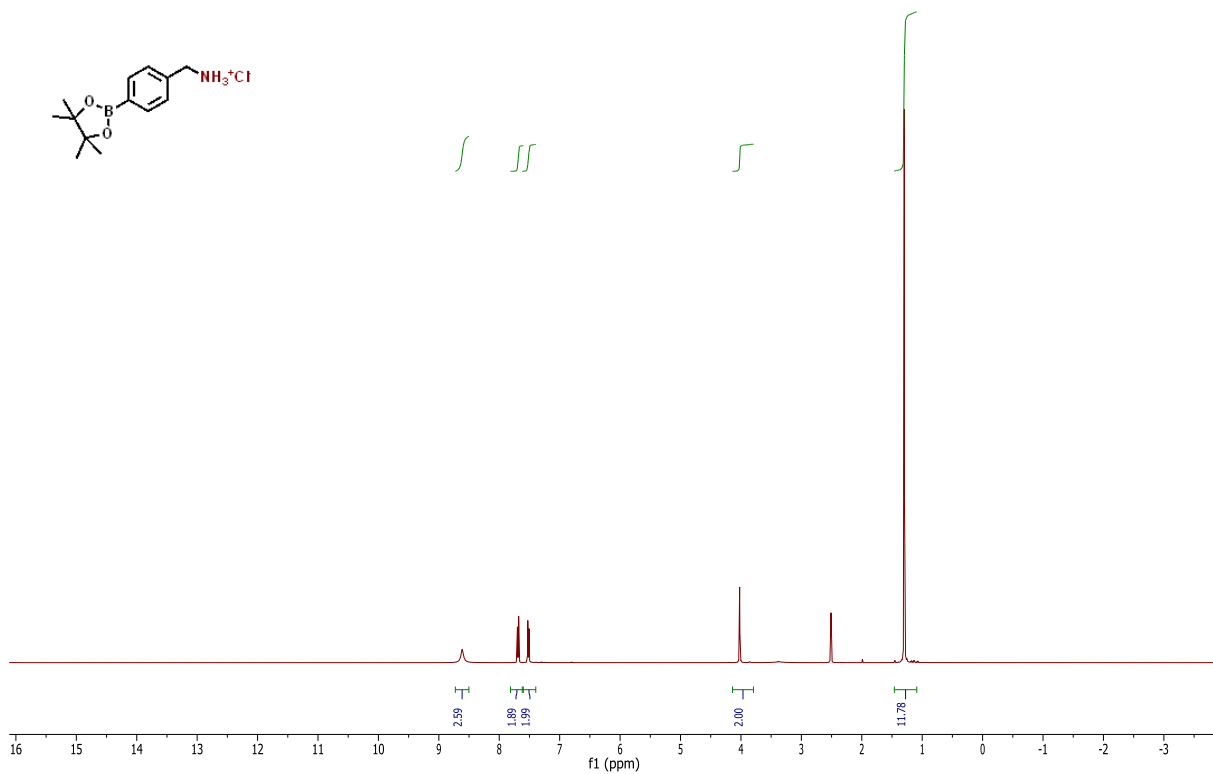

Supplementary Figure 42. <sup>1</sup>H NMR (400 MHz, DMSO-d<sub>6</sub>)

190124.420.11.fid  
Kathir KM22-387  
Au13C DMSO {C:\Bruker\TopSpin3.5pl6} 1901 20

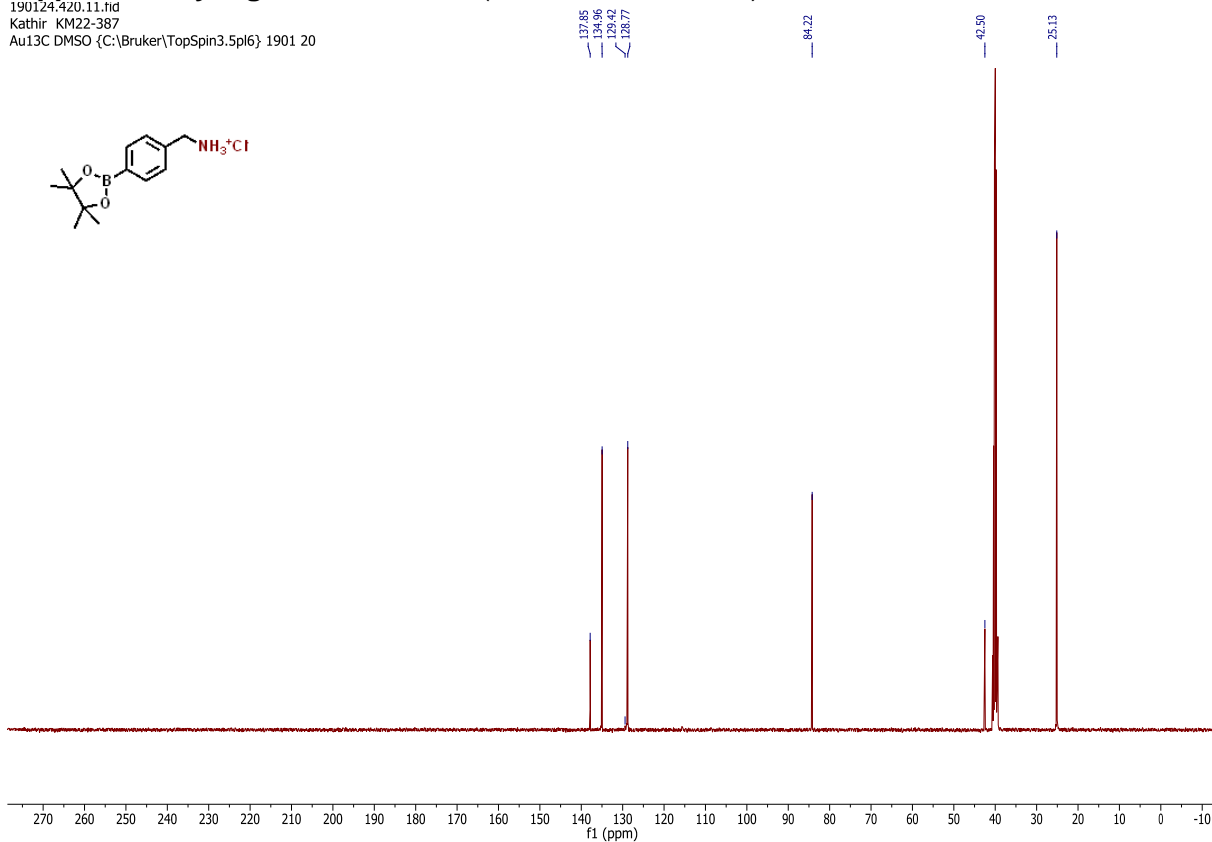

Supplementary Figure 43. <sup>13</sup>C NMR (101 MHz, DMSO-d<sub>6</sub>)



190107.415.10.fid  
Kathir KM22-280  
Au1H DMSO {C:\Bruker\TopSpin3.5pl6} 1901 15

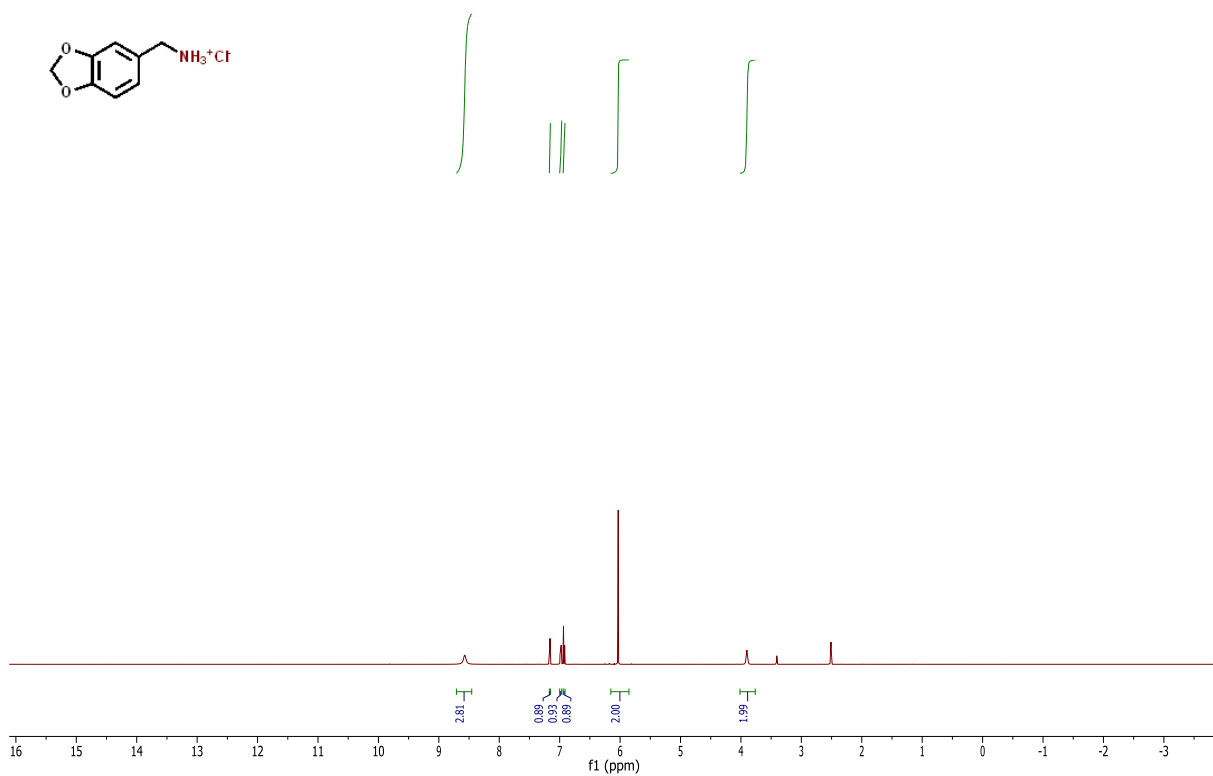

**Supplementary Figure 44. <sup>1</sup>H NMR (400 MHz, DMSO-d<sub>6</sub>)**

190107.415.11.fid  
Kathir KM22-280  
Au13C DMSO {C:\Bruker\TopSpin3.5pl6} 1901 15

147.69  
147.67  
128.17  
123.35  
108.99  
108.65  
101.63  
42.37

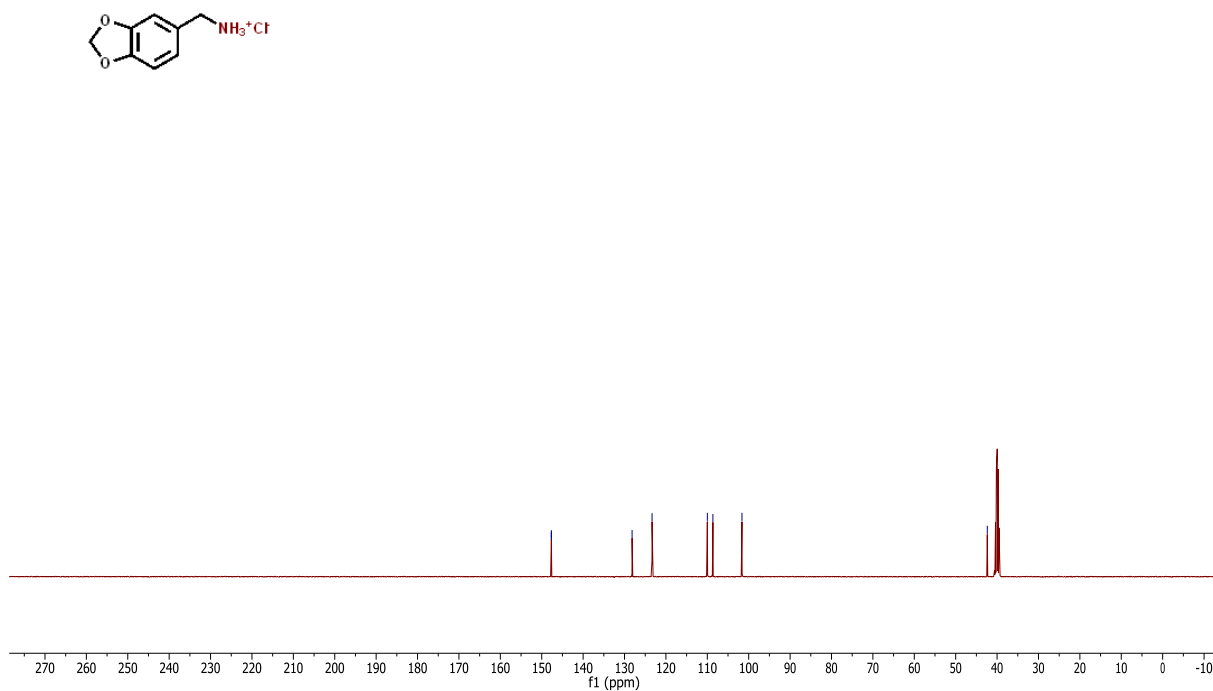

**Supplementary Figure 45. <sup>13</sup>C NMR (101 MHz, DMSO-d<sub>6</sub>)**

190107.407.10.fid  
Kathir KM22-161  
Au1H DMSO {C:\Bruker\TopSpin3.5pl6} 1901 7

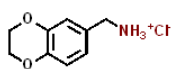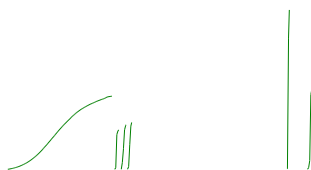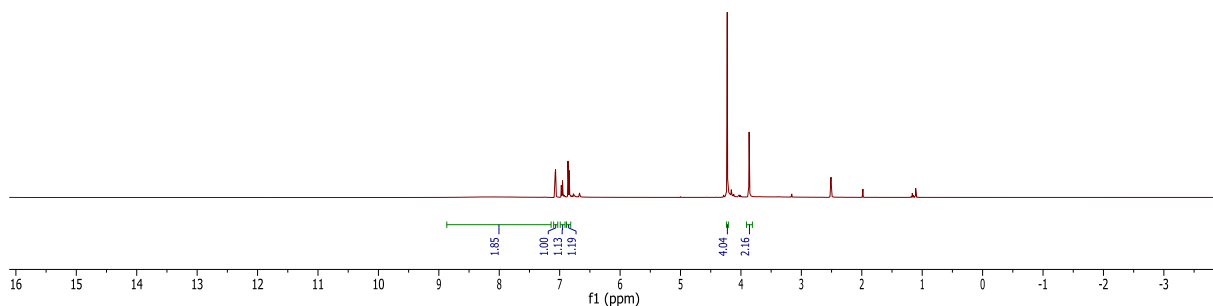

**Supplementary Figure 46. <sup>1</sup>H NMR (400 MHz, DMSO-d<sub>6</sub>)**

190107.407.11.fid  
Kathir KM22-161  
Au13C DMSO {C:\Bruker\TopSpin3.5pl6} 1901 7

163.81  
163.57  
127.45  
122.54  
118.40  
117.45  
64.56  
64.52  
42.05

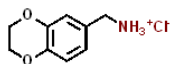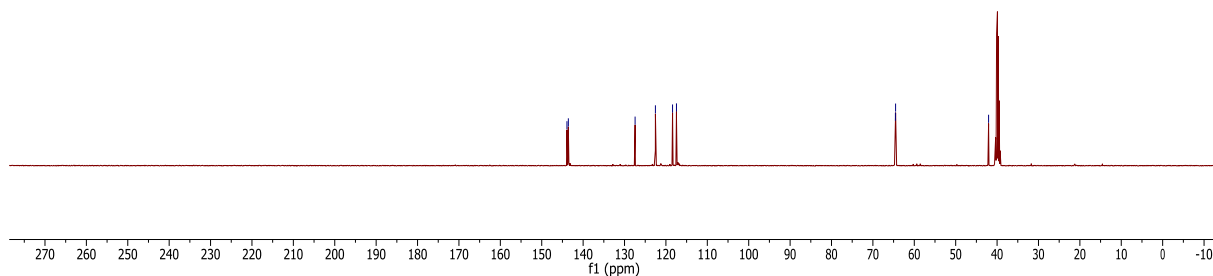

**Supplementary Figure 47. <sup>13</sup>C NMR (101 MHz, DMSO-d<sub>6</sub>)**

190107.405.10.fid  
Kathir KM22-178  
Au1H DMSO {C:\Bruker\TopSpin3.5pl6} 1901 5

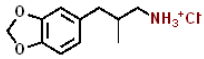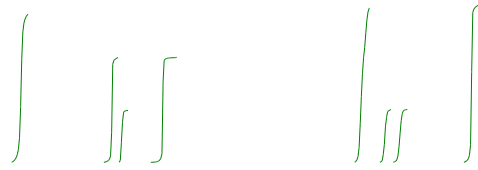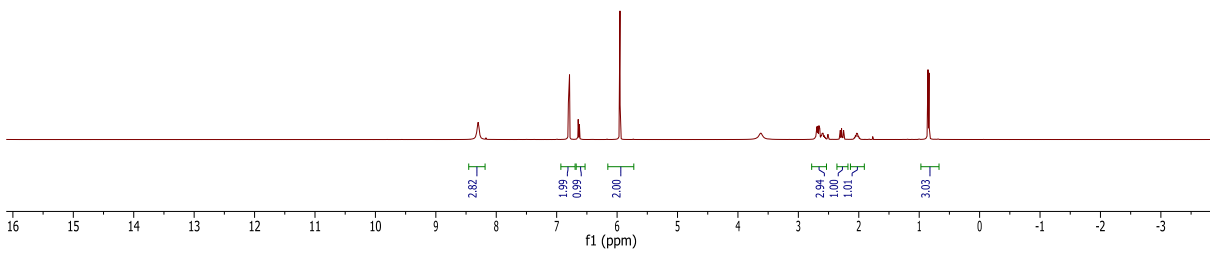

**Supplementary Figure 48. <sup>1</sup>H NMR (400 MHz, DMSO-d<sub>6</sub>)**

190107.405.11.fid  
Kathir KM22-178  
Au13C DMSO {C:\Bruker\TopSpin3.5pl6} 1901 5

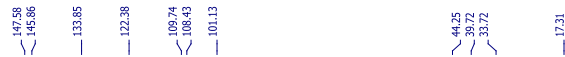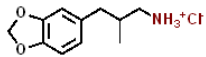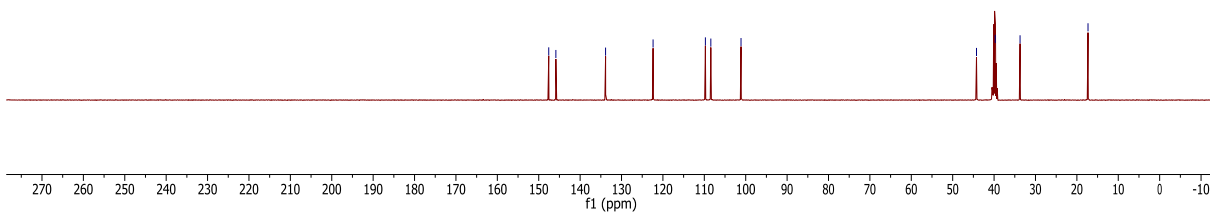

**Supplementary Figure 49. <sup>13</sup>C NMR (101 MHz, DMSO-d<sub>6</sub>)**

190107.417.10.fid  
Kathir KM22-325  
Au1H DMSO {C:\Bruker\TopSpin3.5pl6} 1901 17

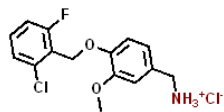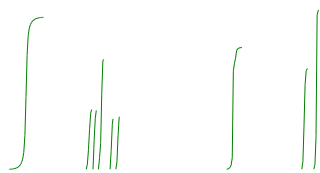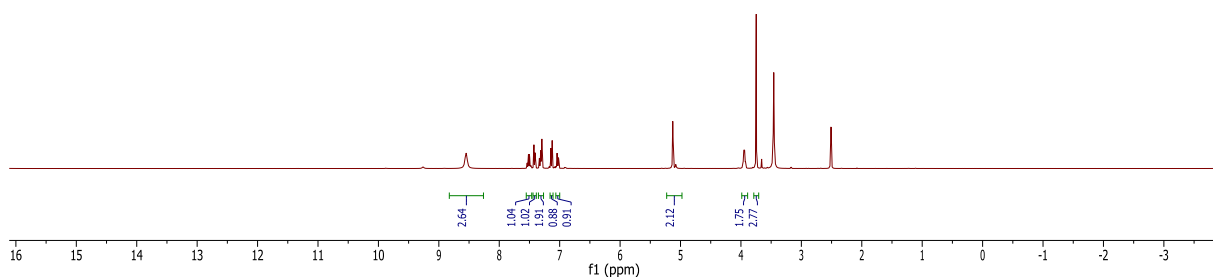

Supplementary Figure 50. <sup>1</sup>H NMR (400 MHz, DMSO-d<sub>6</sub>)

190107.417.11.fid  
Kathir KM22-325  
Au13C DMSO {C:\Bruker\TopSpin3.5pl6} 1901 17

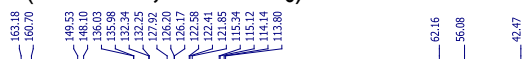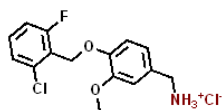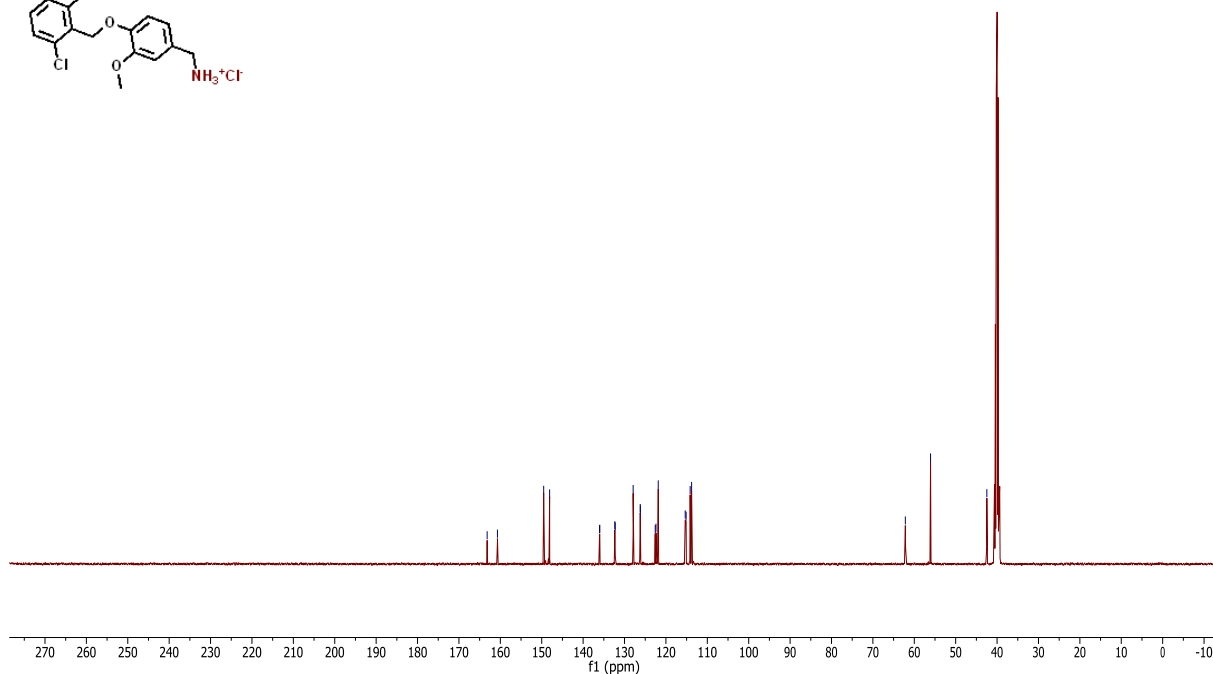

Supplementary Figure 51. <sup>13</sup>C NMR (101 MHz, DMSO-d<sub>6</sub>)

190531.f318.11.fid  
Kathir KM22-325  
19F(H-entk) DMSO {C:\Bruker\TopSpin3.6.0} 1905 18

-113.48

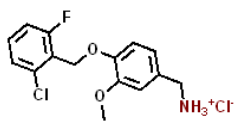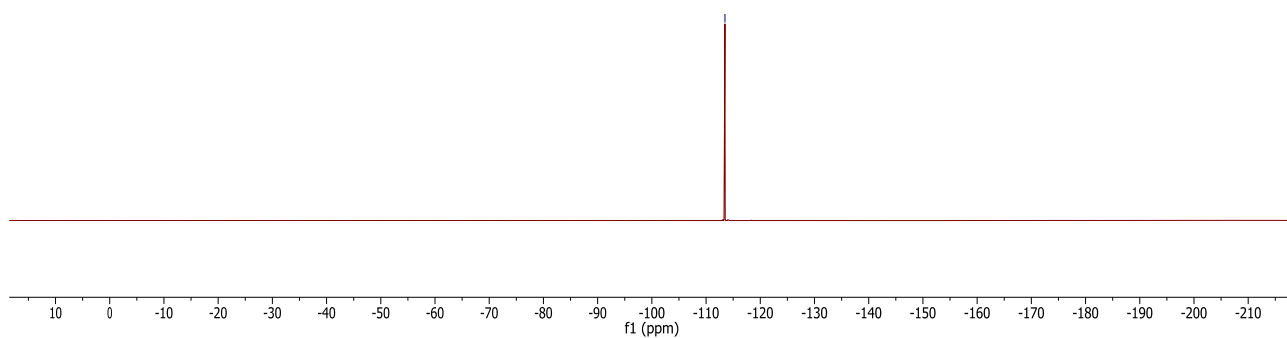

**Supplementary Figure 52. <sup>19</sup>F NMR (282 MHz, DMSO-d<sub>6</sub>)**

190107.414.10.fid  
Kathir KM22-283  
Au1H DMSO {C:\Bruker\TopSpin3.5pl6} 1901 14

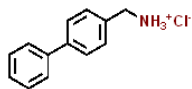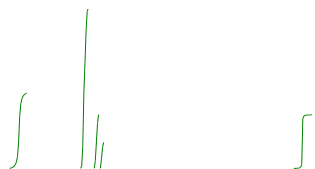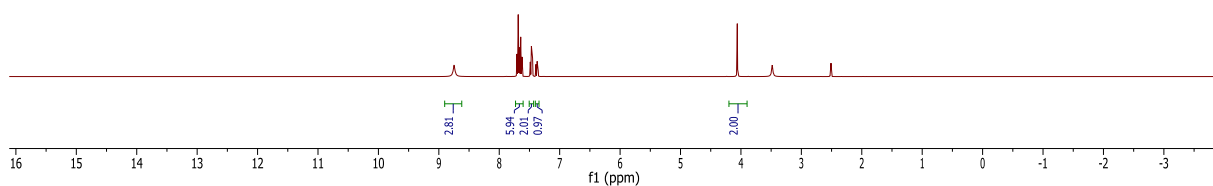

**Supplementary Figure 53. <sup>1</sup>H NMR (400 MHz, DMSO-d<sub>6</sub>)**

190107.414.11.fid  
Kathir KM22-283  
Au13C DMSO {C:\Bruker\TopSpin3.5pl6} 1901 14

146.59  
138.99  
133.74  
130.12  
129.45  
128.12  
127.19  
127.14

42.26

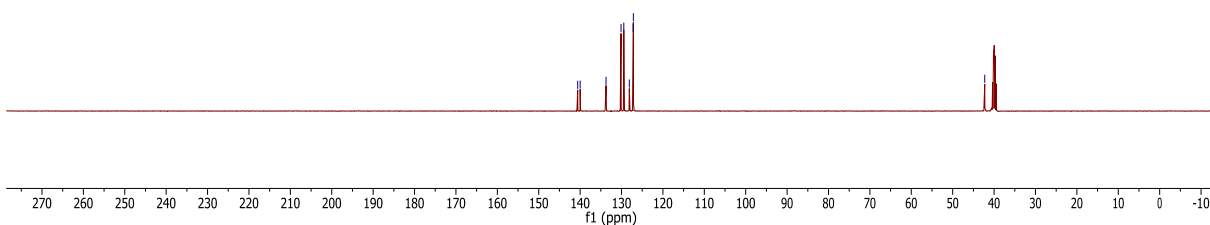

Supplementary Figure 54. <sup>13</sup>C NMR (101 MHz, DMSO-d<sub>6</sub>)

190111.f328.10.fid  
Kathir KM22-378  
PROTON DMSO {C:\Bruker\TopSpin3.6.0} 1901 28

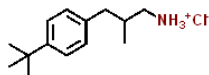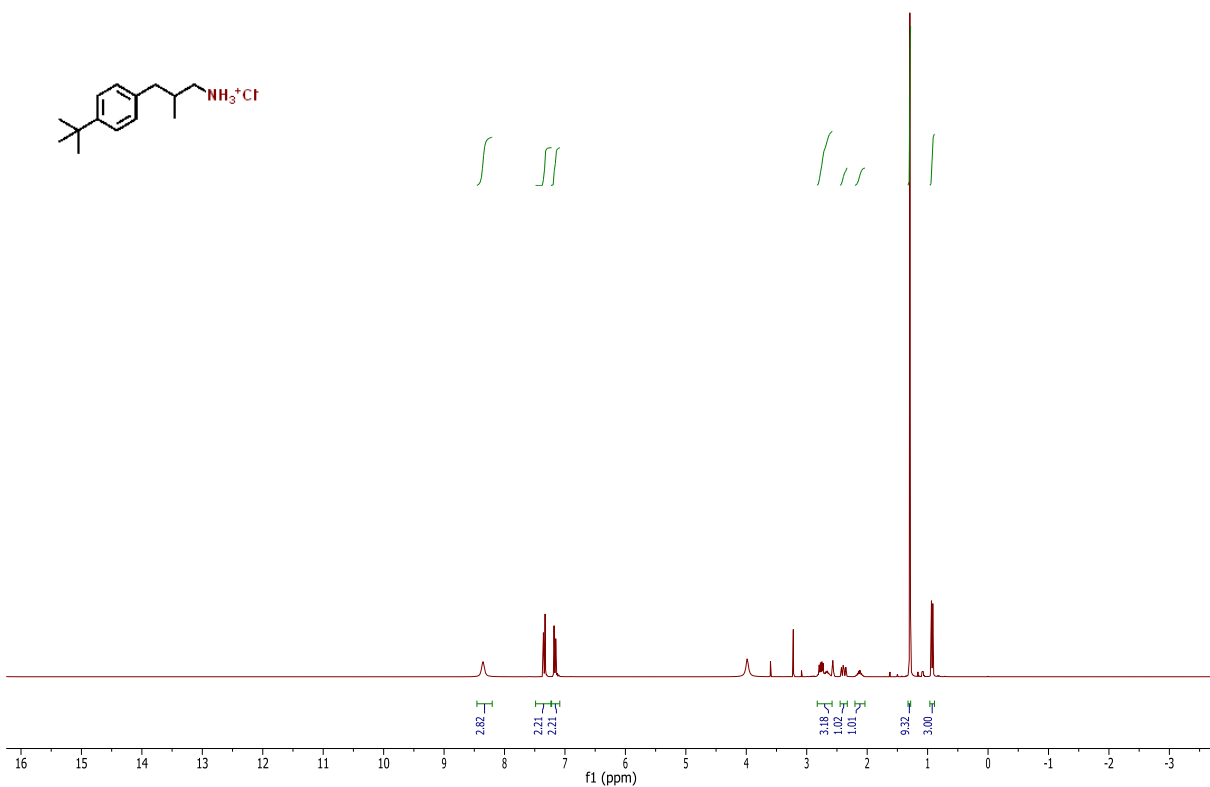

Supplementary Figure 55. <sup>1</sup>H NMR (300 MHz, DMSO-d<sub>6</sub>)

190111.f328.11.fid  
Kathir KM22-378  
C13CPD DMSO {C:\Bruker\TopSpin3.6.0} 1901 28

146.65

136.95

129.16

125.39

49.06

41.38

34.50

33.54

31.65

17.46

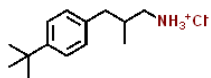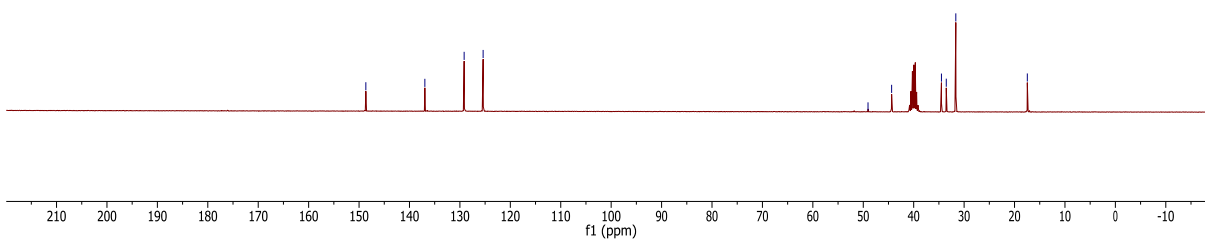

Supplementary Figure 56. <sup>13</sup>C NMR (75 MHz, DMSO-d<sub>6</sub>)

190111.f325.10.fid  
Kathir KM22-380  
PROTON DMSO {C:\Bruker\TopSpin3.6.0} 1901 25

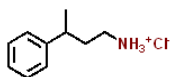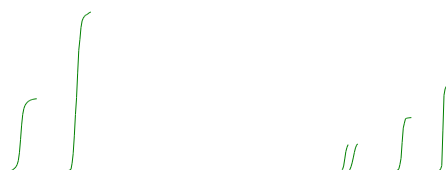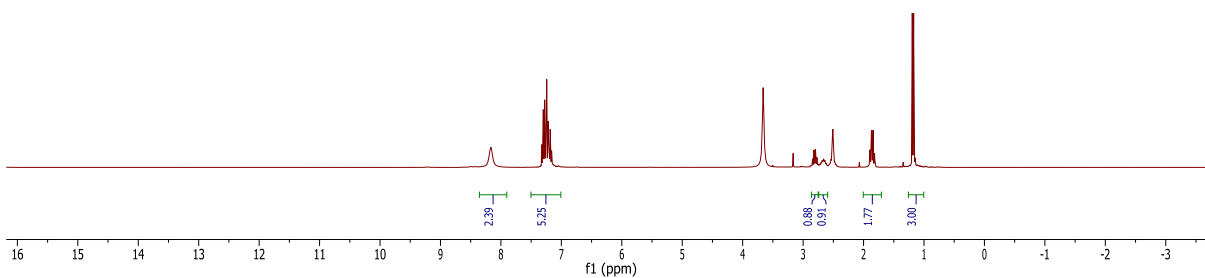

Supplementary Figure 57. <sup>1</sup>H NMR (300 MHz, DMSO-d<sub>6</sub>)

190111.f325.11.fid  
Kathir KM22-380  
C13CPD DMSO {C:\Bruker\TopSpin3.6.0} 1901 25

146.28

128.93  
127.24  
126.69

37.79  
36.84  
35.44

22.49

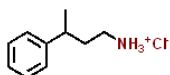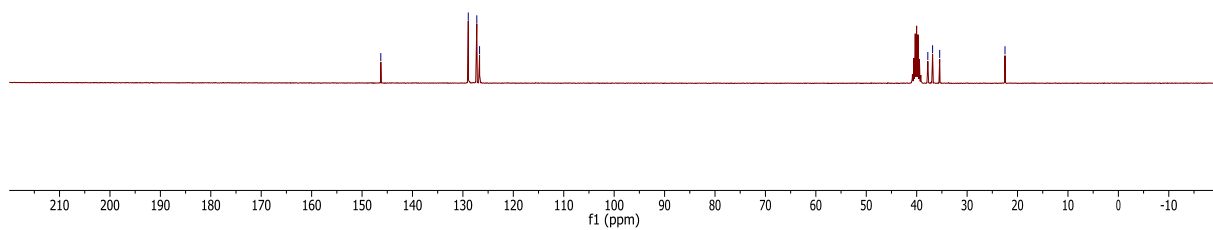

Supplementary Figure 58. <sup>13</sup>C NMR (75 MHz, DMSO-*d*<sub>6</sub>)

190121.326.10.fid  
Kathir KM22-446  
Au1H DMSO {C:\Bruker\TopSpin3.6.0} 1901 26

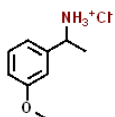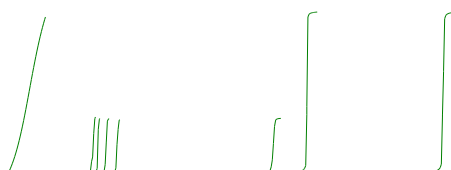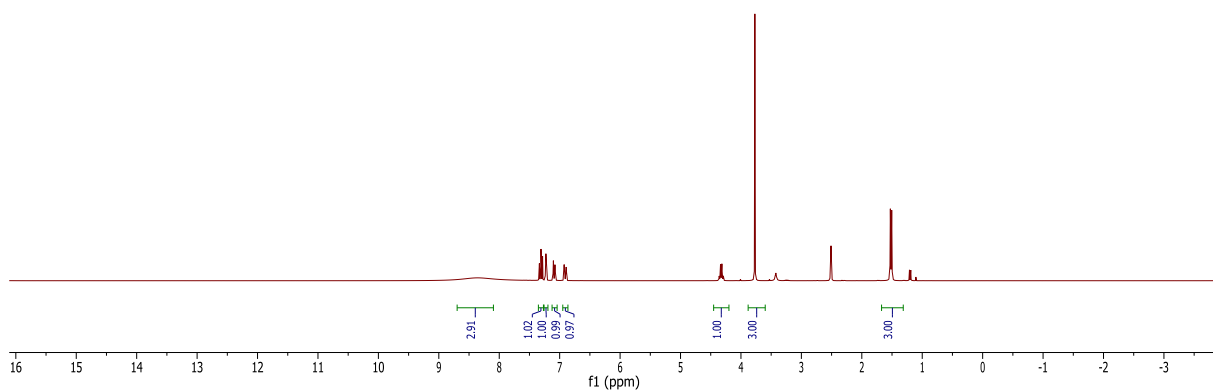

Supplementary Figure 59. <sup>1</sup>H NMR (300 MHz, DMSO-*d*<sub>6</sub>)



190121.326.11.fid  
Kathir KM22-446  
Au13C DMSO {C:\Bruker\TopSpin3.6.0} 1901 26

159.85  
141.55  
130.18  
119.34  
114.19  
113.05  
55.70  
50.48  
21.37

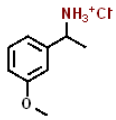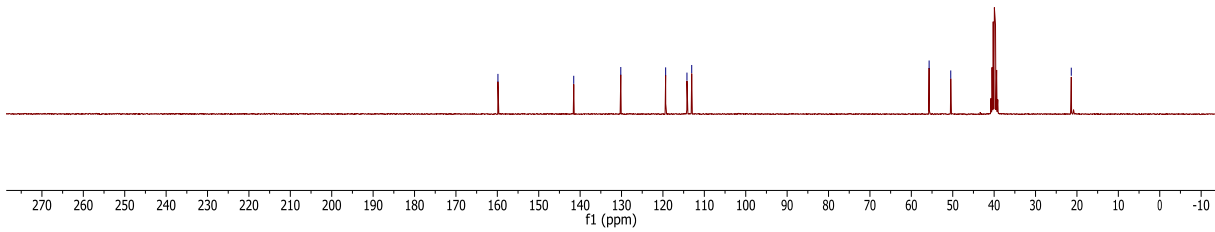

Supplementary Figure 60.  $^{13}\text{C}$  NMR (75 MHz,  $\text{DMSO-d}_6$ )

190114.407.10.fid  
Kathir KM22-286  
Au1H DMSO {C:\Bruker\TopSpin3.5pl6} 1901 7

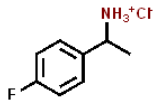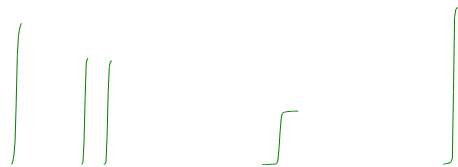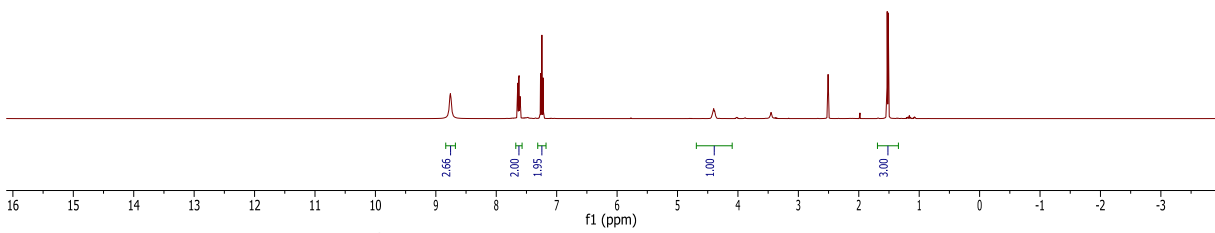

Supplementary Figure 61.  $^1\text{H}$  NMR (400 MHz,  $\text{DMSO-d}_6$ )

190114.407.11.fid  
Kathir KM22-286  
Au13C DMSO {C:\Bruker\TopSpin3.5pl6} 1901 7

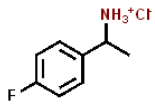

163.55  
161.12  
136.21  
136.18  
129.75  
128.67  
115.95  
115.74  
49.80  
21.25

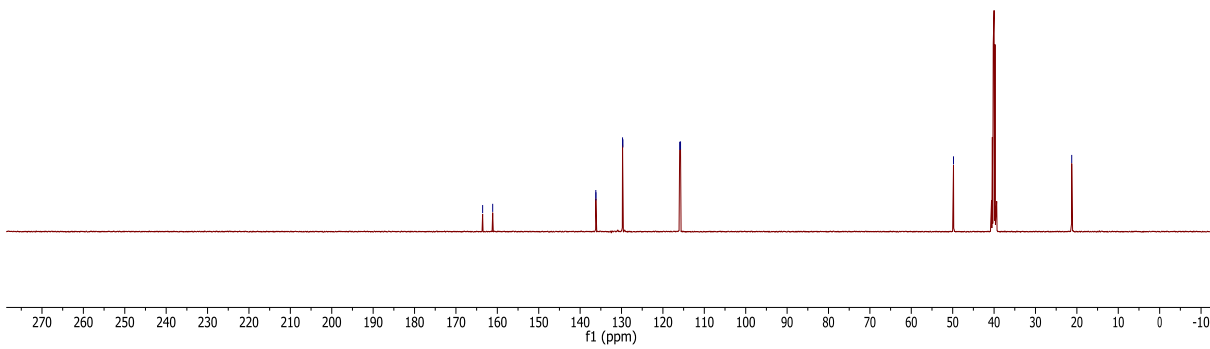

**Supplementary Figure 62.** <sup>13</sup>C NMR (101 MHz, DMSO-*d*<sub>6</sub>)

190531.f319.11.fid  
Kathir KM22-286  
19F(H-entk) DMSO {C:\Bruker\TopSpin3.6.0} 1905 19

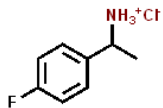

-113.92

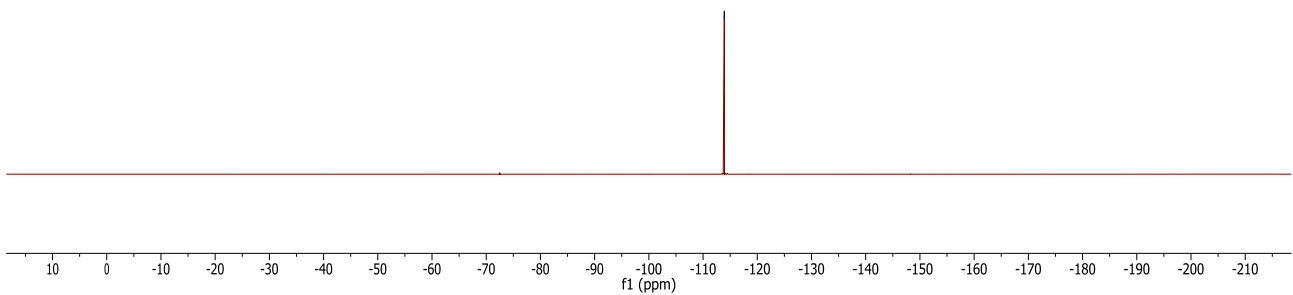

**Supplementary Figure 63.** <sup>19</sup>F NMR (282 MHz, DMSO-*d*<sub>6</sub>)

190111.f331.10.fid  
Kathir KM22-279  
PROTON DMSO {C:\Bruker\TopSpin3.6.0} 1901 31

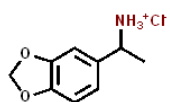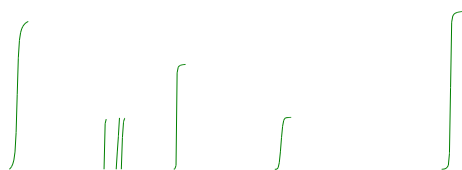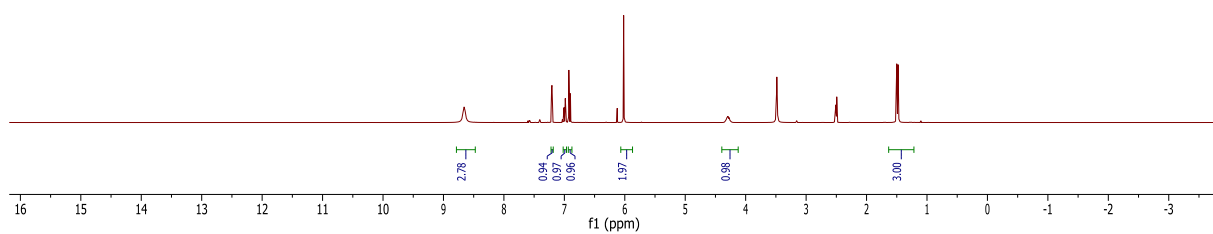

Supplementary Figure 64. <sup>1</sup>H NMR (300 MHz, DMSO-*d*<sub>6</sub>)

190111.f331.11.fid  
Kathir KM22-279  
C13CPD DMSO {C:\Bruker\TopSpin3.6.0} 1901 31

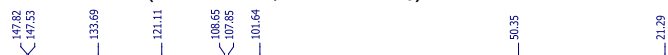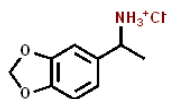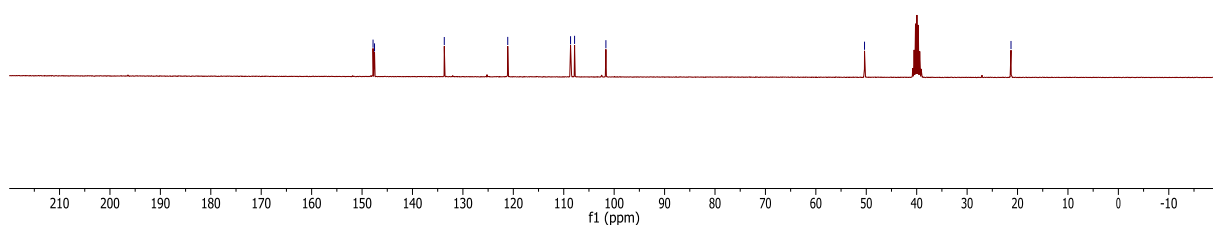

Supplementary Figure 65. <sup>13</sup>C NMR (75 MHz, DMSO-*d*<sub>6</sub>)

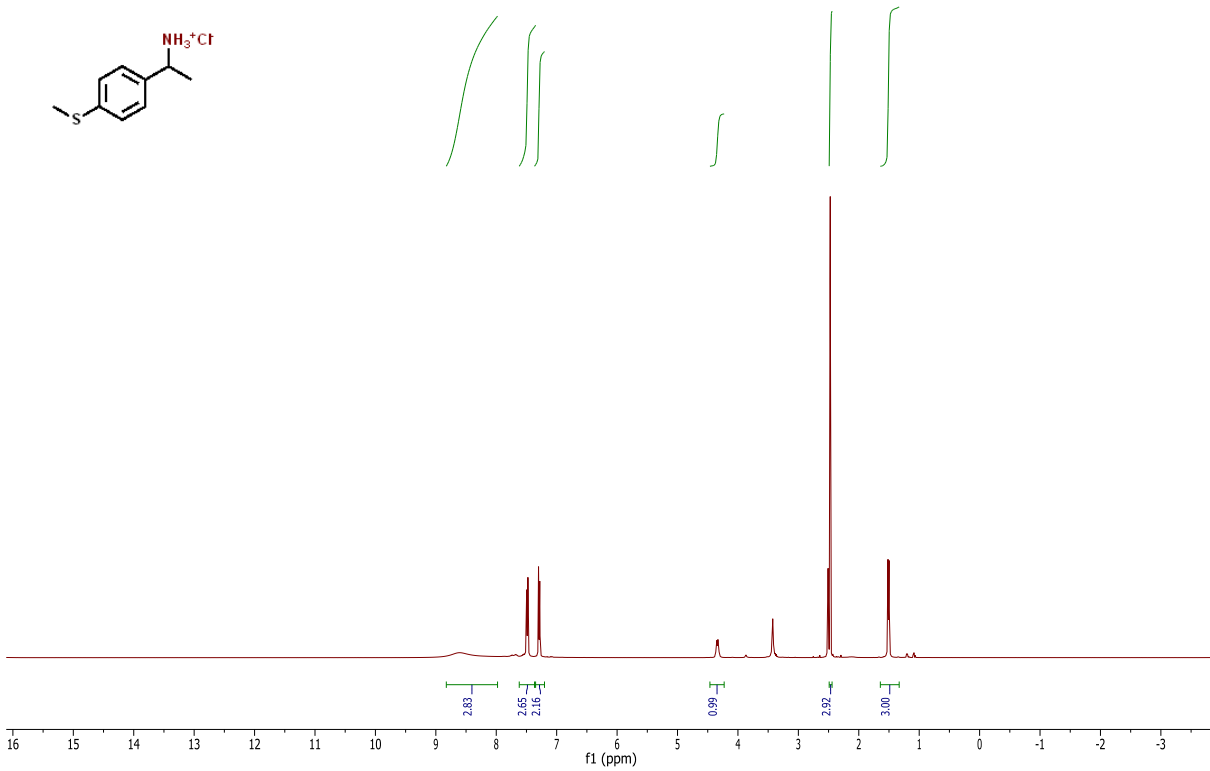

Supplementary Figure 66. <sup>1</sup>H NMR (400 MHz, DMSO-d<sub>6</sub>)

190114.414.11.fid  
Kathir KM22-402  
Au13C DMSO {C:\Bruker\TopSpin3.5pl6} 1901 14

138.87 136.37 128.06 126.44 50.09 21.25 15.28

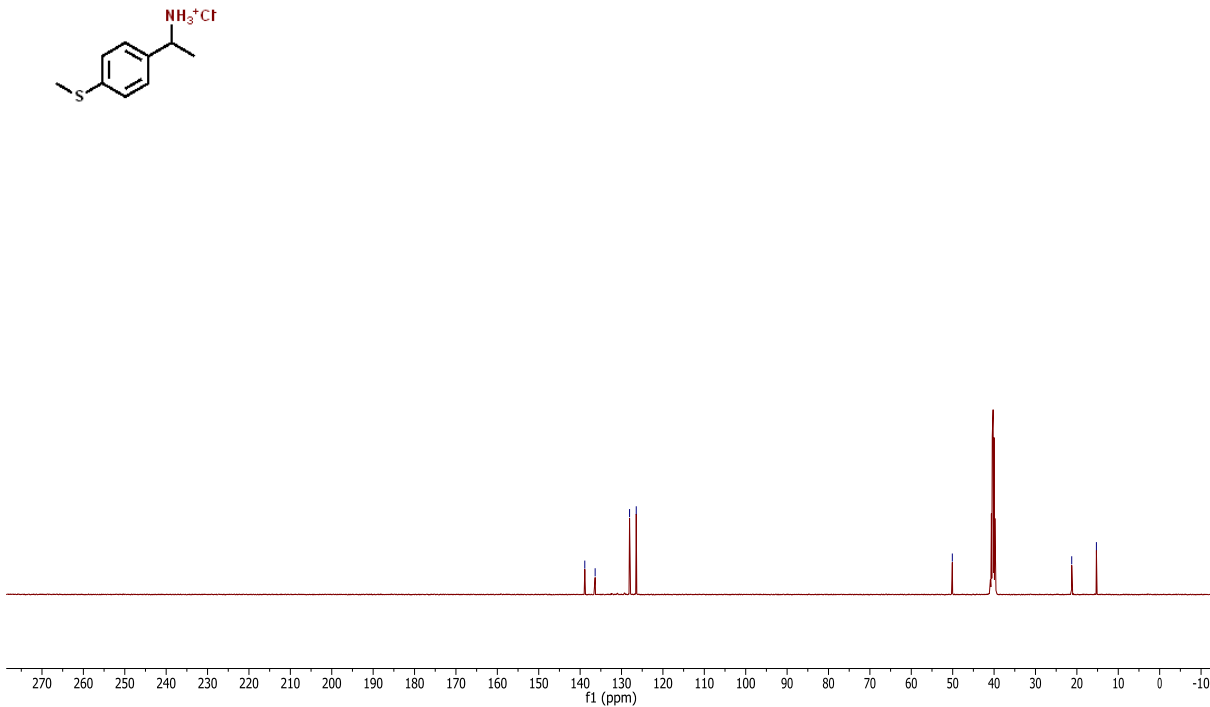

Supplementary Figure 67. <sup>13</sup>C NMR (101 MHz, DMSO-d<sub>6</sub>)

190111.f332.10.fid  
Kathir KM22-403  
PROTON DMSO {C:\Bruker\TopSpin3.6.0} 1901 32

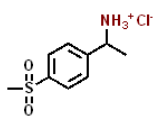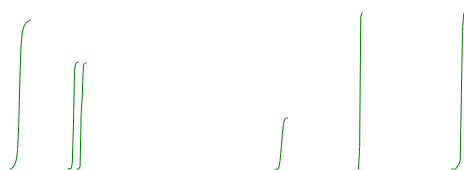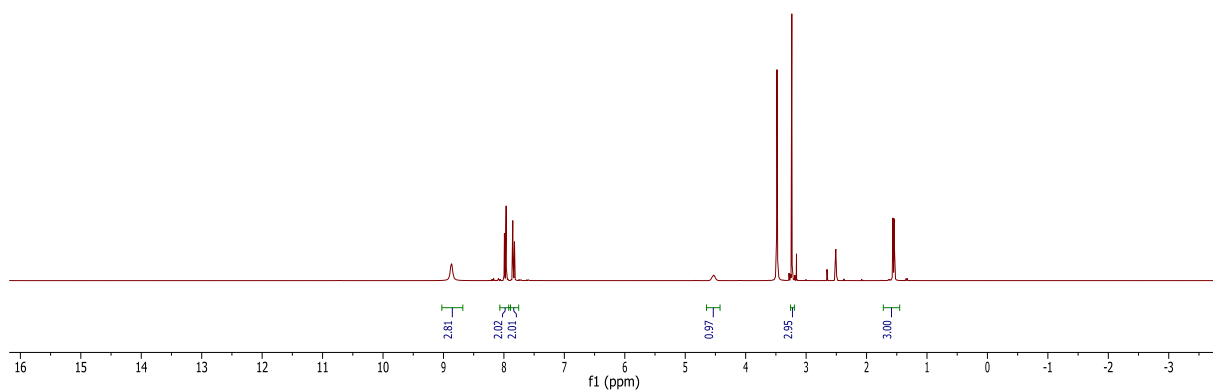

Supplementary Figure 68. <sup>1</sup>H NMR (300 MHz, DMSO-d<sub>6</sub>)

190111.f332.11.fid  
Kathir KM22-403  
C13CPD DMSO {C:\Bruker\TopSpin3.6.0} 1901 32

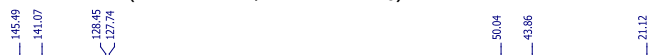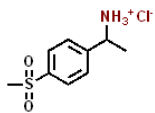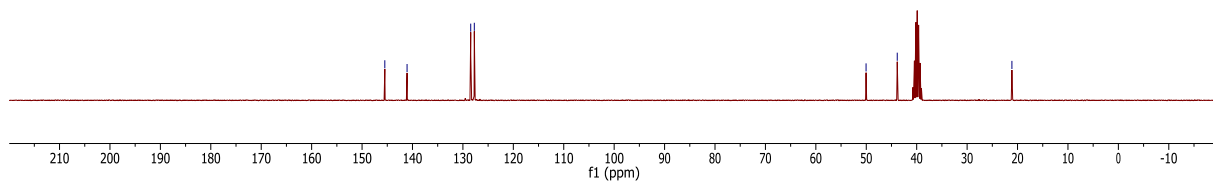

Supplementary Figure 69. <sup>13</sup>C NMR (75 MHz, DMSO-d<sub>6</sub>)

190114.404.10.fid  
Kathir KM22-213  
Au1H DMSO {C:\Bruker\TopSpin3.5pl6} 1901 4

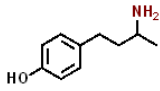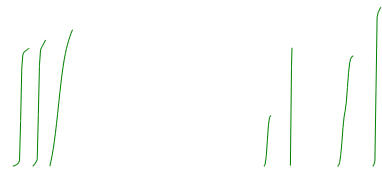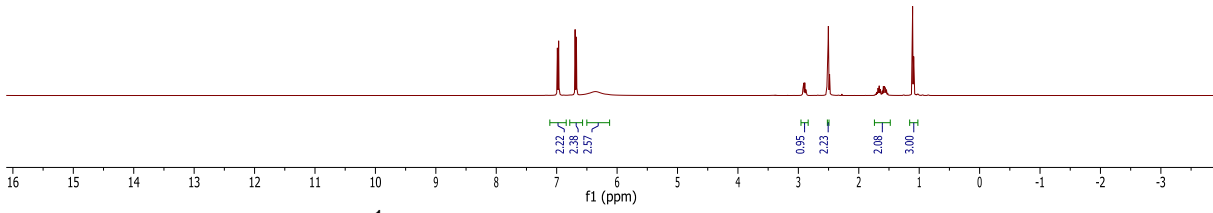

**Supplementary Figure 70. <sup>1</sup>H NMR (400 MHz, DMSO-d<sub>6</sub>)**

190114.404.11.fid  
Kathir KM22-213  
Au13C DMSO {C:\Bruker\TopSpin3.5pl6} 1901 4

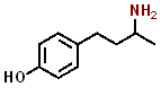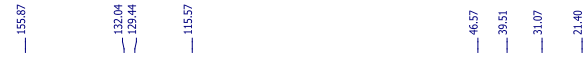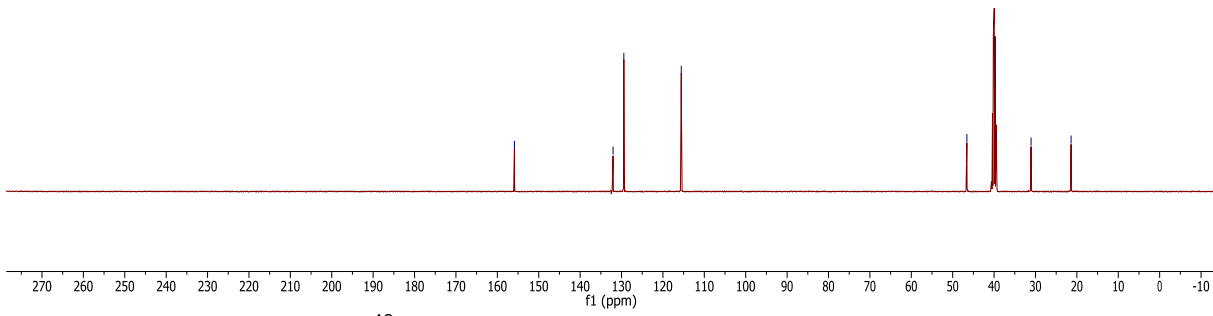

**Supplementary Figure 71. <sup>13</sup>C NMR (101 MHz, DMSO-d<sub>6</sub>)**

190111.f330.10.fid  
Kathir KM22-400  
PROTON DMSO {C:\Bruker\TopSpin3.6.0} 1901 30

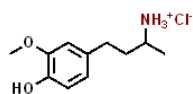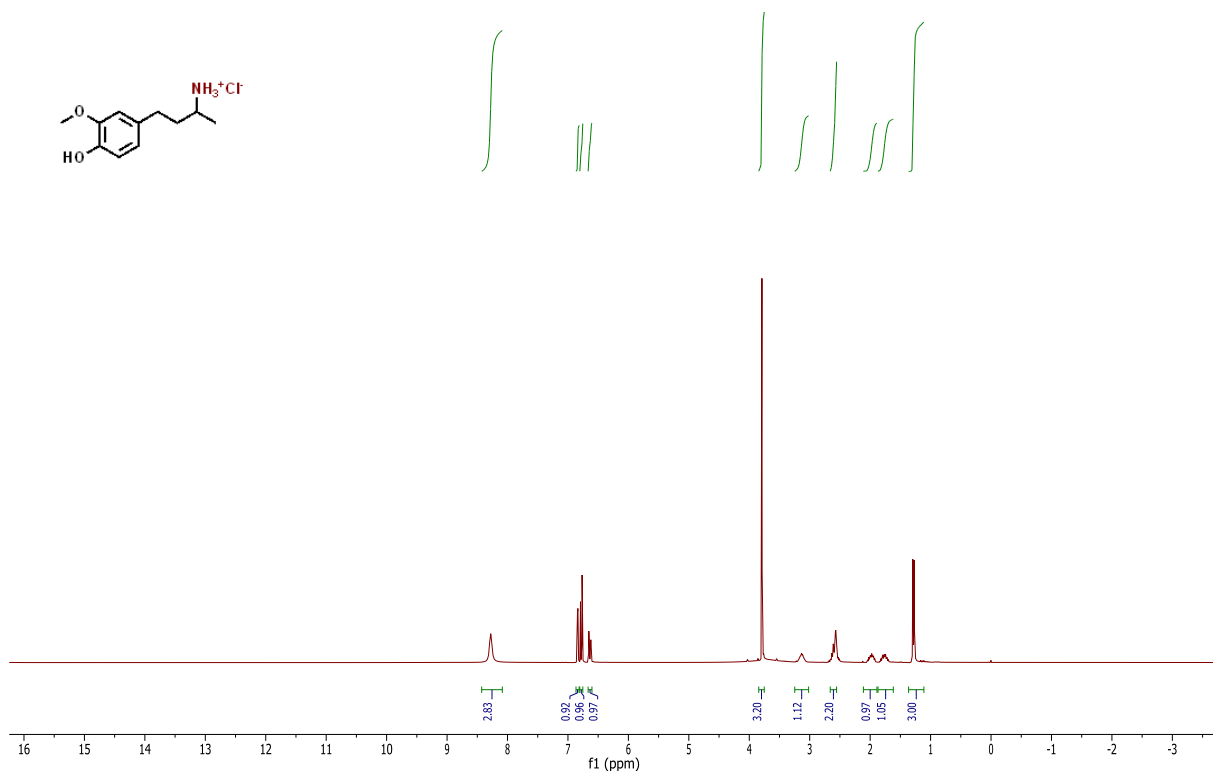

Supplementary Figure 72. <sup>1</sup>H NMR (300 MHz, DMSO-d<sub>6</sub>)

190111.f330.11.fid  
Kathir KM22-400  
C13CPD DMSO {C:\Bruker\TopSpin3.6.0} 1901 30

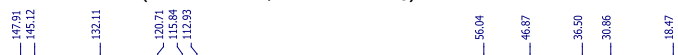

Supplementary Figure 73. <sup>13</sup>C NMR (75 MHz, DMSO-d<sub>6</sub>)

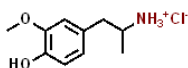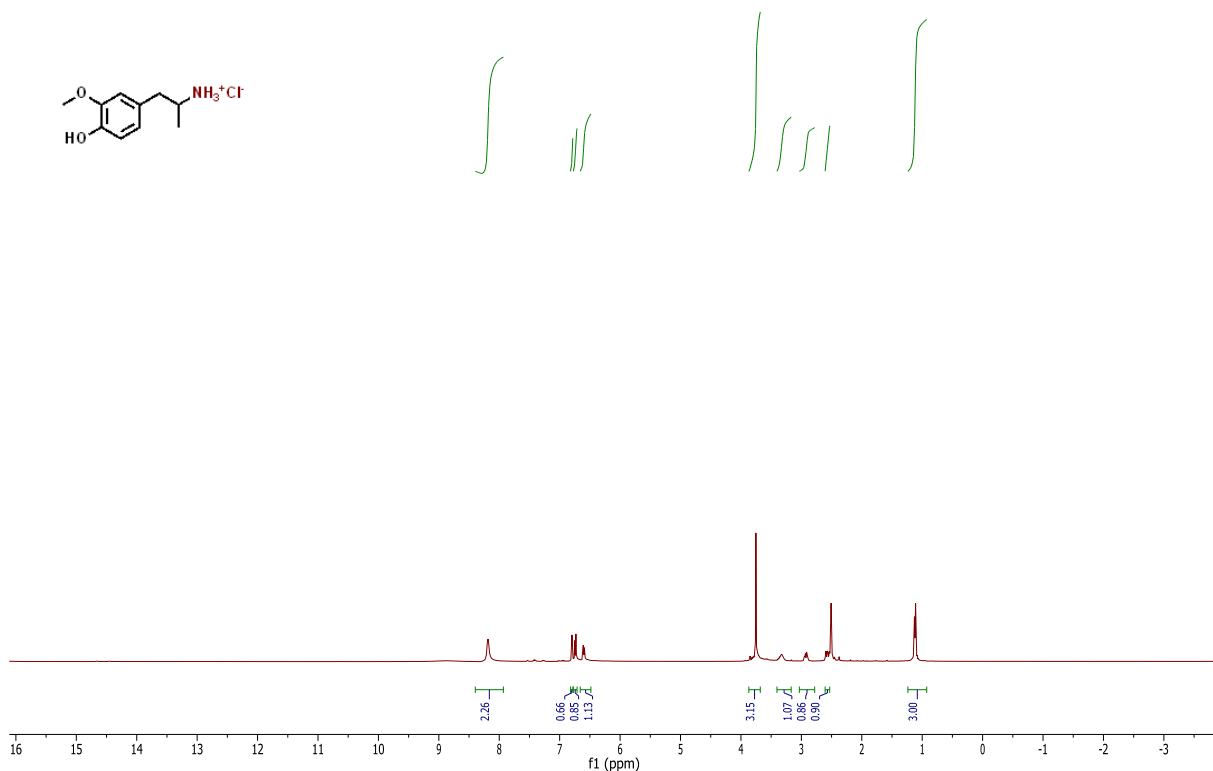

**Supplementary Figure 74. <sup>1</sup>H NMR (400 MHz, DMSO-d<sub>6</sub>)**

190124.421.11.fid  
Kathir KM22-445  
Au13C DMSO {C:\Bruker\TopSpin3.5pl6} 1901 21

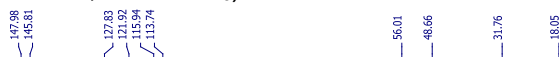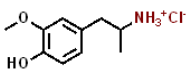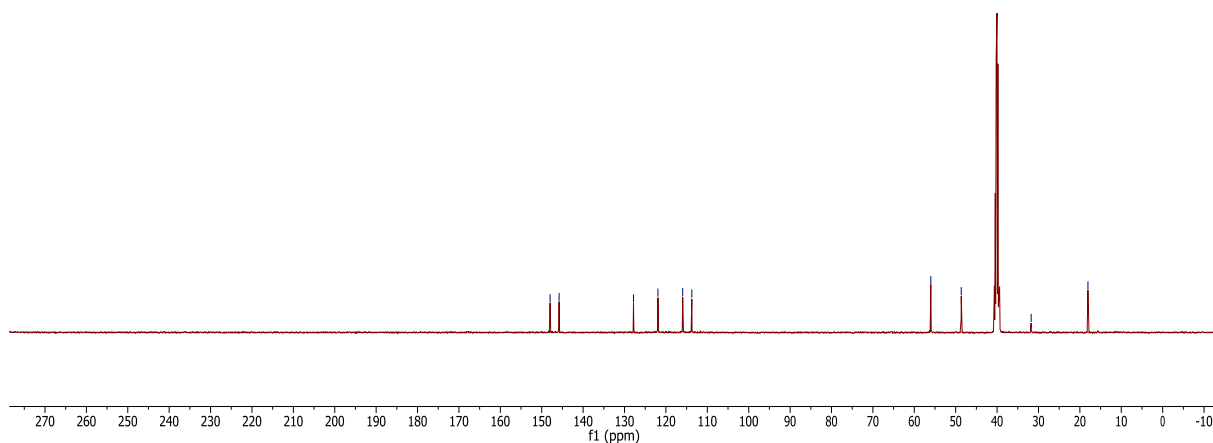

**Supplementary Figure 75. <sup>13</sup>C NMR (101 MHz, DMSO-d<sub>6</sub>)**



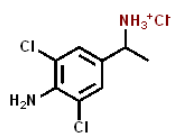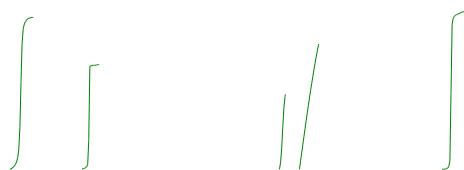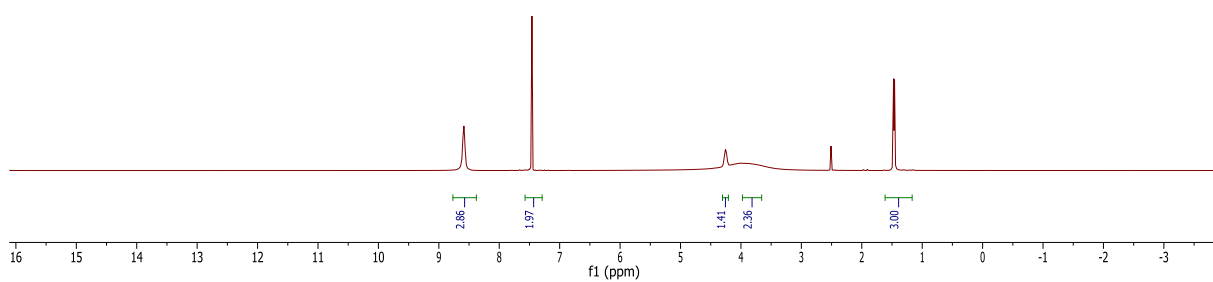

Supplementary Figure 76. <sup>1</sup>H NMR (400 MHz, DMSO-d<sub>6</sub>)

190114.412.11.fid  
Kathir KM22-370  
Au13C DMSO {C:\Bruker\TopSpin3.5pl6} 1901 12

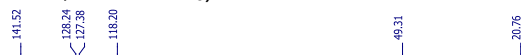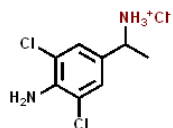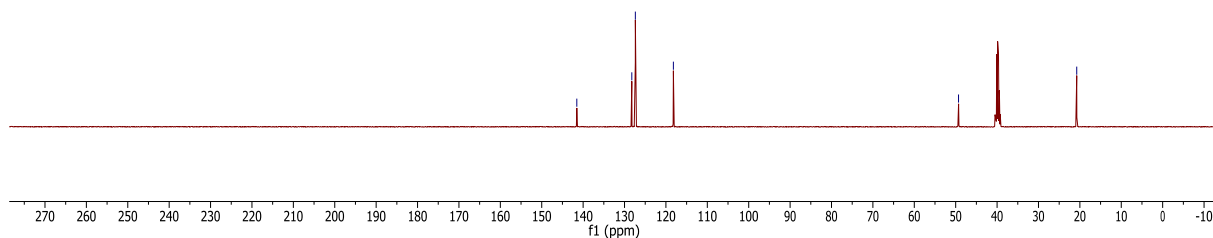

Supplementary Figure 77. <sup>13</sup>C NMR (101 MHz, DMSO-d<sub>6</sub>)

190114.415.10.fid  
Kathir KM22-412  
Au1H DMSO {C:\Bruker\TopSpin3.5pl6} 1901 15

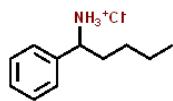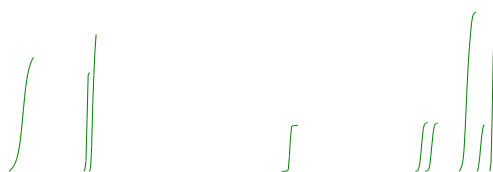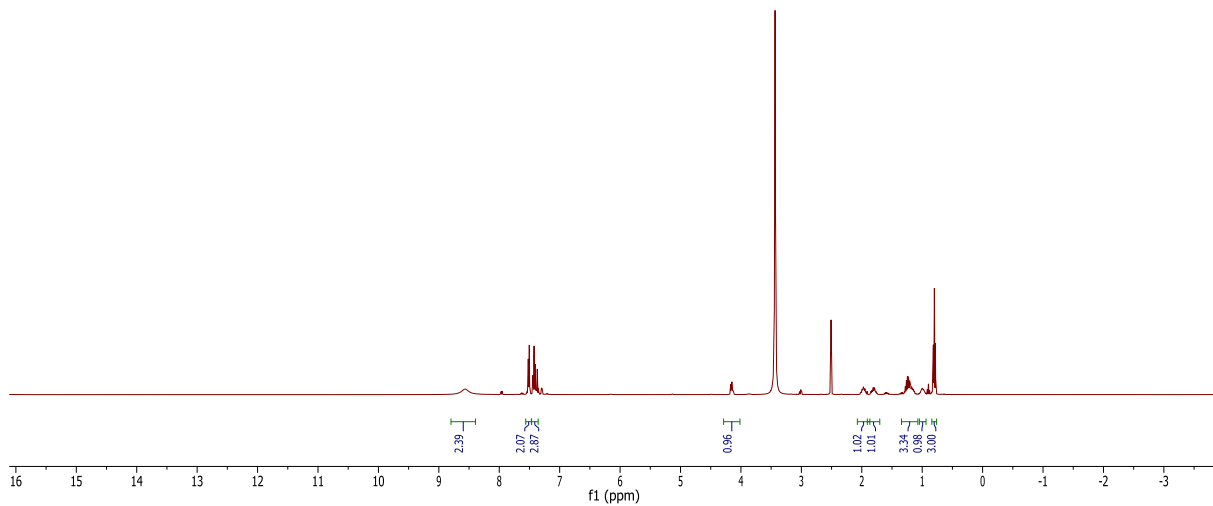

Supplementary Figure 78. <sup>1</sup>H NMR (400 MHz, DMSO-d<sub>6</sub>)

190114.415.11.fid  
Kathir KM22-412  
Au13C DMSO {C:\Bruker\TopSpin3.5pl6} 1901 15

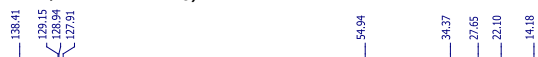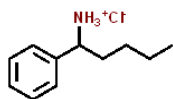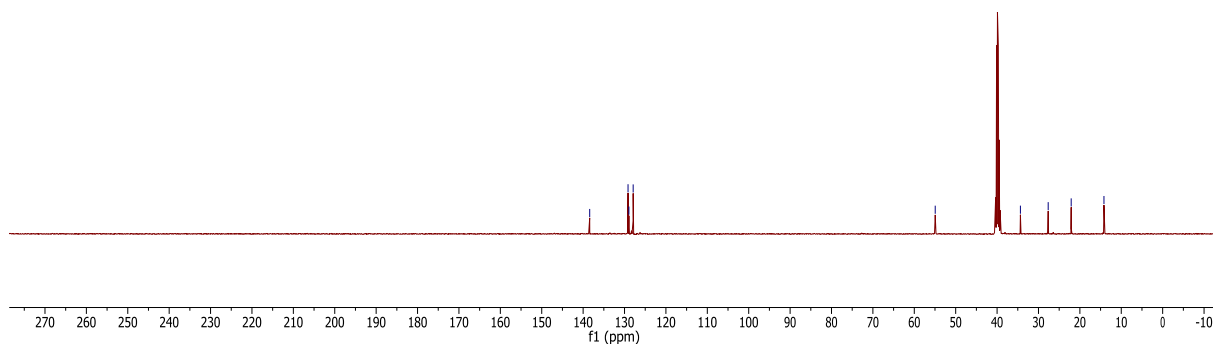

Supplementary Figure 79. <sup>13</sup>C NMR (101 MHz, DMSO-d<sub>6</sub>)

190111.f333.10.fid  
Kathir KM22-429  
PROTON DMSO {C:\Bruker\TopSpin3.6.0} 1901 33

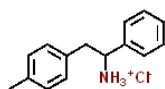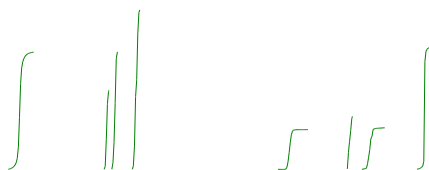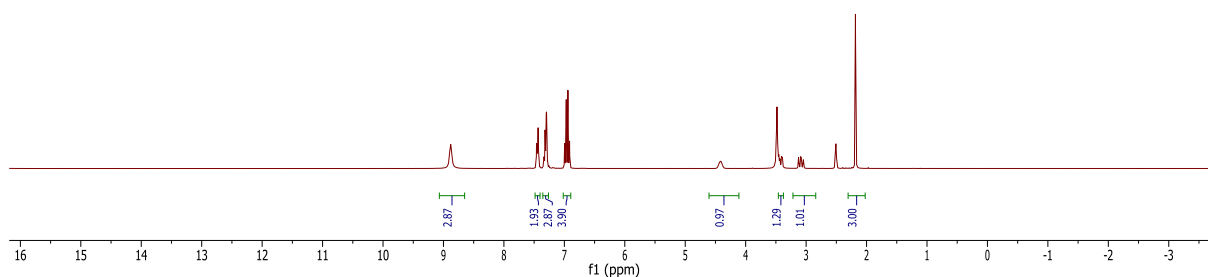

Supplementary Figure 80. <sup>1</sup>H NMR (300 MHz, DMSO-d<sub>6</sub>)

190111.f333.11.fid  
Kathir KM22-429  
C13CPD DMSO {C:\Bruker\TopSpin3.6.0} 1901 33

137.57  
135.97  
133.59  
129.56  
129.30  
128.88  
128.59  
128.39

56.44

40.25

21.07

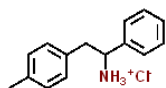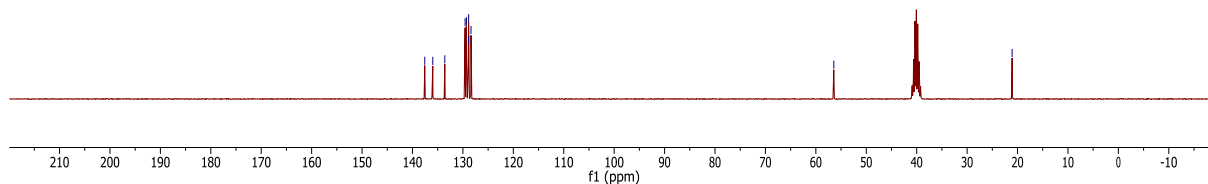

Supplementary Figure 81. <sup>13</sup>C NMR (75 MHz, DMSO-d<sub>6</sub>)

190114.418.10.fid  
Kathir KM22-365  
Au1H DMSO (C:\Bruker\TopSpin3.5pl6) 1901 18

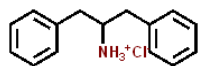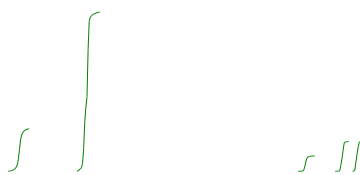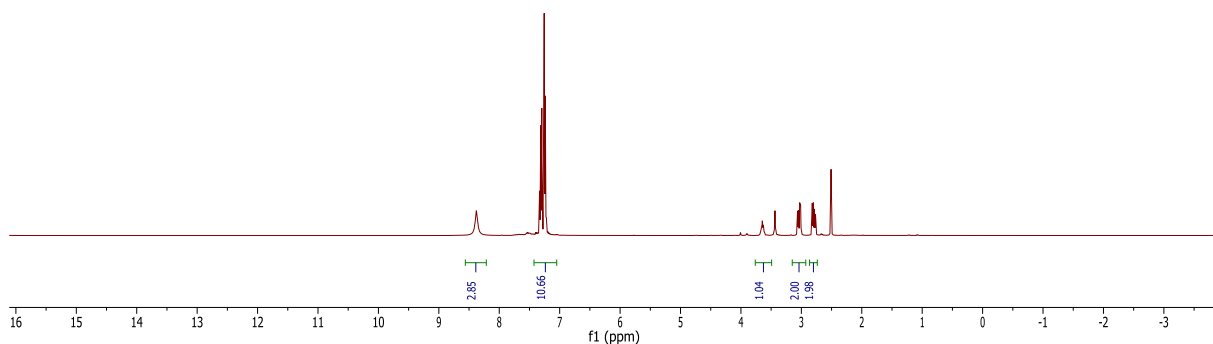

Supplementary Figure 82. <sup>1</sup>H NMR (400 MHz, DMSO-*d*<sub>6</sub>)

190114.418.11.fid  
Kathir KM22-365  
Au13C DMSO (C:\Bruker\TopSpin3.5pl6) 1901 18

136.95  
129.83  
129.06  
127.25

53.63

38.14

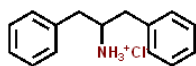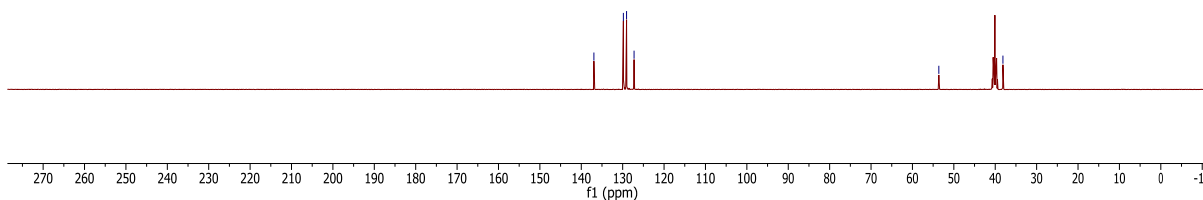

Supplementary Figure 83. <sup>13</sup>C NMR (101 MHz, DMSO-*d*<sub>6</sub>)

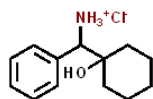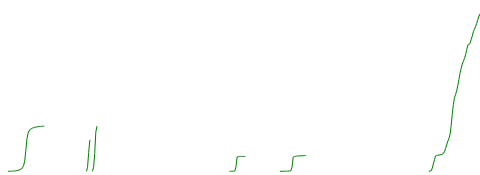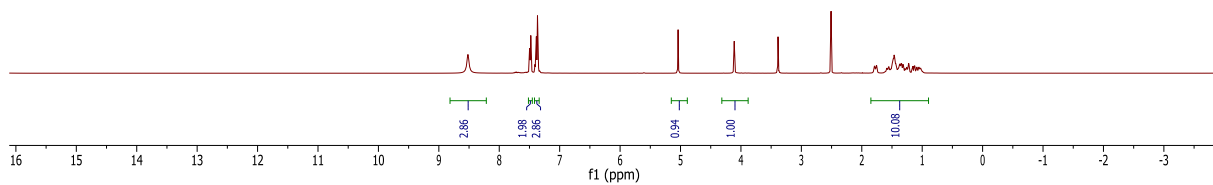

Supplementary Figure 84. <sup>1</sup>H NMR (400 MHz, DMSO-d<sub>6</sub>)

190114.416.11.fid  
Kathir KM22-399  
Au13C DMSO {C:\Bruker\TopSpin3.5pl6} 1901 16

135.85  
135.86  
138.63  
138.37

71.19  
63.23

34.87  
33.02  
25.47  
21.47  
21.12

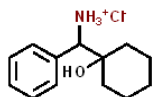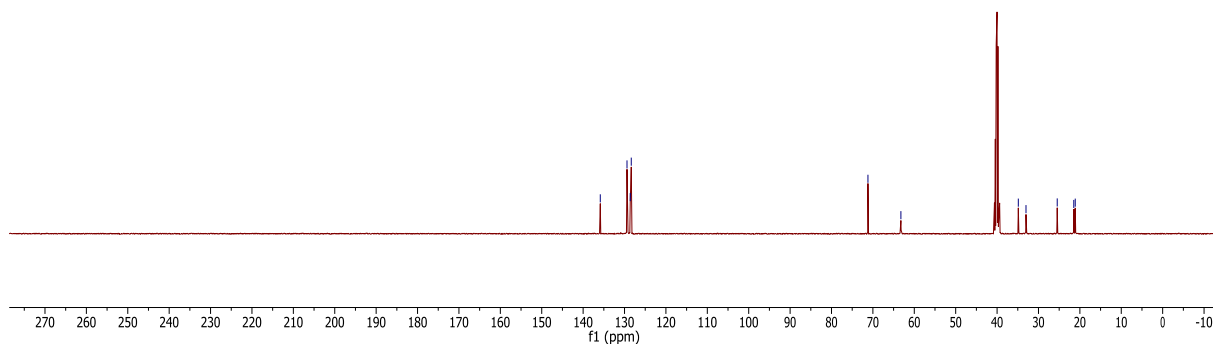

Supplementary Figure 85. <sup>13</sup>C NMR (101 MHz, DMSO-d<sub>6</sub>)

190114.417.10.fid  
Kathir KM22-396  
Au1H DMSO {C:\Bruker\TopSpin3.5pl6} 1901 17

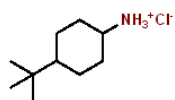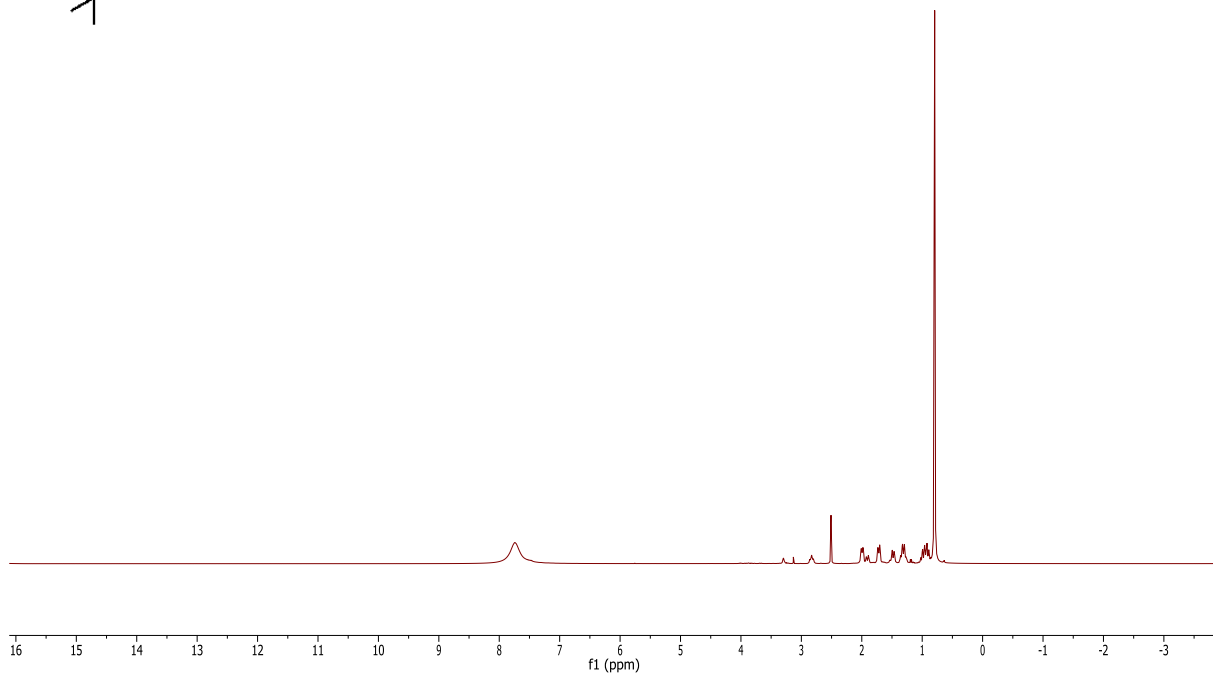

**Supplementary Figure 86.**  $^1\text{H}$  NMR (400 MHz, DMSO- $d_6$ )

190114.417.11.fid  
Kathir KM22-396  
Au13C DMSO {C:\Bruker\TopSpin3.5pl6} 1901 17

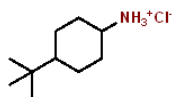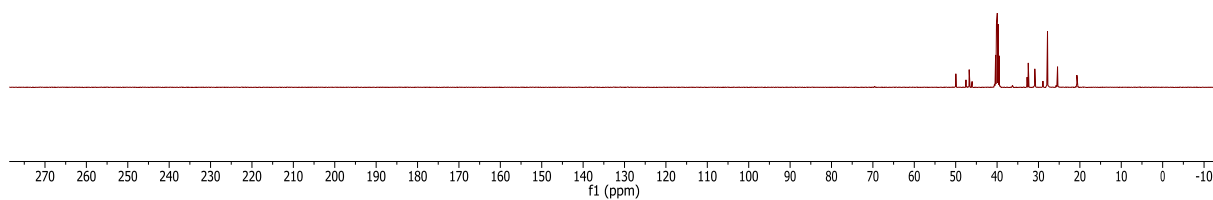

**Supplementary Figure 87.**  $^{13}\text{C}$  NMR (101 MHz, DMSO- $d_6$ )

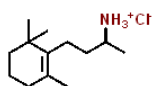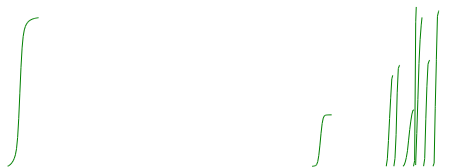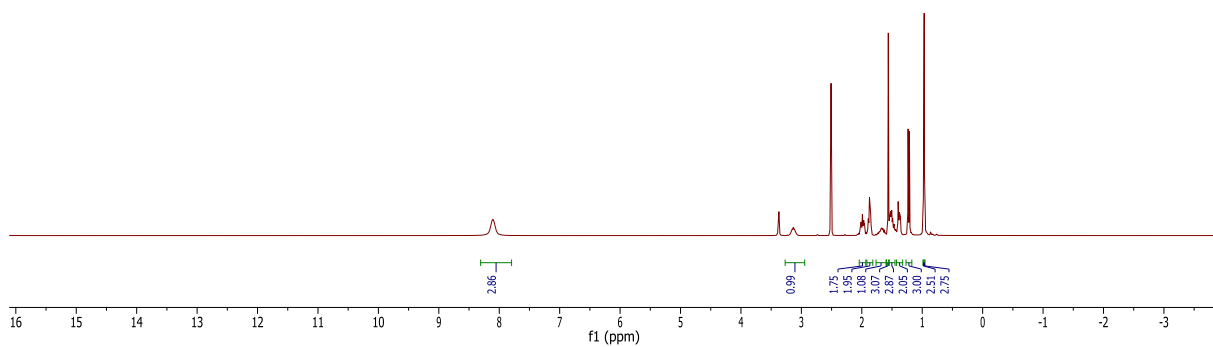

Supplementary Figure 88. <sup>1</sup>H NMR (300 MHz, DMSO-d<sub>6</sub>)

190121.336.11.fid  
Kathir KM22-436  
Au13C DMSO {C:\Bruker\TopSpin3.6.0} 1901 36

136.48  
127.33

47.71  
39.77  
35.20  
35.05  
32.69  
28.84  
24.59  
20.66  
18.44

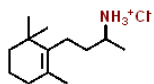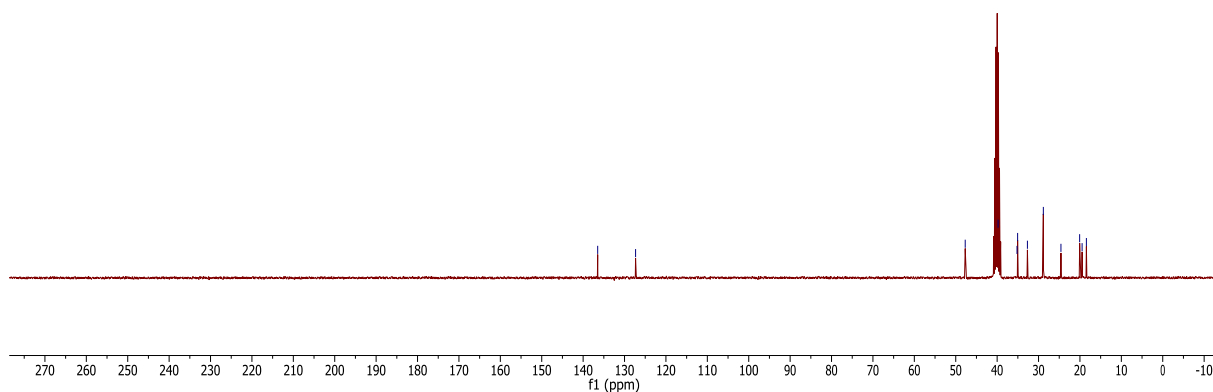

Supplementary Figure 89. <sup>13</sup>C NMR (75 MHz, DMSO-d<sub>6</sub>)

190111.f334.10.fid  
Kathir KM22-395  
PROTON DMSO {C:\Bruker\TopSpin3.6.0} 1901 34

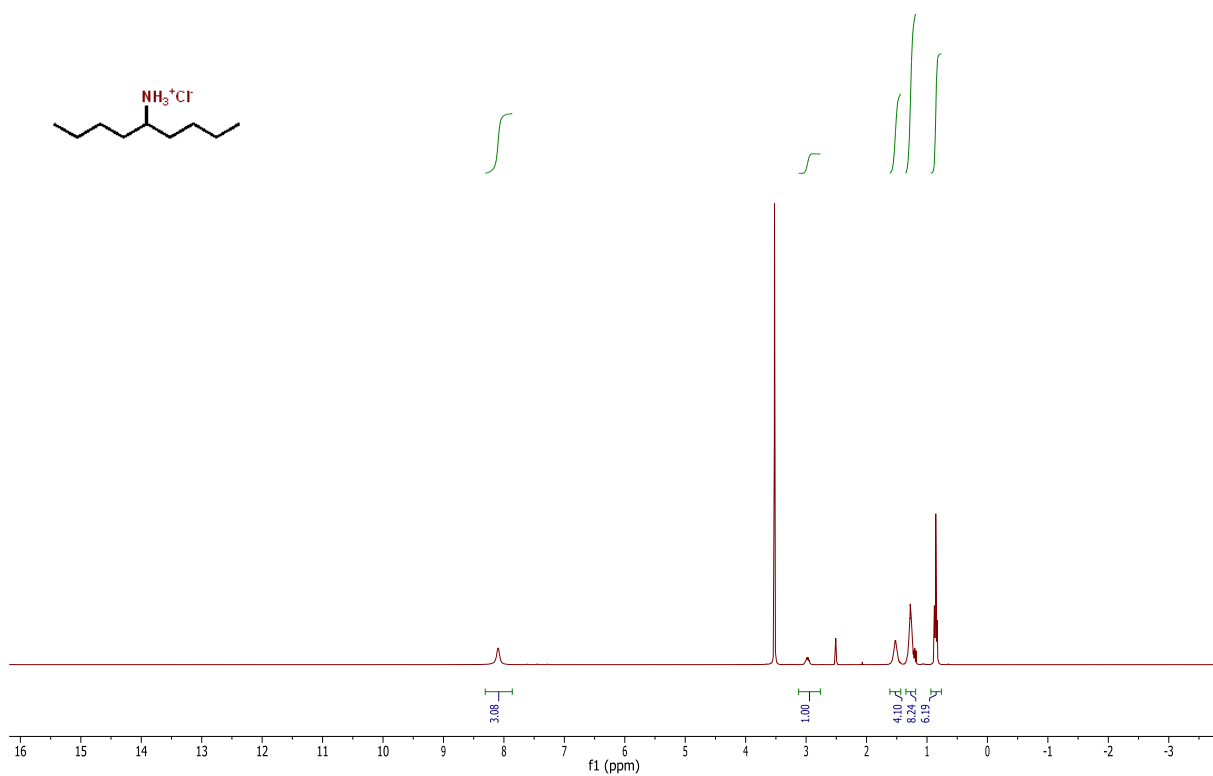

Supplementary Figure 90.  $^1\text{H}$  NMR (300 MHz, DMSO- $d_6$ )

190111.f334.11.fid  
Kathir KM22-395  
C13CPD DMSO {C:\Bruker\TopSpin3.6.0} 1901 34

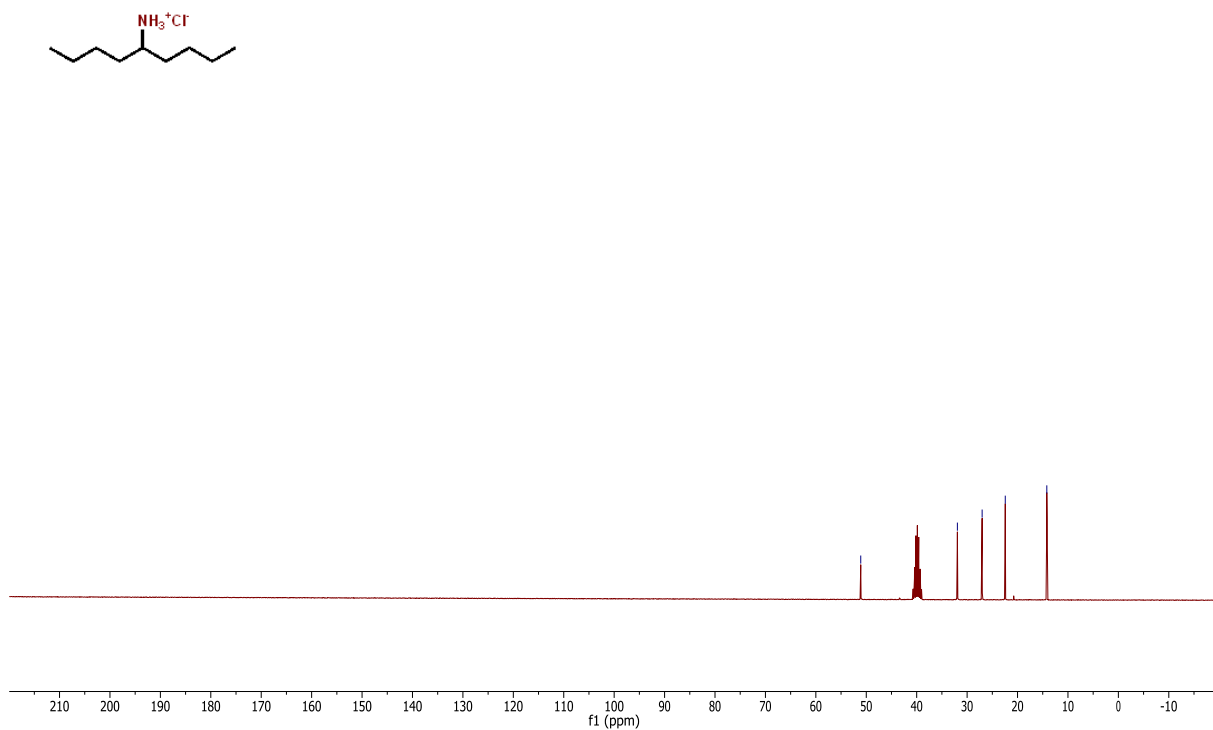

Supplementary Figure 91.  $^{13}\text{C}$  NMR (75 MHz, DMSO- $d_6$ )



190111.f326.10.fid  
Kathir KM22-371  
PROTON DMSO {C:\Bruker\TopSpin3.6.0} 1901 26

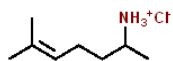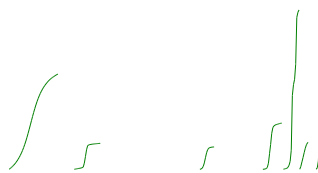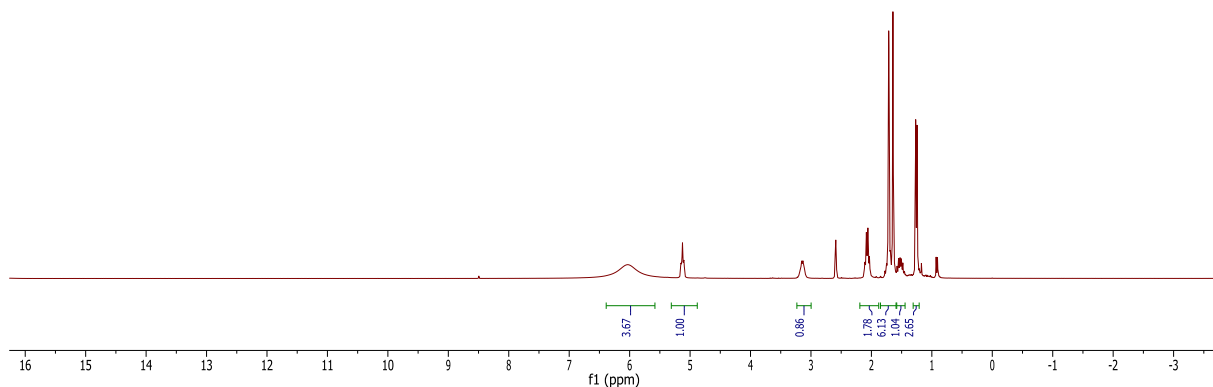

Supplementary Figure 92. <sup>1</sup>H NMR (300 MHz, DMSO-d<sub>6</sub>)

190111.f326.11.fid  
Kathir KM22-371  
C13CPD DMSO {C:\Bruker\TopSpin3.6.0} 1901 26

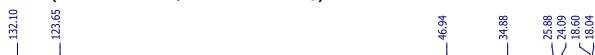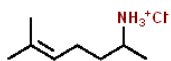

Supplementary Figure 93. <sup>13</sup>C NMR (75 MHz, DMSO-d<sub>6</sub>)

190111.f336.10.fid  
Kathir KM22-416  
PROTON DMSO {C:\Bruker\TopSpin3.6.0} 1901 36

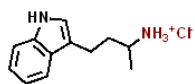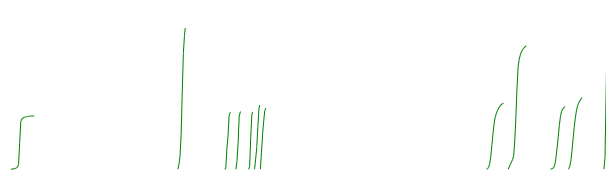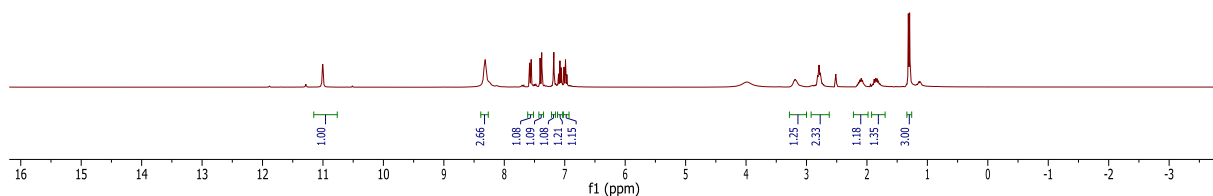

Supplementary Figure 94. <sup>1</sup>H NMR (300 MHz, DMSO-d<sub>6</sub>)

190111.f336.11.fid  
Kathir KM22-416  
C13CPD DMSO {C:\Bruker\TopSpin3.6.0} 1901 36

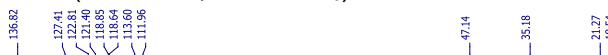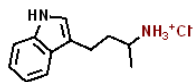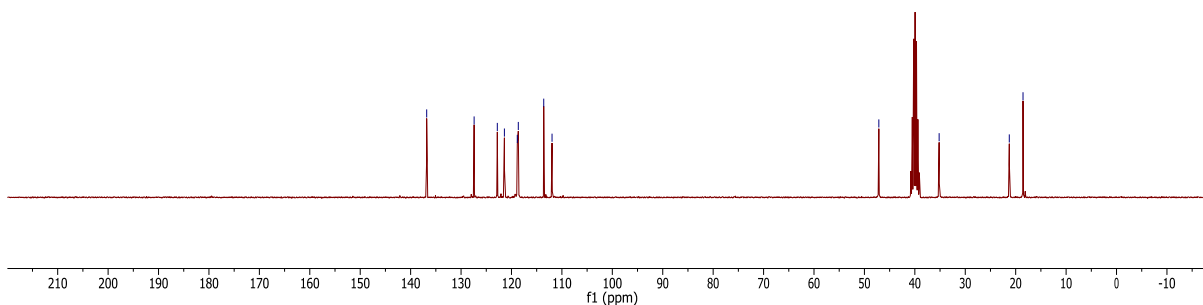

Supplementary Figure 95. <sup>13</sup>C NMR (75 MHz, DMSO-d<sub>6</sub>)

190111.f337.10.fid  
Kathir KM22-346  
PROTON DMSO {C:\Bruker\TopSpin3.6.0} 1901 37

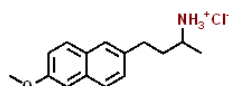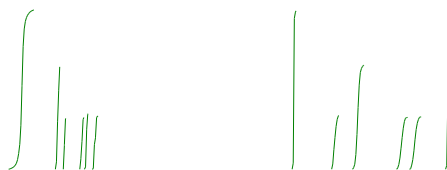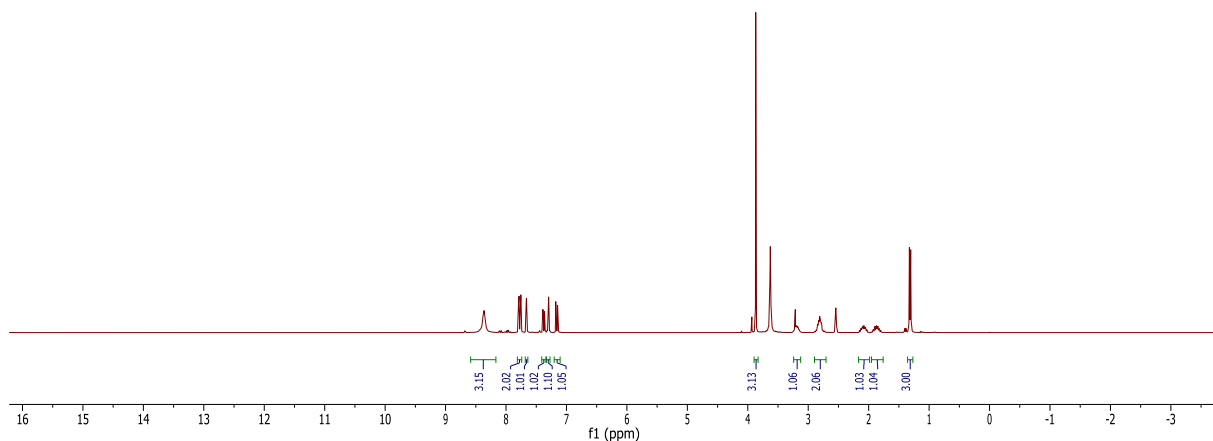

Supplementary Figure 96. <sup>1</sup>H NMR (300 MHz, DMSO-d<sub>6</sub>)

190111.f337.11.fid  
Kathir KM22-346  
C13CPD DMSO {C:\Bruker\TopSpin3.6.0} 1901 37

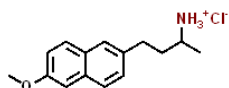

136.55  
133.26  
129.25  
129.03  
128.02  
127.31  
126.41  
119.00  
106.25  
55.60  
46.96  
36.21  
31.28  
18.51

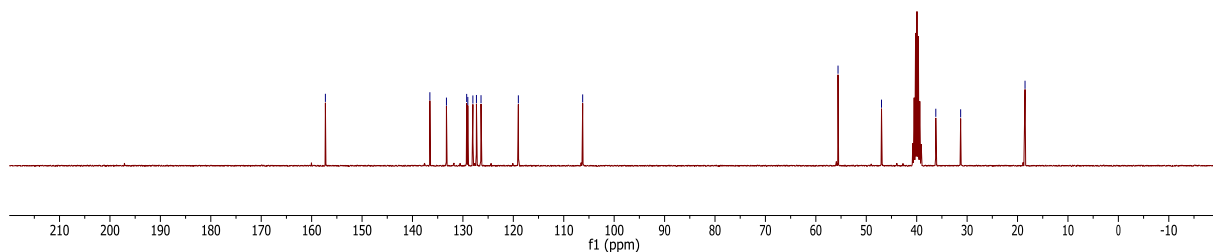

Supplementary Figure 97. <sup>13</sup>C NMR (75 MHz, DMSO-d<sub>6</sub>)

190111.f339.10.fid  
Kathir KM22-347  
PROTON MeOD {C:\Bruker\TopSpin3.6.0} 1901 39

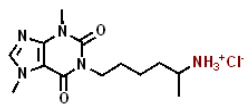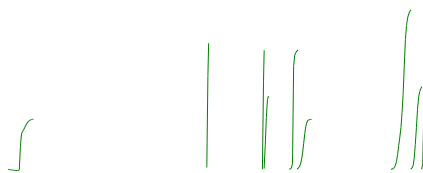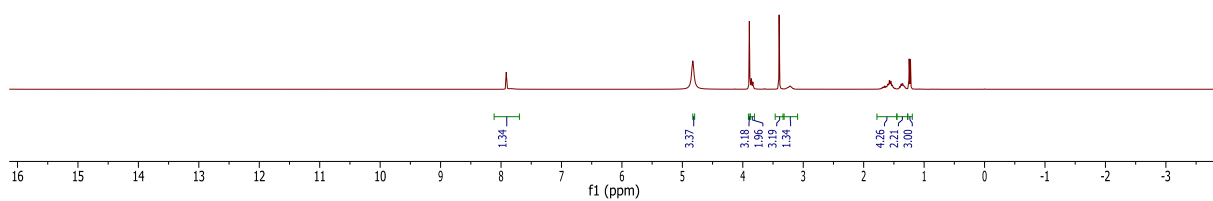

**Supplementary Figure 98. <sup>1</sup>H NMR (300 MHz, Methanol-d<sub>4</sub>)**

190111.f339.11.fid  
Kathir KM22-347  
C13CPD MeOD {C:\Bruker\TopSpin3.6.0} 1901 39

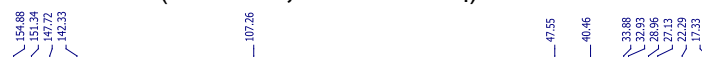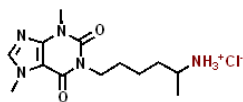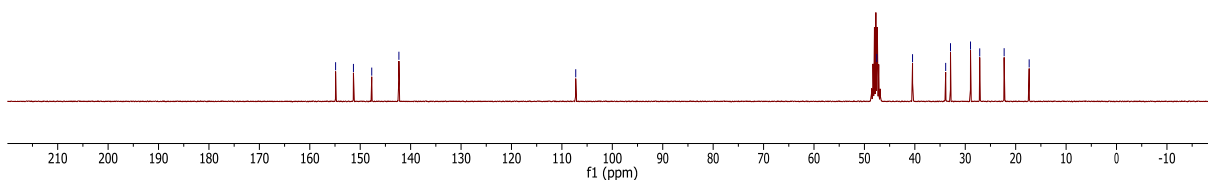

**Supplementary Figure 99. <sup>13</sup>C NMR (75 MHz, Methanol-d<sub>4</sub>)**

190111.f340.10.fid  
Kathir KM22-348  
PROTON CDCl3 {C:\Bruker\TopSpin3.6.0} 1901 40

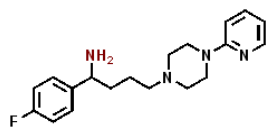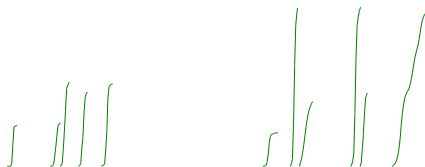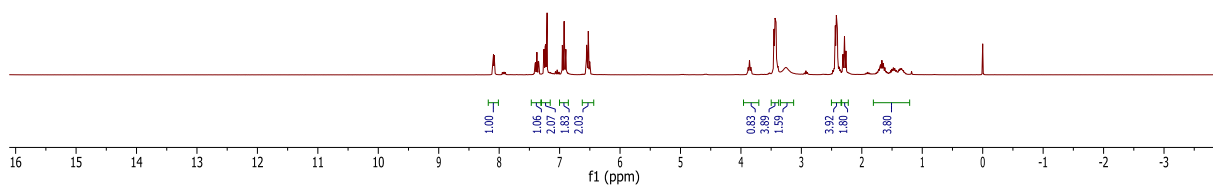

**Supplementary Figure 100. <sup>1</sup>H NMR (300 MHz, Chloroform-d)**

190111.f340.11.fid  
Kathir KM22-348  
C13CPD CDCl3 {C:\Bruker\TopSpin3.6.0} 1901 40

163.54  
160.29  
159.47  
147.90  
140.73  
137.43  
128.10  
128.00  
115.46  
115.18  
113.30  
107.07  
58.35  
55.45  
52.97  
45.10  
36.98  
23.70

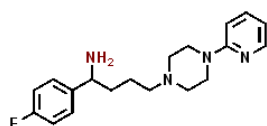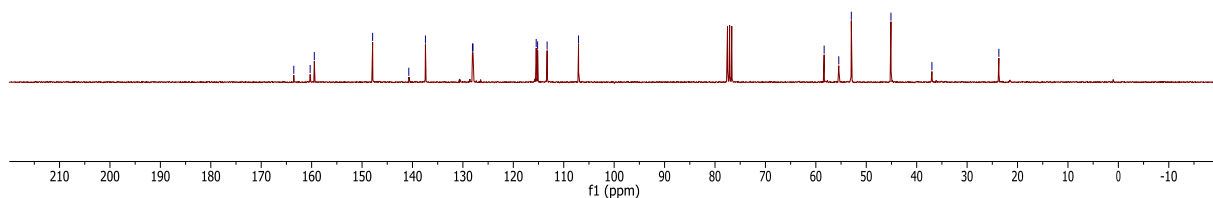

**Supplementary Figure 101.  $^{13}\text{C}$  NMR (75 MHz, Chloroform-*d*)**

190531.f320.11.fid  
Kathir KM22-348  
19F(H-entk) CDCl3 {C:\Bruker\TopSpin3.6.0} 1905 20

-114.96

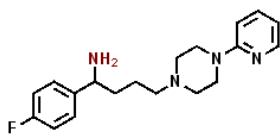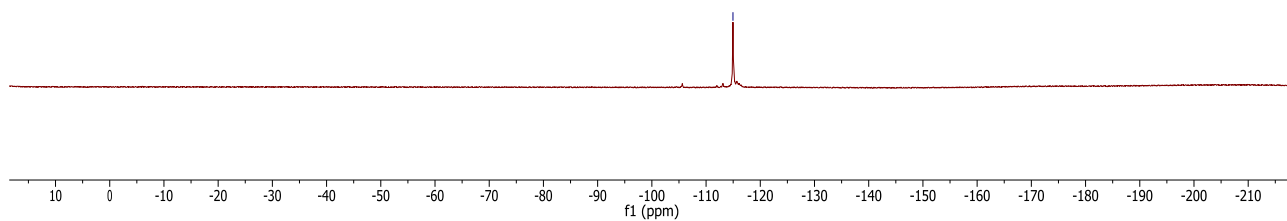

**Supplementary Figure 102.  $^{19}\text{F}$  NMR (282 MHz, Chloroform-*d*)**

190114.408.10.fid  
Kathir KM22-350  
Au1H DMSO {C:\Bruker\TopSpin3.5pl6} 1901 8

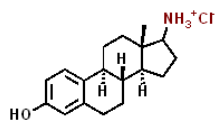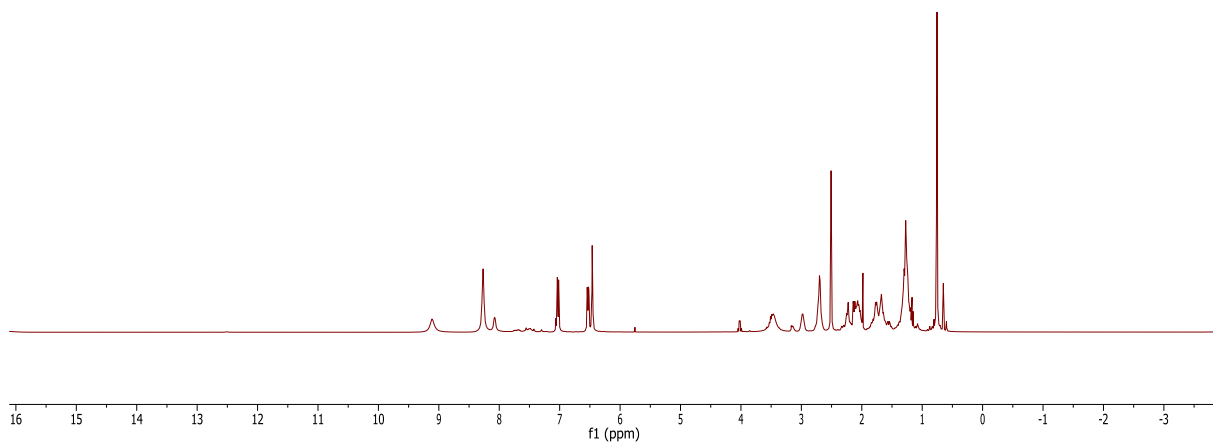

**Supplementary Figure 103.**  $^1\text{H}$  NMR (400 MHz,  $\text{DMSO-}d_6$ )

190114.408.11.fid  
Kathir KM22-350  
Au13C DMSO {C:\Bruker\TopSpin3.5pl6} 1901 8

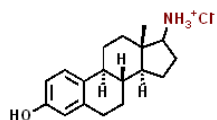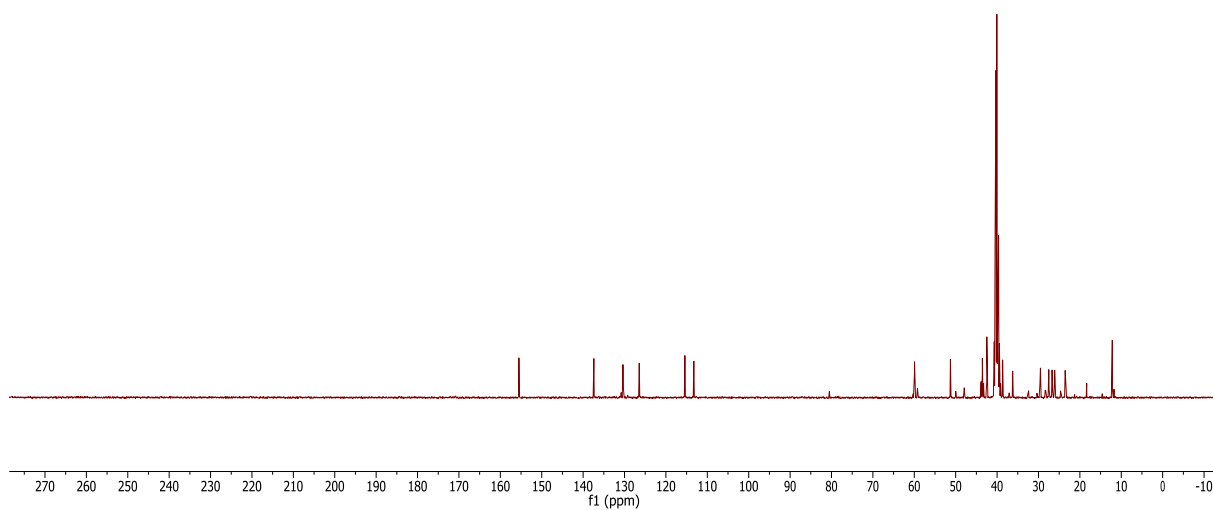

**Supplementary Figure 104.**  $^{13}\text{C}$  NMR (101 MHz,  $\text{DMSO-}d_6$ )

ESI-TOF Accurate Mass Report

Results file: E:\Projects\1901.PRO\SampleDB\1901.rpt  
Last modified: Monday, January 21, 2019 14:51:00

Sample Summary:

| Sample | File     | Sample Name | User   | Target   | Formula  | Expected Mass | Observed Mass | Error PPM | Error mDa |
|--------|----------|-------------|--------|----------|----------|---------------|---------------|-----------|-----------|
| 187    | 19012120 | KM22-350    | Kathir | 271.1936 | C18H25NO | 272.2014      | 272.2013      | -0.4      | -0.1      |

ESI-TOF Accurate Mass Report

File:19012120

Vial:1.D.2

Description:MeOH/0.1%HCOOH in H2O 9:1

Sample Name:KM22-350

Date:21-Jan-2019

UserName:Kathir

Time:14:47:51

Sample Report:

(Time: 0.33) Combine (27:33-80:84)

1: TOF MS ES+  
3.8e+007

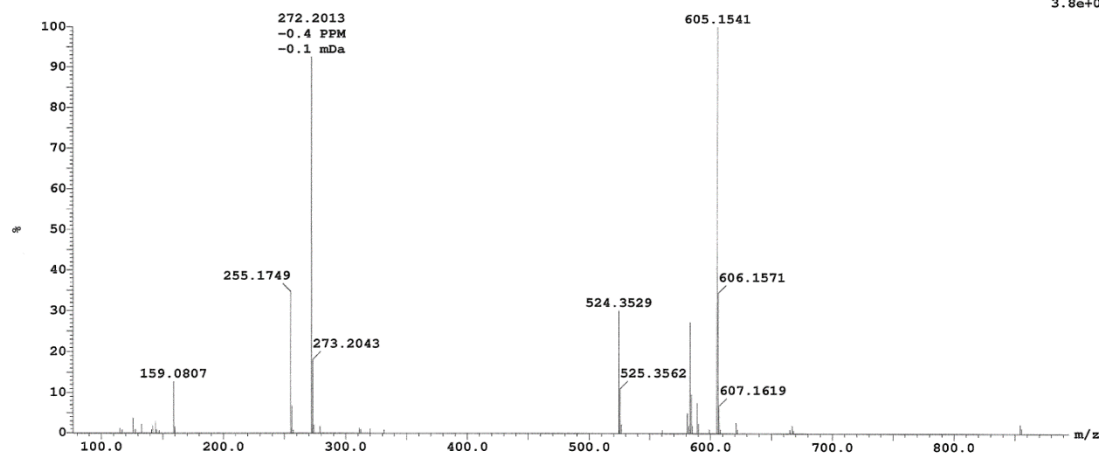

Supplementary Figure 105. HRMS



190114.409.10.fid  
Kathir KM22-351  
Au1H DMSO {C:\Bruker\TopSpin3.5pl6} 1901 9

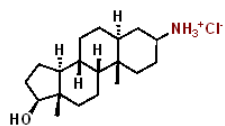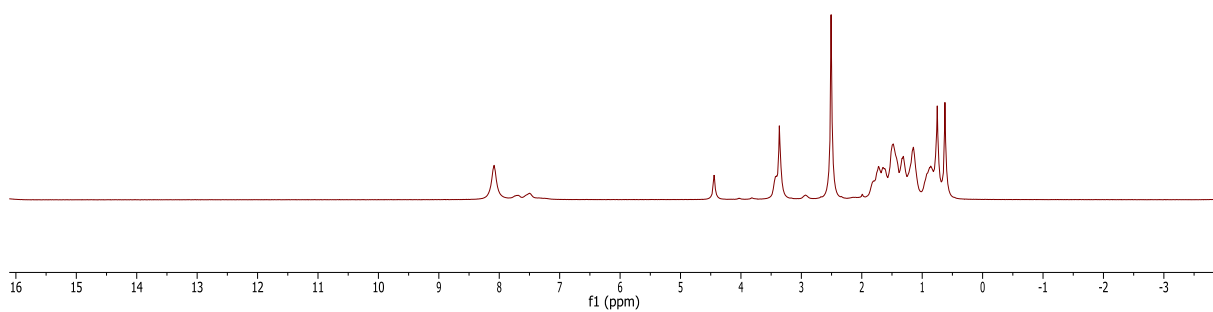

**Supplementary Figure 106.** <sup>1</sup>H NMR (400 MHz, DMSO-d<sub>6</sub>)

190114.409.11.fid  
Kathir KM22-351  
Au13C DMSO {C:\Bruker\TopSpin3.5pl6} 1901 9

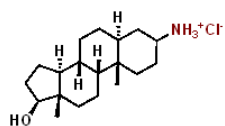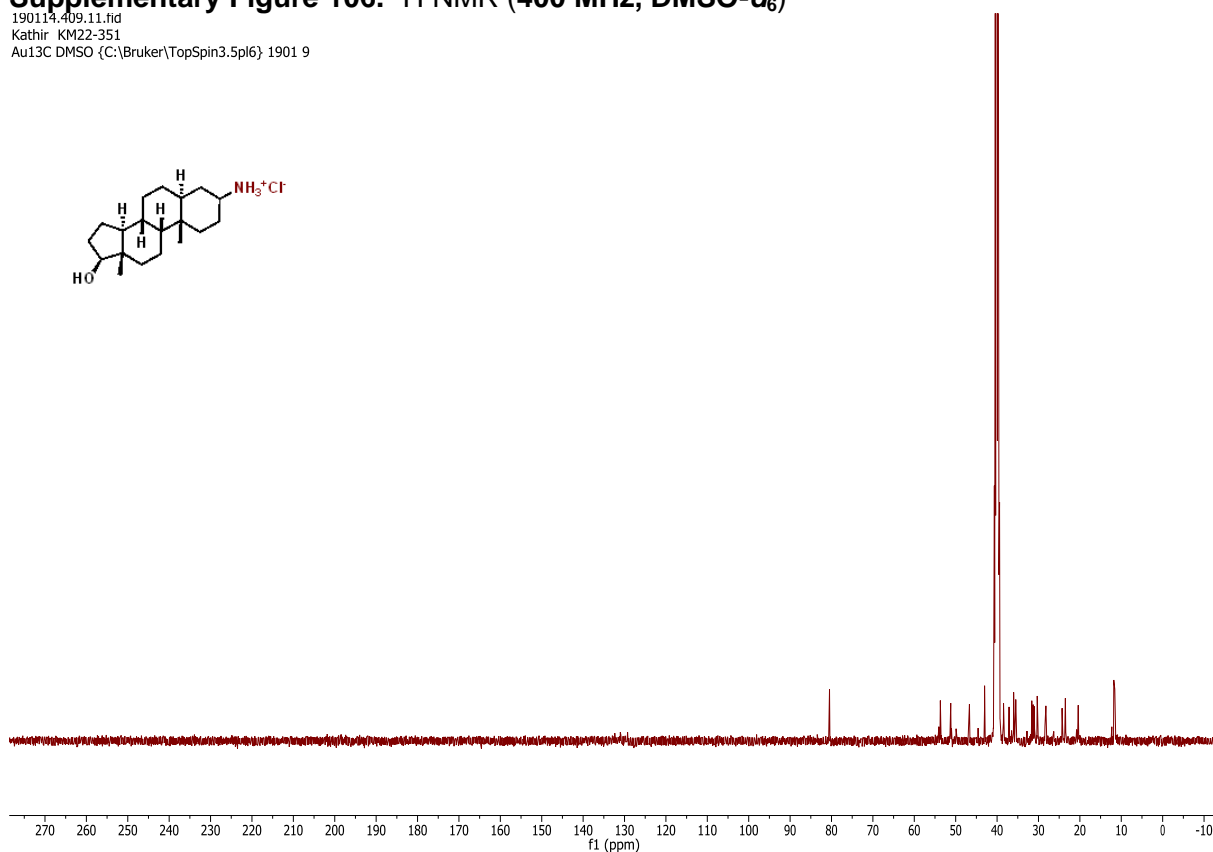

**Supplementary Figure 107.** <sup>13</sup>C NMR (101 MHz, DMSO-d<sub>6</sub>)

ESI-TOF Accurate Mass Report

Page 1

Results file: E:\Projects\1901\_PRO\SampleDB\1901.rpt  
Last modified: Monday, January 21, 2019 14:40:22

Sample Summary:

| Sample | File     | Sample Name | User   | Target   | Formula  | Expected Mass | Observed Mass | Error PPM | Error mDa |
|--------|----------|-------------|--------|----------|----------|---------------|---------------|-----------|-----------|
| 188    | 19012117 | KM22-351    | Kathir | 291.2562 | C19H33NO | 292.2640      | 292.2646      | 2.1       | 0.6       |

ESI-TOF Accurate Mass Report

Page 2

File:19012117

Vial:1.D.3

Description:MeOH/0.1%HCOOH in H2O 9:1

Sample Name:KM22-351

Date:21-Jan-2019

UserName:Kathir

Time:14:37:48

Sample Report:

(Time: 0.34) Combine (28:33-81:85)

1: TOF MS ES+  
3.1e+008

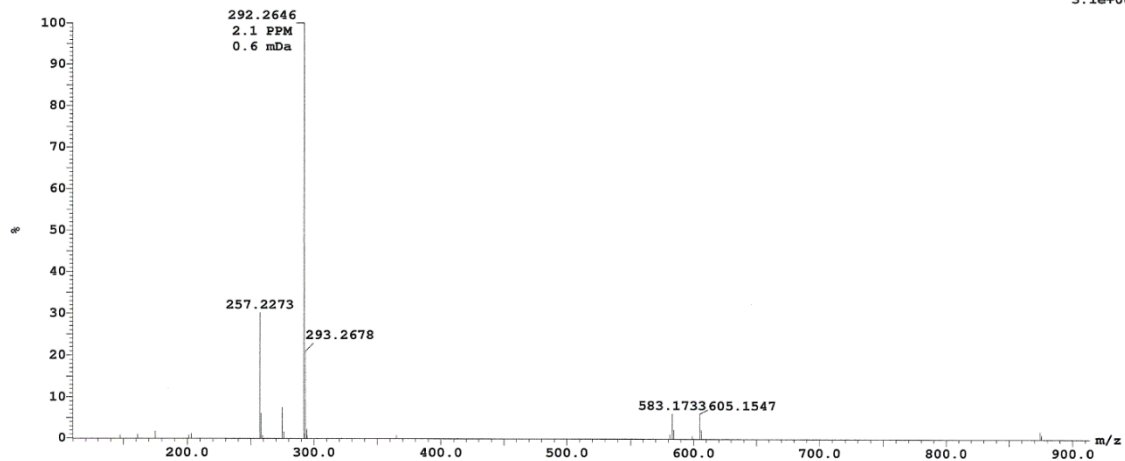

Supplementary Figure 108. HRMS

190114.411.10.fid  
Kathir KM22-353  
Au1H DMSO {C:\Bruker\TopSpin3.5pl6} 1901 11

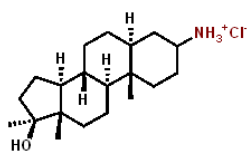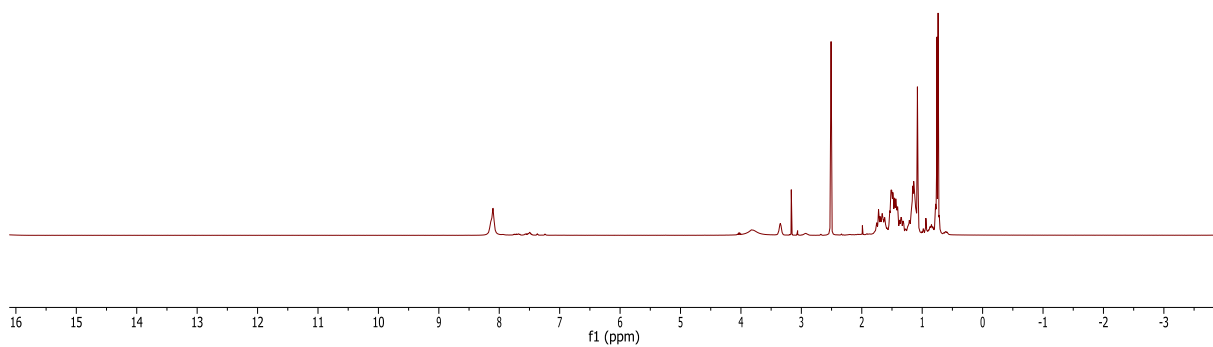

**Supplementary Figure 109.**  $^1\text{H}$  NMR (400 MHz,  $\text{DMSO-}d_6$ )

190114.411.11.fid  
Kathir KM22-353  
Au13C DMSO {C:\Bruker\TopSpin3.5pl6} 1901 11

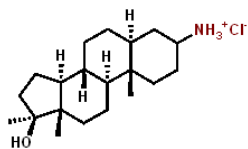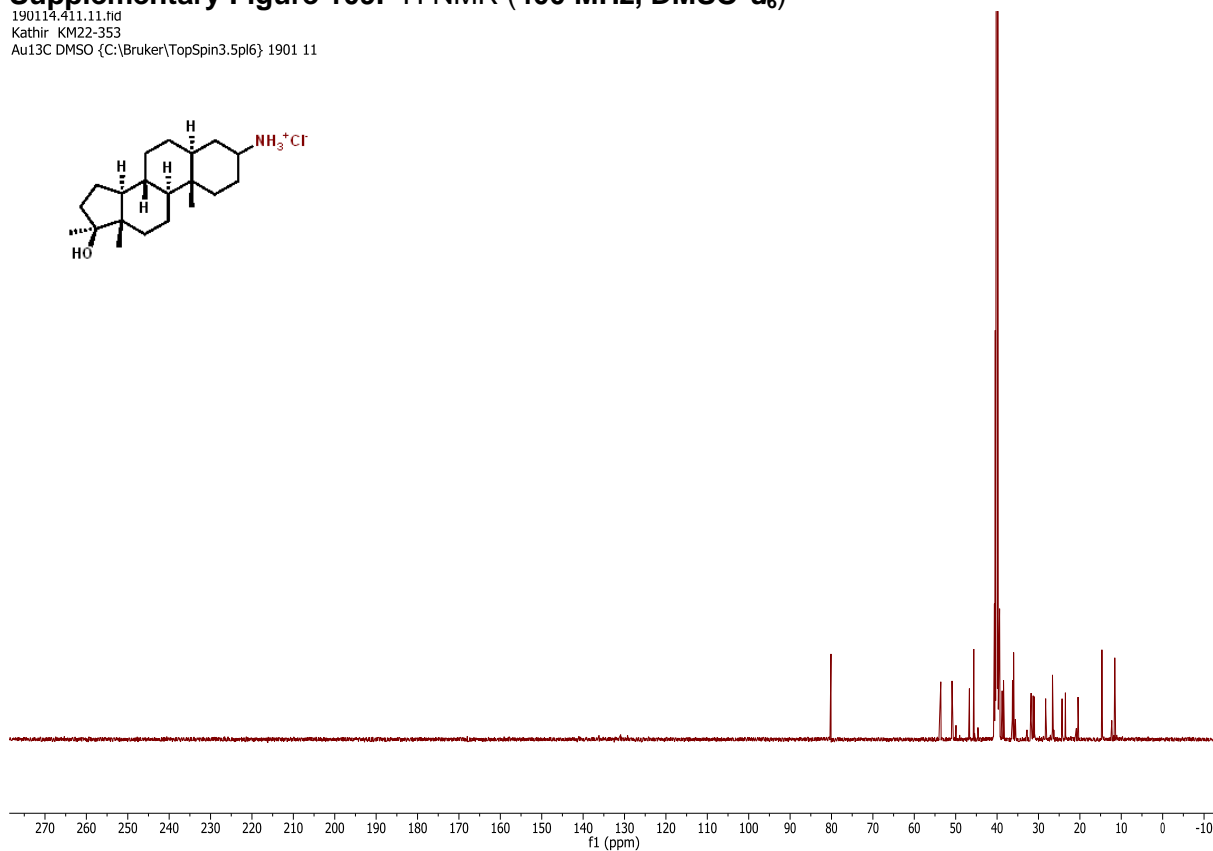

**Supplementary Figure 110.**  $^{13}\text{C}$  NMR (101 MHz,  $\text{DMSO-}d_6$ )

ESI-TOF Accurate Mass Report

Page 1

Results file: E:\Projects\1901.PRO\SampleDB\1901.rpt  
Last modified: Monday, January 21, 2019 14:45:30

Sample Summary:

| Sample | File     | Sample Name | User   | Target   | Formula  | Expected Mass | Observed Mass | Error PPM | Error mDa |
|--------|----------|-------------|--------|----------|----------|---------------|---------------|-----------|-----------|
| 190    | 19012119 | KM22-353    | Kathir | 305.2719 | C20H35NO | 306.2797      | 306.2792      | -1.6      | -0.5      |

ESI-TOF Accurate Mass Report

Page 2

File:19012119

Vial:1:D.5

Description:MeOH/0.1%HCOOH in H2O 9:1

Sample Name:KM22-353

Date:21-Jan-2019

UserName:Kathir

Time:14:42:58

Sample Report:

(Time: 0.35) Combine (29:34-82:86)

1: TOF MS ES+  
1.1e+008

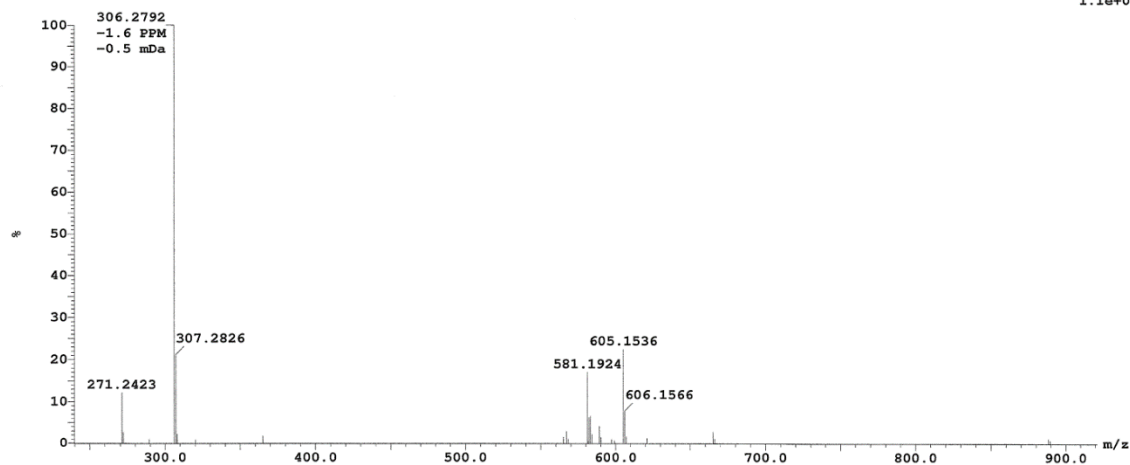

Supplementary Figure 111. HRMS

190108.f301.10.fid  
Kathir KM22-352  
PROTON DMSO {C:\Bruker\TopSpin3.6.0} 1901 1

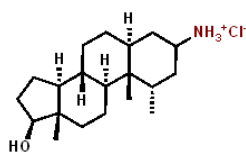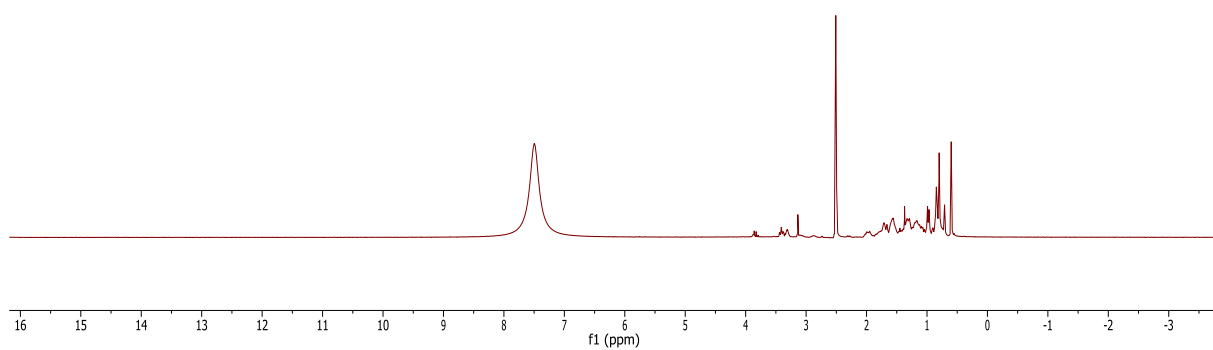

**Supplementary Figure 112.** <sup>1</sup>H NMR (300 MHz, DMSO-d<sub>6</sub>)

190108.f301.11.fid  
Kathir KM22-352  
C13CPD DMSO {C:\Bruker\TopSpin3.6.0} 1901 1

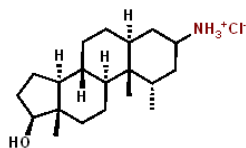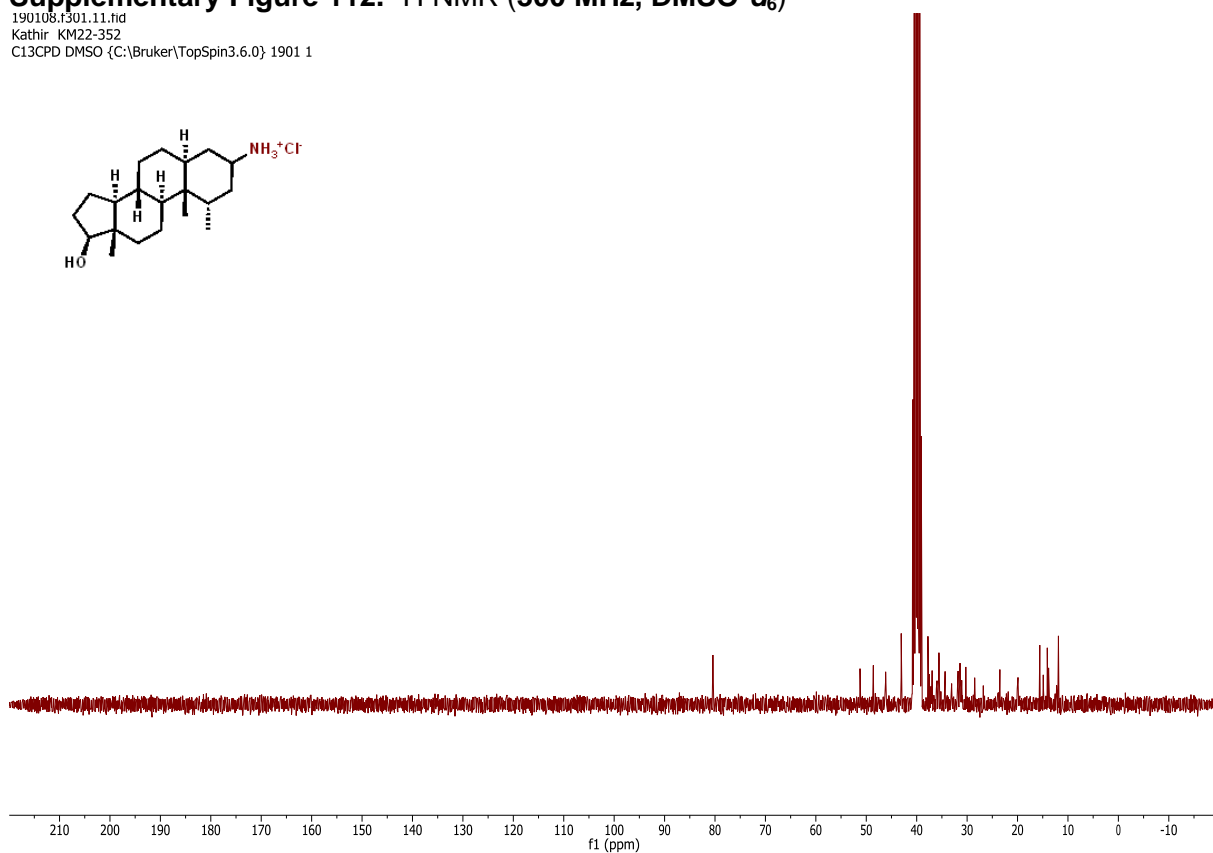

**Supplementary Figure 113.** <sup>13</sup>C NMR (75 MHz, DMSO-d<sub>6</sub>)

ESI-TOF Accurate Mass Report

Results file: E:\Projects\1901.PRO\SampleDB\1901.rpt  
Last modified: Monday, January 21, 2019 14:42:56

Sample Summary:

| Sample | File     | Sample Name | User   | Target   | Formula  | Expected Mass | Observed Mass | Error PPM | Error mDa |
|--------|----------|-------------|--------|----------|----------|---------------|---------------|-----------|-----------|
| 189    | 19012118 | KM22-352    | Kathir | 305.2719 | C20H35NO | 306.2797      | 306.2800      | 1.0       | 0.3       |

ESI-TOF Accurate Mass Report

File:19012118

Sample Name:KM22-352

UserName:Kathir

Vial:1:D,4

Date:21-Jan-2019

Time:14:40:24

Description:MeOH/0.1%HCOOH in H2O 9:1

Sample Report:

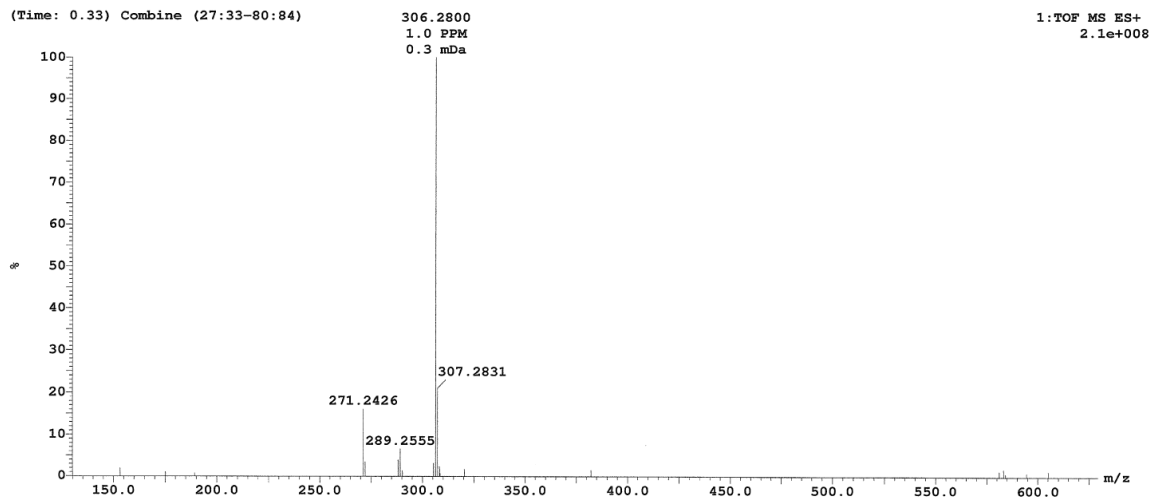

Supplementary Figure 114. HRMS
