# Supplementary material for: Homogeneous cobalt-catalyzed reductive amination for synthesis of functionalized primary amines
Source: PubMed Central journal article supplement (PMC6884468; doi:10.1038/s41467-019-13351-7), 2019-11-29
Supplement: 41467_2019_13351_MOESM3_ESM.pdf [file 41467_2019_13351_MOESM3_ESM.pdf]

### **Description of Additional Supplementary Files**

File Name: Supplementary Data 1

Description: The Cartesian Coordinates (xyz) for all Optimized structures at B3PW91/TZVP level in gas phase
