# Supplementary material for: Homogeneous cobalt-catalyzed reductive amination for synthesis of functionalized primary amines
Source: PubMed Central journal article supplement (PMC6884468; doi:10.1038/s41467-019-13351-7), 2019-11-29
Supplement: 41467_2019_13351_MOESM4_ESM.pdf [file 41467_2019_13351_MOESM4_ESM.pdf]

|                      |             |             |             |                                                                                                         |             |             |             |
|----------------------|-------------|-------------|-------------|---------------------------------------------------------------------------------------------------------|-------------|-------------|-------------|
| <b>H<sub>2</sub></b> |             |             |             | <b>PhCH<sub>2</sub>NH<sub>2</sub></b>                                                                   |             |             |             |
| H                    | 0.00000000  | 0.00000000  | 0.37259400  | C                                                                                                       | 1.40262200  | 1.33054000  | 0.05477200  |
| H                    | 0.00000000  | 0.00000000  | -0.37259400 | C                                                                                                       | 0.04457500  | 1.06595800  | 0.17152600  |
| <b>PhCHNH</b>        |             |             |             | C                                                                                                       | -0.42755300 | -0.24552500 | 0.13636900  |
| C                    | 0.60881300  | -2.15990600 | 0.00000000  | C                                                                                                       | 0.48952300  | -1.28283500 | -0.01856800 |
| C                    | 1.63284300  | -1.22193000 | 0.00000000  | C                                                                                                       | 1.84986600  | -1.02096000 | -0.13005100 |
| C                    | 1.32784700  | 0.13275000  | 0.00000000  | C                                                                                                       | 2.31104700  | 0.28845200  | -0.09277800 |
| C                    | 0.00000000  | 0.56067300  | 0.00000000  | H                                                                                                       | 1.75524800  | 2.35610600  | 0.08191500  |
| C                    | -1.02456500 | -0.38999700 | 0.00000000  | H                                                                                                       | -0.67042400 | 1.87371900  | 0.27722900  |
| C                    | -0.71970200 | -1.74038600 | 0.00000000  | H                                                                                                       | 0.13426400  | -2.30846100 | -0.05845300 |
| H                    | 0.84298700  | -3.21878300 | 0.00000000  | H                                                                                                       | 2.54892600  | -1.84124300 | -0.25242300 |
| H                    | 2.66767800  | -1.54536400 | 0.00000000  | H                                                                                                       | 3.37139800  | 0.49647700  | -0.18440900 |
| H                    | 2.12636500  | 0.86873400  | 0.00000000  | C                                                                                                       | -1.89869000 | -0.54405000 | 0.30514400  |
| H                    | -2.05154700 | -0.04408400 | 0.00000000  | H                                                                                                       | -2.08609600 | -1.57134400 | -0.04310700 |
| H                    | -1.51818800 | -2.47415200 | 0.00000000  | H                                                                                                       | -2.13583100 | -0.53605300 | 1.37552900  |
| C                    | -0.29502900 | 2.00066800  | 0.00000000  | N                                                                                                       | -2.73979900 | 0.46299800  | -0.33099700 |
| H                    | 0.59285700  | 2.64826900  | 0.00000000  | H                                                                                                       | -2.65306800 | 0.42038500  | -1.33959400 |
| N                    | -1.48034500 | 2.45694800  | 0.00000000  | H                                                                                                       | -3.71416400 | 0.31995300  | -0.09818200 |
| H                    | -1.47898300 | 3.47551000  | 0.00000000  | 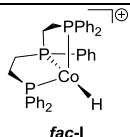 <p><i>fac-1</i></p> |             |             |             |
| C                    | 2.05060000  | 0.11528800  | -1.98390200 |  <p><i>mer-1</i></p> |             |             |             |
| H                    | 1.40529800  | 0.81868300  | -2.51685400 | C                                                                                                       | -0.74434100 | -1.53546800 | 2.67921500  |
| H                    | 3.05272300  | 0.23887600  | -2.40211100 | H                                                                                                       | -0.41042300 | -1.95780400 | 3.62865800  |
| C                    | 1.54993300  | -1.31817500 | -2.13045000 | H                                                                                                       | -1.77112400 | -1.19196300 | 2.83396800  |
| H                    | 2.30641600  | -2.02614100 | -1.78435800 | C                                                                                                       | -0.70156900 | -2.57299900 | 1.55107000  |
| H                    | 1.32927600  | -1.56435800 | -3.17202000 | H                                                                                                       | -1.38827700 | -3.39966400 | 1.74415800  |
| C                    | -1.46512800 | -1.35964900 | -2.09634600 | H                                                                                                       | 0.30358500  | -2.98580600 | 1.42903400  |
| H                    | -1.26603100 | -1.57954900 | -3.14768300 | C                                                                                                       | -0.70156900 | -2.57299900 | -1.55107000 |
| H                    | -2.20279500 | -2.08474700 | -1.74374000 | H                                                                                                       | 0.30358500  | -2.98580600 | -1.42903400 |
| C                    | -2.00981200 | 0.05779000  | -1.92883500 | H                                                                                                       | -1.38827700 | -3.39966400 | -1.74415800 |
| H                    | -3.01731300 | 0.13009800  | -2.34499500 | C                                                                                                       | -0.74434100 | -1.53546800 | -2.67921500 |
| H                    | -1.37913900 | 0.78624600  | -2.44549500 | H                                                                                                       | -1.77112400 | -1.19196300 | -2.83396800 |
| C                    | 2.39465900  | 2.45654700  | -0.28780800 | H                                                                                                       | -0.41042300 | -1.95780400 | -3.62865800 |
|                      |             |             |             | C                                                                                                       | 1.97359100  | -0.36771100 | 2.62323800  |

|   |             |             |             |    |             |             |             |
|---|-------------|-------------|-------------|----|-------------|-------------|-------------|
| C | 3.68604600  | 2.87697000  | -0.61275200 | C  | 2.37490200  | -1.51741300 | 3.30342300  |
| H | 4.47822400  | 2.15179700  | -0.76413400 | H  | 1.65431000  | -2.26635300 | 3.60886200  |
| C | 3.96754000  | 4.23098800  | -0.72086800 | C  | 3.71571500  | -1.71842500 | 3.60882200  |
| H | 4.97250600  | 4.55382800  | -0.96735900 | H  | 4.01680100  | -2.61496000 | 4.13857200  |
| C | 2.96566400  | 5.17094500  | -0.50492700 | C  | 4.66361000  | -0.77269400 | 3.24343100  |
| H | 3.18968700  | 6.22840400  | -0.58645500 | H  | 5.70798400  | -0.92876900 | 3.48784600  |
| C | 1.68232000  | 4.75580700  | -0.17566200 | C  | 4.27030400  | 0.37461300  | 2.56401800  |
| H | 0.90209800  | 5.48656100  | 0.00310000  | H  | 5.00721800  | 1.11581900  | 2.27684600  |
| C | 1.39551400  | 3.40099400  | -0.06258500 | C  | 2.93545600  | 0.57331900  | 2.24569200  |
| H | 0.39941900  | 3.07622800  | 0.21507200  | H  | 2.63303700  | 1.46359700  | 1.70570600  |
| C | 3.40568000  | -0.11912300 | 0.64694500  | C  | -2.95886700 | -1.52704500 | 0.00000000  |
| C | 4.43414800  | -0.78372300 | -0.02075500 | C  | -3.75746200 | -2.67391200 | 0.00000000  |
| H | 4.43741200  | -0.85940000 | -1.10199500 | H  | -3.30612800 | -3.66103700 | 0.00000000  |
| C | 5.47946900  | -1.35460900 | 0.69553500  | C  | -5.13981700 | -2.56146800 | 0.00000000  |
| H | 6.27527300  | -1.86710100 | 0.16721000  | H  | -5.75358300 | -3.45486000 | 0.00000000  |
| C | 5.50741800  | -1.26478800 | 2.08069300  | C  | -5.73679900 | -1.30503200 | 0.00000000  |
| H | 6.32551000  | -1.70802700 | 2.63655600  | H  | -6.81731400 | -1.21996400 | 0.00000000  |
| C | 4.48582100  | -0.60373100 | 2.75302200  | C  | -4.95053300 | -0.16113700 | 0.00000000  |
| H | 4.50568900  | -0.52843900 | 3.83416300  | H  | -5.41410400 | 0.81848300  | 0.00000000  |
| C | 3.43721300  | -0.03837400 | 2.04270400  | C  | -3.56544200 | -0.27112400 | 0.00000000  |
| H | 2.64542600  | 0.48070000  | 2.57340200  | H  | -2.95633600 | 0.62679400  | 0.00000000  |
| C | 0.10703800  | -3.44548700 | -0.76242000 | C  | 1.97359100  | -0.36771100 | -2.62323800 |
| C | -0.32826600 | -4.36770400 | -1.71653400 | C  | 2.37490200  | -1.51741300 | -3.30342300 |
| H | -0.73783800 | -4.03398500 | -2.66352800 | H  | 1.65431000  | -2.26635300 | -3.60886200 |
| C | -0.23941900 | -5.72922500 | -1.46137100 | C  | 3.71571500  | -1.71842500 | -3.60882200 |
| H | -0.58012200 | -6.43915200 | -2.20626600 | H  | 4.01680100  | -2.61496000 | -4.13857200 |
| C | 0.28510300  | -6.18141600 | -0.25619700 | C  | 4.66361000  | -0.77269400 | -3.24343100 |
| H | 0.35256900  | -7.24530000 | -0.06037300 | H  | 5.70798400  | -0.92876900 | -3.48784600 |
| C | 0.72208400  | -5.27017500 | 0.69628400  | C  | 4.27030400  | 0.37461300  | -2.56401800 |
| H | 1.13044500  | -5.61953700 | 1.63755700  | H  | 5.00721800  | 1.11581900  | -2.27684600 |
| C | 0.63026800  | -3.90721500 | 0.44632700  | C  | 2.93545600  | 0.57331900  | -2.24569200 |
| H | 0.97224500  | -3.20078900 | 1.19604700  | H  | 2.63303700  | 1.46359700  | -1.70570600 |
| C | -3.38525800 | -0.44484200 | 0.60020800  | Co | 0.02187000  | 0.23920600  | 0.00000000  |
| C | -3.09848800 | -1.56267100 | 1.38347400  | P  | 0.22073300  | -0.00143300 | 2.20393900  |
| H | -2.06673100 | -1.83641600 | 1.58327900  | P  | -1.13137600 | -1.64962100 | 0.00000000  |
| C | -4.12667400 | -2.33082600 | 1.91482200  | P  | 0.22073300  | -0.00143300 | -2.20393900 |
| H | -3.89465600 | -3.19692000 | 2.52370900  | H  | 0.79539500  | 1.54015300  | 0.00000000  |
| C | -5.44809900 | -1.98033900 | 1.67297000  | C  | -0.32585000 | 1.28552000  | -3.38327800 |
| H | -6.25178600 | -2.57499900 | 2.09166800  | C  | -0.29232900 | 1.07034500  | -4.76266200 |
| C | -5.74140700 | -0.86101500 | 0.90136300  | C  | -0.78563500 | 2.50288300  | -2.88479800 |
| H | -6.77291700 | -0.58105800 | 0.72086200  | C  | -0.72745600 | 2.06188600  | -5.62915000 |
| C | -4.71636300 | -0.09310300 | 0.36841600  | H  | 0.08592400  | 0.13754700  | -5.16674600 |
| H | -4.95500200 | 0.78917900  | -0.21530100 | C  | -1.21831100 | 3.49436900  | -3.75696900 |
| C | -2.54760900 | 2.26614300  | -0.04530000 | H  | -0.78485300 | 2.67783900  | -1.81440500 |
| C | -3.06524700 | 2.94507400  | -1.14878200 | C  | -1.19228000 | 3.27311900  | -5.12706800 |
| H | -3.14290700 | 2.46056500  | -2.11462500 | H  | -0.69833500 | 1.89260600  | -6.69937800 |
| C | -3.49282100 | 4.26177400  | -1.02153300 | H  | -1.57078600 | 4.44159900  | -3.36520100 |
| H | -3.89129700 | 4.78207800  | -1.88491900 | H  | -1.52802200 | 4.04699800  | -5.80774400 |
| C | -3.41438500 | 4.90495600  | 0.20591400  | C  | -0.32585000 | 1.28552000  | 3.38327800  |
| H | -3.75279900 | 5.93002300  | 0.30396100  | C  | -0.29232900 | 1.07034500  | 4.76266200  |
| C | -2.89988200 | 4.23280700  | 1.30925200  | C  | -0.78563500 | 2.50288300  | 2.88479800  |
| H | -2.83551900 | 4.73182900  | 2.26934500  | C  | -0.72745600 | 2.06188600  | 5.62915000  |
| C | -2.46190800 | 2.92299200  | 1.18450500  | H  | 0.08592400  | 0.13754700  | 5.16674600  |

|                                                                                                        |             |             |             |                                                                                                        |             |             |             |
|--------------------------------------------------------------------------------------------------------|-------------|-------------|-------------|--------------------------------------------------------------------------------------------------------|-------------|-------------|-------------|
| H                                                                                                      | -2.0464000  | 2.40857100  | 2.04419500  | C                                                                                                      | -1.21831100 | 3.49436900  | 3.75696900  |
| Co                                                                                                     | 0.03633700  | -0.07602400 | 0.58112700  | H                                                                                                      | -0.78485300 | 2.67783900  | 1.81440500  |
| P                                                                                                      | 1.98683800  | 0.67354400  | -0.20683500 | C                                                                                                      | -1.19228000 | 3.27311900  | 5.12706800  |
| P                                                                                                      | 0.05589900  | -1.63687400 | -1.04911000 | H                                                                                                      | -0.69833500 | 1.89260600  | 6.69937800  |
| P                                                                                                      | -1.99973100 | 0.52070700  | -0.12179900 | H                                                                                                      | -1.57078600 | 4.44159900  | 3.36520100  |
| H                                                                                                      | 0.01233400  | 1.08694100  | 1.50538400  | H                                                                                                      | -1.52802200 | 4.04699800  | 5.80774400  |
| 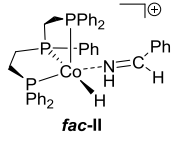 <p><i>fac-II</i></p> |             |             |             |  <p><i>mer-II</i></p> |             |             |             |
| C                                                                                                      | 0.01176400  | 1.58525600  | -2.58014100 | C                                                                                                      | 0.95307100  | -2.68289500 | 1.71443600  |
| H                                                                                                      | -1.03552900 | 1.36032900  | -2.79618400 | H                                                                                                      | 0.49942800  | -3.62096200 | 2.03892900  |
| H                                                                                                      | 0.27524100  | 2.50770100  | -3.10246700 | H                                                                                                      | 2.02885500  | -2.85859300 | 1.63830000  |
| C                                                                                                      | 0.92162000  | 0.43939600  | -3.00974100 | C                                                                                                      | 0.68870300  | -1.55251300 | 2.71879300  |
| H                                                                                                      | 1.96636600  | 0.75779500  | -2.98007300 | H                                                                                                      | 1.21941300  | -1.72776100 | 3.65690600  |
| H                                                                                                      | 0.70823500  | 0.12478200  | -4.03407700 | H                                                                                                      | -0.37710300 | -1.46233700 | 2.94481600  |
| C                                                                                                      | -0.54894500 | -2.08629900 | -2.56779900 | C                                                                                                      | 0.70482500  | 1.57139100  | 2.71310700  |
| H                                                                                                      | -0.43692800 | -2.14169200 | -3.65368200 | H                                                                                                      | -0.36060900 | 1.49218100  | 2.94527500  |
| H                                                                                                      | -0.36407000 | -3.08963300 | -2.17618700 | H                                                                                                      | 1.24145500  | 1.74609700  | 3.64795300  |
| C                                                                                                      | -1.94013900 | -1.59466300 | -2.17942700 | C                                                                                                      | 0.97485000  | 2.69463000  | 1.70224200  |
| H                                                                                                      | -2.69914300 | -2.34342600 | -2.41585100 | H                                                                                                      | 2.05191200  | 2.85912200  | 1.61922200  |
| H                                                                                                      | -2.20426400 | -0.69447100 | -2.73982200 | H                                                                                                      | 0.53285200  | 3.63881800  | 2.02512200  |
| C                                                                                                      | -1.01914100 | 3.12652200  | -0.28859800 | C                                                                                                      | -1.15621100 | -3.16829700 | -0.30210100 |
| C                                                                                                      | -1.80656900 | 3.78364200  | -1.23266600 | C                                                                                                      | -1.97052400 | -3.58036100 | 0.75136600  |
| H                                                                                                      | -1.75955600 | 3.51316800  | -2.28042500 | H                                                                                                      | -1.68838500 | -3.38447800 | 1.77969700  |
| C                                                                                                      | -2.66692700 | 4.80346700  | -0.84081000 | C                                                                                                      | -3.15653100 | -4.26026000 | 0.50001400  |
| H                                                                                                      | -3.27699200 | 5.30498200  | -1.58329500 | H                                                                                                      | -3.77647700 | -4.58391900 | 1.32838700  |
| C                                                                                                      | -2.73953500 | 5.18185700  | 0.49192900  | C                                                                                                      | -3.54141700 | -4.53101100 | -0.80574500 |
| H                                                                                                      | -3.40554500 | 5.98198100  | 0.79403400  | H                                                                                                      | -4.46231900 | -5.06829700 | -1.00081600 |
| C                                                                                                      | -1.95422400 | 4.53273100  | 1.43890700  | C                                                                                                      | -2.73901300 | -4.11405000 | -1.86164800 |
| H                                                                                                      | -2.00606500 | 4.82472000  | 2.48169800  | H                                                                                                      | -3.03156900 | -4.32631400 | -2.88377600 |
| C                                                                                                      | -1.10492800 | 3.50699400  | 1.05282300  | C                                                                                                      | -1.55661900 | -3.43196700 | -1.61331900 |
| H                                                                                                      | -0.50442400 | 2.99717500  | 1.79864900  | H                                                                                                      | -0.93492600 | -3.11692100 | -2.44407000 |
| C                                                                                                      | 1.80528700  | 2.65537500  | -0.60603400 | C                                                                                                      | 3.05510600  | -0.00303000 | 2.02539100  |
| C                                                                                                      | 1.91867000  | 4.03778600  | -0.76936100 | C                                                                                                      | 3.66721200  | -0.00637300 | 3.28192800  |
| H                                                                                                      | 1.03165600  | 4.64405800  | -0.91174400 | H                                                                                                      | 3.06802700  | -0.00442100 | 4.18688700  |
| C                                                                                                      | 3.16583000  | 4.64636500  | -0.74120100 | C                                                                                                      | 5.05016200  | -0.01211800 | 3.38605900  |
| H                                                                                                      | 3.24142800  | 5.72059800  | -0.86618100 | H                                                                                                      | 5.51784500  | -0.01474100 | 4.36396800  |
| C                                                                                                      | 4.31292000  | 3.88448800  | -0.55064000 | C                                                                                                      | 5.83491000  | -0.01446200 | 2.23733100  |
| H                                                                                                      | 5.28527200  | 4.36315900  | -0.52879400 | H                                                                                                      | 6.91562200  | -0.01893100 | 2.32092800  |
| C                                                                                                      | 4.20929100  | 2.51004100  | -0.38518800 | C                                                                                                      | 5.23469000  | -0.01104200 | 0.98599300  |
| H                                                                                                      | 5.09894800  | 1.91022600  | -0.23121400 | H                                                                                                      | 5.84396900  | -0.01283500 | 0.08965100  |
| C                                                                                                      | 2.96119900  | 1.89962600  | -0.40848800 | C                                                                                                      | 3.84902300  | -0.00535600 | 0.87962000  |
| H                                                                                                      | 2.89092100  | 0.82635700  | -0.26664100 | H                                                                                                      | 3.38245100  | -0.00279100 | -0.09925200 |
| C                                                                                                      | 2.31914300  | -1.97248600 | -2.18717700 | C                                                                                                      | -1.15155800 | 3.17432800  | -0.29760800 |
| C                                                                                                      | 2.65237700  | -2.37032000 | -3.48491200 | C                                                                                                      | -1.95144500 | 3.59926700  | 0.76173700  |
| H                                                                                                      | 2.01010200  | -2.11880100 | -4.32211800 | H                                                                                                      | -1.65351600 | 3.41956200  | 1.78857800  |
| C                                                                                                      | 3.81342000  | -3.09249800 | -3.71961300 | C                                                                                                      | -3.14274700 | 4.27287700  | 0.51816100  |
| H                                                                                                      | 4.06402100  | -3.39642400 | -4.72953600 | H                                                                                                      | -3.75146000 | 4.60673600  | 1.35081400  |
| C                                                                                                      | 4.65391300  | -3.42475200 | -2.66271200 | C                                                                                                      | -3.54682100 | 4.52501500  | -0.78544700 |
| H                                                                                                      | 5.56058700  | -3.98892600 | -2.84861100 | H                                                                                                      | -4.47189100 | 5.05717500  | -0.97471600 |

|                                                                                                                 |             |             |             |    |             |             |             |
|-----------------------------------------------------------------------------------------------------------------|-------------|-------------|-------------|----|-------------|-------------|-------------|
| C                                                                                                               | 4.33088700  | -3.03253600 | -1.37107100 | C  | -2.75810300 | 4.09619300  | -1.84693500 |
| H                                                                                                               | 4.98475500  | -3.28888700 | -0.54528200 | H  | -3.06577200 | 4.29391500  | -2.86752900 |
| C                                                                                                               | 3.16822500  | -2.30884300 | -1.13360700 | C  | -1.57094000 | 3.41983700  | -1.60638000 |
| H                                                                                                               | 2.91691700  | -2.00454900 | -0.12426600 | H  | -0.96095300 | 3.09390400  | -2.44159700 |
| C                                                                                                               | -2.35266400 | -2.67527400 | 0.51643300  | Co | 0.27098000  | 0.00445200  | -0.11452200 |
| C                                                                                                               | -2.63541100 | -2.58859600 | 1.88401300  | P  | 0.39958800  | -2.22297900 | -0.03217100 |
| H                                                                                                               | -2.65527700 | -1.61952500 | 2.37128100  | P  | 1.22820500  | 0.00497500  | 1.86359800  |
| C                                                                                                               | -2.90972600 | -3.72996800 | 2.62242500  | P  | 0.40740600  | 2.23176300  | -0.03881700 |
| H                                                                                                               | -3.14273800 | -3.64360500 | 3.67772600  | H  | -0.16613800 | 0.00350900  | -1.57519300 |
| C                                                                                                               | -2.89192600 | -4.97957800 | 2.01190600  | C  | 1.60776700  | 3.09252600  | -1.12824000 |
| H                                                                                                               | -3.10792300 | -5.87125600 | 2.58895200  | C  | 1.96459900  | 4.42582000  | -0.91268800 |
| C                                                                                                               | -2.60211400 | -5.07824900 | 0.65875800  | C  | 2.16308000  | 2.39994700  | -2.20212800 |
| H                                                                                                               | -2.59100500 | -6.04757900 | 0.17329200  | C  | 2.87492200  | 5.04791800  | -1.75395600 |
| C                                                                                                               | -2.33437500 | -3.93356000 | -0.08560000 | H  | 1.52561100  | 4.98750200  | -0.09522100 |
| H                                                                                                               | -2.12746400 | -4.04083800 | -1.14368100 | C  | 3.07150700  | 3.02762900  | -3.04685300 |
| C                                                                                                               | -3.58802800 | -0.20462900 | -0.21326900 | H  | 1.86627300  | 1.37194900  | -2.38066400 |
| C                                                                                                               | -3.66921800 | 0.87245300  | 0.66637900  | C  | 3.43043500  | 4.34913700  | -2.82103600 |
| H                                                                                                               | -2.78321100 | 1.19514300  | 1.20002700  | H  | 3.14790900  | 6.08272500  | -1.58132200 |
| C                                                                                                               | -4.87693300 | 1.53437100  | 0.85462500  | H  | 3.49605100  | 2.48385600  | -3.88314900 |
| H                                                                                                               | -4.92946500 | 2.37023300  | 1.54245500  | H  | 4.13894000  | 4.83967300  | -3.47867900 |
| C                                                                                                               | -6.00795600 | 1.13002800  | 0.15981200  | C  | 1.60823000  | -3.08763100 | -1.10955600 |
| H                                                                                                               | -6.94957400 | 1.64720100  | 0.30504500  | C  | 1.96468000  | -4.41946600 | -0.88446400 |
| C                                                                                                               | -5.93391800 | 0.05598900  | -0.72079200 | C  | 2.17032900  | -2.40046900 | -2.18340000 |
| H                                                                                                               | -6.81702500 | -0.26690300 | -1.26041100 | C  | 2.88125600  | -5.04542000 | -1.71597500 |
| C                                                                                                               | -4.73284000 | -0.61332200 | -0.90263200 | H  | 1.52047700  | -4.97707600 | -0.06702200 |
| H                                                                                                               | -4.69989000 | -1.46319300 | -1.57489500 | C  | 3.08512500  | -3.03199700 | -3.01837500 |
| Co                                                                                                              | 0.09835500  | -0.22519400 | 0.18246900  | H  | 1.87428600  | -1.37361100 | -2.36965500 |
| P                                                                                                               | 0.16974400  | 1.80286900  | -0.73535900 | C  | 3.44362800  | -4.35193900 | -2.78292200 |
| P                                                                                                               | 0.79284400  | -1.01327900 | -1.83755000 | H  | 3.15386400  | -6.07904000 | -1.53577800 |
| P                                                                                                               | -1.98949100 | -1.09788900 | -0.38173400 | H  | 3.51503200  | -2.49239500 | -3.85463400 |
| H                                                                                                               | -0.46630900 | 0.50895300  | 1.34389600  | H  | 4.15715100  | -4.84537300 | -3.43292400 |
| H                                                                                                               | 0.08050500  | -2.53305100 | 1.17761600  | N  | -1.71964700 | 0.01164700  | 0.58812400  |
| C                                                                                                               | 1.31179800  | -1.91510500 | 2.47433500  | C  | -4.15978600 | -0.01132800 | 0.23235400  |
| N                                                                                                               | 0.60941500  | -1.69970200 | 1.42155100  | C  | -4.58210200 | 0.04525800  | 1.56540500  |
| C                                                                                                               | 2.17923800  | -0.97989300 | 3.17123100  | C  | -5.12372300 | -0.06037300 | -0.77895600 |
| C                                                                                                               | 2.93826400  | -1.47548900 | 4.23986200  | C  | -5.93042800 | 0.05120400  | 1.87428500  |
| C                                                                                                               | 2.27686100  | 0.37560900  | 2.84021400  | H  | -3.85972800 | 0.08524500  | 2.37457600  |
| C                                                                                                               | 3.78202800  | -0.64026900 | 4.95349700  | C  | -6.47575100 | -0.05379500 | -0.46975500 |
| H                                                                                                               | 2.86158700  | -2.52410700 | 4.50958300  | H  | -4.80443700 | -0.10468700 | -1.81483900 |
| C                                                                                                               | 3.11699400  | 1.20937100  | 3.55793700  | C  | -6.88066100 | 0.00171600  | 0.85702300  |
| H                                                                                                               | 1.67032700  | 0.77283800  | 2.03493100  | H  | -6.24823600 | 0.09475900  | 2.90956900  |
| C                                                                                                               | 3.87256900  | 0.70409200  | 4.61228300  | H  | -7.21299400 | -0.09210900 | -1.26302800 |
| H                                                                                                               | 4.36594300  | -1.03445300 | 5.77676900  | H  | -7.93630600 | 0.00678100  | 1.10309300  |
| H                                                                                                               | 3.18578500  | 2.25878900  | 3.29634400  | C  | -2.75282200 | -0.02328300 | -0.16485700 |
| H                                                                                                               | 4.52988000  | 1.36102100  | 5.17049600  | H  | -1.97092100 | 0.05283100  | 1.57491700  |
| H                                                                                                               | 1.27530200  | -2.91204500 | 2.91943400  | H  | -2.55605600 | -0.06840100 | -1.23507800 |
| 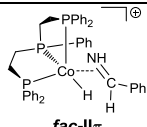 <p>fac-<math>\Pi</math></p> |             |             |             |    |             |             |             |

|   |             |             |             |
|---|-------------|-------------|-------------|
| C | 1.82798000  | -1.97325200 | -2.07158900 |
| H | 1.90984300  | -1.24661100 | -2.88392600 |
| H | 2.64949100  | -2.68228200 | -2.19433700 |
| C | 0.48037800  | -2.68422600 | -2.12145400 |
| H | 0.48709300  | -3.59783700 | -1.52318100 |
| H | 0.22607000  | -2.98210500 | -3.14204400 |
| C | -1.41813600 | -0.51310300 | -2.81018500 |
| H | -1.23195900 | -0.98700000 | -3.77662700 |
| H | -2.49871500 | -0.38913900 | -2.70942600 |
| C | -0.72676700 | 0.84258500  | -2.71732900 |
| H | -1.21750500 | 1.57301000  | -3.36444900 |
| H | 0.32349500  | 0.77472800  | -3.01203800 |
| C | 3.40182300  | 0.18346100  | -0.91881800 |
| C | 4.53328900  | -0.25580400 | -1.61375300 |
| H | 4.62227200  | -1.29095200 | -1.92399800 |
| C | 5.56506600  | 0.62565900  | -1.89782900 |
| H | 6.43777600  | 0.27652600  | -2.43783700 |
| C | 5.48528100  | 1.95082300  | -1.48162700 |
| H | 6.29591900  | 2.63657900  | -1.70006100 |
| C | 4.37024300  | 2.39106600  | -0.78352700 |
| H | 4.30380000  | 3.42151500  | -0.45470800 |
| C | 3.32952300  | 1.51145100  | -0.50503300 |
| H | 2.45761700  | 1.86231100  | 0.03394300  |
| C | 2.86823200  | -2.13113400 | 0.68298500  |
| C | 3.69899700  | -1.60319600 | 1.67563200  |
| H | 3.92216100  | -0.54196900 | 1.68869700  |
| C | 4.27413100  | -2.43290200 | 2.62822600  |
| H | 4.92559200  | -2.00976100 | 3.38441300  |
| C | 4.02463200  | -3.79980100 | 2.60963400  |
| H | 4.47668700  | -4.44630600 | 3.35268100  |
| C | 3.20123800  | -4.33442300 | 1.62827000  |
| H | 3.00895600  | -5.40091800 | 1.60001700  |
| C | 2.62198200  | -3.50600800 | 0.67399600  |
| H | 1.99227500  | -3.95220300 | -0.08655300 |
| C | -2.27852300 | -2.83667300 | -1.26327500 |
| C | -2.87399900 | -3.39479100 | -2.39812200 |
| H | -2.54285400 | -3.11627600 | -3.39270300 |
| C | -3.90295800 | -4.31553800 | -2.26379300 |
| H | -4.36156800 | -4.74331900 | -3.14794900 |
| C | -4.34349300 | -4.68855200 | -0.99865200 |
| H | -5.14730200 | -5.40864600 | -0.89652200 |
| C | -3.75372300 | -4.13844700 | 0.13111200  |
| H | -4.09580000 | -4.42840900 | 1.11816400  |
| C | -2.72422700 | -3.21262300 | 0.00412100  |
| H | -2.25962400 | -2.78019300 | 0.88399800  |
| C | -2.54185700 | 1.81285500  | -0.69069800 |
| C | -3.08557200 | 2.98565200  | -1.22009100 |
| H | -2.45065900 | 3.70011400  | -1.73212400 |
| C | -4.44005400 | 3.25022800  | -1.08066500 |
| H | -4.85447600 | 4.16370800  | -1.49170500 |
| C | -5.26299500 | 2.35024800  | -0.41183600 |
| H | -6.32086800 | 2.56065900  | -0.30386400 |
| C | -4.72736500 | 1.18661900  | 0.12212000  |

|                                                                                                           |             |             |             |
|-----------------------------------------------------------------------------------------------------------|-------------|-------------|-------------|
| H                                                                                                         | -5.36386200 | 0.48545600  | 0.64940500  |
| C                                                                                                         | -3.37017900 | 0.92039300  | -0.01301600 |
| H                                                                                                         | -2.95428700 | 0.01588000  | 0.41730600  |
| C                                                                                                         | 0.06063500  | 3.03102600  | -0.90520800 |
| C                                                                                                         | 0.55176400  | 3.65595900  | -2.05032700 |
| H                                                                                                         | 0.48630000  | 3.17448900  | -3.01846700 |
| C                                                                                                         | 1.13813300  | 4.91402100  | -1.96416700 |
| H                                                                                                         | 1.51714400  | 5.39106500  | -2.86072200 |
| C                                                                                                         | 1.23236400  | 5.55773700  | -0.73850300 |
| H                                                                                                         | 1.68335900  | 6.54137100  | -0.67465300 |
| C                                                                                                         | 0.74336100  | 4.93911100  | 0.40759200  |
| H                                                                                                         | 0.81087300  | 5.43956500  | 1.36680700  |
| C                                                                                                         | 0.16452800  | 3.68151900  | 0.32693000  |
| H                                                                                                         | -0.21484000 | 3.20595400  | 1.22573600  |
| Co                                                                                                        | -0.05515300 | -0.35985000 | 0.24824200  |
| P                                                                                                         | 2.04269900  | -0.97985100 | -0.50074900 |
| P                                                                                                         | -0.89518600 | -1.64360700 | -1.41255000 |
| P                                                                                                         | -0.76544800 | 1.39479700  | -0.94134600 |
| H                                                                                                         | 0.62806000  | 0.70061100  | 1.02734300  |
| H                                                                                                         | 0.29643100  | -2.37261300 | 1.65227600  |
| C                                                                                                         | 0.13862500  | -0.61652900 | 2.44600700  |
| H                                                                                                         | 1.19866600  | -0.62249300 | 2.71009900  |
| C                                                                                                         | -0.68741100 | 0.32974700  | 3.22629100  |
| C                                                                                                         | -0.07926900 | 1.42406600  | 3.84599000  |
| C                                                                                                         | -2.04938400 | 0.10438200  | 3.42710600  |
| C                                                                                                         | -0.82272000 | 2.28972000  | 4.63303500  |
| H                                                                                                         | 0.98503400  | 1.59294000  | 3.71226300  |
| C                                                                                                         | -2.79270400 | 0.97279200  | 4.21262600  |
| H                                                                                                         | -2.50709400 | -0.77077200 | 2.98249500  |
| C                                                                                                         | -2.18405200 | 2.06847800  | 4.81352800  |
| H                                                                                                         | -0.34067800 | 3.13231900  | 5.11555600  |
| H                                                                                                         | -3.84904300 | 0.78733600  | 4.37029700  |
| H                                                                                                         | -2.76571200 | 2.74097600  | 5.43351800  |
| N                                                                                                         | -0.39868800 | -1.64529000 | 1.80939800  |
| 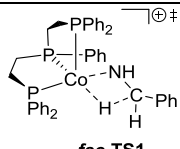 <p><b>fac-TS1</b></p> |             |             |             |
| C                                                                                                         | 1.81040700  | -1.99525700 | -2.06702300 |
| H                                                                                                         | 1.90076300  | -1.27181800 | -2.88130400 |
| H                                                                                                         | 2.62459200  | -2.71320900 | -2.18663600 |
| C                                                                                                         | 0.45590000  | -2.69384800 | -2.11857600 |
| H                                                                                                         | 0.45200100  | -3.60472900 | -1.51619200 |
| H                                                                                                         | 0.20245700  | -2.99374200 | -3.13882900 |
| C                                                                                                         | -1.41664500 | -0.50310000 | -2.81929500 |
| H                                                                                                         | -1.23414200 | -0.97942900 | -3.78525900 |
| H                                                                                                         | -2.49559700 | -0.36316300 | -2.72176000 |
| C                                                                                                         | -0.70547400 | 0.84268000  | -2.72338200 |
| H                                                                                                         | -1.18160200 | 1.57974200  | -3.37381600 |
| H                                                                                                         | 0.34510800  | 0.75827400  | -3.01263000 |
|  <p><b>mer-TS1</b></p> |             |             |             |
| C                                                                                                         | 1.63068500  | -2.16952200 | -1.85005200 |
| H                                                                                                         | 2.61888300  | -2.32648400 | -2.28334700 |
| H                                                                                                         | 1.25597400  | -3.13909800 | -1.51467800 |
| C                                                                                                         | 0.66125500  | -1.56929200 | -2.87350900 |
| H                                                                                                         | 0.42431400  | -2.28481800 | -3.66348800 |
| H                                                                                                         | 1.06023600  | -0.65796900 | -3.32399700 |
| C                                                                                                         | -2.12657600 | -0.18272200 | -2.81132300 |
| H                                                                                                         | -1.65498500 | 0.67299600  | -3.29985400 |
| H                                                                                                         | -2.59448800 | -0.79847200 | -3.58221100 |
| C                                                                                                         | -3.14821000 | 0.24857500  | -1.75331200 |
| H                                                                                                         | -3.72040000 | -0.61939300 | -1.41836900 |
| H                                                                                                         | -3.85949300 | 0.97359500  | -2.15204400 |

|   |             |             |             |   |             |             |             |
|---|-------------|-------------|-------------|---|-------------|-------------|-------------|
| C | 3.40414300  | 0.14964400  | -0.91602100 | C | 3.49018300  | -0.43507200 | -0.47825200 |
| C | 4.53017000  | -0.29400600 | -1.61673700 | C | 3.95833600  | -0.02440600 | -1.72744000 |
| H | 4.60848700  | -1.32697300 | -1.93691100 | H | 3.29984100  | -0.01976100 | -2.58791100 |
| C | 5.57016600  | 0.58009500  | -1.89376900 | C | 5.27308300  | 0.39097200  | -1.88039600 |
| H | 6.43863900  | 0.22781800  | -2.43855200 | H | 5.62966800  | 0.69549300  | -2.85788300 |
| C | 5.50431000  | 1.90171400  | -1.46400300 | C | 6.12752900  | 0.41725200  | -0.78538200 |
| H | 6.32161100  | 2.58137500  | -1.67658600 | H | 7.15656200  | 0.73582300  | -0.90609600 |
| C | 4.39467700  | 2.34630700  | -0.76002700 | C | 5.65808700  | 0.03790500  | 0.46480500  |
| H | 4.33913400  | 3.37406600  | -0.42097100 | H | 6.31786700  | 0.06261900  | 1.32441000  |
| C | 3.34550300  | 1.47434500  | -0.48931600 | C | 4.34522500  | -0.38627000 | 0.62125900  |
| H | 2.47701600  | 1.82884100  | 0.05303700  | H | 3.99826800  | -0.69777500 | 1.59904500  |
| C | 2.84873000  | -2.15651100 | 0.68777900  | C | -1.61217600 | -2.69614700 | -1.47106700 |
| C | 3.68844700  | -1.63489400 | 1.67617900  | C | -2.08041000 | -3.52994500 | -2.49117600 |
| H | 3.92613200  | -0.57678400 | 1.68346900  | H | -1.98028500 | -3.23949900 | -3.53219000 |
| C | 4.25459300  | -2.46746700 | 2.63175300  | C | -2.67773900 | -4.74332300 | -2.18387500 |
| H | 4.91297000  | -2.04917100 | 3.38463900  | H | -3.03790000 | -5.38418800 | -2.98045100 |
| C | 3.98735400  | -3.83101100 | 2.62023400  | C | -2.81306300 | -5.13644200 | -0.85635700 |
| H | 4.43239600  | -4.47981100 | 3.36550700  | H | -3.28005600 | -6.08519900 | -0.61831400 |
| C | 3.15495900  | -4.35944900 | 1.64307100  | C | -2.34949200 | -4.31511500 | 0.16147300  |
| H | 2.94855500  | -5.42344000 | 1.62040800  | H | -2.45154700 | -4.61950400 | 1.19654000  |
| C | 2.58432700  | -3.52809600 | 0.68624000  | C | -1.75034400 | -3.09868000 | -0.14406100 |
| H | 1.94645600  | -3.96953800 | -0.07025800 | H | -1.38578300 | -2.46424100 | 0.65566200  |
| C | -2.30829900 | -2.81562700 | -1.26453100 | C | -2.56796800 | 2.75241200  | -0.34573700 |
| C | -2.92430300 | -3.35823100 | -2.39582200 | C | -2.59409500 | 3.39048200  | -1.58716100 |
| H | -2.60301300 | -3.07547100 | -3.39245800 | H | -2.53074600 | 2.81933700  | -2.50696900 |
| C | -3.96130000 | -4.26892200 | -2.25474100 | C | -2.72592400 | 4.77162700  | -1.66551000 |
| H | -4.43626300 | -4.68488500 | -3.13588500 | H | -2.75168700 | 5.25474400  | -2.63547400 |
| C | -4.38891100 | -4.64700600 | -0.98668900 | C | -2.83221900 | 5.52783600  | -0.50628200 |
| H | -5.19913200 | -5.35911600 | -0.87939900 | H | -2.93859400 | 6.60453900  | -0.56812600 |
| C | -3.77840800 | -4.11218400 | 0.13949500  | C | -2.80618300 | 4.89978500  | 0.73340800  |
| H | -4.11080100 | -4.40602600 | 1.12869100  | H | -2.89497700 | 5.48506200  | 1.64137200  |
| C | -2.74093200 | -3.19636100 | 0.00606900  | C | -2.66871600 | 3.52144900  | 0.81623300  |
| H | -2.26112200 | -2.77466400 | 0.88320200  | H | -2.65631400 | 3.04242700  | 1.78888300  |
| C | -2.51724300 | 1.83635600  | -0.70600600 | P | 1.77683100  | -1.08688500 | -0.31119900 |
| C | -3.04672800 | 3.00963400  | -1.24869000 | P | -0.81522200 | -1.09343200 | -1.88124400 |
| H | -2.40265300 | 3.71162300  | -1.76661300 | P | -2.30356500 | 0.93553100  | -0.21645400 |
| C | -4.39827900 | 3.29112200  | -1.11449500 | C | -3.38788100 | 0.43170700  | 1.17229100  |
| H | -4.80162600 | 4.20485200  | -1.53586700 | C | -4.77511600 | 0.58461100  | 1.10665500  |
| C | -5.23245900 | 2.40771100  | -0.43742100 | C | -2.81045700 | -0.09988900 | 2.32353400  |
| H | -6.28798300 | 2.63141900  | -0.33327400 | C | -5.56842000 | 0.19870400  | 2.17667500  |
| C | -4.71102600 | 1.24386300  | 0.10984000  | H | -5.24026300 | 1.01553700  | 0.22682000  |
| H | -5.35618300 | 0.55589800  | 0.64390400  | C | -3.60750500 | -0.47996200 | 3.39698500  |
| C | -3.35680000 | 0.96048300  | -0.02050400 | H | -1.73239500 | -0.20907400 | 2.37922000  |
| H | -2.95249500 | 0.05541100  | 0.41980500  | C | -4.98567600 | -0.33389000 | 3.32224800  |
| C | 0.09996800  | 3.02296700  | -0.90842600 | H | -6.64423500 | 0.31854700  | 2.12006400  |
| C | 0.62626300  | 3.63079700  | -2.04712800 | H | -3.15124300 | -0.88873300 | 4.29125400  |
| H | 0.57583200  | 3.14202500  | -3.01251900 | H | -5.60900800 | -0.63053300 | 4.15796300  |
| C | 1.22820800  | 4.88122500  | -1.95811900 | C | 1.91121000  | -2.28155500 | 1.07831600  |
| H | 1.63372200  | 5.34533600  | -2.84986000 | C | 2.60214400  | -3.48973300 | 0.95918800  |
| C | 1.30441900  | 5.53398000  | -0.73596700 | C | 1.32631700  | -1.94980500 | 2.29992300  |
| H | 1.76781600  | 6.51169600  | -0.67010900 | C | 2.68939900  | -4.35394800 | 2.04098800  |
| C | 0.78086000  | 4.93227000  | 0.40382100  | H | 3.08566300  | -3.75862400 | 0.02668900  |
| H | 0.83370800  | 5.44002400  | 1.36011400  | C | 1.42358000  | -2.81207100 | 3.38560900  |

|                |             |             |             |                |             |             |             |
|----------------|-------------|-------------|-------------|----------------|-------------|-------------|-------------|
| C              | 0.18543900  | 3.68262400  | 0.32035500  | H              | 0.80377300  | -1.00394300 | 2.40134200  |
| H              | -0.22280900 | 3.22183000  | 1.21421600  | C              | 2.10029000  | -4.01707200 | 3.25498900  |
| Co             | -0.07934300 | -0.37613800 | 0.24676700  | H              | 3.22585300  | -5.29039500 | 1.93911400  |
| P              | 2.03347100  | -1.00039900 | -0.49847000 | H              | 0.97252000  | -2.54124500 | 4.33352100  |
| P              | -0.91305800 | -1.63913600 | -1.42002300 | H              | 2.17557800  | -4.69254400 | 4.09944100  |
| P              | -0.74499100 | 1.39635700  | -0.94795500 | Co             | -0.12859500 | 0.22192000  | -0.27480100 |
| H              | 0.58687000  | 0.63002700  | 1.12600700  | H              | 0.29690300  | 1.18070200  | 0.84636100  |
| H              | 0.29751700  | -2.35279200 | 1.68292500  | H              | -0.18050600 | 2.12321900  | -1.95486600 |
| C              | 0.14602100  | -0.55940000 | 2.41530000  | C              | 0.71814200  | 2.25172400  | -0.25340300 |
| H              | 1.19937100  | -0.58034300 | 2.70560600  | H              | -0.07329900 | 2.93643400  | 0.06509600  |
| C              | -0.68868100 | 0.36964400  | 3.21774200  | C              | 2.02592700  | 2.62037800  | 0.37361000  |
| C              | -0.09523100 | 1.47637900  | 3.82835100  | C              | 2.15392100  | 2.73412600  | 1.75820400  |
| C              | -2.04082500 | 0.11348000  | 3.43961000  | C              | 3.07351100  | 3.03905600  | -0.44109100 |
| C              | -0.84464800 | 2.32339300  | 4.63021300  | C              | 3.31099500  | 3.25019800  | 2.31935500  |
| H              | 0.96293400  | 1.66986000  | 3.67853200  | H              | 1.33870700  | 2.41608500  | 2.40173100  |
| C              | -2.79066200 | 0.96352900  | 4.23991800  | C              | 4.23258800  | 3.55972300  | 0.12127800  |
| H              | -2.48532400 | -0.77090400 | 2.99993700  | H              | 2.95827400  | 2.96904800  | -1.51548300 |
| C              | -2.19740100 | 2.07129700  | 4.83320000  | C              | 4.35467800  | 3.66770100  | 1.49946900  |
| H              | -0.37348400 | 3.17560800  | 5.10660100  | H              | 3.39884300  | 3.33487300  | 3.39670800  |
| H              | -3.83983700 | 0.75368300  | 4.41425400  | H              | 5.03985000  | 3.88962800  | -0.52258700 |
| H              | -2.78349300 | 2.72932600  | 5.46442400  | H              | 5.25686000  | 4.08071500  | 1.93625800  |
| N              | -0.39417800 | -1.61633400 | 1.80564200  | N              | 0.65452700  | 1.75312600  | -1.50524500 |
| <p>fac-III</p> |             |             |             | <p>mer-III</p> |             |             |             |
| C              | 1.84055700  | -1.81277000 | -2.13368000 | C              | 1.57872400  | -2.21478700 | -1.86265600 |
| H              | 1.99189100  | -1.02617300 | -2.87726000 | H              | 2.56261600  | -2.37292200 | -2.30537100 |
| H              | 2.63355500  | -2.54763200 | -2.28902000 | H              | 1.19418100  | -3.18650700 | -1.54526300 |
| C              | 0.46854600  | -2.45887900 | -2.30744600 | C              | 0.61226800  | -1.57829900 | -2.86562200 |
| H              | 0.39410000  | -3.39327200 | -1.74693000 | H              | 0.35199700  | -2.27456300 | -3.66553000 |
| H              | 0.27665500  | -2.70347900 | -3.35572000 | H              | 1.02578300  | -0.66741300 | -3.30333200 |
| C              | -1.26231200 | -0.13328200 | -2.98101700 | C              | -2.13110800 | -0.13866700 | -2.79728800 |
| H              | -1.04060600 | -0.53873700 | -3.97086200 | H              | -1.63095900 | 0.70265200  | -3.28147700 |
| H              | -2.33682600 | 0.05928100  | -2.93726100 | H              | -2.60720400 | -0.74487800 | -3.57082800 |
| C              | -0.49014600 | 1.15905600  | -2.72725200 | C              | -3.14889000 | 0.32280400  | -1.74982500 |
| H              | -0.88819700 | 1.97398700  | -3.33562600 | H              | -3.75063400 | -0.52671400 | -1.41939400 |
| H              | 0.56891200  | 1.04160600  | -2.97007800 | H              | -3.83295200 | 1.07066100  | -2.15398700 |
| C              | 3.52300800  | 0.09703800  | -0.75048000 | C              | 3.46144100  | -0.51612700 | -0.46981500 |
| C              | 4.67077900  | -0.39791100 | -1.37760000 | C              | 3.91429700  | -0.05953100 | -1.70866400 |
| H              | 4.70943600  | -1.42468000 | -1.72417600 | H              | 3.24433500  | -0.01958800 | -2.55900800 |
| C              | 5.78132100  | 0.41476000  | -1.54574300 | C              | 5.22674300  | 0.36287100  | -1.86021300 |
| H              | 6.66626800  | 0.02286200  | -2.03411100 | H              | 5.57206600  | 0.70411400  | -2.82956600 |
| C              | 5.76488500  | 1.72522100  | -1.07806200 | C              | 6.09249700  | 0.35391000  | -0.77384000 |
| H              | 6.63730900  | 2.35603700  | -1.20473200 | H              | 7.11891100  | 0.68101700  | -0.89382100 |
| C              | 4.63418900  | 2.22008000  | -0.44511800 | C              | 5.63768900  | -0.07015900 | 0.46719600  |
| H              | 4.61713600  | 3.23862500  | -0.07549400 | H              | 6.30601100  | -0.07226700 | 1.32051400  |
| C              | 3.51517100  | 1.40954600  | -0.28386000 | C              | 4.32775200  | -0.50388200 | 0.62200200  |
| H              | 2.63292200  | 1.80480900  | 0.20575100  | H              | 3.99189500  | -0.85067900 | 1.59182300  |
| C              | 2.73882100  | -2.27187600 | 0.63357800  | C              | -1.68070500 | -2.66860600 | -1.45786300 |
| C              | 3.46033800  | -1.86978600 | 1.76172300  |                |             |             |             |



|    |             |             |             |    |             |             |             |
|----|-------------|-------------|-------------|----|-------------|-------------|-------------|
| H  | 3.67062900  | -0.81812900 | 1.92557500  | C  | -2.16774900 | -3.48562500 | -2.48282100 |
| C  | 3.94753500  | -2.80853100 | 2.66011000  | H  | -2.06152900 | -3.19187900 | -3.52230000 |
| H  | 4.51576200  | -2.48071500 | 3.52317800  | C  | -2.79196400 | -4.68701200 | -2.18206800 |
| C  | 3.71566800  | -4.16296700 | 2.45149900  | H  | -3.16668100 | -5.31506400 | -2.98211100 |
| H  | 4.09810600  | -4.89570700 | 3.15241000  | C  | -2.93573300 | -5.08439900 | -0.85672100 |
| C  | 3.00007000  | -4.57272900 | 1.33526200  | H  | -3.42405000 | -6.02365700 | -0.62388400 |
| H  | 2.82261300  | -5.62766600 | 1.15946200  | C  | -2.45340200 | -4.27957200 | 0.16557600  |
| C  | 2.51040300  | -3.63404400 | 0.43370200  | H  | -2.56200200 | -4.58769800 | 1.19886600  |
| H  | 1.96543300  | -3.98406300 | -0.43465700 | C  | -1.82709000 | -3.07527100 | -0.13326200 |
| C  | -2.36077300 | -2.51361600 | -1.66279200 | H  | -1.44708200 | -2.45317900 | 0.66878100  |
| C  | -2.96760100 | -2.89969500 | -2.86113000 | C  | -2.49074000 | 2.80769000  | -0.33992400 |
| H  | -2.60866300 | -2.52419300 | -3.81332600 | C  | -2.45571500 | 3.44621600  | -1.58102000 |
| C  | -4.04527400 | -3.77321700 | -2.84334300 | H  | -2.38335500 | 2.87256000  | -2.49841500 |
| H  | -4.51413200 | -4.06872400 | -3.77489900 | C  | -2.53578600 | 4.83108200  | -1.66158200 |
| C  | -4.52169300 | -4.26757700 | -1.63413100 | H  | -2.51484700 | 5.31500000  | -2.63127500 |
| H  | -5.36389900 | -4.94996700 | -1.62362700 | C  | -2.64901300 | 5.59081400  | -0.50510000 |
| C  | -3.92023300 | -3.88608800 | -0.44237000 | H  | -2.71419900 | 6.67068000  | -0.56892300 |
| H  | -4.29276900 | -4.26965100 | 0.50071500  | C  | -2.68238000 | 4.96229000  | 0.73407300  |
| C  | -2.84264400 | -3.00836700 | -0.45075100 | H  | -2.77624800 | 5.55037100  | 1.63971300  |
| H  | -2.36840400 | -2.69892500 | 0.47542800  | C  | -2.59787600 | 3.57977900  | 0.81931900  |
| C  | -2.35942100 | 2.07577900  | -0.71316800 | H  | -2.63284200 | 3.10113100  | 1.79155700  |
| C  | -2.84603900 | 3.23039900  | -1.33185900 | P  | 1.74845200  | -1.16566700 | -0.30671200 |
| H  | -2.18078900 | 3.86721500  | -1.90515500 | P  | -0.84888900 | -1.08284000 | -1.86260900 |
| C  | -4.18072600 | 3.58167100  | -1.19961500 | P  | -2.29643300 | 0.98294500  | -0.20868500 |
| H  | -4.55163200 | 4.47924200  | -1.68118600 | C  | -3.41593600 | 0.52195000  | 1.16858900  |
| C  | -5.03953300 | 2.78966600  | -0.44367100 | C  | -4.79242000 | 0.75193900  | 1.10046300  |
| H  | -6.08144500 | 3.06948900  | -0.33825200 | C  | -2.87462800 | -0.05775100 | 2.31396500  |
| C  | -4.56022500 | 1.64760100  | 0.18155300  | C  | -5.61043800 | 0.39442900  | 2.16177200  |
| H  | -5.22343100 | 1.03379200  | 0.77970600  | H  | -5.22899500 | 1.22048700  | 0.22517600  |
| C  | -3.22340200 | 1.29041800  | 0.04750600  | C  | -3.69535100 | -0.40859700 | 3.37946400  |
| H  | -2.85492000 | 0.40005500  | 0.54685500  | H  | -1.80474800 | -0.23029100 | 2.37127600  |
| C  | 0.31296500  | 3.13799300  | -0.69113600 | C  | -5.06301000 | -0.18566300 | 3.30175600  |
| C  | 1.00628700  | 3.77033900  | -1.72188600 | H  | -6.67783800 | 0.57376800  | 2.10295100  |
| H  | 1.04398700  | 3.33765800  | -2.71409700 | H  | -3.26615400 | -0.85481000 | 4.26922300  |
| C  | 1.66149300  | 4.97446500  | -1.48852100 | H  | -5.70544000 | -0.45948900 | 4.13075000  |
| H  | 2.19420000  | 5.46001800  | -2.29817700 | C  | 1.87863700  | -2.38680600 | 1.05981100  |
| C  | 1.62959400  | 5.55436400  | -0.22821700 | C  | 2.56960900  | -3.59266500 | 0.91944600  |
| H  | 2.13597200  | 6.49611000  | -0.05043200 | C  | 1.28834800  | -2.08061100 | 2.28545200  |
| C  | 0.94124900  | 4.92724600  | 0.80511900  | C  | 2.65199600  | -4.47880300 | 1.98380900  |
| H  | 0.90833200  | 5.37918700  | 1.78984100  | H  | 3.05676400  | -3.84246900 | -0.01650200 |
| C  | 0.28850800  | 3.72526400  | 0.57692400  | C  | 1.38082600  | -2.96420400 | 3.35416500  |
| H  | -0.25749000 | 3.25140700  | 1.38663300  | H  | 0.76292800  | -1.13829700 | 2.40630300  |
| Co | -0.16815400 | -0.37116400 | 0.16143800  | C  | 2.05802200  | -4.16642000 | 3.20192600  |
| P  | 2.04819800  | -0.96936800 | -0.47765400 | H  | 3.18835100  | -5.41330600 | 1.86505700  |
| P  | -0.91187200 | -1.39912700 | -1.65316900 | H  | 0.92541300  | -2.71273500 | 4.30530100  |
| P  | -0.60285900 | 1.56483500  | -0.91715900 | H  | 2.12944000  | -4.85886400 | 4.03283100  |
| H  | 0.29442100  | 0.30505500  | 1.63468600  | Co | -0.13031100 | 0.20707400  | -0.28641400 |
| H  | 0.10988400  | -2.47680200 | 1.48607400  | H  | 0.42314900  | 1.35170500  | 0.72961700  |
| C  | -0.00842100 | -0.65108900 | 2.32334000  | H  | -0.01549500 | 2.14411800  | -1.94930300 |
| H  | 0.96736900  | -0.85631900 | 2.77895800  | C  | 0.78185600  | 2.18372600  | -0.15314200 |
| C  | -0.96092100 | -0.04097300 | 3.32894900  | H  | 0.04410300  | 2.96527200  | 0.06406600  |
| C  | -0.56244500 | 1.06537100  | 4.07904300  | C  | 2.11591400  | 2.60704500  | 0.41744700  |
| C  | -2.21704800 | -0.59443500 | 3.54780200  | C  | 2.31275400  | 2.67103600  | 1.79572900  |

|                                                                                                        |             |             |             |                                                                                                         |             |             |             |
|--------------------------------------------------------------------------------------------------------|-------------|-------------|-------------|---------------------------------------------------------------------------------------------------------|-------------|-------------|-------------|
| C                                                                                                      | -1.41134500 | 1.61377200  | 5.02916400  | C                                                                                                       | 3.10423600  | 3.08803500  | -0.43347400 |
| H                                                                                                      | 0.42410300  | 1.49579700  | 3.92906600  | C                                                                                                       | 3.47908900  | 3.21036300  | 2.31771600  |
| C                                                                                                      | -3.06738400 | -0.04542700 | 4.50066400  | H                                                                                                       | 1.54422400  | 2.30166000  | 2.46988300  |
| H                                                                                                      | -2.50916000 | -1.46587600 | 2.97478100  | C                                                                                                       | 4.27219600  | 3.63037800  | 0.08865800  |
| C                                                                                                      | -2.66963400 | 1.05999300  | 5.24027000  | H                                                                                                       | 2.94124100  | 3.03654400  | -1.50308800 |
| H                                                                                                      | -1.09043800 | 2.47049600  | 5.61096000  | C                                                                                                       | 4.46201000  | 3.69614100  | 1.46248500  |
| H                                                                                                      | -4.04164700 | -0.48960800 | 4.67194600  | H                                                                                                       | 3.62076900  | 3.25719300  | 3.39169600  |
| H                                                                                                      | -3.33196300 | 1.48473200  | 5.98581300  | H                                                                                                       | 5.03563400  | 4.00752800  | -0.58250500 |
| N                                                                                                      | -0.50991700 | -1.67307200 | 1.49114300  | H                                                                                                       | 5.37160400  | 4.12496200  | 1.86746200  |
| 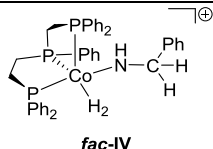 <p><i>fac-IV</i></p> |             |             |             |  <p><i>mer-IV</i></p> |             |             |             |
| C                                                                                                      | 1.59193900  | -1.97414800 | -2.07254100 | C                                                                                                       | -2.78515000 | -1.88741900 | 1.16129300  |
| H                                                                                                      | 2.27354800  | -1.18952300 | -2.40800000 | H                                                                                                       | -3.71600100 | -1.77614600 | 1.71963800  |
| H                                                                                                      | 2.03006300  | -2.93698600 | -2.34318300 | H                                                                                                       | -2.96075300 | -2.58479400 | 0.33809400  |
| C                                                                                                      | 0.21256000  | -1.80049700 | -2.69341500 | C                                                                                                       | -1.65776900 | -2.40322300 | 2.04581900  |
| H                                                                                                      | -0.40058300 | -2.68603400 | -2.50959100 | H                                                                                                       | -1.85455400 | -3.41812600 | 2.39691400  |
| H                                                                                                      | 0.26182000  | -1.65758000 | -3.77542500 | H                                                                                                       | -1.51385600 | -1.76344900 | 2.92063800  |
| C                                                                                                      | -0.22731000 | 1.13980800  | -2.86610100 | C                                                                                                       | 1.34545300  | -2.57105600 | 2.11339200  |
| H                                                                                                      | -0.15636200 | 0.89875100  | -3.93001200 | H                                                                                                       | 1.23149700  | -1.91632100 | 2.98112700  |
| H                                                                                                      | -1.06333400 | 1.83123000  | -2.74108000 | H                                                                                                       | 1.40850400  | -3.60114600 | 2.46991200  |
| C                                                                                                      | 1.06443600  | 1.77443400  | -2.36037800 | C                                                                                                       | 2.56776900  | -2.18519900 | 1.28899800  |
| H                                                                                                      | 1.20100600  | 2.76624200  | -2.79705600 | H                                                                                                       | 2.71207500  | -2.90716800 | 0.48131100  |
| H                                                                                                      | 1.93412000  | 1.18313600  | -2.65539500 | H                                                                                                       | 3.47678200  | -2.16041800 | 1.89201100  |
| C                                                                                                      | 3.12555000  | -1.97650800 | 0.43912000  | C                                                                                                       | -2.99787200 | 0.95692700  | 1.61161100  |
| C                                                                                                      | 4.26396100  | -1.83135000 | -0.35271200 | C                                                                                                       | -2.23918900 | 1.30509700  | 2.72992300  |
| H                                                                                                      | 4.18237200  | -1.63087600 | -1.41384800 | H                                                                                                       | -1.21748600 | 0.95400800  | 2.81213600  |
| C                                                                                                      | 5.52944500  | -1.95248300 | 0.20955200  | C                                                                                                       | -2.77004500 | 2.13979400  | 3.70384100  |
| H                                                                                                      | 6.40648100  | -1.84633200 | -0.41848100 | H                                                                                                       | -2.17363500 | 2.40636500  | 4.56910400  |
| C                                                                                                      | 5.67018300  | -2.21121000 | 1.56562600  | C                                                                                                       | -4.05615000 | 2.64590600  | 3.56227800  |
| H                                                                                                      | 6.65786700  | -2.30960300 | 2.00107800  | H                                                                                                       | -4.46748100 | 3.30428700  | 4.31878000  |
| C                                                                                                      | 4.53949100  | -2.35231900 | 2.36294100  | C                                                                                                       | -4.80928500 | 2.31584000  | 2.44292100  |
| H                                                                                                      | 4.64223300  | -2.56274300 | 3.42134400  | H                                                                                                       | -5.80870600 | 2.71783200  | 2.32171200  |
| C                                                                                                      | 3.27549400  | -2.23662900 | 1.80429600  | C                                                                                                       | -4.28641900 | 1.47251300  | 1.47105300  |
| H                                                                                                      | 2.40192100  | -2.37404500 | 2.43324900  | H                                                                                                       | -4.88218900 | 1.22876400  | 0.59958200  |
| C                                                                                                      | 0.66334800  | -3.43215700 | 0.26320700  | C                                                                                                       | -0.18480400 | -3.84564200 | -0.00570300 |
| C                                                                                                      | 1.31359500  | -4.63840100 | -0.01139700 | C                                                                                                       | -0.31073600 | -5.09498600 | 0.61070700  |
| H                                                                                                      | 2.28408800  | -4.64120500 | -0.49647500 | H                                                                                                       | -0.37638800 | -5.17446800 | 1.69108000  |
| C                                                                                                      | 0.73277400  | -5.84274700 | 0.35551800  | C                                                                                                       | -0.35377200 | -6.25314400 | -0.15078000 |
| H                                                                                                      | 1.24273200  | -6.77461600 | 0.13955300  | H                                                                                                       | -0.45262700 | -7.21567800 | 0.33788300  |
| C                                                                                                      | -0.49659900 | -5.85492200 | 1.00746900  | C                                                                                                       | -0.27106900 | -6.17907700 | -1.53728200 |
| H                                                                                                      | -0.94572700 | -6.79782500 | 1.29771700  | H                                                                                                       | -0.30608600 | -7.08502800 | -2.13126800 |
| C                                                                                                      | -1.14239600 | -4.66011500 | 1.29160600  | C                                                                                                       | -0.14406200 | -4.94459900 | -2.15730700 |
| H                                                                                                      | -2.09606300 | -4.66603700 | 1.80710800  | H                                                                                                       | -0.07923000 | -4.88154700 | -3.23742100 |
| C                                                                                                      | -0.56542500 | -3.45005000 | 0.92050900  | C                                                                                                       | -0.10080700 | -3.78252100 | -1.39530500 |
| H                                                                                                      | -1.07060300 | -2.51360700 | 1.14107700  | H                                                                                                       | -0.00026200 | -2.82565600 | -1.89118800 |
| C                                                                                                      | -2.44717700 | -0.69493400 | -2.32806900 | C                                                                                                       | 3.05199500  | 0.65368700  | 1.69943000  |
| C                                                                                                      | -3.09956300 | -0.03483800 | -3.37164500 | C                                                                                                       | 2.33916700  | 1.04567900  | 2.83490100  |
| H                                                                                                      | -2.59055000 | 0.71851000  | -3.96018200 | H                                                                                                       | 1.30457800  | 0.74494100  | 2.94985200  |

|    |             |             |             |    |             |             |             |
|----|-------------|-------------|-------------|----|-------------|-------------|-------------|
| C  | -4.41755100 | -0.34496900 | -3.67909100 | C  | 2.93745800  | 1.85042100  | 3.79473900  |
| H  | -4.91364700 | 0.17188600  | -4.49247500 | H  | 2.37639600  | 2.15102700  | 4.67221900  |
| C  | -5.09617200 | -1.31303500 | -2.95060300 | C  | 4.24752000  | 2.27987500  | 3.62441000  |
| H  | -6.12561400 | -1.55110100 | -3.19189500 | H  | 4.71262900  | 2.91348100  | 4.37081700  |
| C  | -4.45416500 | -1.97325300 | -1.91075100 | C  | 4.95752800  | 1.90400100  | 2.49124600  |
| H  | -4.98138200 | -2.72447600 | -1.33452500 | H  | 5.97725600  | 2.24360500  | 2.35064600  |
| C  | -3.13791800 | -1.66595700 | -1.59756800 | C  | 4.36627900  | 1.09246000  | 1.53198000  |
| H  | -2.65075500 | -2.17486900 | -0.77394200 | H  | 4.92944100  | 0.80681200  | 0.65170200  |
| C  | 0.21891700  | 3.39271500  | -0.05487000 | Co | 0.01740400  | -0.24094800 | 0.18297000  |
| C  | 0.30718700  | 3.83491900  | 1.26799000  | P  | -2.29450300 | -0.24364700 | 0.40401400  |
| H  | 0.91192800  | 3.28929200  | 1.98522900  | P  | -0.12462400 | -2.31372800 | 1.01645400  |
| C  | -0.35053200 | 4.98602900  | 1.67379100  | P  | 2.26685300  | -0.51187400 | 0.50933600  |
| H  | -0.26383500 | 5.32080200  | 2.70113900  | H  | -0.36222400 | -0.58994000 | -1.56581800 |
| C  | -1.11797100 | 5.70827400  | 0.76670800  | C  | 3.35702600  | -0.46727800 | -0.96650700 |
| H  | -1.63322200 | 6.60745800  | 1.08381600  | C  | 4.37725300  | -1.39675800 | -1.17589200 |
| C  | -1.21432500 | 5.27620600  | -0.54805100 | C  | 3.16701500  | 0.55931800  | -1.89485500 |
| H  | -1.80380700 | 5.83803100  | -1.26376900 | C  | 5.18769700  | -1.30481600 | -2.30037600 |
| C  | -0.54914000 | 4.12539500  | -0.95759000 | H  | 4.55881400  | -2.19422000 | -0.46579900 |
| H  | -0.62911900 | 3.82295600  | -1.99468800 | C  | 3.98603900  | 0.65277700  | -3.01143800 |
| C  | 2.86753400  | 2.36075500  | -0.16912200 | H  | 2.38364400  | 1.29421400  | -1.74149400 |
| C  | 3.41052300  | 3.49978000  | -0.77117500 | C  | 4.99386700  | -0.28142900 | -3.21871100 |
| H  | 2.81323100  | 4.09989600  | -1.44879100 | H  | 5.97586600  | -2.03292700 | -2.45416500 |
| C  | 4.71012000  | 3.88907900  | -0.48669300 | H  | 3.83387100  | 1.45765700  | -3.72114300 |
| H  | 5.12332000  | 4.77295900  | -0.95916900 | H  | 5.62968000  | -0.21004700 | -4.09366100 |
| C  | 5.47692900  | 3.15605400  | 0.41395900  | C  | -3.37913900 | -0.13344900 | -1.07883300 |
| H  | 6.48968300  | 3.46809600  | 0.64216500  | C  | -4.57783800 | -0.84674200 | -1.17027500 |
| C  | 4.94078800  | 2.03236100  | 1.02526000  | C  | -3.00288100 | 0.69166800  | -2.13992700 |
| H  | 5.53110100  | 1.46199400  | 1.73274800  | C  | -5.37752500 | -0.73621600 | -2.30003100 |
| C  | 3.64076200  | 1.63380800  | 0.73260400  | H  | -4.90388200 | -1.49162700 | -0.36309400 |
| H  | 3.23195800  | 0.75096000  | 1.20945500  | C  | -3.80867600 | 0.80672800  | -3.26504900 |
| Co | -0.01387500 | -0.11041400 | 0.19841700  | H  | -2.08048400 | 1.25772000  | -2.09261300 |
| P  | 1.42031100  | -1.82490700 | -0.22934600 | C  | -4.99523300 | 0.09058300  | -3.34883900 |
| P  | -0.69580000 | -0.37867900 | -1.90180000 | H  | -6.30352300 | -1.29680500 | -2.35796100 |
| P  | 1.12868900  | 1.85091900  | -0.49974800 | H  | -3.50461100 | 1.45674700  | -4.07732500 |
| N  | -1.72170600 | 0.28523100  | 0.75735200  | H  | -5.62203600 | 0.17702500  | -4.22887200 |
| H  | -2.47393300 | 0.34847300  | 0.08032100  | N  | 0.22331200  | 1.58776400  | 0.36065800  |
| H  | 0.35000800  | -0.41666500 | 1.79527100  | H  | 1.16332300  | 1.92329400  | 0.53510400  |
| H  | 0.58054300  | 0.35426800  | 1.68528700  | H  | 0.41943000  | -0.57506200 | -1.55866200 |
| C  | -2.09979200 | 1.07017500  | 1.92953200  | C  | -0.59638700 | 2.73586300  | 0.02061200  |
| H  | -1.42930700 | 0.82082500  | 2.75844000  | H  | -1.62062500 | 2.40970200  | -0.17848300 |
| H  | -1.98103000 | 2.14663100  | 1.74770900  | H  | -0.67060800 | 3.41050200  | 0.88527800  |
| C  | -3.52694800 | 0.79894100  | 2.33772500  | C  | -0.10512200 | 3.55568400  | -1.15700700 |
| C  | -3.85300800 | -0.34690600 | 3.06398700  | C  | 0.18184900  | 2.96288700  | -2.38753800 |
| C  | -4.55042500 | 1.66982300  | 1.96912700  | C  | 0.04815600  | 4.93546000  | -1.03877800 |
| C  | -5.16848800 | -0.61432400 | 3.41568000  | C  | 0.59787200  | 3.72618300  | -3.47001000 |
| H  | -3.06462900 | -1.02904200 | 3.36674300  | H  | 0.08382900  | 1.88805900  | -2.49578000 |
| C  | -5.87019200 | 1.40340300  | 2.31482600  | C  | 0.46751400  | 5.70492900  | -2.11820800 |
| H  | -4.31037900 | 2.57214400  | 1.41480600  | H  | -0.16538200 | 5.41540500  | -0.08860100 |
| C  | -6.18187500 | 0.26055500  | 3.03924400  | C  | 0.74250900  | 5.10301900  | -3.33838200 |
| H  | -5.40517700 | -1.50145600 | 3.99285100  | H  | 0.80658800  | 3.24819700  | -4.42130700 |
| H  | -6.65448100 | 2.09445400  | 2.02653300  | H  | 0.58117100  | 6.77718400  | -2.00374300 |
| H  | -7.20927700 | 0.05559400  | 3.31798500  | H  | 1.06806600  | 5.70125700  | -4.18172000 |

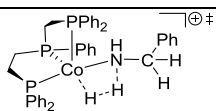

*fac*-TS2

|   |             |             |             |
|---|-------------|-------------|-------------|
| C | -1.74056500 | -1.95925500 | 1.99552200  |
| H | -2.41623600 | -1.15512300 | 2.29559500  |
| H | -2.23923200 | -2.90707300 | 2.20769100  |
| C | -0.41117800 | -1.86163900 | 2.73421800  |
| H | 0.16751300  | -2.77738400 | 2.59205200  |
| H | -0.54797900 | -1.72852700 | 3.80987100  |
| C | 0.24373400  | 1.03740000  | 3.03176200  |
| H | 0.14638200  | 0.78146300  | 4.09006000  |
| H | 1.11633500  | 1.68600400  | 2.92937800  |
| C | -1.00655100 | 1.74401800  | 2.51367500  |
| H | -1.09971600 | 2.73354600  | 2.96598100  |
| H | -1.90735600 | 1.18822700  | 2.78442800  |
| C | -3.08371600 | -1.82733100 | -0.61994200 |
| C | -4.27382200 | -1.78332800 | 0.10403700  |
| H | -4.26721600 | -1.70319600 | 1.18406400  |
| C | -5.49647000 | -1.84934100 | -0.55454700 |
| H | -6.41575300 | -1.81966600 | 0.01900900  |
| C | -5.54054600 | -1.95569900 | -1.93714100 |
| H | -6.49494600 | -2.01230000 | -2.44781800 |
| C | -4.35644300 | -1.99507100 | -2.66591900 |
| H | -4.38458900 | -2.08311400 | -3.74600900 |
| C | -3.13538000 | -1.92995600 | -2.01256800 |
| H | -2.21777000 | -1.97330700 | -2.59036200 |
| C | -0.70506000 | -3.39295000 | -0.31846200 |
| C | -1.38326200 | -4.58541200 | -0.05307600 |
| H | -2.35244600 | -4.56944500 | 0.43428900  |
| C | -0.83465400 | -5.80087000 | -0.43344700 |
| H | -1.36751300 | -6.72128400 | -0.22375900 |
| C | 0.39045500  | -5.83888900 | -1.09196700 |
| H | 0.81368300  | -6.79006800 | -1.39376400 |
| C | 1.06388100  | -4.65810600 | -1.37062500 |
| H | 2.01232500  | -4.68180500 | -1.89515400 |
| C | 0.51863700  | -3.43844400 | -0.98403500 |
| H | 1.04748600  | -2.51794800 | -1.21074500 |
| C | 2.34612400  | -0.94576800 | 2.48967700  |
| C | 3.08327900  | -0.27600300 | 3.46705400  |
| H | 2.65929100  | 0.55885000  | 4.01092600  |
| C | 4.37733800  | -0.68148400 | 3.76828300  |
| H | 4.93875900  | -0.15612800 | 4.53226200  |
| C | 4.94875200  | -1.75409900 | 3.09761500  |
| H | 5.95923200  | -2.06651300 | 3.33399800  |
| C | 4.22155500  | -2.42693100 | 2.12322600  |
| H | 4.66227600  | -3.26472700 | 1.59552700  |
| C | 2.92949200  | -2.02425800 | 1.81780600  |
| H | 2.37222400  | -2.55960900 | 1.05565700  |
| C | -0.13668800 | 3.41939600  | 0.26088000  |
| C | -0.29593000 | 3.96255200  | -1.01659700 |

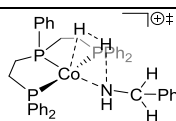

*mer*-TS2

|    |             |             |             |
|----|-------------|-------------|-------------|
| C  | 0.03197000  | 2.73652500  | 1.62059200  |
| H  | 0.72274900  | 3.55703400  | 1.82066700  |
| H  | -0.97851300 | 3.10615300  | 1.81031000  |
| C  | 0.32771700  | 1.52295400  | 2.50607600  |
| H  | 0.08564300  | 1.72128000  | 3.55203200  |
| H  | 1.36762600  | 1.20285400  | 2.41408700  |
| C  | -0.23577700 | -1.50821100 | 2.53452300  |
| H  | 0.84719700  | -1.60152400 | 2.43732600  |
| H  | -0.50416800 | -1.58809500 | 3.58976200  |
| C  | -0.97259000 | -2.55030200 | 1.68929600  |
| H  | -2.04709400 | -2.49923100 | 1.87979700  |
| H  | -0.65630500 | -3.56392600 | 1.93592300  |
| C  | 1.63163400  | 2.99685500  | -0.85566900 |
| C  | 2.76390900  | 3.14694400  | -0.05371700 |
| H  | 2.74670800  | 2.86478800  | 0.99257100  |
| C  | 3.93921400  | 3.65639200  | -0.59168500 |
| H  | 4.81202400  | 3.76868600  | 0.04072100  |
| C  | 3.99557600  | 4.01463700  | -1.93152200 |
| H  | 4.91258400  | 4.41425000  | -2.34874300 |
| C  | 2.87317000  | 3.86026300  | -2.73651200 |
| H  | 2.91067400  | 4.14253400  | -3.78243300 |
| C  | 1.69746500  | 3.35072700  | -2.20484700 |
| H  | 0.82484900  | 3.24858800  | -2.84024000 |
| C  | -2.39223900 | 0.46321100  | 2.35342600  |
| C  | -2.73496100 | 0.40286400  | 3.70790100  |
| H  | -1.99085100 | 0.14781200  | 4.45560000  |
| C  | -4.03369900 | 0.67233400  | 4.11291900  |
| H  | -4.29173100 | 0.62230100  | 5.16450700  |
| C  | -5.00160200 | 1.00760600  | 3.17177300  |
| H  | -6.01600400 | 1.21761200  | 3.49073900  |
| C  | -4.66830400 | 1.07328700  | 1.82628200  |
| H  | -5.42024200 | 1.33519100  | 1.09111200  |
| C  | -3.36821900 | 0.80109000  | 1.41755600  |
| H  | -3.11382800 | 0.85273700  | 0.36523400  |
| C  | 0.29585100  | -3.50882200 | -0.85180800 |
| C  | 0.97181900  | -4.45578100 | -0.08606600 |
| H  | 0.90731500  | -4.45293300 | 0.99510900  |
| C  | 1.75803900  | -5.42287200 | -0.70171500 |
| H  | 2.28012500  | -6.15356300 | -0.09485600 |
| C  | 1.87550400  | -5.45230300 | -2.08377900 |
| H  | 2.48857200  | -6.20780900 | -2.56116600 |
| C  | 1.20382700  | -4.50967500 | -2.85407900 |
| H  | 1.28901100  | -4.52846800 | -3.93449200 |
| C  | 0.42219000  | -3.54161600 | -2.24282800 |
| H  | -0.10104300 | -2.81494800 | -2.85572100 |
| Co | -0.08838600 | -0.01038600 | -0.28370500 |
| P  | 0.07785700  | 2.26904900  | -0.19517500 |

|                                                                                                         |             |             |             |                                                                                                          |             |             |             |
|---------------------------------------------------------------------------------------------------------|-------------|-------------|-------------|----------------------------------------------------------------------------------------------------------|-------------|-------------|-------------|
| H                                                                                                       | -0.95433300 | 3.48316500  | -1.73324000 | P                                                                                                        | -0.66980800 | 0.13401600  | 1.81867000  |
| C                                                                                                       | 0.36330200  | 5.12893400  | -1.37381300 | P                                                                                                        | -0.76906800 | -2.18805200 | -0.13998800 |
| H                                                                                                       | 0.22234900  | 5.54318300  | -2.36561200 | H                                                                                                        | 0.39624300  | -0.13470200 | -1.83539600 |
| C                                                                                                       | 1.19807800  | 5.76745800  | -0.46370500 | C                                                                                                        | -2.41287800 | -2.58068000 | -0.86289200 |
| H                                                                                                       | 1.71248900  | 6.67947000  | -0.74328100 | C                                                                                                        | -3.02109600 | -3.81814900 | -0.63859800 |
| C                                                                                                       | 1.36292300  | 5.23538100  | 0.80703200  | C                                                                                                        | -3.05239200 | -1.64171600 | -1.66776700 |
| H                                                                                                       | 2.00488700  | 5.73168200  | 1.52604400  | C                                                                                                        | -4.25762200 | -4.09783900 | -1.20032200 |
| C                                                                                                       | 0.70049000  | 4.06721700  | 1.16763300  | H                                                                                                        | -2.52669200 | -4.57261100 | -0.03622600 |
| H                                                                                                       | 0.83847300  | 3.68279600  | 2.17093700  | C                                                                                                        | -4.28859900 | -1.92592800 | -2.23601200 |
| C                                                                                                       | -2.75973700 | 2.30616500  | 0.26104700  | H                                                                                                        | -2.57734500 | -0.68433000 | -1.85516500 |
| C                                                                                                       | -3.44592900 | 3.26615800  | 1.01043800  | C                                                                                                        | -4.89275200 | -3.15257000 | -1.99953000 |
| H                                                                                                       | -2.96999300 | 3.74886000  | 1.85675400  | H                                                                                                        | -4.72476900 | -5.05943700 | -1.02121600 |
| C                                                                                                       | -4.73911400 | 3.62876600  | 0.66567800  | H                                                                                                        | -4.77731500 | -1.19086500 | -2.86521600 |
| H                                                                                                       | -5.26450500 | 4.37267500  | 1.25375400  | H                                                                                                        | -5.85647400 | -3.37758600 | -2.44164200 |
| C                                                                                                       | -5.35504100 | 3.05089700  | -0.43992100 | C                                                                                                        | -1.23767800 | 3.27398600  | -0.98555900 |
| H                                                                                                       | -6.36307500 | 3.34249000  | -0.71192100 | C                                                                                                        | -1.44323100 | 4.61188400  | -0.64122200 |
| C                                                                                                       | -4.67519600 | 2.10750500  | -1.19638400 | C                                                                                                        | -2.02673600 | 2.69587400  | -1.97860400 |
| H                                                                                                       | -5.14866000 | 1.65682300  | -2.06068200 | C                                                                                                        | -2.43372700 | 5.34942900  | -1.27318500 |
| C                                                                                                       | -3.38317900 | 1.73283500  | -0.84489800 | H                                                                                                        | -0.82614600 | 5.08750300  | 0.11299900  |
| H                                                                                                       | -2.86039600 | 0.98854600  | -1.43378800 | C                                                                                                        | -3.01231500 | 3.43917400  | -2.61730300 |
| Co                                                                                                      | 0.06994200  | -0.09778600 | -0.07340800 | H                                                                                                        | -1.86026600 | 1.66162600  | -2.26250900 |
| P                                                                                                       | -1.42736600 | -1.76822500 | 0.17318000  | C                                                                                                        | -3.21897900 | 4.76470400  | -2.26113500 |
| P                                                                                                       | 0.63292900  | -0.48152400 | 2.03806400  | H                                                                                                        | -2.58900700 | 6.38665900  | -0.99935400 |
| P                                                                                                       | -1.02125300 | 1.84729900  | 0.64890000  | H                                                                                                        | -3.61644700 | 2.98326500  | -3.39335400 |
| N                                                                                                       | 1.82189400  | 0.31741700  | -0.74407300 | H                                                                                                        | -3.98830200 | 5.34637500  | -2.75577600 |
| H                                                                                                       | 2.56816200  | -0.17522700 | -0.26925500 | N                                                                                                        | 1.90170100  | -0.16214500 | 0.31633700  |
| H                                                                                                       | 0.63485000  | -0.06401200 | -1.55976200 | H                                                                                                        | 2.45781000  | 0.61078800  | -0.03696500 |
| H                                                                                                       | -0.31064300 | 0.07104800  | -1.63142300 | H                                                                                                        | 1.10130200  | -0.19214300 | -1.31010300 |
| C                                                                                                       | 2.33859100  | 1.42754900  | -1.53813200 | C                                                                                                        | 2.74921300  | -1.35180800 | 0.24886000  |
| H                                                                                                       | 1.54436400  | 1.77687400  | -2.20664200 | H                                                                                                        | 2.32327700  | -2.13476800 | 0.88759400  |
| H                                                                                                       | 2.58833600  | 2.28252000  | -0.89769500 | H                                                                                                        | 2.81946100  | -1.80136700 | -0.75522000 |
| C                                                                                                       | 3.55459600  | 1.03997800  | -2.34372500 | C                                                                                                        | 4.15029300  | -1.04983200 | 0.72285000  |
| C                                                                                                       | 3.43152600  | 0.23505700  | -3.47733900 | C                                                                                                        | 5.19485200  | -0.90913900 | -0.18846200 |
| C                                                                                                       | 4.82528600  | 1.46033100  | -1.95836200 | C                                                                                                        | 4.42288900  | -0.86635100 | 2.07941100  |
| C                                                                                                       | 4.55013900  | -0.13823300 | -4.20776100 | C                                                                                                        | 6.47953300  | -0.59358100 | 0.24057800  |
| H                                                                                                       | 2.44722200  | -0.09264500 | -3.79808900 | H                                                                                                        | 5.00155500  | -1.05697400 | -1.24668200 |
| C                                                                                                       | 5.94999100  | 1.08627600  | -2.68569300 | C                                                                                                        | 5.70326400  | -0.55464600 | 2.51394500  |
| H                                                                                                       | 4.93543100  | 2.09527000  | -1.08448500 | H                                                                                                        | 3.62107700  | -0.97679100 | 2.80310100  |
| C                                                                                                       | 5.81451400  | 0.28572200  | -3.81133100 | C                                                                                                        | 6.73671600  | -0.41508600 | 1.59300900  |
| H                                                                                                       | 4.43792200  | -0.75348200 | -5.09367500 | H                                                                                                        | 7.28151700  | -0.49427500 | -0.48261700 |
| H                                                                                                       | 6.93176400  | 1.42650300  | -2.37577900 | H                                                                                                        | 5.90078200  | -0.42817300 | 3.57291000  |
| H                                                                                                       | 6.68890900  | -0.00153500 | -4.38413900 | H                                                                                                        | 7.73876300  | -0.17629400 | 1.93100200  |
| 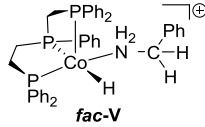 <p><i>fac-V</i></p> |             |             |             |  <p><i>mer-V</i></p> |             |             |             |
| C                                                                                                       | 2.25730500  | 1.60106100  | 1.75290000  | C                                                                                                        | 0.91734300  | -2.62615100 | 1.73622100  |
| H                                                                                                       | 2.66013600  | 0.65821000  | 2.13155500  | H                                                                                                        | 0.51573900  | -3.59256800 | 2.04305300  |
| H                                                                                                       | 3.00786500  | 2.37522700  | 1.92584900  | H                                                                                                        | 2.00551400  | -2.72552900 | 1.74326700  |
| C                                                                                                       | 0.94528300  | 1.95400400  | 2.44203200  | C                                                                                                        | 0.49999200  | -1.51085100 | 2.70575700  |
| H                                                                                                       | 0.67784600  | 2.99121400  | 2.22855300  | H                                                                                                        | 0.96506300  | -1.64929100 | 3.68387800  |

|   |             |             |             |    |             |             |             |
|---|-------------|-------------|-------------|----|-------------|-------------|-------------|
| H | 1.01730500  | 1.85827300  | 3.52802900  | H  | -0.58273800 | -1.47994300 | 2.84064200  |
| C | -0.59189200 | -0.51941500 | 2.98804500  | C  | 0.44025800  | 1.64053700  | 2.64733600  |
| H | -0.47674300 | -0.17585800 | 4.01940700  | H  | -0.64320000 | 1.57991600  | 2.77166300  |
| H | -1.60477800 | -0.91642100 | 2.88686800  | H  | 0.88690200  | 1.82941800  | 3.62554500  |
| C | 0.43217200  | -1.59894900 | 2.64683600  | C  | 0.83007300  | 2.73366900  | 1.64245400  |
| H | 0.21962800  | -2.52187300 | 3.19051000  | H  | 1.91511500  | 2.86301100  | 1.64500900  |
| H | 1.43686700  | -1.28701000 | 2.94306900  | H  | 0.40070700  | 3.69928200  | 1.91318800  |
| C | 3.55650100  | 0.88621800  | -0.78529400 | C  | -1.01844000 | -3.18744500 | -0.47374000 |
| C | 4.70846700  | 0.72314900  | -0.01801600 | C  | -1.68293100 | -4.02651400 | 0.41937100  |
| H | 4.68183800  | 0.83733700  | 1.05866000  | H  | -1.34826200 | -4.12888500 | 1.44460300  |
| C | 5.91821700  | 0.40981400  | -0.62793700 | C  | -2.78921800 | -4.76095500 | 0.00441300  |
| H | 6.80767900  | 0.28528700  | -0.02094900 | H  | -3.29258800 | -5.41467600 | 0.70758400  |
| C | 5.98806100  | 0.26145000  | -2.00547200 | C  | -3.24269900 | -4.66275900 | -1.30349000 |
| H | 6.93348000  | 0.02371100  | -2.47944300 | H  | -4.09923700 | -5.24287300 | -1.62698600 |
| C | 4.84150400  | 0.42139500  | -2.77682400 | C  | -2.59256900 | -3.81891500 | -2.19773900 |
| H | 4.89016000  | 0.30869100  | -3.85395500 | H  | -2.94163800 | -3.73686700 | -3.22075700 |
| C | 3.63267800  | 0.72761400  | -2.17101800 | C  | -1.49264000 | -3.08082000 | -1.78535900 |
| H | 2.74217200  | 0.84694400  | -2.77904800 | H  | -0.98783200 | -2.42625600 | -2.48862000 |
| C | 1.69913600  | 3.06289400  | -0.70484000 | C  | 2.84442200  | 0.10113800  | 2.13933800  |
| C | 2.63731700  | 4.06810100  | -0.46223200 | C  | 3.38047800  | 0.15979800  | 3.42909700  |
| H | 3.53609600  | 3.85437800  | 0.10623200  | H  | 2.72896500  | 0.18394900  | 4.29701500  |
| C | 2.44197600  | 5.34531400  | -0.96708900 | C  | 4.75468700  | 0.18830000  | 3.61541600  |
| H | 3.17596800  | 6.11907900  | -0.77291900 | H  | 5.16224100  | 0.23410900  | 4.61883100  |
| C | 1.31432500  | 5.63073600  | -1.72982000 | C  | 5.60727500  | 0.15789800  | 2.51662600  |
| H | 1.16807600  | 6.62786200  | -2.12892900 | H  | 6.68088500  | 0.18008800  | 2.66422400  |
| C | 0.38321300  | 4.63428100  | -1.98799700 | C  | 5.08330900  | 0.09908300  | 1.23291000  |
| H | -0.48996800 | 4.84898000  | -2.59376500 | H  | 5.74519800  | 0.07489100  | 0.37502900  |
| C | 0.57571800  | 3.35658100  | -1.47494400 | C  | 3.70660800  | 0.07108900  | 1.04441500  |
| H | -0.14697700 | 2.57416400  | -1.68514300 | H  | 3.30158700  | 0.02546100  | 0.03933800  |
| C | -1.92595200 | 1.97107400  | 2.22626700  | C  | -1.16340300 | 3.12613200  | -0.53055000 |
| C | -2.86661100 | 1.63908700  | 3.20118900  | C  | -1.90265800 | 3.86075800  | 0.39565600  |
| H | -2.77323100 | 0.72745900  | 3.77830800  | H  | -1.57774500 | 3.94756000  | 1.42566100  |
| C | -3.94028000 | 2.48384600  | 3.45962700  | C  | -3.07202200 | 4.50650000  | 0.00799100  |
| H | -4.66176700 | 2.21406900  | 4.22237200  | H  | -3.63354100 | 5.08109100  | 0.73585900  |
| C | -4.08638700 | 3.66792100  | 2.75112500  | C  | -3.51484300 | 4.42177300  | -1.30402200 |
| H | -4.92306900 | 4.32542200  | 2.95659800  | H  | -4.42373800 | 4.92961200  | -1.60493500 |
| C | -3.15353000 | 4.00783800  | 1.77801500  | C  | -2.78888400 | 3.68230000  | -2.23135100 |
| H | -3.25897100 | 4.93258400  | 1.22220500  | H  | -3.13039800 | 3.61110200  | -3.25764400 |
| C | -2.08524300 | 3.16358000  | 1.51308200  | C  | -1.62540000 | 3.03253400  | -1.84755700 |
| H | -1.36723300 | 3.44042000  | 0.74690000  | H  | -1.06579400 | 2.45374200  | -2.57475800 |
| C | -0.77377400 | -3.14430500 | 0.44662300  | Co | 0.30042400  | 0.01023600  | -0.19784600 |
| C | -0.79636400 | -3.69760600 | -0.83853700 | P  | 0.48837100  | -2.20805900 | -0.05165100 |
| H | -0.04227500 | -3.41023900 | -1.56485200 | P  | 1.02710400  | 0.06044600  | 1.87305200  |
| C | -1.74973300 | -4.64470700 | -1.18475300 | P  | 0.40268800  | 2.24070500  | -0.12485800 |
| H | -1.74247000 | -5.07551900 | -2.17958800 | H  | 0.05124800  | -0.01518300 | -1.70354700 |
| C | -2.70426500 | -5.04700600 | -0.25688100 | C  | 1.65645100  | 3.12340400  | -1.13440900 |
| H | -3.44492600 | -5.79163400 | -0.52455700 | C  | 1.94525300  | 4.47253900  | -0.91672200 |
| C | -2.69530600 | -4.49883600 | 1.01810900  | C  | 2.32396000  | 2.43267600  | -2.14349900 |
| H | -3.43036300 | -4.81331800 | 1.75049800  | C  | 2.89876600  | 5.11434700  | -1.69256100 |
| C | -1.73801700 | -3.55188700 | 1.36789500  | H  | 1.42033100  | 5.03160900  | -0.14958500 |
| H | -1.74590200 | -3.15565400 | 2.37650900  | C  | 3.27624300  | 3.08010200  | -2.92215500 |
| C | 2.06364600  | -2.85859500 | 0.58359400  | H  | 2.08171200  | 1.39101100  | -2.32483100 |
| C | 2.42729400  | -3.86802800 | 1.47951400  | C  | 3.56636100  | 4.41821500  | -2.69509600 |

|                                                                                                  |             |             |             |                                                                                                  |             |             |             |
|--------------------------------------------------------------------------------------------------|-------------|-------------|-------------|--------------------------------------------------------------------------------------------------|-------------|-------------|-------------|
| H                                                                                                | 1.81167200  | -4.08752600 | 2.34470100  | H                                                                                                | 3.11826100  | 6.16169500  | -1.51952200 |
| C                                                                                                | 3.57592900  | -4.61430600 | 1.26149200  | H                                                                                                | 3.78917500  | 2.53851200  | -3.70885700 |
| H                                                                                                | 3.85237500  | -5.39384300 | 1.96236900  | H                                                                                                | 4.30869100  | 4.92345800  | -3.30231500 |
| C                                                                                                | 4.36430800  | -4.37150300 | 0.14136000  | C                                                                                                | 1.80208900  | -3.06113900 | -1.01262800 |
| H                                                                                                | 5.25811900  | -4.96073900 | -0.02924400 | C                                                                                                | 2.19687200  | -4.36527800 | -0.70649200 |
| C                                                                                                | 4.00281000  | -3.37825700 | -0.75737900 | C                                                                                                | 2.39973500  | -2.39693300 | -2.08180500 |
| H                                                                                                | 4.61274100  | -3.18567600 | -1.63223700 | C                                                                                                | 3.18505900  | -4.98799400 | -1.45415900 |
| C                                                                                                | 2.85837000  | -2.62084900 | -0.53572900 | H                                                                                                | 1.72916600  | -4.90596600 | 0.10917000  |
| H                                                                                                | 2.58279700  | -1.83765100 | -1.23192900 | C                                                                                                | 3.38653400  | -3.02572300 | -2.83234100 |
| Co                                                                                               | 0.09099800  | 0.12833500  | -0.24213900 | H                                                                                                | 2.07705800  | -1.39171200 | -2.33128900 |
| P                                                                                                | 1.93218100  | 1.34766000  | -0.06166400 | C                                                                                                | 3.78215600  | -4.31818600 | -2.51706700 |
| P                                                                                                | -0.47791600 | 0.91521100  | 1.80694900  | H                                                                                                | 3.48666400  | -6.00052900 | -1.21147900 |
| P                                                                                                | 0.52440000  | -1.87707400 | 0.80338300  | H                                                                                                | 3.84466000  | -2.50494400 | -3.66556700 |
| N                                                                                                | -1.69291300 | -0.27266400 | -1.19970100 | H                                                                                                | 4.55181500  | -4.80860700 | -3.10199300 |
| H                                                                                                | -1.62272400 | 0.17662300  | -2.10966600 | N                                                                                                | -1.92098200 | -0.02510400 | 0.04764300  |
| H                                                                                                | -1.65130900 | -1.26805000 | -1.40913500 | H                                                                                                | -2.21589300 | 0.87897900  | -0.31340000 |
| H                                                                                                | 0.71898900  | -0.33576600 | -1.51229800 | H                                                                                                | -2.15163200 | -0.68811100 | -0.68700200 |
| C                                                                                                | -3.03935600 | 0.02841100  | -0.64031500 | C                                                                                                | -2.74315000 | -0.34337200 | 1.23601700  |
| H                                                                                                | -3.16383200 | -0.58746600 | 0.25193300  | H                                                                                                | -2.50199700 | -1.36674800 | 1.53182800  |
| H                                                                                                | -3.04308200 | 1.07019500  | -0.32021800 | H                                                                                                | -2.43315700 | 0.31527000  | 2.05029600  |
| C                                                                                                | -4.15226700 | -0.22452800 | -1.62153100 | C                                                                                                | -4.22892000 | -0.20855900 | 1.01873300  |
| C                                                                                                | -4.68169600 | -1.50482500 | -1.78568200 | C                                                                                                | -4.92933400 | -1.18131800 | 0.30407300  |
| C                                                                                                | -4.64615300 | 0.81382100  | -2.41075500 | C                                                                                                | -4.92380800 | 0.89557400  | 1.50768800  |
| C                                                                                                | -5.67680300 | -1.74236500 | -2.72414300 | C                                                                                                | -6.29165600 | -1.04665900 | 0.07653100  |
| H                                                                                                | -4.31861000 | -2.32160000 | -1.16908700 | H                                                                                                | -4.40625200 | -2.05638100 | -0.07006400 |
| C                                                                                                | -5.64139000 | 0.57850100  | -3.35066200 | C                                                                                                | -6.28852800 | 1.03124500  | 1.28428300  |
| H                                                                                                | -4.25855500 | 1.81993200  | -2.27990200 | H                                                                                                | -4.39485400 | 1.65543300  | 2.07465400  |
| C                                                                                                | -6.15725500 | -0.70127400 | -3.50963900 | C                                                                                                | -6.97456400 | 0.06080200  | 0.56653600  |
| H                                                                                                | -6.08503500 | -2.74022300 | -2.83795700 | H                                                                                                | -6.82547600 | -1.81187400 | -0.47565700 |
| H                                                                                                | -6.02057200 | 1.39604700  | -3.95317500 | H                                                                                                | -6.81744400 | 1.89282200  | 1.67579900  |
| H                                                                                                | -6.93766700 | -0.88612700 | -4.23877500 | H                                                                                                | -8.03983400 | 0.16285700  | 0.39414100  |
| 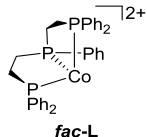 <p>fac-L</p> |             |             |             |  <p>mer-L</p> |             |             |             |
| C                                                                                                | -0.17673400 | 2.06941100  | 2.08119900  | P                                                                                                | 2.24841500  | -0.23614300 | -0.02259200 |
| H                                                                                                | -0.91207600 | 2.57196300  | 1.44978400  | P                                                                                                | -2.20525400 | 0.63004000  | -0.10669700 |
| H                                                                                                | -0.25212400 | 2.50510700  | 3.07967400  | C                                                                                                | 2.50052900  | -1.29527900 | -1.53423900 |
| C                                                                                                | 1.23512000  | 2.22420600  | 1.52263600  | C                                                                                                | -2.73175800 | 0.02932300  | -1.78563100 |
| H                                                                                                | 1.97399000  | 1.87278000  | 2.24650400  | H                                                                                                | 2.40362900  | -2.34418400 | -1.24669400 |
| H                                                                                                | 1.46403200  | 3.26937200  | 1.30104700  | H                                                                                                | -3.22114800 | -0.93188600 | -1.60912300 |
| C                                                                                                | 1.23512000  | 2.22420600  | -1.52263600 | H                                                                                                | 3.51018300  | -1.15029900 | -1.92185400 |
| H                                                                                                | 1.46403200  | 3.26937200  | -1.30104700 | H                                                                                                | -3.48406900 | 0.69186600  | -2.21833100 |
| H                                                                                                | 1.97399000  | 1.87278000  | -2.24650400 | C                                                                                                | 1.44731900  | -0.92406900 | -2.57856400 |
| C                                                                                                | -0.17673400 | 2.06941100  | -2.08119900 | C                                                                                                | -1.52090400 | -0.14388300 | -2.70451500 |
| H                                                                                                | -0.25212400 | 2.50510700  | -3.07967400 | H                                                                                                | 1.46493700  | -1.60666000 | -3.43116500 |
| H                                                                                                | -0.91207600 | 2.57196300  | -1.44978400 | H                                                                                                | -1.77488500 | -0.72032000 | -3.59694300 |
| C                                                                                                | -2.35625900 | 0.08082700  | 2.58020200  | H                                                                                                | 1.59788900  | 0.09294300  | -2.95127600 |
| C                                                                                                | -3.31135300 | 1.02822000  | 2.19664300  | H                                                                                                | -1.11949200 | 0.81790500  | -3.03397900 |
| H                                                                                                | -3.02667200 | 1.92893800  | 1.66556700  | Co                                                                                               | -0.01809300 | 0.05904400  | 0.16309800  |
| C                                                                                                | -4.64437800 | 0.83724800  | 2.52691700  | C                                                                                                | 3.10869600  | -1.00720400 | 1.38462000  |
| H                                                                                                | -5.37916500 | 1.58459000  | 2.25170900  | C                                                                                                | 3.73654700  | -0.19368200 | 2.33280500  |

|    |             |             |             |   |             |             |             |
|----|-------------|-------------|-------------|---|-------------|-------------|-------------|
| C  | -5.03709700 | -0.30501300 | 3.21603900  | C | 3.07105500  | -2.39275200 | 1.57363000  |
| H  | -6.07988000 | -0.44946900 | 3.47310300  | C | 4.34258100  | -0.76668500 | 3.44166400  |
| C  | -4.09346800 | -1.25777500 | 3.58269100  | H | 3.77447400  | 0.88091800  | 2.19711900  |
| H  | -4.39821700 | -2.14494500 | 4.12504900  | C | 3.68455600  | -2.95584700 | 2.68275200  |
| C  | -2.75678000 | -1.07238900 | 3.26496000  | H | 2.58513300  | -3.04486500 | 0.85643400  |
| H  | -2.02609700 | -1.81118100 | 3.57410000  | C | 4.31855600  | -2.14475700 | 3.61746500  |
| C  | 3.25326800  | 0.69177000  | 0.00000000  | H | 4.84016600  | -0.13430700 | 4.16738900  |
| C  | 4.24538400  | 1.67820900  | 0.00000000  | H | 3.67202000  | -4.03115300 | 2.81621100  |
| H  | 3.98940800  | 2.73253200  | 0.00000000  | H | 4.79859700  | -2.58889400 | 4.48151400  |
| C  | 5.58174600  | 1.30737700  | 0.00000000  | C | 3.07803500  | 1.34223600  | -0.40090700 |
| H  | 6.35026700  | 2.07129800  | 0.00000000  | C | 2.34905100  | 2.53199300  | -0.41470100 |
| C  | 5.93373700  | -0.03808700 | 0.00000000  | C | 4.44432400  | 1.36179700  | -0.70038000 |
| H  | 6.97961400  | -0.32173300 | 0.00000000  | C | 2.97641300  | 3.73047200  | -0.73133800 |
| C  | 4.95013400  | -1.01843700 | 0.00000000  | H | 1.28919800  | 2.53871500  | -0.17359400 |
| H  | 5.22685800  | -2.06608800 | 0.00000000  | C | 5.06480900  | 2.56118800  | -1.01355200 |
| C  | 3.61002800  | -0.65631000 | 0.00000000  | H | 5.03044800  | 0.44938500  | -0.67446200 |
| H  | 2.84877400  | -1.42922900 | 0.00000000  | C | 4.33175000  | 3.74401200  | -1.03129800 |
| C  | -2.35625900 | 0.08082700  | -2.58020200 | H | 2.40812900  | 4.65276100  | -0.73945200 |
| C  | -3.31135300 | 1.02822000  | -2.19664300 | H | 6.12397600  | 2.57478500  | -1.24222600 |
| H  | -3.02667200 | 1.92893800  | -1.66556700 | H | 4.82228900  | 4.67884600  | -1.27609300 |
| C  | -4.64437800 | 0.83724800  | -2.52691700 | C | -1.98974800 | 2.43973800  | -0.16506900 |
| H  | -5.37916500 | 1.58459000  | -2.25170900 | C | -1.52974400 | 3.05774500  | 1.00778700  |
| C  | -5.03709700 | -0.30501300 | -3.21603900 | C | -2.21349600 | 3.21006300  | -1.30804700 |
| H  | -6.07988000 | -0.44946900 | -3.47310300 | C | -1.32255300 | 4.42903700  | 1.03689600  |
| C  | -4.09346800 | -1.25777500 | -3.58269100 | H | -1.38815200 | 2.47937400  | 1.91689900  |
| H  | -4.39821700 | -2.14494500 | -4.12504900 | C | -2.00014200 | 4.58199000  | -1.27097200 |
| C  | -2.75678000 | -1.07238900 | -3.26496000 | H | -2.58134500 | 2.76098000  | -2.22307500 |
| H  | -2.02609700 | -1.81118100 | -3.57410000 | C | -1.55475400 | 5.19075900  | -0.10330300 |
| Co | -0.02771100 | -0.40998200 | 0.00000000  | H | -0.99035100 | 4.90476800  | 1.95217300  |
| P  | -0.60315500 | 0.26533900  | 2.13454400  | H | -2.19419400 | 5.17889400  | -2.15443700 |
| P  | 1.50513300  | 1.18429700  | 0.00000000  | H | -1.40237700 | 6.26346000  | -0.07760700 |
| P  | -0.60315500 | 0.26533900  | -2.13454400 | C | -3.52548500 | 0.25209800  | 1.08193400  |
| C  | 0.39221900  | -0.47734700 | -3.46338900 | C | -3.56099900 | -1.01353900 | 1.67456400  |
| C  | 0.33653700  | 0.03952800  | -4.76177800 | C | -4.51851700 | 1.19108500  | 1.37201900  |
| C  | 1.19749300  | -1.58449400 | -3.19164800 | C | -4.59158800 | -1.33908500 | 2.54379400  |
| C  | 1.09196200  | -0.54365400 | -5.76745200 | H | -2.79347700 | -1.74891600 | 1.45642400  |
| H  | -0.30381400 | 0.88260300  | -4.99750900 | C | -5.54409800 | 0.85536500  | 2.24405200  |
| C  | 1.94711400  | -2.16795200 | -4.20440300 | H | -4.49638000 | 2.17706100  | 0.92296600  |
| H  | 1.23525000  | -2.00525200 | -2.19108700 | C | -5.58083300 | -0.40502700 | 2.82925300  |
| C  | 1.89612500  | -1.64497800 | -5.48967200 | H | -4.62098200 | -2.31976800 | 3.00362000  |
| H  | 1.04822200  | -0.14297500 | -6.77333900 | H | -6.31680800 | 1.58138600  | 2.46761900  |
| H  | 2.56611600  | -3.03152500 | -3.99214900 | H | -6.38295000 | -0.65982200 | 3.51194600  |
| H  | 2.47999500  | -2.09954000 | -6.28145100 | P | -0.19462300 | -0.98569900 | -1.73371500 |
| C  | 0.39221900  | -0.47734700 | 3.46338900  | C | -0.65101600 | -2.73327700 | -1.52699700 |
| C  | 0.33653700  | 0.03952800  | 4.76177800  | C | -0.97394400 | -3.50629200 | -2.64693200 |
| C  | 1.19749300  | -1.58449400 | 3.19164800  | C | -0.64903500 | -3.31591700 | -0.25797300 |
| C  | 1.09196200  | -0.54365400 | 5.76745200  | C | -1.29481000 | -4.84663500 | -2.48919100 |
| H  | -0.30381400 | 0.88260300  | 4.99750900  | H | -0.97640800 | -3.07768200 | -3.64372200 |
| C  | 1.94711400  | -2.16795200 | 4.20440300  | C | -0.96887200 | -4.65858700 | -0.10812300 |
| H  | 1.23525000  | -2.00525200 | 2.19108700  | H | -0.39213600 | -2.72865500 | 0.61934300  |
| C  | 1.89612500  | -1.64497800 | 5.48967200  | C | -1.29318300 | -5.42164600 | -1.22286300 |
| H  | 1.04822200  | -0.14297500 | 6.77333900  | H | -1.54653800 | -5.44399500 | -3.35754000 |
| H  | 2.56611600  | -3.03152500 | 3.99214900  | H | -0.96619400 | -5.10909100 | 0.87743300  |



|                                                                                                 |             |             |             |                                                                                                 |             |             |             |
|-------------------------------------------------------------------------------------------------|-------------|-------------|-------------|-------------------------------------------------------------------------------------------------|-------------|-------------|-------------|
| H                                                                                               | 2.47999500  | -2.09954000 | 6.28145100  | H                                                                                               | -1.54521500 | -6.46911800 | -1.10594400 |
| 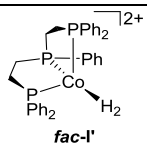 <p>fac-1'</p> |             |             |             |  <p>mer-1'</p> |             |             |             |
| C                                                                                               | -1.98229000 | 0.49349300  | 2.09911000  | P                                                                                               | 2.28223200  | 0.13667000  | -0.04170600 |
| H                                                                                               | -1.28196400 | 1.21210000  | 2.53203600  | P                                                                                               | -2.25210000 | 0.27120800  | -0.06844800 |
| H                                                                                               | -2.95751600 | 0.70601900  | 2.54272400  | C                                                                                               | 2.69375200  | -0.74047100 | -1.63281400 |
| C                                                                                               | -1.54918200 | -0.94407100 | 2.34971100  | C                                                                                               | -2.68188200 | -0.44569100 | -1.73222000 |
| H                                                                                               | -2.35291500 | -1.64374800 | 2.11212800  | H                                                                                               | 2.80232400  | -1.80610600 | -1.42145900 |
| H                                                                                               | -1.27434000 | -1.10834200 | 3.39425400  | H                                                                                               | -2.93980400 | -1.49036200 | -1.54217700 |
| C                                                                                               | 1.45217000  | -1.37949700 | 2.24312900  | H                                                                                               | 3.65291100  | -0.37878800 | -2.00682900 |
| H                                                                                               | 1.24422500  | -1.58653900 | 3.29493200  | H                                                                                               | -3.57694600 | 0.03530800  | -2.13187500 |
| H                                                                                               | 2.08477200  | -2.18418400 | 1.86240600  | C                                                                                               | 1.57120500  | -0.50164400 | -2.63909300 |
| C                                                                                               | 2.15221300  | -0.03830900 | 2.06304200  | C                                                                                               | -1.49836700 | -0.34946900 | -2.69329900 |
| H                                                                                               | 3.16543900  | -0.06175500 | 2.47035400  | H                                                                                               | 1.68749100  | -1.12505300 | -3.52826100 |
| H                                                                                               | 1.60773900  | 0.76287300  | 2.56761700  | H                                                                                               | -1.65063300 | -0.96887900 | -3.57981900 |
| C                                                                                               | -2.32994800 | 2.62932000  | 0.08297900  | H                                                                                               | 1.53408300  | 0.54366000  | -2.95729800 |
| C                                                                                               | -3.58018200 | 3.09570900  | -0.32708900 | H                                                                                               | -1.32205300 | 0.67603600  | -3.02684400 |
| H                                                                                               | -4.37800000 | 2.40237800  | -0.56401400 | Co                                                                                              | 0.00502200  | 0.05691900  | 0.22846100  |
| C                                                                                               | -3.80291400 | 4.46236400  | -0.42917200 | C                                                                                               | 3.34234500  | -0.54628700 | 1.27157800  |
| H                                                                                               | -4.77470800 | 4.82420700  | -0.74357300 | C                                                                                               | 3.88581500  | 0.30621400  | 2.23611000  |
| C                                                                                               | -2.78685600 | 5.36136300  | -0.13169400 | C                                                                                               | 3.55083100  | -1.92578400 | 1.36422400  |
| H                                                                                               | -2.96656800 | 6.42682500  | -0.21441600 | C                                                                                               | 4.64920500  | -0.21911800 | 3.26916700  |
| C                                                                                               | -1.53771500 | 4.89776900  | 0.26768100  | H                                                                                               | 3.73418400  | 1.37763300  | 2.17394300  |
| H                                                                                               | -0.74423500 | 5.60010400  | 0.49360200  | C                                                                                               | 4.31919400  | -2.44015600 | 2.39852000  |
| C                                                                                               | -1.30432900 | 3.53524700  | 0.37044100  | H                                                                                               | 3.13257800  | -2.60798500 | 0.63235300  |
| H                                                                                               | -0.32145600 | 3.18575100  | 0.67176600  | C                                                                                               | 4.86750900  | -1.58898100 | 3.35089300  |
| C                                                                                               | -3.41295500 | -0.06556900 | -0.44660800 | H                                                                                               | 5.08027300  | 0.44550100  | 4.00855300  |
| C                                                                                               | -4.51004400 | -0.46863200 | 0.31776000  | H                                                                                               | 4.49379200  | -3.50790400 | 2.45891900  |
| H                                                                                               | -4.55871800 | -0.26205600 | 1.38041900  | H                                                                                               | 5.46960800  | -1.99402700 | 4.15568400  |
| C                                                                                               | -5.57194100 | -1.12808400 | -0.28741300 | C                                                                                               | 2.74818300  | 1.87597500  | -0.32328000 |
| H                                                                                               | -6.42281300 | -1.43469900 | 0.30955200  | C                                                                                               | 1.79090100  | 2.88550500  | -0.21242200 |
| C                                                                                               | -5.54930300 | -1.38373800 | -1.65297100 | C                                                                                               | 4.06054900  | 2.20128300  | -0.68169500 |
| H                                                                                               | -6.38339000 | -1.89282500 | -2.12157200 | C                                                                                               | 2.13714400  | 4.20717200  | -0.46278900 |
| C                                                                                               | -4.46264500 | -0.97950900 | -2.42039700 | H                                                                                               | 0.76849400  | 2.65581700  | 0.07666000  |
| H                                                                                               | -4.44881300 | -1.16879300 | -3.48732000 | C                                                                                               | 4.40127600  | 3.52292600  | -0.92498000 |
| C                                                                                               | -3.39447000 | -0.32820100 | -1.82092000 | H                                                                                               | 4.82292900  | 1.43307300  | -0.75456500 |
| H                                                                                               | -2.56083000 | -0.00337400 | -2.43612900 | C                                                                                               | 3.44100200  | 4.52446000  | -0.81860600 |
| C                                                                                               | -0.39068200 | -3.15675100 | 0.74252200  | H                                                                                               | 1.39097200  | 4.98760900  | -0.37432400 |
| C                                                                                               | 0.23066900  | -4.22582700 | 1.39331200  | H                                                                                               | 5.42006700  | 3.77372600  | -1.19606500 |
| H                                                                                               | 0.90964900  | -4.06380700 | 2.22168100  | H                                                                                               | 3.71379400  | 5.55572000  | -1.00975700 |
| C                                                                                               | -0.03702800 | -5.52668200 | 0.99053800  | C                                                                                               | -2.54443600 | 2.07389800  | -0.15374200 |
| H                                                                                               | 0.43847400  | -6.35429700 | 1.50346800  | C                                                                                               | -2.45191000 | 2.80869300  | 1.03490000  |
| C                                                                                               | -0.91138500 | -5.76770100 | -0.06233000 | C                                                                                               | -2.85192100 | 2.73220900  | -1.34624500 |
| H                                                                                               | -1.11371700 | -6.78570000 | -0.37398600 | C                                                                                               | -2.68094700 | 4.17564000  | 1.02810300  |
| C                                                                                               | -1.53023800 | -4.70662300 | -0.71301600 | H                                                                                               | -2.24793900 | 2.31155500  | 1.97822000  |
| H                                                                                               | -2.21368100 | -4.89506700 | -1.53240000 | C                                                                                               | -3.07336300 | 4.10389300  | -1.34643000 |
| C                                                                                               | -1.27348900 | -3.40328200 | -0.31459000 | H                                                                                               | -2.94929900 | 2.18962400  | -2.27873800 |
| H                                                                                               | -1.77528100 | -2.58475700 | -0.82126100 | C                                                                                               | -2.98709000 | 4.82558900  | -0.16337000 |
| C                                                                                               | 3.36744200  | -0.81636900 | -0.51527300 | H                                                                                               | -2.62985100 | 4.73425500  | 1.95535300  |
| C                                                                                               | 2.89446700  | -1.79114700 | -1.39551100 | H                                                                                               | -3.32584600 | 4.60580400  | -2.27307500 |

|    |             |             |             |   |             |             |             |
|----|-------------|-------------|-------------|---|-------------|-------------|-------------|
| H  | 1.83705500  | -1.85032100 | -1.63987200 | H | -3.17128200 | 5.89353600  | -0.16587700 |
| C  | 3.77585000  | -2.69669400 | -1.97087700 | C | -3.41817600 | -0.41656900 | 1.14387500  |
| H  | 3.40741600  | -3.44950000 | -2.65752300 | C | -2.99983700 | -1.42446500 | 2.01384500  |
| C  | 5.13008500  | -2.62746200 | -1.67112600 | C | -4.74360200 | 0.02686900  | 1.17115100  |
| H  | 5.81980400  | -3.32994800 | -2.12424400 | C | -3.90171700 | -1.98801300 | 2.90585600  |
| C  | 5.60711800  | -1.65449400 | -0.79780000 | H | -1.97155000 | -1.77084700 | 2.00407600  |
| H  | 6.66548300  | -1.59938700 | -0.57176900 | C | -5.63859800 | -0.54344400 | 2.06382000  |
| C  | 4.73288900  | -0.74665900 | -0.22026100 | H | -5.07605300 | 0.82106300  | 0.51199400  |
| H  | 5.11773000  | 0.01969100  | 0.44387000  | C | -5.21949200 | -1.54897300 | 2.92859300  |
| C  | 2.87814600  | 2.02885100  | 0.05034100  | H | -3.57593400 | -2.76625500 | 3.58576000  |
| C  | 2.86566900  | 2.96009100  | 1.09210200  | H | -6.66582900 | -0.19932000 | 2.08759700  |
| H  | 2.48950000  | 2.70267800  | 2.07497300  | H | -5.92264100 | -1.98760300 | 3.62687000  |
| C  | 3.37657600  | 4.23506900  | 0.88583000  | P | -0.00358500 | -0.89705200 | -1.76006600 |
| H  | 3.38581200  | 4.94730100  | 1.70257100  | C | -0.08767400 | -2.70872500 | -1.60450000 |
| C  | 3.88238100  | 4.59273500  | -0.35729000 | C | -0.19817600 | -3.50289400 | -2.75004900 |
| H  | 4.28245300  | 5.58772700  | -0.51315200 | C | -0.02786600 | -3.31146700 | -0.34681800 |
| C  | 3.88710000  | 3.67123000  | -1.39938800 | C | -0.25267900 | -4.88353100 | -2.62974000 |
| H  | 4.29050000  | 3.94589200  | -2.36686700 | H | -0.24211100 | -3.05660000 | -3.73812200 |
| C  | 3.38537300  | 2.39444800  | -1.20136700 | C | -0.08099400 | -4.69412100 | -0.23261900 |
| H  | 3.41746300  | 1.67728300  | -2.01506200 | H | 0.06464100  | -2.70770400 | 0.55194400  |
| Co | 0.02853300  | 0.01838500  | -0.43584100 | C | -0.19513400 | -5.47827700 | -1.37353800 |
| P  | -2.01253300 | 0.84740200  | 0.27996500  | H | -0.34003400 | -5.49734600 | -3.51845200 |
| P  | -0.11864800 | -1.43357300 | 1.25407200  | H | -0.03588200 | -5.15941700 | 0.74493900  |
| P  | 2.20292100  | 0.35160000  | 0.25172800  | H | -0.23910400 | -6.55747300 | -1.28532600 |
| H  | 0.55641100  | 0.99457600  | -1.67218200 | H | -0.39590900 | 0.61803100  | 1.73089800  |
| H  | -0.24078800 | 1.15156400  | -1.62221700 | H | 0.42648200  | 0.65104100  | 1.71565300  |

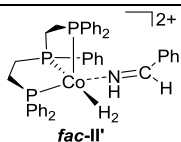

|   |             |             |             |
|---|-------------|-------------|-------------|
| C | -2.39754700 | 1.51308100  | -1.81366500 |
| H | -2.70080700 | 0.54499400  | -2.21723000 |
| H | -3.21705300 | 2.21276700  | -1.98803100 |
| C | -1.10891900 | 2.00449000  | -2.45716300 |
| H | -0.92987600 | 3.05225400  | -2.20613500 |
| H | -1.13816800 | 1.93253100  | -3.54679000 |
| C | 0.64603100  | -0.37685300 | -2.94461700 |
| H | 0.52776200  | -0.04806100 | -3.98045400 |
| H | 1.69268300  | -0.65454900 | -2.80647700 |
| C | -0.26354900 | -1.55837900 | -2.63001800 |
| H | 0.06037600  | -2.44332600 | -3.18150400 |
| H | -1.29273800 | -1.35836600 | -2.93580600 |
| C | -3.64684400 | 0.66865700  | 0.73555800  |
| C | -4.69176400 | 0.17127300  | -0.04380300 |
| H | -4.61385900 | 0.11946300  | -1.12269100 |
| C | -5.86650000 | -0.25569300 | 0.56301700  |
| H | -6.68014200 | -0.62718400 | -0.04876300 |
| C | -6.00016100 | -0.20189300 | 1.94375500  |
| H | -6.92035400 | -0.53041900 | 2.41262100  |
| C | -4.95721300 | 0.28458700  | 2.72526400  |

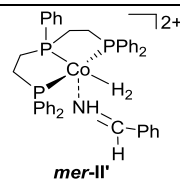

|   |             |             |             |
|---|-------------|-------------|-------------|
| C | 2.37655400  | 1.68230000  | -1.93363000 |
| H | 2.43883300  | 2.66299600  | -2.40679100 |
| H | 3.38784900  | 1.38357800  | -1.65124700 |
| C | 1.76941700  | 0.64341400  | -2.87469100 |
| H | 2.47078000  | 0.35879600  | -3.66183200 |
| H | 0.86243500  | 1.01688900  | -3.35686500 |
| C | 0.34406000  | -2.07288500 | -2.74752100 |
| H | -0.47487200 | -1.57390500 | -3.27257900 |
| H | 0.96424400  | -2.56955900 | -3.49683900 |
| C | -0.16720000 | -3.05713900 | -1.69852100 |
| H | 0.65931200  | -3.65537800 | -1.30871200 |
| H | -0.90197400 | -3.74921300 | -2.11245700 |
| C | 0.60468500  | 3.46781800  | -0.39867600 |
| C | -0.01175600 | 3.90233200  | -1.57464800 |
| H | -0.01597400 | 3.28115000  | -2.46341500 |
| C | -0.61433200 | 5.15074800  | -1.62451100 |
| H | -1.07643800 | 5.48975700  | -2.54433100 |
| C | -0.61678300 | 5.96907200  | -0.50060400 |
| H | -1.08218700 | 6.94673700  | -0.54370000 |
| C | -0.01190000 | 5.53804800  | 0.67282300  |

|    |             |             |             |    |             |             |             |
|----|-------------|-------------|-------------|----|-------------|-------------|-------------|
| H  | -5.06286100 | 0.33740400  | 3.80252300  | H  | -0.00047600 | 6.17957600  | 1.54625700  |
| C  | -3.78563700 | 0.72061000  | 2.12593600  | C  | 0.59672700  | 4.29089300  | 0.72908500  |
| H  | -2.99340200 | 1.12918200  | 2.74506300  | H  | 1.08625100  | 3.97524600  | 1.64293200  |
| C  | -1.93788800 | 2.99942800  | 0.67281800  | C  | 2.88432000  | -1.61542700 | -1.37631700 |
| C  | -2.91601900 | 3.96156600  | 0.40637800  | C  | 3.73361800  | -2.06803200 | -2.39237700 |
| H  | -3.77690100 | 3.72143200  | -0.20817300 | H  | 3.47557900  | -1.93595700 | -3.43819600 |
| C  | -2.80564700 | 5.23240900  | 0.95031200  | C  | 4.92534500  | -2.69784100 | -2.06833200 |
| H  | -3.56673500 | 5.97467300  | 0.73994800  | H  | 5.58114300  | -3.04711400 | -2.85713600 |
| C  | -1.73053600 | 5.55064100  | 1.77434100  | C  | 5.27688700  | -2.88151500 | -0.73472200 |
| H  | -1.65450000 | 6.54244900  | 2.20447600  | H  | 6.20905800  | -3.37507800 | -0.48593300 |
| C  | -0.76259300 | 4.59596900  | 2.05478200  | C  | 4.43707900  | -2.43486000 | 0.27621900  |
| H  | 0.06719100  | 4.83746900  | 2.70889900  | H  | 4.71168800  | -2.57805800 | 1.31444800  |
| C  | -0.86518900 | 3.32385600  | 1.50395400  | C  | 3.24236400  | -1.80168300 | -0.04176500 |
| H  | -0.10824100 | 2.58051900  | 1.73899000  | H  | 2.59377000  | -1.45297300 | 0.75351600  |
| C  | 1.78739400  | 2.17425300  | -2.00564000 | C  | -2.70539900 | -2.25923000 | -0.41238300 |
| C  | 2.80139600  | 1.94127300  | -2.93874400 | C  | -3.30251800 | -2.39543200 | -1.66668600 |
| H  | 2.78519400  | 1.07004500  | -3.58134000 | H  | -2.70430800 | -2.46387100 | -2.56841600 |
| C  | 3.84332500  | 2.85024200  | -3.07386600 | C  | -4.68459300 | -2.48043100 | -1.77506400 |
| H  | 4.61858700  | 2.66930000  | -3.80912700 | H  | -5.14066400 | -2.60922800 | -2.74990300 |
| C  | 3.88648600  | 3.98913100  | -2.28045200 | C  | -5.47787000 | -2.42119900 | -0.63600100 |
| H  | 4.69809300  | 4.69818200  | -2.39467000 | H  | -6.55522500 | -2.50196800 | -0.72156300 |
| C  | 2.88410200  | 4.22377400  | -1.34574900 | C  | -4.88794800 | -2.27484700 | 0.61391500  |
| H  | 2.91233700  | 5.11454700  | -0.72927500 | H  | -5.50327900 | -2.23959700 | 1.50523200  |
| C  | 1.83956800  | 3.32197400  | -1.20549100 | C  | -3.50787800 | -2.18939800 | 0.72841200  |
| H  | 1.05941400  | 3.52401400  | -0.47854800 | H  | -3.05913700 | -2.10283900 | 1.71193600  |
| C  | 1.07468000  | -3.05556900 | -0.46335400 | P  | 1.40630400  | 1.82276400  | -0.33162900 |
| C  | 1.03667700  | -3.81006000 | 0.71307900  | P  | 1.31593700  | -0.80201200 | -1.82155900 |
| H  | 0.17578500  | -3.75563200 | 1.37200000  | P  | -0.88708100 | -2.16045500 | -0.22020600 |
| C  | 2.07313300  | -4.67900000 | 1.02316500  | C  | -0.50247200 | -3.21077900 | 1.22339200  |
| H  | 2.02127000  | -5.27624200 | 1.92632000  | C  | -0.86876900 | -4.56038400 | 1.21899700  |
| C  | 3.16238000  | -4.80133600 | 0.16762900  | C  | 0.15131200  | -2.67882600 | 2.33367900  |
| H  | 3.96619300  | -5.48816100 | 0.40505400  | C  | -0.57136700 | -5.36135500 | 2.31083300  |
| C  | 3.20725400  | -4.05501300 | -1.00144400 | H  | -1.39738100 | -4.98815500 | 0.37423400  |
| H  | 4.04550300  | -4.15853400 | -1.68070900 | C  | 0.44118000  | -3.48388500 | 3.42836700  |
| C  | 2.17101100  | -3.18298800 | -1.31515200 | H  | 0.43372300  | -1.63172500 | 2.35402700  |
| H  | 2.22522800  | -2.63223300 | -2.24635700 | C  | 0.08254000  | -4.82465900 | 3.41535400  |
| C  | -1.78718600 | -3.02279200 | -0.62319700 | H  | -0.85705700 | -6.40667400 | 2.30351200  |
| C  | -1.94063300 | -4.11434100 | -1.48506700 | H  | 0.94324500  | -3.06376200 | 4.29197500  |
| H  | -1.22435900 | -4.30095700 | -2.27730000 | H  | 0.30711400  | -5.45381500 | 4.26866400  |
| C  | -3.00385000 | -4.98739200 | -1.31945000 | C  | 2.66001300  | 1.95476100  | 0.99206700  |
| H  | -3.11825200 | -5.82949600 | -1.99194700 | C  | 3.81470200  | 2.71840600  | 0.79687300  |
| C  | -3.91146000 | -4.79316300 | -0.28278800 | C  | 2.45057500  | 1.33294800  | 2.22317700  |
| H  | -4.73545400 | -5.48434800 | -0.14910500 | C  | 4.74519400  | 2.84462600  | 1.81764900  |
| C  | -3.75760600 | -3.72000300 | 0.58285000  | H  | 3.99054600  | 3.23099100  | -0.14233100 |
| H  | -4.45958600 | -3.56971200 | 1.39428300  | C  | 3.38178800  | 1.46768400  | 3.24536300  |
| C  | -2.70032200 | -2.83299300 | 0.41223900  | H  | 1.55418800  | 0.74782100  | 2.39894000  |
| H  | -2.60091600 | -1.99086500 | 1.08714100  | C  | 4.53062300  | 2.21995700  | 3.04150100  |
| Co | -0.08704700 | 0.23005600  | 0.21932000  | H  | 5.63733000  | 3.43920100  | 1.65974500  |
| P  | -2.09841700 | 1.30098200  | 0.00092100  | H  | 3.20878300  | 0.98762800  | 4.20149200  |
| P  | 0.35493700  | 1.05783000  | -1.81262400 | H  | 5.25806700  | 2.32553800  | 3.83779800  |
| P  | -0.33502600 | -1.92297900 | -0.80475000 | Co | 0.03515200  | -0.03451900 | -0.18693100 |
| H  | -0.50660600 | -0.72110800 | 1.49869800  | H  | -0.48045700 | 0.73225000  | 1.19086600  |
| H  | -0.53407600 | 0.03440500  | 1.80727000  | H  | -1.38902100 | 0.43964800  | -2.35440300 |

|                                                                                                          |             |             |             |                                                                                                          |             |             |             |
|----------------------------------------------------------------------------------------------------------|-------------|-------------|-------------|----------------------------------------------------------------------------------------------------------|-------------|-------------|-------------|
| H                                                                                                        | 2.43552800  | 0.85163900  | 0.20295000  | C                                                                                                        | -2.72031500 | 1.24908900  | -1.31543200 |
| C                                                                                                        | 2.46239500  | -0.46822900 | 1.61083600  | H                                                                                                        | -3.34736200 | 1.21940400  | -2.21015900 |
| H                                                                                                        | 1.88022800  | -1.19724800 | 2.17208200  | C                                                                                                        | -3.38015300 | 1.84246900  | -0.16687600 |
| C                                                                                                        | 3.85589600  | -0.36607400 | 1.98424600  | C                                                                                                        | -4.78259500 | 1.85424500  | -0.18211300 |
| C                                                                                                        | 4.30270000  | -1.17581100 | 3.03861000  | C                                                                                                        | -2.70801800 | 2.42818700  | 0.91296600  |
| C                                                                                                        | 4.76296500  | 0.50045700  | 1.35384800  | C                                                                                                        | -5.49453300 | 2.38487200  | 0.88065300  |
| C                                                                                                        | 5.62146100  | -1.12056400 | 3.45740900  | H                                                                                                        | -5.31386300 | 1.43532000  | -1.03025800 |
| H                                                                                                        | 3.60768800  | -1.84881600 | 3.52958500  | C                                                                                                        | -3.42266800 | 2.97708400  | 1.96289500  |
| C                                                                                                        | 6.07742900  | 0.55078500  | 1.77349300  | H                                                                                                        | -1.63074200 | 2.52089400  | 0.89032300  |
| H                                                                                                        | 4.45037200  | 1.13892200  | 0.53392300  | C                                                                                                        | -4.81490500 | 2.94291400  | 1.95664200  |
| C                                                                                                        | 6.50823500  | -0.25815600 | 2.82536900  | H                                                                                                        | -6.57775300 | 2.38018600  | 0.86377500  |
| H                                                                                                        | 5.95904500  | -1.74662800 | 4.27435000  | H                                                                                                        | -2.89919100 | 3.45196100  | 2.78435800  |
| H                                                                                                        | 6.77674500  | 1.21966300  | 1.28645200  | H                                                                                                        | -5.36956100 | 3.37459800  | 2.78176200  |
| H                                                                                                        | 7.54128400  | -0.21204700 | 3.15016100  | N                                                                                                        | -1.53367800 | 0.75094400  | -1.39830800 |
| N                                                                                                        | 1.83592900  | 0.19516500  | 0.69963000  | H                                                                                                        | -0.90785300 | 0.03731000  | 1.17754100  |
| 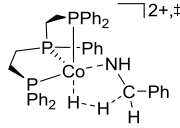 <p><i>fac-TS1'</i></p> |             |             |             |  <p><i>mer-TS1'</i></p> |             |             |             |
| C                                                                                                        | 2.20174200  | -1.68489500 | -2.07331500 | C                                                                                                        | 1.43999500  | -2.34980900 | -1.84641400 |
| H                                                                                                        | 2.19466600  | -0.94951100 | -2.88177800 | H                                                                                                        | 2.41508800  | -2.62624600 | -2.24852500 |
| H                                                                                                        | 3.11794400  | -2.26922100 | -2.18914700 | H                                                                                                        | 0.93997500  | -3.26532200 | -1.52373500 |
| C                                                                                                        | 0.96420600  | -2.56304700 | -2.11419200 | C                                                                                                        | 0.58688900  | -1.62808900 | -2.88969900 |
| H                                                                                                        | 1.05969000  | -3.43671800 | -1.46673600 | H                                                                                                        | 0.27342300  | -2.30645400 | -3.68636500 |
| H                                                                                                        | 0.77325200  | -2.94004400 | -3.12237400 | H                                                                                                        | 1.10894900  | -0.78070300 | -3.33958500 |
| C                                                                                                        | -1.17416100 | -0.62683200 | -2.92692700 | C                                                                                                        | -2.02466600 | 0.06163200  | -2.91261000 |
| H                                                                                                        | -0.80465200 | -1.02174700 | -3.87570100 | H                                                                                                        | -1.45935800 | 0.87711800  | -3.36871400 |
| H                                                                                                        | -2.25982100 | -0.74187000 | -2.92418700 | H                                                                                                        | -2.50829400 | -0.50112400 | -3.71342800 |
| C                                                                                                        | -0.80266600 | 0.84098600  | -2.76206600 | C                                                                                                        | -3.04423100 | 0.55397400  | -1.88645700 |
| H                                                                                                        | -1.40887500 | 1.46928900  | -3.41849200 | H                                                                                                        | -3.73435400 | -0.25190200 | -1.63027000 |
| H                                                                                                        | 0.24927400  | 1.02304600  | -2.99590500 | H                                                                                                        | -3.63682300 | 1.38616900  | -2.26790200 |
| C                                                                                                        | 3.51684100  | 0.63592400  | -0.91137100 | C                                                                                                        | 3.41692200  | -0.72582800 | -0.45102100 |
| C                                                                                                        | 4.82702600  | 0.26230400  | -1.23399000 | C                                                                                                        | 3.96924300  | -0.45592400 | -1.70598700 |
| H                                                                                                        | 5.13219600  | -0.77751500 | -1.19333500 | H                                                                                                        | 3.36529900  | -0.49690300 | -2.60489200 |
| C                                                                                                        | 5.75511600  | 1.22814800  | -1.59001900 | C                                                                                                        | 5.31734100  | -0.15201500 | -1.81968200 |
| H                                                                                                        | 6.76808100  | 0.93353400  | -1.83773200 | H                                                                                                        | 5.74602800  | 0.03190500  | -2.79795300 |
| C                                                                                                        | 5.38999900  | 2.57000000  | -1.62169300 | C                                                                                                        | 6.11636900  | -0.09436900 | -0.68381500 |
| H                                                                                                        | 6.12017700  | 3.32274800  | -1.89487400 | H                                                                                                        | 7.17269600  | 0.12978700  | -0.77591800 |
| C                                                                                                        | 4.09437400  | 2.94579000  | -1.29607900 | C                                                                                                        | 5.56241800  | -0.32946100 | 0.56815300  |
| H                                                                                                        | 3.80983700  | 3.99100800  | -1.31098600 | H                                                                                                        | 6.18371100  | -0.28660400 | 1.45489000  |
| C                                                                                                        | 3.15764100  | 1.98163800  | -0.94292700 | C                                                                                                        | 4.21592900  | -0.64132100 | 0.69041200  |
| H                                                                                                        | 2.15125200  | 2.30103900  | -0.69103200 | H                                                                                                        | 3.80435100  | -0.85390500 | 1.66964100  |
| C                                                                                                        | 3.15823400  | -1.70199800 | 0.75987200  | C                                                                                                        | -1.81637100 | -2.45959000 | -1.46479300 |
| C                                                                                                        | 3.80241300  | -1.04895600 | 1.81700300  | C                                                                                                        | -2.44618300 | -3.20908200 | -2.46585300 |
| H                                                                                                        | 3.85702000  | 0.03426000  | 1.84079200  | H                                                                                                        | -2.38489100 | -2.91606600 | -3.50896400 |
| C                                                                                                        | 4.42340100  | -1.78582300 | 2.81542400  | C                                                                                                        | -3.15879700 | -4.34997700 | -2.13030700 |
| H                                                                                                        | 4.93513100  | -1.27321200 | 3.62158800  | H                                                                                                        | -3.64529700 | -4.92790300 | -2.90725300 |
| C                                                                                                        | 4.40185100  | -3.17540500 | 2.77517900  | C                                                                                                        | -3.24697100 | -4.75096400 | -0.80094400 |
| H                                                                                                        | 4.89314900  | -3.74828000 | 3.55275200  | H                                                                                                        | -3.80575200 | -5.64296900 | -0.54286500 |
| C                                                                                                        | 3.76488600  | -3.82927700 | 1.72825000  | C                                                                                                        | -2.62023900 | -4.01233900 | 0.19314200  |
| H                                                                                                        | 3.76057600  | -4.91209900 | 1.68498500  | H                                                                                                        | -2.68781700 | -4.32593000 | 1.22800600  |

|    |             |             |             |    |             |             |             |
|----|-------------|-------------|-------------|----|-------------|-------------|-------------|
| C  | 3.13761400  | -3.09914300 | 0.72630600  | C  | -1.90474300 | -2.86742000 | -0.13474900 |
| H  | 2.66621200  | -3.63450900 | -0.08877600 | H  | -1.41610800 | -2.29662600 | 0.64528200  |
| C  | -1.77976600 | -2.99626500 | -1.29536000 | C  | -2.35375600 | 2.88489100  | -0.21194900 |
| C  | -2.06124000 | -3.51962600 | -0.03253300 | C  | -2.30639700 | 3.65189700  | -1.38086600 |
| H  | -1.59934600 | -3.08967100 | 0.84770000  | H  | -2.25931700 | 3.18467400  | -2.35969300 |
| C  | -2.94677600 | -4.58319000 | 0.09031600  | C  | -2.36777300 | 5.03756700  | -1.30900300 |
| H  | -3.16551800 | -4.98760400 | 1.07179300  | H  | -2.34703800 | 5.62465700  | -2.21963400 |
| C  | -3.55025500 | -5.12660300 | -1.03609800 | C  | -2.47129200 | 5.66675900  | -0.07442000 |
| H  | -4.23943900 | -5.95692600 | -0.93565300 | H  | -2.52579100 | 6.74766700  | -0.02100400 |
| C  | -3.27115500 | -4.60640600 | -2.29474400 | C  | -2.52011300 | 4.90943600  | 1.09006200  |
| H  | -3.73990500 | -5.02904200 | -3.17563800 | H  | -2.61751700 | 5.39821800  | 2.05235500  |
| C  | -2.38935300 | -3.54419700 | -2.42936900 | C  | -2.45593000 | 3.52436200  | 1.02707900  |
| H  | -2.18412400 | -3.15720100 | -3.42131100 | H  | -2.51781500 | 2.94339800  | 1.94036100  |
| C  | -2.87391300 | 1.26828600  | -0.71467400 | P  | 1.68485600  | -1.30223600 | -0.30830500 |
| C  | -3.66202500 | 2.34941500  | -1.12289600 | P  | -0.85780100 | -0.98607400 | -1.95118300 |
| H  | -3.20578700 | 3.24066700  | -1.53801600 | P  | -2.22785600 | 1.05842900  | -0.27120000 |
| C  | -5.04047200 | 2.28543500  | -0.98738800 | C  | -3.33914300 | 0.47129700  | 1.05414600  |
| H  | -5.64967700 | 3.12343200  | -1.30518400 | C  | -4.71728700 | 0.65201000  | 0.89079800  |
| C  | -5.63841400 | 1.15486900  | -0.44067500 | C  | -2.85431200 | -0.07975900 | 2.23774300  |
| H  | -6.71612200 | 1.11221300  | -0.33435600 | C  | -5.59061500 | 0.26970500  | 1.89731000  |
| C  | -4.85705000 | 0.08488200  | -0.02512600 | H  | -5.11817600 | 1.10261600  | -0.01031500 |
| H  | -5.32188900 | -0.79316800 | 0.40740400  | C  | -3.73361000 | -0.45436700 | 3.24596200  |
| C  | -3.47577100 | 0.14068600  | -0.15647800 | H  | -1.78934300 | -0.22112400 | 2.38272500  |
| H  | -2.87470700 | -0.69407400 | 0.18505200  | C  | -5.10048600 | -0.28297500 | 3.07545600  |
| C  | -0.59425700 | 3.07939600  | -0.82749200 | H  | -6.65673100 | 0.41084500  | 1.76408800  |
| C  | -0.19521400 | 3.84693900  | -1.92282300 | H  | -3.34936000 | -0.87924100 | 4.16581000  |
| H  | -0.13401700 | 3.41931100  | -2.91619200 | H  | -5.78626700 | -0.57605100 | 3.86172100  |
| C  | 0.12120800  | 5.18943600  | -1.74913300 | C  | 1.68763200  | -2.45551400 | 1.10951600  |
| H  | 0.42175800  | 5.78382500  | -2.60404800 | C  | 2.23449100  | -3.73321300 | 0.95758400  |
| C  | 0.03992800  | 5.76847400  | -0.49006000 | C  | 1.22674300  | -2.04980500 | 2.36172300  |
| H  | 0.28044700  | 6.81710600  | -0.35962300 | C  | 2.29746100  | -4.59420100 | 2.04344100  |
| C  | -0.35718800 | 5.00548800  | 0.60356500  | H  | 2.62567500  | -4.06339500 | 0.00227400  |
| H  | -0.42756100 | 5.45898000  | 1.58523000  | C  | 1.30194000  | -2.91267600 | 3.44761600  |
| C  | -0.67244500 | 3.66538700  | 0.43985800  | H  | 0.82028900  | -1.05454700 | 2.49984500  |
| H  | -0.99741200 | 3.08394200  | 1.29715000  | C  | 1.83243500  | -4.18599900 | 3.28825000  |
| Co | 0.12621600  | -0.26148000 | 0.15913300  | H  | 2.71952000  | -5.58439600 | 1.91799600  |
| P  | 2.32022800  | -0.68448200 | -0.50950200 | H  | 0.94908700  | -2.58837300 | 4.41966900  |
| P  | -0.54553800 | -1.66902000 | -1.51040100 | H  | 1.88938000  | -4.86005000 | 4.13492300  |
| P  | -1.07028600 | 1.32710000  | -0.99572700 | Co | -0.02377100 | 0.33863800  | -0.35392600 |
| H  | 0.48329300  | 0.65304900  | 1.34442800  | H  | 0.50470800  | 1.14367600  | 0.84267000  |
| H  | 0.70293800  | -2.17862500 | 1.59442100  | H  | -0.17815700 | 2.38634200  | -1.77712900 |
| C  | 0.24137900  | -0.43674300 | 2.37819800  | C  | 0.86766900  | 2.32773100  | -0.10375000 |
| H  | 1.26461800  | -0.35628900 | 2.76033100  | H  | 0.12609700  | 2.98897000  | 0.35607100  |
| C  | -0.76818600 | 0.27127100  | 3.20021900  | C  | 2.24747900  | 2.60197400  | 0.35439200  |
| C  | -0.37167100 | 1.39019800  | 3.93977500  | C  | 2.47840800  | 2.88874600  | 1.70378900  |
| C  | -2.07517600 | -0.20412700 | 3.31165800  | C  | 3.27613900  | 2.76276100  | -0.57322200 |
| C  | -1.27477000 | 2.03016100  | 4.77304700  | C  | 3.72590900  | 3.31917300  | 2.12106600  |
| H  | 0.65151600  | 1.74969700  | 3.87818500  | H  | 1.67400900  | 2.79254900  | 2.42747400  |
| C  | -2.97456600 | 0.43834000  | 4.14838900  | C  | 4.51939100  | 3.21166500  | -0.15266400 |
| H  | -2.36501400 | -1.09681100 | 2.77217300  | H  | 3.08166600  | 2.57670600  | -1.62205400 |
| C  | -2.57907200 | 1.55635300  | 4.87489900  | C  | 4.74749500  | 3.48555500  | 1.19031600  |
| H  | -0.96106500 | 2.88827800  | 5.35558800  | H  | 3.90023200  | 3.54571000  | 3.16624900  |
| H  | -3.98385100 | 0.05742300  | 4.25016200  | H  | 5.30961100  | 3.36344700  | -0.87818400 |

|                        |             |             |             |                        |             |             |             |
|------------------------|-------------|-------------|-------------|------------------------|-------------|-------------|-------------|
| H                      | -3.28285100 | 2.04914200  | 5.53550200  | H                      | 5.71771200  | 3.84567600  | 1.51238400  |
| N                      | -0.08054500 | -1.52903900 | 1.64307200  | N                      | 0.58606300  | 1.86344800  | -1.35563300 |
| H                      | 0.94474100  | 0.94777600  | 0.02502900  | H                      | -0.32419500 | 0.04793200  | 1.06720300  |
| <p><i>fac-III'</i></p> |             |             |             | <p><i>mer-III'</i></p> |             |             |             |
| C                      | 0.90831400  | -2.00227500 | -2.54987500 | C                      | -3.27371700 | 0.53158900  | 1.59561800  |
| H                      | 1.67130100  | -1.35482100 | -2.98612600 | H                      | -3.68631400 | 1.29869800  | 2.25266400  |
| H                      | 1.17872100  | -3.02284700 | -2.82886400 | H                      | -4.06755400 | 0.20064300  | 0.92219400  |
| C                      | -0.48364400 | -1.62720100 | -3.04260100 | C                      | -2.72543200 | -0.65009700 | 2.39197200  |
| H                      | -1.20010300 | -2.42120000 | -2.82187400 | H                      | -3.53214200 | -1.25465000 | 2.81259200  |
| H                      | -0.49950300 | -1.46826700 | -4.12335600 | H                      | -2.08728200 | -0.32446900 | 3.21692400  |
| C                      | -0.35596100 | 1.34687400  | -3.02526500 | C                      | -0.75105200 | -2.95777500 | 2.08671800  |
| H                      | -0.29350600 | 1.16716500  | -4.10112700 | H                      | -0.33071100 | -2.52214200 | 2.99623100  |
| H                      | -1.02853400 | 2.19383200  | -2.88083200 | H                      | -1.39894200 | -3.78542800 | 2.37928800  |
| C                      | 1.02625800  | 1.66722500  | -2.46060000 | C                      | 0.33973700  | -3.41481700 | 1.12195700  |
| H                      | 1.35741100  | 2.64950800  | -2.80489800 | H                      | -0.09412000 | -3.92840800 | 0.25982700  |
| H                      | 1.76564300  | 0.93596200  | -2.79285700 | H                      | 1.04559600  | -4.11021600 | 1.58014100  |
| C                      | 2.70887500  | -2.24780300 | -0.21771700 | C                      | -1.24847600 | 2.66240800  | 1.50000600  |
| C                      | 2.92018700  | -2.93347300 | 0.98080800  | C                      | -0.62211400 | 2.36893800  | 2.71714100  |
| H                      | 2.08428600  | -3.21047100 | 1.61201000  | H                      | -0.55424000 | 1.34791100  | 3.07884400  |
| C                      | 4.20664000  | -3.29487000 | 1.35320500  | C                      | -0.08457500 | 3.38806600  | 3.48982700  |
| H                      | 4.36431900  | -3.84003800 | 2.27639200  | H                      | 0.38774700  | 3.15485500  | 4.43692600  |
| C                      | 5.28574900  | -2.97697400 | 0.53739200  | C                      | -0.15685100 | 4.70542400  | 3.05137900  |
| H                      | 6.28787100  | -3.27272200 | 0.82508000  | H                      | 0.25822200  | 5.50186300  | 3.65776300  |
| C                      | 5.07916200  | -2.29091000 | -0.65297100 | C                      | -0.76417400 | 5.00014200  | 1.83733500  |
| H                      | 5.91814100  | -2.04979700 | -1.29490100 | H                      | -0.82364700 | 6.02646700  | 1.49429400  |
| C                      | 3.79666700  | -1.92039500 | -1.03070200 | C                      | -1.30463800 | 3.98502200  | 1.05807500  |
| H                      | 3.66156000  | -1.38945900 | -1.96532800 | H                      | -1.77911200 | 4.22946100  | 0.11558600  |
| C                      | -0.12224300 | -3.06269700 | -0.00655700 | C                      | -2.91614700 | -2.51146800 | 0.15154300  |
| C                      | -0.41405500 | -4.24887800 | -0.68717800 | C                      | -3.68771000 | -3.53197800 | 0.71922000  |
| H                      | 0.05124100  | -4.47737300 | -1.63868900 | H                      | -3.55658500 | -3.82409500 | 1.75569500  |
| C                      | -1.28697500 | -5.17118700 | -0.13049400 | C                      | -4.64444500 | -4.18724400 | -0.04114900 |
| H                      | -1.49439800 | -6.09663000 | -0.65502500 | H                      | -5.23497000 | -4.97866400 | 0.40511900  |
| C                      | -1.88668800 | -4.91772900 | 1.09982900  | C                      | -4.84574900 | -3.82847800 | -1.36941500 |
| H                      | -2.56646400 | -5.64456100 | 1.52901000  | H                      | -5.59364400 | -4.34290200 | -1.96133000 |
| C                      | -1.60293000 | -3.74309100 | 1.78223800  | C                      | -4.09245500 | -2.80893900 | -1.93486700 |
| H                      | -2.05679900 | -3.54636000 | 2.74629800  | H                      | -4.25348900 | -2.52248200 | -2.96745400 |
| C                      | -0.71964300 | -2.81877600 | 1.23673900  | C                      | -3.13048100 | -2.15071700 | -1.17903300 |
| H                      | -0.47646500 | -1.92308100 | 1.80000300  | H                      | -2.55894700 | -1.34793900 | -1.63002200 |
| C                      | -2.91297000 | -0.06683600 | -2.49255300 | C                      | 2.40748200  | -1.39255100 | 1.73471700  |
| C                      | -3.48591700 | 0.76769800  | -3.45408400 | C                      | 2.56985800  | -2.09209500 | 2.93477400  |
| H                      | -2.87673200 | 1.43435200  | -4.05272900 | H                      | 2.00226800  | -2.99039300 | 3.14343800  |
| C                      | -4.85809500 | 0.73681200  | -3.66695200 | C                      | 3.49234900  | -1.65558200 | 3.87584600  |
| H                      | -5.29828700 | 1.38129800  | -4.41873400 | H                      | 3.61863100  | -2.20907600 | 4.79891000  |
| C                      | -5.66203700 | -0.12062400 | -2.92674500 | C                      | 4.26081100  | -0.52497900 | 3.62899300  |
| H                      | -6.73163000 | -0.14249200 | -3.09935800 | H                      | 4.98552600  | -0.19262900 | 4.36306900  |
| C                      | -5.09592500 | -0.95471000 | -1.96935500 | C                      | 4.10778700  | 0.17204900  | 2.43604000  |
| H                      | -5.72208900 | -1.62757200 | -1.39535500 | H                      | 4.71661900  | 1.04538800  | 2.23466700  |
| C                      | -3.72688000 | -0.92676900 | -1.74725100 | C                      | 3.18099200  | -0.25068300 | 1.49551000  |
| H                      | -3.29470100 | -1.59103200 | -1.00423600 |                        |             |             |             |

|                                                                                                            |             |             |             |                                                                                                            |             |             |             |
|------------------------------------------------------------------------------------------------------------|-------------|-------------|-------------|------------------------------------------------------------------------------------------------------------|-------------|-------------|-------------|
| C                                                                                                          | 0.46868300  | 3.30018300  | -0.08404600 | H                                                                                                          | 3.08342300  | 0.29457900  | 0.56379800  |
| C                                                                                                          | 1.32604300  | 4.18572200  | 0.57318100  | P                                                                                                          | -1.94706800 | 1.28843000  | 0.50798000  |
| H                                                                                                          | 2.33063400  | 3.88360300  | 0.84009200  | P                                                                                                          | -1.70600900 | -1.64056900 | 1.21130800  |
| C                                                                                                          | 0.89545000  | 5.47113700  | 0.87776800  | P                                                                                                          | 1.23623000  | -1.93942500 | 0.44610800  |
| H                                                                                                          | 1.56670600  | 6.15236000  | 1.38724500  | C                                                                                                          | 2.17988100  | -2.50523500 | -1.00336200 |
| C                                                                                                          | -0.38228300 | 5.88298000  | 0.52639100  | C                                                                                                          | 3.55257600  | -2.74577100 | -0.92180400 |
| H                                                                                                          | -0.71205400 | 6.88847500  | 0.76011900  | C                                                                                                          | 1.49628800  | -2.75663900 | -2.19732600 |
| C                                                                                                          | -1.24254600 | 5.00247800  | -0.12249000 | C                                                                                                          | 4.23017400  | -3.24099200 | -2.02795100 |
| H                                                                                                          | -2.24263300 | 5.32091900  | -0.39299000 | H                                                                                                          | 4.09220300  | -2.55504100 | -0.00218600 |
| C                                                                                                          | -0.82548800 | 3.71444300  | -0.41810700 | C                                                                                                          | 2.18184000  | -3.25288300 | -3.29598600 |
| H                                                                                                          | -1.52088600 | 3.03033100  | -0.89038200 | H                                                                                                          | 0.42792200  | -2.57781300 | -2.27264500 |
| C                                                                                                          | 2.82983500  | 1.58126400  | -0.13436400 | C                                                                                                          | 3.54884600  | -3.49412700 | -3.21150100 |
| C                                                                                                          | 3.80640400  | 2.04064600  | -1.02442000 | H                                                                                                          | 5.29473100  | -3.43213000 | -1.96175100 |
| H                                                                                                          | 3.54588800  | 2.38226000  | -2.01862800 | H                                                                                                          | 1.64983500  | -3.45353300 | -4.21850800 |
| C                                                                                                          | 5.13653500  | 2.08948100  | -0.63047000 | H                                                                                                          | 4.08308600  | -3.88232600 | -4.07075600 |
| H                                                                                                          | 5.88698300  | 2.45110300  | -1.32369300 | C                                                                                                          | -2.83008800 | 2.00151500  | -0.91508800 |
| C                                                                                                          | 5.50138200  | 1.69055300  | 0.64919700  | C                                                                                                          | -3.97841400 | 2.77467100  | -0.71147000 |
| H                                                                                                          | 6.54003600  | 1.73699300  | 0.95516500  | C                                                                                                          | -2.37920500 | 1.76149500  | -2.21333300 |
| C                                                                                                          | 4.53444900  | 1.23623900  | 1.53793100  | C                                                                                                          | -4.65714100 | 3.30307000  | -1.79959000 |
| H                                                                                                          | 4.81608200  | 0.92475800  | 2.53672200  | H                                                                                                          | -4.34455000 | 2.97601000  | 0.28920400  |
| C                                                                                                          | 3.20455600  | 1.17741700  | 1.14865300  | C                                                                                                          | -3.06302600 | 2.29575100  | -3.29787700 |
| H                                                                                                          | 2.46030400  | 0.81622700  | 1.84918900  | H                                                                                                          | -1.49785300 | 1.15238000  | -2.37697300 |
| Co                                                                                                         | -0.21897300 | -0.04091300 | -0.04346100 | C                                                                                                          | -4.19992600 | 3.06588000  | -3.09147100 |
| P                                                                                                          | 1.01198000  | -1.80635400 | -0.70687400 | H                                                                                                          | -5.54499300 | 3.90312000  | -1.63832000 |
| P                                                                                                          | -1.12104700 | -0.11176700 | -2.17320200 | H                                                                                                          | -2.70929200 | 2.10883200  | -4.30507500 |
| P                                                                                                          | 1.06931800  | 1.64968100  | -0.59552300 | H                                                                                                          | -4.73338200 | 3.48220700  | -3.93796500 |
| N                                                                                                          | -1.51439900 | 0.74914800  | 0.93217100  | Co                                                                                                         | -0.26196200 | -0.27205200 | 0.17265800  |
| H                                                                                                          | -2.45703900 | 0.40588400  | 0.73318600  | N                                                                                                          | 0.84474800  | 0.71507300  | -0.88771200 |
| H                                                                                                          | 0.68136500  | -0.02354900 | 1.11194300  | H                                                                                                          | 1.27958400  | 0.22843300  | -1.67114500 |
| C                                                                                                          | -1.55829200 | 1.65017300  | 2.06810100  | H                                                                                                          | -0.67631000 | -1.00350500 | -0.96978200 |
| H                                                                                                          | -0.55075100 | 1.99888200  | 2.28865300  | C                                                                                                          | 1.19945700  | 2.12643300  | -0.92087400 |
| H                                                                                                          | -2.16773500 | 2.52444800  | 1.81121200  | H                                                                                                          | 0.41683100  | 2.64203700  | -1.50036800 |
| C                                                                                                          | -2.16950400 | 0.92929900  | 3.25004600  | H                                                                                                          | 1.14844500  | 2.53659200  | 0.08876500  |
| C                                                                                                          | -1.35824700 | 0.20708500  | 4.12554700  | C                                                                                                          | 2.54612400  | 2.38518000  | -1.54740900 |
| C                                                                                                          | -3.54709100 | 0.96555400  | 3.46493100  | C                                                                                                          | 2.75677100  | 2.12708100  | -2.90241800 |
| C                                                                                                          | -1.91541300 | -0.45228300 | 5.21282800  | C                                                                                                          | 3.58969900  | 2.90343400  | -0.78392800 |
| H                                                                                                          | -0.28300000 | 0.18976800  | 3.97779200  | C                                                                                                          | 3.99487900  | 2.37029200  | -3.48011300 |
| C                                                                                                          | -4.10425500 | 0.30015100  | 4.54845600  | H                                                                                                          | 1.94413700  | 1.75943600  | -3.52337000 |
| H                                                                                                          | -4.18639300 | 1.54226400  | 2.80310300  | C                                                                                                          | 4.82711900  | 3.15555800  | -1.36432700 |
| C                                                                                                          | -3.28917000 | -0.41019200 | 5.42241200  | H                                                                                                          | 3.42900500  | 3.13474200  | 0.26449500  |
| H                                                                                                          | -1.27709800 | -0.98777800 | 5.90621100  | C                                                                                                          | 5.03239300  | 2.88435800  | -2.71055200 |
| H                                                                                                          | -5.17287200 | 0.35018200  | 4.72172700  | H                                                                                                          | 4.14646200  | 2.17673200  | -4.53558400 |
| H                                                                                                          | -3.72314100 | -0.91777100 | 6.27596900  | H                                                                                                          | 5.62911200  | 3.57320700  | -0.76668400 |
|                                                                                                            |             |             |             | H                                                                                                          | 5.99566500  | 3.08577300  | -3.16420300 |
| 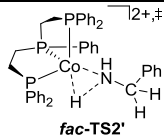 <p><i>fac-TS2'</i></p> |             |             |             |  <p><i>mer-TS2'</i></p> |             |             |             |
| C                                                                                                          | -0.04151900 | -3.65290900 | -0.26858100 | C                                                                                                          | -3.06841800 | -0.30949700 | -1.77740900 |
| H                                                                                                          | 0.38427200  | -3.87603300 | -1.25056600 | H                                                                                                          | -3.41942000 | -1.02899600 | -2.51930600 |
| H                                                                                                          | 0.17841100  | -4.50902700 | 0.37182200  | H                                                                                                          | -3.92740100 | -0.01524700 | -1.17085000 |
| C                                                                                                          | -1.54936500 | -3.40916900 | -0.35693400 |                                                                                                            |             |             |             |

|   |             |             |             |   |             |             |             |
|---|-------------|-------------|-------------|---|-------------|-------------|-------------|
| H | -2.04624100 | -3.71735600 | 0.56381300  | C | -2.44527700 | 0.91680300  | -2.43892800 |
| H | -1.98829100 | -4.01152800 | -1.15515200 | H | -3.20766100 | 1.54914800  | -2.89906100 |
| C | -1.96685400 | -1.36473600 | -2.46298500 | H | -1.73158400 | 0.64273500  | -3.22011200 |
| H | -2.30479200 | -2.26722700 | -2.97661800 | C | -0.48075700 | 3.16698800  | -1.89543600 |
| H | -2.69012000 | -0.57631100 | -2.68158500 | H | -0.05757800 | 2.78721500  | -2.82878500 |
| C | -0.57528200 | -0.95716900 | -2.93043600 | H | -1.09406100 | 4.03893600  | -2.12940100 |
| H | -0.59606000 | -0.60672000 | -3.96517300 | C | 0.61505800  | 3.50465100  | -0.88919800 |
| H | 0.12709200  | -1.79129400 | -2.86953500 | H | 0.19484700  | 3.96134200  | 0.01070800  |
| C | 2.65948300  | -2.52494600 | 0.16900400  | H | 1.34550500  | 4.20983800  | -1.28856300 |
| C | 3.13696300  | -3.81536500 | 0.42615500  | C | -1.20044300 | -2.58130500 | -1.53206600 |
| H | 2.46418900  | -4.61906900 | 0.70091900  | C | -0.71676700 | -2.37548400 | -2.82846600 |
| C | 4.49663900  | -4.07386600 | 0.34717300  | H | -0.77796300 | -1.40042200 | -3.29923900 |
| H | 4.86556100  | -5.07241300 | 0.54949700  | C | -0.16966700 | -3.42855600 | -3.54715600 |
| C | 5.38360100  | -3.05477200 | 0.01680800  | H | 0.18488700  | -3.26316400 | -4.55782400 |
| H | 6.44567600  | -3.26255800 | -0.04141100 | C | -0.08787400 | -4.69363100 | -2.97696300 |
| C | 4.91202100  | -1.77354000 | -0.23792900 | H | 0.33040900  | -5.51778400 | -3.54279800 |
| H | 5.60367100  | -0.98104700 | -0.49722400 | C | -0.55564400 | -4.90241000 | -1.68587400 |
| C | 3.55166800  | -1.50487500 | -0.16651500 | H | -0.50469100 | -5.88953800 | -1.24133700 |
| H | 3.18594000  | -0.50729600 | -0.37842000 | C | -1.10516800 | -3.85259000 | -0.96102000 |
| C | 0.50619800  | -1.77954200 | 2.06896300  | H | -1.48796200 | -4.03972800 | 0.03530900  |
| C | -0.79792300 | -1.86081400 | 2.59192000  | C | -2.75444900 | 2.68857700  | -0.10471300 |
| H | -1.59907800 | -2.32411100 | 2.03496600  | C | -3.64235000 | 3.57083200  | -0.73127100 |
| C | -1.06723200 | -1.40692300 | 3.88091900  | H | -3.60589100 | 3.73491300  | -1.80341000 |
| H | -2.07189600 | -1.49162400 | 4.27787800  | C | -4.58778100 | 4.25344500  | 0.01858000  |
| C | -0.04989000 | -0.87771500 | 4.65807800  | H | -5.27287300 | 4.93464100  | -0.47218400 |
| H | -0.25867100 | -0.53559900 | 5.66513300  | C | -4.65494300 | 4.06529800  | 1.39503500  |
| C | 1.25276300  | -0.80946100 | 4.15716900  | H | -5.39448600 | 4.60127700  | 1.97824100  |
| H | 2.05059600  | -0.41792800 | 4.77693500  | C | -3.77651900 | 3.19194500  | 2.02133700  |
| C | 1.53006800  | -1.24479000 | 2.87822600  | H | -3.82966000 | 3.04439100  | 3.09356000  |
| H | 2.54359200  | -1.19205400 | 2.49888200  | C | -2.82878600 | 2.50346300  | 1.27480100  |
| C | -3.74021400 | -1.48646200 | -0.11988000 | H | -2.15141100 | 1.81841700  | 1.77044800  |
| C | -4.72054100 | -2.27789400 | -0.72738200 | C | 2.47613400  | 1.38357300  | -1.75724700 |
| H | -4.46413800 | -2.98047300 | -1.51297900 | C | 2.97369000  | 2.28680200  | -2.70222700 |
| C | -6.04402100 | -2.16833300 | -0.32749400 | H | 2.75257600  | 3.34528100  | -2.63726200 |
| H | -6.80111800 | -2.78254400 | -0.80072200 | C | 3.78406500  | 1.83582900  | -3.73408500 |
| C | -6.39890300 | -1.27382100 | 0.67670100  | H | 4.17241400  | 2.54214400  | -4.45847400 |
| H | -7.43438800 | -1.19244900 | 0.98582700  | C | 4.10533200  | 0.48659800  | -3.83288600 |
| C | -5.42956400 | -0.48538700 | 1.28240600  | H | 4.74241800  | 0.14081800  | -4.63858800 |
| H | -5.70771600 | 0.21216700  | 2.06385400  | C | 3.61715900  | -0.41504600 | -2.89587300 |
| C | -4.10195900 | -0.58917900 | 0.88608800  | H | 3.87375700  | -1.46537300 | -2.96648000 |
| H | -3.34717900 | 0.03003500  | 1.35888600  | C | 2.80161800  | 0.02653400  | -1.86305200 |
| C | -0.95141100 | 1.85694600  | -2.32589100 | H | 2.43968600  | -0.68412100 | -1.12818400 |
| C | -0.53291100 | 2.69424000  | -3.36475800 | P | -1.88955700 | -1.16711700 | -0.59128900 |
| H | 0.43387100  | 2.55281900  | -3.83203500 | P | -1.51395700 | 1.83157600  | -1.13436400 |
| C | -1.36180400 | 3.71682200  | -3.80545200 | P | 1.43535700  | 1.93016200  | -0.36019700 |
| H | -1.03162400 | 4.36327900  | -4.61009600 | C | 2.50984200  | 2.31271300  | 1.05884400  |
| C | -2.60671500 | 3.91124200  | -3.22032500 | C | 3.89206600  | 2.12773800  | 0.99242400  |
| H | -3.24922700 | 4.71166500  | -3.56815800 | C | 1.92658600  | 2.80533200  | 2.23239300  |
| C | -3.02659700 | 3.08173600  | -2.18697200 | C | 4.68258100  | 2.45044400  | 2.08772200  |
| H | -3.99673600 | 3.23310000  | -1.72820400 | H | 4.35312200  | 1.74722200  | 0.08911000  |
| C | -2.20299200 | 2.05951400  | -1.73791600 | C | 2.72501500  | 3.12777100  | 3.31911100  |
| H | -2.53010500 | 1.43140600  | -0.91736600 | H | 0.85288400  | 2.95190300  | 2.29979300  |
| C | 1.75889800  | 0.77545500  | -2.42792600 | C | 4.10298200  | 2.95069800  | 3.24643400  |



|                                                                                                           |             |             |             |                                                                                                           |             |             |             |
|-----------------------------------------------------------------------------------------------------------|-------------|-------------|-------------|-----------------------------------------------------------------------------------------------------------|-------------|-------------|-------------|
| C                                                                                                         | 2.38205400  | 0.01185800  | -3.41686000 | H                                                                                                         | 5.75625800  | 2.31544900  | 2.03128400  |
| H                                                                                                         | 1.88489900  | -0.83745200 | -3.86812500 | H                                                                                                         | 2.27395200  | 3.52165200  | 4.22229000  |
| C                                                                                                         | 3.65810800  | 0.34743200  | -3.85360300 | H                                                                                                         | 4.72557200  | 3.20632400  | 4.09585800  |
| H                                                                                                         | 4.13025300  | -0.24352200 | -4.62958500 | C                                                                                                         | -2.98547000 | -1.85424600 | 0.69474200  |
| C                                                                                                         | 4.32012200  | 1.43853100  | -3.30757600 | C                                                                                                         | -3.97886600 | -2.77176400 | 0.33424100  |
| H                                                                                                         | 5.31160300  | 1.70168000  | -3.65727300 | C                                                                                                         | -2.89590700 | -1.42020600 | 2.01661900  |
| C                                                                                                         | 3.70543500  | 2.20172600  | -2.31977300 | C                                                                                                         | -4.86037200 | -3.24935500 | 1.29227700  |
| H                                                                                                         | 4.21498300  | 3.06104100  | -1.89970500 | H                                                                                                         | -4.06461900 | -3.12194500 | -0.68851300 |
| C                                                                                                         | 2.43350700  | 1.87107000  | -1.87928000 | C                                                                                                         | -3.78045500 | -1.90395600 | 2.97194700  |
| H                                                                                                         | 1.95908400  | 2.48766300  | -1.12403000 | H                                                                                                         | -2.13735200 | -0.70209300 | 2.30411400  |
| Co                                                                                                        | -0.24618700 | -0.28417300 | 0.22158400  | C                                                                                                         | -4.76115700 | -2.81790200 | 2.61074800  |
| P                                                                                                         | 0.89075900  | -2.16298400 | 0.31800500  | H                                                                                                         | -5.62699100 | -3.96087300 | 1.00876100  |
| P                                                                                                         | -1.99171600 | -1.61157200 | -0.62148300 | H                                                                                                         | -3.70432700 | -1.56669800 | 3.99905800  |
| P                                                                                                         | 0.06713400  | 0.41069100  | -1.85374400 | H                                                                                                         | -5.45087700 | -3.19545700 | 3.35651300  |
| N                                                                                                         | -0.54351400 | 1.26655300  | 1.17598600  | Co                                                                                                        | -0.16679700 | 0.33369500  | -0.11550900 |
| H                                                                                                         | -0.58662800 | 1.03152700  | 2.17078500  | N                                                                                                         | 0.78238700  | -0.58326200 | 1.12058400  |
| H                                                                                                         | 0.86715400  | 0.62995500  | 0.64248800  | H                                                                                                         | 1.51817800  | -0.05980000 | 1.59714900  |
| C                                                                                                         | -0.41086200 | 2.71638700  | 1.03910900  | H                                                                                                         | -0.43121100 | 0.72432000  | 1.27572700  |
| H                                                                                                         | 0.02656300  | 2.94291200  | 0.06639200  | C                                                                                                         | 0.59977700  | -1.85427100 | 1.81871100  |
| H                                                                                                         | -1.42915300 | 3.12356800  | 1.01035500  | H                                                                                                         | 0.13470100  | -1.67607800 | 2.79450100  |
| C                                                                                                         | 0.35510500  | 3.34689900  | 2.17212200  | H                                                                                                         | -0.06238400 | -2.49303200 | 1.23773000  |
| C                                                                                                         | 1.74904000  | 3.28764900  | 2.21147700  | C                                                                                                         | 1.95404700  | -2.49245100 | 2.00736200  |
| C                                                                                                         | -0.32480000 | 3.98435300  | 3.20878100  | C                                                                                                         | 2.66362100  | -2.30146800 | 3.19282500  |
| C                                                                                                         | 2.44874900  | 3.85682200  | 3.26608200  | C                                                                                                         | 2.51716400  | -3.25951300 | 0.98625400  |
| H                                                                                                         | 2.29723500  | 2.80960800  | 1.40495200  | C                                                                                                         | 3.91510400  | -2.87843600 | 3.35951000  |
| C                                                                                                         | 0.37445000  | 4.55362400  | 4.26581200  | H                                                                                                         | 2.22709300  | -1.72270400 | 4.00115300  |
| H                                                                                                         | -1.40785600 | 4.05580000  | 3.18222300  | C                                                                                                         | 3.76732900  | -3.83814000 | 1.15590900  |
| C                                                                                                         | 1.76134400  | 4.48939300  | 4.29608700  | H                                                                                                         | 1.96334600  | -3.42599400 | 0.06784800  |
| H                                                                                                         | 3.53200400  | 3.82015300  | 3.28057900  | C                                                                                                         | 4.46817500  | -3.64557200 | 2.34085900  |
| H                                                                                                         | -0.16381200 | 5.05893200  | 5.05918600  | H                                                                                                         | 4.45305300  | -2.74271700 | 4.29040800  |
| H                                                                                                         | 2.30801000  | 4.94290800  | 5.11456900  | H                                                                                                         | 4.19238600  | -4.44978600 | 0.36851900  |
|                                                                                                           |             |             |             | H                                                                                                         | 5.44083500  | -4.10408000 | 2.47579600  |
| 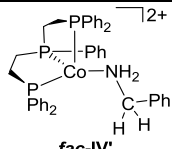 <p><i>fac-IV'</i></p> |             |             |             |  <p><i>mer-IV'</i></p> |             |             |             |
| C                                                                                                         | 1.89473000  | -2.56628100 | -1.69285800 | C                                                                                                         | -3.24386000 | -0.59553200 | 1.60686900  |
| H                                                                                                         | 2.57858300  | -2.01215800 | -2.34092400 | H                                                                                                         | -3.88859200 | -0.05528000 | 2.30199600  |
| H                                                                                                         | 2.34697000  | -3.55123800 | -1.55147900 | H                                                                                                         | -3.88325900 | -1.06553900 | 0.85629700  |
| C                                                                                                         | 0.49725900  | -2.64756100 | -2.29555200 | C                                                                                                         | -2.41306400 | -1.65404000 | 2.32872900  |
| H                                                                                                         | -0.02919100 | -3.53509500 | -1.94061700 | H                                                                                                         | -3.02850600 | -2.50535600 | 2.62798100  |
| H                                                                                                         | 0.53664300  | -2.72331100 | -3.38448700 | H                                                                                                         | -1.93914400 | -1.25730700 | 3.22974000  |
| C                                                                                                         | -0.24709900 | 0.17996200  | -2.96647800 | C                                                                                                         | 0.19556000  | -3.22482700 | 1.98930100  |
| H                                                                                                         | -0.05732200 | -0.20643100 | -3.97095200 | H                                                                                                         | 0.50910700  | -2.72544200 | 2.91014100  |
| H                                                                                                         | -1.17580600 | 0.75273900  | -3.01507000 | H                                                                                                         | -0.20715600 | -4.20319900 | 2.25771900  |
| C                                                                                                         | 0.90836400  | 1.08633100  | -2.52697500 | C                                                                                                         | 1.35351500  | -3.34473300 | 1.00123300  |
| H                                                                                                         | 0.94319300  | 1.97845000  | -3.15608900 | H                                                                                                         | 1.06356100  | -3.94745900 | 0.13788600  |
| H                                                                                                         | 1.86939100  | 0.58238400  | -2.65279900 | H                                                                                                         | 2.22825100  | -3.81344900 | 1.45460500  |
| C                                                                                                         | 3.67486700  | -1.49494300 | 0.36582400  | C                                                                                                         | -1.98932900 | 2.05939700  | 1.80322600  |
| C                                                                                                         | 4.18746500  | -2.14265800 | 1.49234400  | C                                                                                                         | -1.43447600 | 1.85079200  | 3.07088500  |
| H                                                                                                         | 3.54105800  | -2.71697400 | 2.14452500  | H                                                                                                         | -1.12861600 | 0.85932500  | 3.38913500  |

|    |             |             |             |   |             |             |             |
|----|-------------|-------------|-------------|---|-------------|-------------|-------------|
| C  | 5.54636900  | -2.07209900 | 1.76792800  | C | -1.28466900 | 2.91094400  | 3.95363200  |
| H  | 5.94297000  | -2.58266100 | 2.63759500  | H | -0.87088500 | 2.73696700  | 4.94019400  |
| C  | 6.39549900  | -1.36583500 | 0.92584700  | C | -1.67422000 | 4.19104100  | 3.57649600  |
| H  | 7.45686400  | -1.32229000 | 1.14036400  | H | -1.56240600 | 5.01801300  | 4.26777200  |
| C  | 5.88699300  | -0.71967800 | -0.19549900 | C | -2.21273600 | 4.40655800  | 2.31485600  |
| H  | 6.54839600  | -0.16888000 | -0.85352800 | H | -2.52086500 | 5.40238000  | 2.01821700  |
| C  | 4.53068700  | -0.77618500 | -0.47432200 | C | -2.36886500 | 3.34856900  | 1.42772600  |
| H  | 4.15010100  | -0.25377500 | -1.34523700 | H | -2.79916200 | 3.53244200  | 0.45078800  |
| C  | 1.04262900  | -2.57480000 | 1.20871600  | C | -1.86995800 | -3.24789900 | -0.08800000 |
| C  | 0.51911800  | -3.86511000 | 1.06118100  | C | -2.44706000 | -4.46384100 | 0.29140500  |
| H  | 0.72643300  | -4.44664000 | 0.17080300  | H | -2.43684000 | -4.78781500 | 1.32703800  |
| C  | -0.23228800 | -4.42740700 | 2.08047900  | C | -3.04663100 | -5.27338400 | -0.66194800 |
| H  | -0.60951500 | -5.43801900 | 1.97426400  | H | -3.49410600 | -6.21421800 | -0.36379600 |
| C  | -0.49375900 | -3.70854700 | 3.24621900  | C | -3.07422600 | -4.87914500 | -1.99574900 |
| H  | -1.07687100 | -4.16170900 | 4.03945900  | H | -3.54400600 | -5.51513600 | -2.73684600 |
| C  | 0.01659000  | -2.42866800 | 3.40598200  | C | -2.50424500 | -3.67213200 | -2.37858300 |
| H  | -0.15447400 | -1.88396000 | 4.32740900  | H | -2.53051700 | -3.36380700 | -3.41709700 |
| C  | 0.78259000  | -1.85750900 | 2.39214200  | C | -1.90382900 | -2.85765600 | -1.42721000 |
| H  | 1.26052700  | -0.89534100 | 2.56685200  | H | -1.47136600 | -1.90993300 | -1.73351500 |
| C  | -2.26212000 | -1.83075300 | -2.21510800 | C | 2.89780600  | -0.96719400 | 1.69384100  |
| C  | -2.95359900 | -1.44116900 | -3.36322400 | C | 4.09694500  | -1.61706100 | 2.00416100  |
| H  | -2.53100100 | -0.72507600 | -4.05771100 | H | 4.40707800  | -2.49764000 | 1.45196900  |
| C  | -4.20212900 | -1.98462900 | -3.64119500 | C | 4.90887600  | -1.12837200 | 3.01617700  |
| H  | -4.73133400 | -1.67923400 | -4.53621300 | H | 5.83845600  | -1.63364000 | 3.25068200  |
| C  | -4.76624900 | -2.91957900 | -2.78385300 | C | 4.53273300  | 0.00597600  | 3.72874400  |
| H  | -5.73830500 | -3.34291900 | -3.00762300 | H | 5.17054000  | 0.38342600  | 4.51943600  |
| C  | -4.08173000 | -3.31401600 | -1.63960900 | C | 3.34244300  | 0.65452600  | 3.42888900  |
| H  | -4.51891700 | -4.04601200 | -0.97046000 | H | 3.04904500  | 1.53724900  | 3.98479500  |
| C  | -2.83932700 | -2.76881800 | -1.35253300 | C | 2.52675900  | 0.17046200  | 2.41318700  |
| H  | -2.31606200 | -3.07982100 | -0.45287100 | H | 1.59542900  | 0.68592200  | 2.19335100  |
| C  | -0.29037200 | 3.01307300  | -0.61262800 | P | -2.17126600 | 0.62827800  | 0.66925200  |
| C  | -0.31949200 | 3.71957000  | 0.59449500  | P | -1.08214300 | -2.17605500 | 1.16134400  |
| H  | 0.32491200  | 3.42817100  | 1.41826100  | P | 1.79388700  | -1.63709000 | 0.40146300  |
| C  | -1.12871400 | 4.83802800  | 0.73197700  | C | 2.76762600  | -1.81976700 | -1.13177400 |
| H  | -1.12774700 | 5.39117100  | 1.66413700  | C | 3.93486200  | -1.07975900 | -1.33741000 |
| C  | -1.92177900 | 5.26080400  | -0.32959100 | C | 2.28732300  | -2.64917800 | -2.15130100 |
| H  | -2.54634900 | 6.14009200  | -0.22464500 | C | 4.62143500  | -1.18680600 | -2.54034700 |
| C  | -1.89902600 | 4.56373900  | -1.53004900 | H | 4.32746300  | -0.43968200 | -0.55573500 |
| H  | -2.50483700 | 4.89772300  | -2.36431100 | C | 2.98319900  | -2.75507600 | -3.34636200 |
| C  | -1.08897900 | 3.44316100  | -1.67322900 | H | 1.37902500  | -3.22749900 | -2.01896300 |
| H  | -1.07498600 | 2.93246900  | -2.62833500 | C | 4.14994500  | -2.02434000 | -3.54260400 |
| C  | 2.47148500  | 2.29080600  | -0.33071100 | H | 5.53275700  | -0.61955200 | -2.68883600 |
| C  | 3.10938800  | 3.15725700  | -1.22324200 | H | 2.61710700  | -3.41376200 | -4.12519500 |
| H  | 2.67658600  | 3.37698000  | -2.19261600 | H | 4.69360700  | -2.11270900 | -4.47581800 |
| C  | 4.30187900  | 3.76723400  | -0.86299400 | C | -3.22282400 | 1.15722700  | -0.72583000 |
| H  | 4.79365000  | 4.43746900  | -1.55835000 | C | -4.52344600 | 1.61908500  | -0.49857400 |
| C  | 4.85463500  | 3.53602000  | 0.39239900  | C | -2.75303200 | 1.05025000  | -2.03497400 |
| H  | 5.77942100  | 4.02594400  | 0.67401400  | C | -5.33104000 | 1.97341500  | -1.56923000 |
| C  | 4.22043700  | 2.68372000  | 1.28616800  | H | -4.91012200 | 1.71159400  | 0.51026700  |
| H  | 4.64926000  | 2.50399200  | 2.26496000  | C | -3.56442300 | 1.40784000  | -3.10408700 |
| C  | 3.03494600  | 2.05777400  | 0.92342100  | H | -1.75131400 | 0.68039100  | -2.22757000 |
| H  | 2.55133300  | 1.38331600  | 1.62228600  | C | -4.85269700 | 1.87014200  | -2.87103000 |
| Co | 0.14375100  | -0.35401900 | 0.23130000  | H | -6.33732700 | 2.33182400  | -1.38672600 |

|                                                                                                       |             |             |             |                                                                                                        |             |             |             |
|-------------------------------------------------------------------------------------------------------|-------------|-------------|-------------|--------------------------------------------------------------------------------------------------------|-------------|-------------|-------------|
| P                                                                                                     | 1.92107100  | -1.64761500 | -0.08907500 | H                                                                                                      | -3.19295700 | 1.32296900  | -4.11867000 |
| P                                                                                                     | -0.59089400 | -1.21928400 | -1.79241400 | H                                                                                                      | -5.48729100 | 2.14890600  | -3.70407700 |
| P                                                                                                     | 0.84067900  | 1.57184500  | -0.73216100 | Co                                                                                                     | -0.12354100 | -0.38122700 | 0.27135800  |
| N                                                                                                     | -1.51875900 | 0.29428400  | 1.14256000  | N                                                                                                      | 0.86340500  | 1.11236600  | -0.69653600 |
| H                                                                                                     | -1.75611300 | -0.43403500 | 1.81775200  | H                                                                                                      | 1.83977100  | 1.09756300  | -0.40357800 |
| H                                                                                                     | -1.27622600 | 1.10247400  | 1.71575900  | H                                                                                                      | 0.92040500  | 0.82904100  | -1.67605800 |
| C                                                                                                     | -2.79860200 | 0.64769900  | 0.43652900  | C                                                                                                      | 0.45269000  | 2.55847100  | -0.68223400 |
| H                                                                                                     | -2.58881600 | 1.51834500  | -0.18382600 | H                                                                                                      | -0.56194900 | 2.61147200  | -1.07625700 |
| H                                                                                                     | -3.04880700 | -0.18788800 | -0.21508600 | H                                                                                                      | 0.42207900  | 2.87532000  | 0.35979700  |
| C                                                                                                     | -3.91053700 | 0.91950900  | 1.40956600  | C                                                                                                      | 1.38902600  | 3.41649000  | -1.48273300 |
| C                                                                                                     | -4.09003100 | 2.19321200  | 1.95033800  | C                                                                                                      | 1.19204400  | 3.58859100  | -2.85364300 |
| C                                                                                                     | -4.75801000 | -0.11375300 | 1.81149700  | C                                                                                                      | 2.48527300  | 4.02736400  | -0.87284000 |
| C                                                                                                     | -5.09314900 | 2.42687000  | 2.88133300  | C                                                                                                      | 2.08025200  | 4.34784100  | -3.60282000 |
| H                                                                                                     | -3.45559100 | 3.01269400  | 1.62632500  | H                                                                                                      | 0.32578600  | 3.14683000  | -3.33815900 |
| C                                                                                                     | -5.76212300 | 0.11965200  | 2.74168600  | C                                                                                                      | 3.37385800  | 4.78763400  | -1.62137600 |
| H                                                                                                     | -4.64858300 | -1.10315600 | 1.37707700  | H                                                                                                      | 2.63601700  | 3.92732500  | 0.19823400  |
| C                                                                                                     | -5.92831000 | 1.38988800  | 3.27966600  | C                                                                                                      | 3.17341500  | 4.94599700  | -2.98725800 |
| H                                                                                                     | -5.23283100 | 3.42160100  | 3.28833900  | H                                                                                                      | 1.91274200  | 4.48597900  | -4.66460500 |
| H                                                                                                     | -6.42400300 | -0.68574900 | 3.03813700  | H                                                                                                      | 4.21551900  | 5.26880000  | -1.13695900 |
| H                                                                                                     | -6.71645100 | 1.57480400  | 4.00010000  | H                                                                                                      | 3.86153300  | 5.54704500  | -3.57001700 |
| 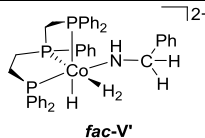 <p><i>fac-V</i></p> |             |             |             |  <p><i>mer-V</i></p> |             |             |             |
| C                                                                                                     | -1.13502900 | 1.51537700  | -2.71552900 | C                                                                                                      | 1.02845200  | -2.63315000 | 1.68026900  |
| H                                                                                                     | -1.71011500 | 0.69104500  | -3.13894500 | H                                                                                                      | 0.67258600  | -3.62775900 | 1.95222600  |
| H                                                                                                     | -1.53750500 | 2.44227100  | -3.12733000 | H                                                                                                      | 2.12025000  | -2.66272900 | 1.70173300  |
| C                                                                                                     | 0.33910900  | 1.35010200  | -3.04652500 | C                                                                                                      | 0.51064500  | -1.55585200 | 2.63185100  |
| H                                                                                                     | 0.91090100  | 2.24584500  | -2.79337500 | H                                                                                                      | 0.94842800  | -1.65911900 | 3.62659300  |
| H                                                                                                     | 0.50153800  | 1.14268800  | -4.10695900 | H                                                                                                      | -0.57662500 | -1.58671100 | 2.73297000  |
| C                                                                                                     | 0.34968900  | -1.61547600 | -2.73108900 | C                                                                                                      | 0.24545400  | 1.52963200  | 2.66124100  |
| H                                                                                                     | 0.16457600  | -1.49194000 | -3.80097600 | H                                                                                                      | -0.83037100 | 1.37567100  | 2.77299000  |
| H                                                                                                     | 1.12427500  | -2.37600300 | -2.62046700 | H                                                                                                      | 0.66487300  | 1.68612700  | 3.65703000  |
| C                                                                                                     | -0.90957500 | -2.06372200 | -1.99380100 | C                                                                                                      | 0.56356500  | 2.70096200  | 1.73291100  |
| H                                                                                                     | -1.13980200 | -3.10168500 | -2.24235700 | H                                                                                                      | 1.62773700  | 2.94205300  | 1.78137200  |
| H                                                                                                     | -1.77482600 | -1.45352000 | -2.26042800 | H                                                                                                      | 0.01247500  | 3.60022200  | 2.01150600  |
| C                                                                                                     | -3.13533000 | 1.10712900  | -0.58286400 | C                                                                                                      | -0.86441700 | -3.30079900 | -0.51121600 |
| C                                                                                                     | -3.99506100 | 0.67362500  | -1.59356800 | C                                                                                                      | -1.69287000 | -3.85239800 | 0.46668800  |
| H                                                                                                     | -3.64961900 | 0.53295600  | -2.61025800 | H                                                                                                      | -1.49687100 | -3.69540200 | 1.52141700  |
| C                                                                                                     | -5.33954300 | 0.45333300  | -1.31852700 | C                                                                                                      | -2.77365800 | -4.64455400 | 0.09823100  |
| H                                                                                                     | -6.00336000 | 0.13697300  | -2.11469400 | H                                                                                                      | -3.40146600 | -5.08627500 | 0.86314500  |
| C                                                                                                     | -5.83326600 | 0.65531700  | -0.03769100 | C                                                                                                      | -3.04349700 | -4.87752800 | -1.24387100 |
| H                                                                                                     | -6.88433100 | 0.49309000  | 0.17034100  | H                                                                                                      | -3.88447800 | -5.49906700 | -1.52775400 |
| C                                                                                                     | -4.98035600 | 1.08045200  | 0.97498100  | C                                                                                                      | -2.22624700 | -4.32302500 | -2.22273700 |
| H                                                                                                     | -5.36398300 | 1.24991100  | 1.97411600  | H                                                                                                      | -2.42612500 | -4.51379900 | -3.27065000 |
| C                                                                                                     | -3.63993500 | 1.30540400  | 0.70606400  | C                                                                                                      | -1.14134600 | -3.53724200 | -1.86148100 |
| H                                                                                                     | -2.99625000 | 1.67048200  | 1.49957000  | H                                                                                                      | -0.49123400 | -3.14085300 | -2.63473900 |
| C                                                                                                     | -1.27829100 | 3.29135700  | -0.39015300 | C                                                                                                      | 2.78534800  | 0.20028900  | 2.15533900  |
| C                                                                                                     | -2.28806800 | 4.13822700  | -0.86368900 | C                                                                                                      | 3.21128000  | 0.18510000  | 3.49027800  |
| H                                                                                                     | -3.11255100 | 3.74328200  | -1.44705400 | H                                                                                                      | 2.50157800  | 0.08338500  | 4.30510600  |
| C                                                                                                     | -2.25463000 | 5.49303400  | -0.57516500 | C                                                                                                      | 4.55899700  | 0.30060900  | 3.79195000  |

|    |             |             |             |    |             |             |             |
|----|-------------|-------------|-------------|----|-------------|-------------|-------------|
| H  | -3.03946700 | 6.14009200  | -0.94893900 | H  | 4.88113500  | 0.28652300  | 4.82648300  |
| C  | -1.22417400 | 6.01786600  | 0.19777400  | C  | 5.49263700  | 0.43371500  | 2.76963100  |
| H  | -1.20374400 | 7.07687600  | 0.42682100  | H  | 6.54598800  | 0.52321300  | 3.00798100  |
| C  | -0.22723000 | 5.18254000  | 0.67978900  | C  | 5.07562900  | 0.45199900  | 1.44628900  |
| H  | 0.57376300  | 5.58523100  | 1.28841800  | H  | 5.80160900  | 0.55677300  | 0.64884500  |
| C  | -0.25082600 | 3.82354700  | 0.38683500  | C  | 3.72598400  | 0.33575500  | 1.13672100  |
| H  | 0.53946000  | 3.19165300  | 0.77395400  | H  | 3.41260300  | 0.35220700  | 0.10063400  |
| C  | 2.83375000  | 0.00541400  | -2.31090600 | C  | -1.35996300 | 3.09590800  | -0.48462800 |
| C  | 3.48935500  | -0.96392600 | -3.07458900 | C  | -2.32344700 | 3.37812100  | 0.48496300  |
| H  | 2.95198400  | -1.79822200 | -3.50753600 | H  | -2.16145500 | 3.12870600  | 1.52747500  |
| C  | 4.85311400  | -0.85346100 | -3.31320200 | C  | -3.50365600 | 4.01705900  | 0.12788900  |
| H  | 5.35308800  | -1.60398600 | -3.91399500 | H  | -4.23873900 | 4.25094600  | 0.88883900  |
| C  | 5.57079200  | 0.21613700  | -2.79443700 | C  | -3.73593500 | 4.36335600  | -1.19717400 |
| H  | 6.63397700  | 0.29912300  | -2.98712800 | H  | -4.65259000 | 4.87232900  | -1.47132500 |
| C  | 4.92436000  | 1.18495300  | -2.03482800 | C  | -2.78650700 | 4.06952300  | -2.16918100 |
| H  | 5.48027600  | 2.02508800  | -1.63565600 | H  | -2.96010000 | 4.34865400  | -3.20188100 |
| C  | 3.56283600  | 1.08249500  | -1.79051600 | C  | -1.60203100 | 3.43682800  | -1.81803700 |
| H  | 3.07025200  | 1.85147200  | -1.20357900 | H  | -0.85378100 | 3.24679000  | -2.58001300 |
| C  | 0.43131500  | -3.31000400 | 0.27037100  | P  | 0.57716300  | -2.25371400 | -0.09363600 |
| C  | -0.10613700 | -4.45858800 | 0.85601400  | P  | 0.99127700  | 0.04727800  | 1.85311400  |
| H  | -1.15506700 | -4.50186400 | 1.11952700  | P  | 0.22010000  | 2.27587400  | -0.05804900 |
| C  | 0.70311600  | -5.55943000 | 1.10753200  | C  | 1.48099200  | 3.16833400  | -1.03121900 |
| H  | 0.27434400  | -6.44256800 | 1.56650600  | C  | 1.66777900  | 4.53420900  | -0.79150000 |
| C  | 2.05005300  | -5.53181700 | 0.77357600  | C  | 2.22802000  | 2.53345900  | -2.02097500 |
| H  | 2.67731100  | -6.39313300 | 0.97110700  | C  | 2.60679100  | 5.24307500  | -1.52471000 |
| C  | 2.59248600  | -4.39434000 | 0.18770700  | H  | 1.07816700  | 5.05296000  | -0.04342400 |
| H  | 3.64381600  | -4.36671000 | -0.07477600 | C  | 3.15992300  | 3.25202500  | -2.76011100 |
| C  | 1.79003900  | -3.28880500 | -0.05770900 | H  | 2.08541000  | 1.47831200  | -2.22028000 |
| H  | 2.23791800  | -2.40737800 | -0.50130900 | C  | 3.35224300  | 4.60354500  | -2.50973500 |
| C  | -2.24916900 | -2.27549800 | 0.64824400  | H  | 2.75173400  | 6.29959300  | -1.33225200 |
| C  | -3.32304700 | -2.83266300 | -0.04603600 | H  | 3.73436600  | 2.75557800  | -3.53337700 |
| H  | -3.27188400 | -3.00195400 | -1.11453200 | H  | 4.08048100  | 5.16311700  | -3.08502300 |
| C  | -4.47686200 | -3.19814700 | 0.63666700  | C  | 1.93414100  | -2.93963600 | -1.10527300 |
| H  | -5.30455300 | -3.63684600 | 0.09182600  | C  | 2.21578300  | -4.30606200 | -0.99355800 |
| C  | -4.56462600 | -3.01719400 | 2.01021900  | C  | 2.67960000  | -2.15170100 | -1.97939700 |
| H  | -5.46206000 | -3.31460000 | 2.53995600  | C  | 3.24414500  | -4.86355200 | -1.73686600 |
| C  | -3.49790700 | -2.46103300 | 2.70749700  | H  | 1.62915800  | -4.94169300 | -0.33922000 |
| H  | -3.56068600 | -2.32403700 | 3.78068100  | C  | 3.70240600  | -2.71894700 | -2.72984600 |
| C  | -2.34776800 | -2.08736700 | 2.02958200  | H  | 2.46367500  | -1.09502200 | -2.08056100 |
| H  | -1.51524800 | -1.67504100 | 2.59171300  | C  | 3.98718200  | -4.07162200 | -2.60635200 |
| Co | 0.29215600  | 0.21893200  | 0.02721700  | H  | 3.46103000  | -5.92122400 | -1.64423000 |
| P  | -1.37532500 | 1.51923700  | -0.87202500 | H  | 4.27456200  | -2.10368300 | -3.41429300 |
| P  | 1.03366900  | -0.02805800 | -2.03385100 | H  | 4.78500200  | -4.51337700 | -3.19178700 |
| P  | -0.65959300 | -1.88992200 | -0.16064200 | Co | 0.18598000  | -0.00530800 | -0.17620400 |
| H  | 0.94895500  | 1.51596900  | -0.13655500 | H  | -0.17152200 | 0.37592600  | -1.72882400 |
| N  | 1.89895000  | -0.30691800 | 0.85119300  | N  | -1.66782100 | -0.09429000 | 0.33511000  |
| H  | 2.77300600  | -0.15429100 | 0.34887800  | H  | -1.99436300 | 0.07139100  | 1.28594100  |
| H  | -0.07971800 | 0.93165200  | 1.43788500  | H  | -0.17510400 | -0.44403700 | -1.71326600 |
| H  | -0.50192200 | 0.22215000  | 1.45534800  | C  | -2.81118700 | -0.30225200 | -0.52644300 |
| C  | 2.15997000  | -0.62266600 | 2.24428100  | H  | -2.78692500 | 0.46408800  | -1.31390900 |
| H  | 1.23355500  | -0.92545900 | 2.73167500  | H  | -2.64776000 | -1.25692300 | -1.05156400 |
| H  | 2.85134500  | -1.47168700 | 2.28416500  | C  | -4.14291800 | -0.29374500 | 0.17255600  |
| C  | 2.76941700  | 0.58004500  | 2.93720500  | C  | -5.17780500 | 0.51230600  | -0.29592500 |

|                                                                                                          |             |             |             |                                                                                                           |             |             |             |
|----------------------------------------------------------------------------------------------------------|-------------|-------------|-------------|-----------------------------------------------------------------------------------------------------------|-------------|-------------|-------------|
| C                                                                                                        | 1.97645100  | 1.42056400  | 3.71728900  | C                                                                                                         | -4.36684300 | -1.10365200 | 1.28721100  |
| C                                                                                                        | 4.12847600  | 0.86064900  | 2.79339500  | C                                                                                                         | -6.41297800 | 0.51157800  | 0.33934300  |
| C                                                                                                        | 2.53614900  | 2.52139500  | 4.35273600  | H                                                                                                         | -5.02080500 | 1.14239000  | -1.16506700 |
| H                                                                                                        | 0.92577800  | 1.19316600  | 3.86934900  | C                                                                                                         | -5.59689900 | -1.09476000 | 1.93107700  |
| C                                                                                                        | 4.68600800  | 1.96342200  | 3.42497200  | H                                                                                                         | -3.58664800 | -1.77161600 | 1.63972900  |
| H                                                                                                        | 4.76420100  | 0.19757500  | 2.21402900  | C                                                                                                         | -6.62301700 | -0.28684800 | 1.45636000  |
| C                                                                                                        | 3.88965100  | 2.79717200  | 4.20194800  | H                                                                                                         | -7.21377700 | 1.13647400  | -0.03856600 |
| H                                                                                                        | 1.91926100  | 3.15457800  | 4.97988000  | H                                                                                                         | -5.76217300 | -1.73024100 | 2.79345100  |
| H                                                                                                        | 5.74667800  | 2.16311000  | 3.32702000  | H                                                                                                         | -7.58704900 | -0.28665500 | 1.95119900  |
| H                                                                                                        | 4.32847000  | 3.65052800  | 4.70553000  | H                                                                                                         | 1.58164000  | 0.10417000  | -0.56774900 |
| 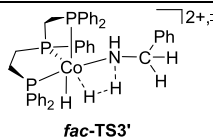 <p><i>fac-TS3'</i></p> |             |             |             |  <p><i>mer-TS3'</i></p> |             |             |             |
| C                                                                                                        | 1.49750900  | -1.44520800 | -2.73172600 | C                                                                                                         | 2.07868800  | 2.15032400  | -1.76869500 |
| H                                                                                                        | 1.81642300  | -0.52048300 | -3.21474100 | H                                                                                                         | 2.05394500  | 3.15845000  | -2.18323100 |
| H                                                                                                        | 2.16044900  | -2.24144200 | -3.07532600 | H                                                                                                         | 3.10918400  | 1.94623300  | -1.47010800 |
| C                                                                                                        | 0.04719900  | -1.74184900 | -3.07789000 | C                                                                                                         | 1.60969000  | 1.11013700  | -2.78387500 |
| H                                                                                                        | -0.24318800 | -2.74726600 | -2.76440500 | H                                                                                                         | 2.31517500  | 1.01494100  | -3.61233100 |
| H                                                                                                        | -0.13560100 | -1.66667800 | -4.15236900 | H                                                                                                         | 0.62547600  | 1.34766200  | -3.19454600 |
| C                                                                                                        | -0.91749300 | 1.08753400  | -3.00115500 | C                                                                                                         | 0.70256700  | -1.84732500 | -2.76904100 |
| H                                                                                                        | -0.72892000 | 0.95321700  | -4.06900400 | H                                                                                                         | -0.23521700 | -1.48642900 | -3.19771400 |
| H                                                                                                        | -1.88675900 | 1.57902100  | -2.89640900 | H                                                                                                         | 1.34591900  | -2.18285000 | -3.58510300 |
| C                                                                                                        | 0.16065400  | 1.94361500  | -2.34314600 | C                                                                                                         | 0.47979100  | -2.95768500 | -1.74328000 |
| H                                                                                                        | 0.06790900  | 2.98137100  | -2.66989900 | H                                                                                                         | 1.43647600  | -3.38300800 | -1.43180800 |
| H                                                                                                        | 1.16528500  | 1.59862600  | -2.59723500 | H                                                                                                         | -0.12178800 | -3.77140800 | -2.15067900 |
| C                                                                                                        | 3.24796700  | -0.27582400 | -0.65794700 | C                                                                                                         | 0.02199900  | 3.59315800  | -0.23439600 |
| C                                                                                                        | 3.98650500  | 0.25157300  | -1.71861600 | C                                                                                                         | -0.35546000 | 4.19483600  | -1.43751000 |
| H                                                                                                        | 3.65718000  | 0.15123500  | -2.74511700 | H                                                                                                         | -0.04367900 | 3.78621800  | -2.39195800 |
| C                                                                                                        | 5.19592600  | 0.89124500  | -1.47394400 | C                                                                                                         | -1.13827900 | 5.34138300  | -1.42739000 |
| H                                                                                                        | 5.77104500  | 1.28336000  | -2.30458500 | H                                                                                                         | -1.41453700 | 5.81140100  | -2.36399000 |
| C                                                                                                        | 5.67279100  | 1.01145700  | -0.17667800 | C                                                                                                         | -1.56031900 | 5.88783400  | -0.22142700 |
| H                                                                                                        | 6.62107400  | 1.50200600  | 0.00901300  | H                                                                                                         | -2.16794000 | 6.78503400  | -0.21640800 |
| C                                                                                                        | 4.93895800  | 0.49076500  | 0.88399300  | C                                                                                                         | -1.19307000 | 5.28935400  | 0.97804900  |
| H                                                                                                        | 5.31324400  | 0.57424500  | 1.89739100  | H                                                                                                         | -1.50974900 | 5.72101300  | 1.92025900  |
| C                                                                                                        | 3.73373700  | -0.14918600 | 0.64676800  | C                                                                                                         | -0.40707100 | 4.14558900  | 0.97571000  |
| H                                                                                                        | 3.18612200  | -0.57406200 | 1.48171600  | H                                                                                                         | -0.10292600 | 3.70555900  | 1.91894000  |
| C                                                                                                        | 2.14299700  | -2.90472600 | -0.25451800 | C                                                                                                         | 3.19573200  | -0.98721400 | -1.51693900 |
| C                                                                                                        | 3.33845500  | -3.48009000 | -0.70070800 | C                                                                                                         | 3.99781200  | -1.27924000 | -2.62803800 |
| H                                                                                                        | 3.99708300  | -2.94058100 | -1.37272800 | H                                                                                                         | 3.60753000  | -1.20113500 | -3.63777700 |
| C                                                                                                        | 3.70330300  | -4.74545800 | -0.26944600 | C                                                                                                         | 5.31448800  | -1.67395500 | -2.45004700 |
| H                                                                                                        | 4.62797100  | -5.18662300 | -0.62247200 | H                                                                                                         | 5.92947000  | -1.89894700 | -3.31341800 |
| C                                                                                                        | 2.89166100  | -5.44172000 | 0.62023000  | C                                                                                                         | 5.84259400  | -1.77997800 | -1.16766500 |
| H                                                                                                        | 3.18296800  | -6.42868200 | 0.95996400  | H                                                                                                         | 6.87230800  | -2.08900600 | -1.03129900 |
| C                                                                                                        | 1.71419300  | -4.86881100 | 1.07888700  | C                                                                                                         | 5.05255000  | -1.49027400 | -0.06417200 |
| H                                                                                                        | 1.08566300  | -5.40407400 | 1.78078000  | H                                                                                                         | 5.46315400  | -1.57113800 | 0.93522200  |
| C                                                                                                        | 1.33872000  | -3.60365600 | 0.64276100  | C                                                                                                         | 3.73180600  | -1.09433900 | -0.23515400 |
| H                                                                                                        | 0.41883900  | -3.16749300 | 1.01304500  | H                                                                                                         | 3.12861500  | -0.86769900 | 0.63557900  |
| C                                                                                                        | -2.75573300 | -1.19216400 | -2.39421000 | C                                                                                                         | -2.09110000 | -2.73834300 | -0.31431100 |
| C                                                                                                        | -3.66179300 | -0.57228900 | -3.25798700 | C                                                                                                         | -2.72032600 | -2.88724600 | -1.55460200 |
| H                                                                                                        | -3.39631300 | 0.32452600  | -3.80397500 | H                                                                                                         | -2.16699100 | -2.77532600 | -2.48032100 |

|    |             |             |             |    |             |             |             |
|----|-------------|-------------|-------------|----|-------------|-------------|-------------|
| C  | -4.92492400 | -1.11924200 | -3.44376200 | C  | -4.06793300 | -3.21768200 | -1.61720300 |
| H  | -5.62122500 | -0.63835200 | -4.12058800 | H  | -4.54370600 | -3.35274100 | -2.58148700 |
| C  | -5.29128600 | -2.27893200 | -2.77385800 | C  | -4.79864700 | -3.38549100 | -0.44777900 |
| H  | -6.27737900 | -2.70242600 | -2.92427000 | H  | -5.84792600 | -3.65113900 | -0.49862800 |
| C  | -4.39152500 | -2.90139800 | -1.91535100 | C  | -4.18206000 | -3.22354600 | 0.78747900  |
| H  | -4.67341700 | -3.81121300 | -1.39853100 | H  | -4.74908200 | -3.36153900 | 1.70043000  |
| C  | -3.13016600 | -2.36000500 | -1.72158600 | C  | -2.83610200 | -2.89582900 | 0.85878200  |
| H  | -2.43184900 | -2.86112500 | -1.05862700 | H  | -2.36032600 | -2.79625500 | 1.82813500  |
| C  | -1.53436200 | 2.83241800  | -0.17404200 | P  | 1.05949000  | 2.08157500  | -0.19569900 |
| C  | -1.43049600 | 4.18836000  | 0.14682000  | P  | 1.47752700  | -0.46120300 | -1.83415300 |
| H  | -0.45958600 | 4.64805900  | 0.28442700  | P  | -0.31903900 | -2.29292600 | -0.18774500 |
| C  | -2.57659700 | 4.95804700  | 0.29611300  | C  | 0.32713300  | -3.30637800 | 1.18418500  |
| H  | -2.48582700 | 6.00800100  | 0.54879900  | C  | 0.26193200  | -4.69987300 | 1.07239400  |
| C  | -3.83136900 | 4.38842700  | 0.12355000  | C  | 0.85748600  | -2.73038800 | 2.33673500  |
| H  | -4.72281200 | 4.99324700  | 0.24165200  | C  | 0.73828400  | -5.49915600 | 2.09972700  |
| C  | -3.94184400 | 3.04017200  | -0.19471400 | H  | -0.16953500 | -5.16726100 | 0.19398500  |
| H  | -4.91968800 | 2.59095500  | -0.32521000 | C  | 1.32611900  | -3.53771800 | 3.36611500  |
| C  | -2.80033500 | 2.26282000  | -0.33781000 | H  | 0.90336100  | -1.65330200 | 2.43786600  |
| H  | -2.90530500 | 1.20613500  | -0.55824000 | C  | 1.26994500  | -4.91933000 | 3.24701600  |
| C  | 1.34549800  | 2.81163800  | 0.23435500  | H  | 0.68833000  | -6.57774700 | 2.00791400  |
| C  | 2.19549900  | 3.60077800  | -0.54127300 | H  | 1.73236600  | -3.08594100 | 4.26343700  |
| H  | 2.10818400  | 3.62505800  | -1.62044200 | H  | 1.63611300  | -5.54803400 | 4.05018000  |
| C  | 3.16534100  | 4.38607200  | 0.07018000  | C  | 2.24234700  | 2.41227300  | 1.16156100  |
| H  | 3.81778200  | 5.00098000  | -0.53859300 | C  | 3.19379100  | 3.42311000  | 0.99137200  |
| C  | 3.28943800  | 4.39445700  | 1.45263700  | C  | 2.17462500  | 1.73131000  | 2.37587800  |
| H  | 4.03938700  | 5.01734300  | 1.92598500  | C  | 4.07557300  | 3.72720000  | 2.01719800  |
| C  | 2.44679700  | 3.60789200  | 2.23046400  | H  | 3.24651600  | 3.98648100  | 0.06640600  |
| H  | 2.53876000  | 3.61528000  | 3.31027100  | C  | 3.05396900  | 2.04757000  | 3.40459100  |
| C  | 1.48434100  | 2.81556600  | 1.62463400  | H  | 1.43287800  | 0.95748200  | 2.52998200  |
| H  | 0.82763500  | 2.21413400  | 2.24423200  | C  | 4.00700400  | 3.04043800  | 3.22461600  |
| Co | -0.23965500 | -0.43085200 | -0.09525300 | H  | 4.81306200  | 4.50867900  | 1.87656600  |
| P  | 1.71373800  | -1.24184200 | -0.89536400 | H  | 2.99145600  | 1.51901800  | 4.34866600  |
| P  | -1.06071100 | -0.57185100 | -2.17309400 | H  | 4.69379000  | 3.28550600  | 4.02627300  |
| P  | -0.01776700 | 1.84221700  | -0.49388100 | Co | 0.07542800  | -0.01763000 | -0.16628200 |
| H  | -0.45067700 | -1.86937000 | -0.32040300 | H  | -0.42587200 | 0.14929700  | 1.28025100  |
| N  | -1.67190800 | -0.49974300 | 1.16914100  | N  | -1.74330400 | 0.35842300  | -0.73763200 |
| H  | -2.16646100 | -1.38874600 | 1.18865300  | H  | -2.33793600 | -0.47233300 | -0.77831200 |
| H  | -0.30487700 | -0.67477600 | 1.46029300  | H  | -1.26479700 | 0.30667700  | 0.61719300  |
| H  | 0.66424700  | -0.30395900 | 1.15125700  | C  | -2.59710700 | 1.53883700  | -0.89651400 |
| C  | -2.07880500 | 0.30898700  | 2.32756700  | H  | -2.05750400 | 2.41830200  | -0.55373100 |
| H  | -1.42433000 | 1.17814900  | 2.39563700  | H  | -2.74777300 | 1.66361200  | -1.97733300 |
| H  | -3.08182400 | 0.68690100  | 2.09831800  | C  | -3.92757300 | 1.40185000  | -0.20444000 |
| C  | -2.09031800 | -0.49136700 | 3.60352500  | C  | -4.03079200 | 1.64758100  | 1.16593800  |
| C  | -0.97263400 | -0.50705500 | 4.43830500  | C  | -5.06738200 | 1.03366500  | -0.91669300 |
| C  | -3.20892000 | -1.25164600 | 3.94645900  | C  | -5.25263700 | 1.52342500  | 1.81249300  |
| C  | -0.97277200 | -1.27251700 | 5.59690500  | H  | -3.15930700 | 1.97050200  | 1.72825800  |
| H  | -0.10637700 | 0.10414700  | 4.20209100  | C  | -6.29128700 | 0.91348200  | -0.27079100 |
| C  | -3.20739300 | -2.01926000 | 5.10288200  | H  | -5.00679800 | 0.86284600  | -1.98717900 |
| H  | -4.09777800 | -1.22451500 | 3.32270700  | C  | -6.38438300 | 1.15535700  | 1.09414500  |
| C  | -2.08823400 | -2.03215800 | 5.92730000  | H  | -5.32729800 | 1.73022700  | 2.87384400  |
| H  | -0.10759300 | -1.26668600 | 6.24959000  | H  | -7.17622100 | 0.64569600  | -0.83632900 |
| H  | -4.08575500 | -2.59467700 | 5.37075600  | H  | -7.34133300 | 1.07184100  | 1.59589600  |
| H  | -2.09149800 | -2.62297300 | 6.83572600  | H  | 1.22366600  | -0.35041500 | 0.65125200  |

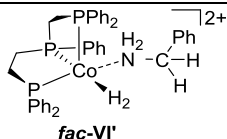

|   |             |             |             |
|---|-------------|-------------|-------------|
| C | -2.16471300 | 1.72912200  | -1.92905500 |
| H | -2.61806600 | 0.80659100  | -2.29631000 |
| H | -2.86254200 | 2.54304300  | -2.13413300 |
| C | -0.81417300 | 1.98226200  | -2.58242500 |
| H | -0.46113400 | 2.99115800  | -2.35874100 |
| H | -0.85607200 | 1.88692500  | -3.66985600 |
| C | 0.43941200  | -0.70213800 | -2.97138100 |
| H | 0.34369100  | -0.40496700 | -4.01894800 |
| H | 1.41785500  | -1.17276600 | -2.85567900 |
| C | -0.66307700 | -1.67340400 | -2.56218600 |
| H | -0.55106700 | -2.62049400 | -3.09364100 |
| H | -1.65157900 | -1.28987700 | -2.82407500 |
| C | -3.52448400 | 1.16661400  | 0.64093200  |
| C | -4.60956100 | 0.73199300  | -0.12120800 |
| H | -4.52529200 | 0.59082500  | -1.19163200 |
| C | -5.83310700 | 0.48952300  | 0.49061900  |
| H | -6.67637400 | 0.16711300  | -0.10873100 |
| C | -5.97703800 | 0.66462300  | 1.86028900  |
| H | -6.93484800 | 0.48000100  | 2.33254800  |
| C | -4.89540900 | 1.08914800  | 2.62511300  |
| H | -5.00845300 | 1.23822400  | 3.69255200  |
| C | -3.67390700 | 1.34202900  | 2.02012700  |
| H | -2.84860100 | 1.70677100  | 2.62323200  |
| C | -1.51074400 | 3.23914900  | 0.48930400  |
| C | -2.37816900 | 4.29915900  | 0.20918700  |
| H | -3.29064600 | 4.13475100  | -0.35352800 |
| C | -2.08971500 | 5.57352000  | 0.67321600  |
| H | -2.76569600 | 6.39129900  | 0.45250300  |
| C | -0.94530000 | 5.80049900  | 1.43115200  |
| H | -0.72936500 | 6.79666200  | 1.79916400  |
| C | -0.08669300 | 4.75024300  | 1.72623100  |
| H | 0.79644800  | 4.92313400  | 2.33022000  |
| C | -0.36870000 | 3.47336200  | 1.25515400  |
| H | 0.30434600  | 2.65597200  | 1.49959800  |
| C | 2.07799000  | 1.63052900  | -2.18044600 |
| C | 3.05402700  | 1.10769900  | -3.03281700 |
| H | 2.89181400  | 0.18625200  | -3.57750500 |
| C | 4.25160700  | 1.78693500  | -3.21646500 |
| H | 4.99917500  | 1.38091900  | -3.88761100 |
| C | 4.48682000  | 2.98317400  | -2.55228400 |
| H | 5.42100600  | 3.51133900  | -2.70262600 |
| C | 3.52179000  | 3.50626800  | -1.69846100 |
| H | 3.70111600  | 4.44304800  | -1.18406700 |
| C | 2.32413700  | 2.83416400  | -1.50825900 |
| H | 1.57711100  | 3.25799500  | -0.84454200 |
| C | 0.61310200  | -3.20150900 | -0.38124100 |
| C | 0.68878400  | -3.70080500 | 0.92427100  |

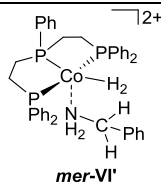

|   |             |             |             |
|---|-------------|-------------|-------------|
| C | -1.01647300 | 3.29287600  | 1.24807800  |
| H | -0.57365200 | 4.12794500  | 1.79312000  |
| H | -1.68168400 | 3.70036400  | 0.48280800  |
| C | -1.77030900 | 2.35955100  | 2.18313800  |
| H | -2.63813300 | 2.84222600  | 2.63549500  |
| H | -1.13005000 | 2.02515200  | 3.00336900  |
| C | -2.72361200 | -0.46665800 | 2.41306100  |
| H | -1.99287400 | -0.44877200 | 3.22599700  |
| H | -3.70315400 | -0.24676500 | 2.84323300  |
| C | -2.72218300 | -1.80516900 | 1.68414000  |
| H | -3.60429200 | -1.89249900 | 1.04597200  |
| H | -2.73965500 | -2.64339400 | 2.38297500  |
| C | 1.76571000  | 2.44042700  | 1.48194300  |
| C | 1.79039000  | 1.61499200  | 2.61054800  |
| H | 0.99799200  | 0.89291700  | 2.78517300  |
| C | 2.83762300  | 1.69842100  | 3.51715800  |
| H | 2.84672600  | 1.06120100  | 4.39379700  |
| C | 3.87675900  | 2.59538900  | 3.29701800  |
| H | 4.69602600  | 2.65965100  | 4.00337900  |
| C | 3.86772500  | 3.40253100  | 2.16718000  |
| H | 4.68162800  | 4.09522700  | 1.98768300  |
| C | 2.81805600  | 3.32809500  | 1.25970300  |
| H | 2.82753100  | 3.95955300  | 0.38002600  |
| C | -3.73179000 | 1.26529500  | 0.24642500  |
| C | -4.54961000 | 2.34208100  | 0.59876000  |
| H | -4.29970100 | 2.99005600  | 1.42950600  |
| C | -5.71244800 | 2.59863000  | -0.11462400 |
| H | -6.33830800 | 3.43746400  | 0.16630900  |
| C | -6.07411800 | 1.78385300  | -1.17942400 |
| H | -6.98349300 | 1.98634000  | -1.73284200 |
| C | -5.26939500 | 0.70791400  | -1.53295000 |
| H | -5.54905700 | 0.06826500  | -2.36175800 |
| C | -4.10080700 | 0.45279300  | -0.82987200 |
| H | -3.48506500 | -0.38898700 | -1.12632900 |
| C | 0.00642600  | -2.93947500 | 1.46026800  |
| C | 0.24039700  | -2.70038900 | 2.81791100  |
| H | -0.34772900 | -1.97178100 | 3.36441300  |
| C | 1.21039000  | -3.42331600 | 3.49749500  |
| H | 1.36876200  | -3.24954900 | 4.55550300  |
| C | 1.96791400  | -4.37693300 | 2.82669100  |
| H | 2.71928700  | -4.94588300 | 3.36156400  |
| C | 1.75012500  | -4.61000400 | 1.47527700  |
| H | 2.32881800  | -5.36208500 | 0.95198800  |
| C | 0.77543800  | -3.89480000 | 0.78967500  |
| H | 0.59002500  | -4.11443800 | -0.25581900 |
| P | 0.32171500  | 2.34352800  | 0.35213100  |
| P | -2.23430900 | 0.85868500  | 1.21559500  |

|    |             |             |             |    |             |             |             |
|----|-------------|-------------|-------------|----|-------------|-------------|-------------|
| H  | -0.01000900 | -3.36022200 | 1.68255700  | P  | -1.24836600 | -1.96266100 | 0.54338900  |
| C  | 1.61680000  | -4.67848200 | 1.25114500  | C  | -1.80838900 | -3.05872300 | -0.81007200 |
| H  | 1.64718600  | -5.07603500 | 2.25914900  | C  | -2.46954400 | -4.25057600 | -0.49288600 |
| C  | 2.49177900  | -5.16128300 | 0.28356300  | C  | -1.58216100 | -2.73664100 | -2.14814800 |
| H  | 3.21163800  | -5.93057300 | 0.53697800  | C  | -2.90301200 | -5.09429200 | -1.50409000 |
| C  | 2.42925300  | -4.66700600 | -1.01159000 | H  | -2.63918000 | -4.53184400 | 0.54044800  |
| H  | 3.09932500  | -5.04981100 | -1.77259500 | C  | -2.01409900 | -3.58788000 | -3.15814700 |
| C  | 1.49397900  | -3.69298800 | -1.34574000 | H  | -1.06698000 | -1.82197100 | -2.41896700 |
| H  | 1.44849000  | -3.35271400 | -2.37350400 | C  | -2.67656100 | -4.76428300 | -2.83636200 |
| C  | -2.24040700 | -2.85068600 | -0.38854500 | H  | -3.41641600 | -6.01465300 | -1.25161400 |
| C  | -2.57263900 | -3.97675700 | -1.14890600 | H  | -1.83273900 | -3.33110100 | -4.19519700 |
| H  | -1.93500100 | -4.30599700 | -1.96175400 | H  | -3.01534800 | -5.42805900 | -3.62311600 |
| C  | -3.71735800 | -4.70010400 | -0.85351000 | C  | 0.67511600  | 3.37840600  | -1.11480400 |
| H  | -3.97164300 | -5.57043800 | -1.44707800 | C  | 0.69762100  | 4.77300000  | -1.00114500 |
| C  | -4.52836700 | -4.31998100 | 0.21135300  | C  | 0.89224500  | 2.79572700  | -2.36422200 |
| H  | -5.41655500 | -4.89504200 | 0.44582000  | C  | 0.94184200  | 5.56056900  | -2.11702100 |
| C  | -4.19705400 | -3.21068800 | 0.97596800  | H  | 0.52888800  | 5.25618600  | -0.04573500 |
| H  | -4.82431500 | -2.91596200 | 1.80869200  | C  | 1.13684800  | 3.58740700  | -3.47849800 |
| C  | -3.05721400 | -2.47394900 | 0.67595400  | H  | 0.86845500  | 1.71838900  | -2.48018500 |
| H  | -2.81760500 | -1.60220600 | 1.27351500  | C  | 1.16244700  | 4.96996800  | -3.35569400 |
| Co | -0.07726900 | 0.19360800  | 0.17241800  | H  | 0.95787800  | 6.63962000  | -2.01809300 |
| P  | -1.90259700 | 1.55013100  | -0.10486300 | H  | 1.30236900  | 3.12462000  | -4.44431700 |
| P  | 0.46726600  | 0.81673700  | -1.91111000 | H  | 1.35074400  | 5.58859100  | -4.22523400 |
| P  | -0.68773700 | -1.94265100 | -0.72337500 | Co | -0.41935900 | 0.15635200  | 0.08318000  |
| H  | -0.56957800 | -0.59180800 | 1.53131800  | H  | -0.94487500 | 0.79599900  | -1.53396900 |
| H  | -0.58562100 | 0.19559900  | 1.75094600  | N  | 1.32213600  | -0.66826900 | -0.64547900 |
| H  | 2.49919800  | 0.32284900  | 0.12244500  | H  | 1.44250900  | -1.55367800 | -0.15160100 |
| C  | 2.26117400  | -0.10927300 | 2.11074100  | H  | 1.14886400  | -0.95598400 | -1.60759500 |
| H  | 1.93662300  | 0.87711400  | 2.44703000  | C  | 2.67773800  | -0.01606800 | -0.63525900 |
| C  | 3.73928200  | -0.27033300 | 2.31925600  | H  | 2.58948100  | 0.94550300  | -1.13966600 |
| C  | 4.56647600  | 0.84991000  | 2.39777700  | H  | 2.93341400  | 0.17740700  | 0.40512900  |
| C  | 4.30578300  | -1.54210200 | 2.41730500  | C  | 3.71467100  | -0.87359900 | -1.30234200 |
| C  | 5.93664500  | 0.70285500  | 2.56781300  | C  | 3.90475300  | -0.80099000 | -2.68338700 |
| H  | 4.13718700  | 1.84622300  | 2.34742000  | C  | 4.48316700  | -1.76970300 | -0.55888100 |
| C  | 5.67526200  | -1.68950900 | 2.58558700  | C  | 4.83737800  | -1.61499700 | -3.31115500 |
| H  | 3.67207900  | -2.42325700 | 2.38126800  | H  | 3.33958200  | -0.08429600 | -3.27289800 |
| C  | 6.49202200  | -0.56712200 | 2.65985300  | C  | 5.41819500  | -2.58262800 | -1.18562500 |
| H  | 6.56994800  | 1.57910100  | 2.64229400  | H  | 4.36605300  | -1.81853200 | 0.51955900  |
| H  | 6.10615600  | -2.67995200 | 2.67414500  | C  | 5.59378800  | -2.50848600 | -2.56205800 |
| H  | 7.56006900  | -0.68274900 | 2.80217900  | H  | 4.98678300  | -1.54213100 | -4.38207900 |
| N  | 1.86066600  | -0.25408800 | 0.66929900  | H  | 6.02161500  | -3.26513300 | -0.59843900 |
| H  | 2.06724900  | -1.21315000 | 0.39003200  | H  | 6.33013800  | -3.13668800 | -3.04941000 |
| H  | 1.70020300  | -0.85491000 | 2.67645100  | H  | -1.26857200 | 0.08476100  | -1.52365200 |
